# Supplementary material
Source: publisher figshare collection journal article supplement (https://rs.figshare.com/ndownloader/files/30855989)
Supplement: Supplementary file 1 [file 30855989]

## Sheet: Males in non-breedind season
Wave length (nm)	M1.head	M1.dorsal	M1.tail	M1.cheek	M1.lowerjaw	M1.lateral	M1.posterior lateral	M2.head	M2.dorsal	M2.tail	M2.cheek	M2.lowerjaw	M2.lateral	M2.posterior lateral	M3.head	M3.dorsal	M3.tail	M3.cheek	M3.lowerjaw	M3.lateral	M3.posterior lateral	M4.head	M4.dorsal	M4.tail	M4.cheek	M4.lowerjaw	M4.lateral	M4.posterior lateral	M5.head	M5.dorsal	M5.tail	M5.cheek	M5.lowerjaw	M5.lateral	M5.posterior lateral	M6.head	M6.dorsal	M6.tail	M6.cheek	M6.lowerjaw	M6.lateral	M6.posterior lateral	M7.head	M7.dorsal	M7.tail	M7.cheek	M7.lowerjaw	M7.lateral	M7.posterior lateral
187.922	1.14	2.07333	1.51	2.97667	11.7433	-7.41e-17	2.16	0.5	-4.00333	0.16	2.23	17.4367	0.866667	1.44667	2.59667	-0.15	-1.66667	1.59	14.7333	-3.24667	-0.48	1.01	0.18	1.56	2.13333	23.89	5.11333	1.02667	0.98	3.41333	0.246667	-0.1	26.07	-0.246667	0.233333	6.06333	5.64333	5.08667	7.18333	30.44	4.84	7.05333	6.22333	6.4	8.02	5.28667	21.2667	4.91667	6.72333
188.301	1	0.91	1.24	1.98667	11.7267	0.0833333	1.29667	1.08667	-3.18667	1.90333	0.856667	17.81	1.56667	1.00333	2.22667	-0.616667	-2.11667	2.82667	14.82	-2.61	0.0466667	1.27	-0.566667	0.803333	1.90333	24.3467	4.57667	2.01667	0.823333	3.31667	-0.543333	1.2	25.6867	-0.31	-0.923333	5.09	4.10667	4.27333	6.71333	30.52	3.78667	5.24	4.31	4.83667	6.58	4.04333	19.5533	2.80333	4.34
188.68	1.50667	-0.00666667	0.133333	1.1	12.0733	-0.183333	-0.406667	1.03	-3.98333	0.976667	0.563333	17.0367	1.98667	1.14667	2.80667	-2.59	-0.69	1.07667	14.8067	-1.27333	-2.41667	0.776667	-1.15	0.716667	3.57667	23.9867	4.69	1.61667	0.973333	2.51	0.213333	1.22	25.34	0.27	-1.56333	2.71333	1.92	2.30667	5.59667	27.9867	1.96333	5.34667	2.19667	4.26	4.55333	2.42	17.7833	-0.256667	2.05
189.059	2.28	-0.183333	0.82	1.87333	13.56	0.73	0.306667	1.37	-3.37667	1.63667	2.23667	18.7567	2.24	2.05333	3.16667	-1.79	0.846667	2.29667	14.81	-0.336667	0.106667	1.04333	-0.716667	0.756667	2.35	24.48	5.61667	1.89	1.67667	3.04	0.576667	2.38	25.8067	1.49	-0.06	-0.583333	-0.316667	-0.746667	2.38	25.27	0.156667	0.81	-0.736667	1.94333	2.14	-0.253333	15.9433	-3.78	-1.6
189.438	2.81	-0.516667	0.833333	1.49667	14.77	1.46	-0.0733333	3.04	-2.10333	2.49	2.32333	18.86	2.25333	1.54	3.63333	-1.75333	1.18667	2.89667	15.06	0.27	1.16333	-0.37	-0.21	0.6	1.45	24.9633	5.51333	2.21667	1.41	3.19	0.51	2.53333	26.8133	1.53667	0.843333	0.853333	-0.02	-2.12333	1.84333	25.91	0.11	1.08	0.243333	1.52	1.48	-0.483333	15.9433	-2.12667	-1.55667
189.817	6.41	2.65667	1.7	3.72667	17.2767	5.04667	2.79667	5.03	0.943333	4.33667	5.31667	20.6133	4.66	4.00333	5.62667	1.86667	2.48	6.21	17.8633	3.51	4.41667	1.34333	1.64	2.87	2.85	26.1967	9.22667	3.29667	4.36667	3.7	3.71333	4.47333	28.86	3.95667	3.68333	-1.64	-3.22667	-4.87333	-1.12	22.72	-1.65667	-2.38	-2.06	-0.14	-0.47	-2.64667	13.29	-3.90667	-3
190.195	5.44	2.38333	1.67333	2.75333	14.8133	4.58333	1.45667	3.77667	-0.666667	3.54	4.73333	18.6367	3.84667	2.21667	4.77	0.89	1.87	4.54333	16.6333	1.33	3.80667	0.62	0.383333	3.32667	1.66667	24.8767	7.79333	1.32667	3.41	2.53667	3.87333	2.26333	27.49	2.56667	2.27333	-0.846667	-1.82	-3.75667	-0.976667	23.98	-1.58333	-1.75	-0.973333	-1.62667	0.213333	-2.29333	14.12	-2.31	-1.25333
190.574	4.76667	2.72333	0.95	2.54667	13.6533	3.86	2.82667	3.11667	0.323333	3.69667	3.91333	17.6567	3.56	2.42	5.09333	1.67333	1.21333	4.89667	15.38	-0.153333	3.06333	0.326667	-3.7e-17	2.76667	-0.223333	23.92	6.74333	-0.506667	1.95333	1.57	3.27667	1.37	26.5167	1.52333	2.79333	1.17333	1.10667	-0.283333	-0.273333	27.3333	0.77	-0.553333	0.823333	1.16333	2.64	-0.116667	16.82	1.52333	1.20333
190.953	6.31333	5.07333	1.66333	2.28667	15.4233	5.01	3.84	3.22	1.08	3.95667	5.42	17.54	6.38	2.7	6.29333	2.68	1.04333	6.42333	16.06	0.516667	3.99333	0.983333	2.19667	5.48333	1.14667	25.2933	7.54	0.2	3.72333	1.70667	4.51333	2.51333	26.4367	3.00667	3.28667	5.23	3.56333	4.47667	3.77	29.99	3.75333	2.88667	3.81667	5.10667	4.16667	2.96667	19.27	4.43	5.52333
191.331	5.86667	5.39333	2.67	2.98	15.9567	5.51333	5.04333	1.43333	0.836667	3.32333	5.75	17.82	5.97	3.44667	6.65333	3.59333	2.16333	7.20333	14.86	1.07	3.58	1.68	2.42333	6.26333	2.33667	24.9467	7.61333	0.433333	4.29	0.47	4.13	2.73667	25.8033	2.99	2.67	6.59333	5.10333	7.15333	5.75667	30.9333	5.07667	4.68333	5.35333	6.98	6.46333	5.89	20.52	6.54333	7.45667
191.71	5.03333	5.27667	2.24	1.1	15.89	4.18333	3.86667	2.00333	0.683333	3.84667	5.71333	18.41	3.87667	2.56667	6.43	2.58333	2.99667	6.24667	14.37	0.8	2.56333	2.35667	2.46333	5.72	4.26667	24.7267	5.28	1.33	3.99333	1.69333	2.29667	2.71667	25.3067	1.41	1.96667	6.86333	5.88667	6.87	7.20333	31.9633	5.77333	5.72	5.33667	6.48667	5.82667	6.56	21.6667	7	6.74
192.088	6.67	5.76	2.91667	2.22333	17.6367	5.38333	5.01667	2.67667	1.66667	4.81667	7.38667	18.6133	3.11333	3.07667	8.16333	3.6	3.93333	6.57	14.95	1.97667	2.72667	4.09667	3.50667	5.03	6.08667	25.3533	7.16	2.98	4.71	3.98	3.58	3.23667	27.4267	1.83	3.17667	8.26333	6.86333	6.78667	8.85	31.3567	6.39333	6.20333	6.50667	8.23667	5.59667	6.99667	22.2	7.45667	7.82333
192.467	8.12333	5.07	3.82	2.90333	19.3833	6.41333	5.19	3.29667	2.28	4.85	9.32333	19.6933	3.49	2.85	7.99667	3.64667	4.56	7.21333	16.73	4.08667	4.12333	3.84333	4.7	5.62333	6.27667	26.3133	7.34667	4.57	6.89333	5.10333	3.76667	4.06333	28.95	2.40333	4.25667	7.13333	6.43667	5.01333	8.31333	30.83	4.84	5.87	5.69	5.86667	4.44667	7.99333	21.2567	5.85333	6.42
192.845	4.83333	3.13333	2.29	1.36667	16.6467	4.66667	3.23667	2.43	0.446667	4.29667	6.89	17.3567	-0.0866667	2.19333	7.01	1.54667	3.00333	3.71	14.4833	2.10333	1.10667	2.39333	1.32333	2.62333	4.69333	24.5133	4.91333	3.19667	3.94	3.12	1.35667	1.48667	27.75	0.166667	2.31333	4.69667	5.63	2.23333	6.64333	29.1567	3.61667	4.76333	4.14333	3.76	3.76	8.17667	19.6567	4.74333	3.18
193.224	3.88333	1.35667	0.00666667	0.18	15.0633	2.09	0.216667	1.34	-1.67333	3.32667	5.39333	16.2967	-2.21667	0.14	5.06667	-0.08	1.10667	2.19333	14.6667	0.33	0.116667	1.16667	0.0666667	1.29	3.71333	23.7033	3.43333	1.44667	2.42	2.89333	-0.143333	0.483333	27.7733	-1.04	1.43667	4.76667	6.26	1.93	7.84	29.5833	4.25	5.28	4.47667	4.01333	3.14667	7.66333	20.61	4.69	3.06333
193.602	4.87	0.59	0.693333	1.91333	15.7933	2.78	0.643333	0.73	-1.79667	2.52333	5.06667	16.3333	-0.35	1.07	4.87333	1.91667	0.616667	2.35	15.3033	0.436667	-0.143333	0.876667	0.54	2.62667	2.3	24.6533	4.86667	0.516667	2.27	2.61	0.903333	0.69	28.61	0.586667	2.66	6.79	6.22333	3.59667	8.17667	31.05	5.38667	4.82	5.98667	6.28667	4.00667	7.41	20.9133	5.07333	3.08333
193.981	4.72333	1.72667	1.84667	2.29333	16.2067	2.98333	1.82667	1.34	-1.05	3.2	5.22	17.8667	0.99	2.09667	5.21667	3.58333	1.64333	4.06	16.1667	1.12	0.36	1.34667	1.88667	3.13	3.54	23.84	4.64	0.58	2.68667	3.51	1.22	2.68333	27.9667	2.85	3.43667	6.62333	5.74333	4.56667	8.08333	32.3833	7.06	5.85667	7	7.01667	4.57	8.47333	21.0967	5.44667	2.95667
194.359	5.83667	4.10667	2.55	3.26667	15.7367	5.34333	3.49	2.34	0.0833333	4.54333	5.39333	19.53	3.10667	3.09	5.54	5.50667	2.85667	5.89333	16.5167	2.84667	2.18	3.23667	2.76667	5.66	5.06667	24.8533	5.56333	2.33667	2.41667	5.25667	4.19333	3.33667	29.98	5.01333	4.85667	6.31	4.17	3.34	8.39	31.4533	7.46667	5.33333	6.04667	6.7	4.02667	5.52667	19.88	4.52333	2.87333
194.737	5.65667	3.3	1.49333	2.26333	15.21	3.98	2.25333	1.21	-0.0333333	2.66	5.63	20.5333	2.48667	1.95	5.04	5.71667	2.13667	5.52	16.3633	1.60667	2.47667	3.09333	3.00667	4.72667	5.34333	25.3	6.68667	1.63	2.00667	5.27667	2.45	3.29333	29.79	4.54667	3.81	7.03	5.38333	4.55	9.78667	31.3633	7.37	5.26333	5.88333	7.23667	4.16	4.17667	20.7667	5.05667	4.26
195.116	4.78667	4.45	1.33333	2.14667	14.86	3.75	2.39	2.39667	1.57333	3.14667	5.43667	19.55	3.51333	2.89333	5.41333	6.68333	2.5	5.78667	16.2933	1.69	2.92333	4.13667	4.18333	5.26667	4.55333	25.1067	7.05667	2.27	2.71667	6.04333	3.90667	4.18333	29.2933	4.15667	3.81	5.02	3.62667	4.46	7.91	30.5233	5.46667	5.19333	4.70333	6.19	4.33	3.43667	19.6	4.25333	2.70333
195.494	3.32	4.03	0.653333	1.63333	14.7367	2.58	1.10333	2.95333	1.34667	3.28	5.62	18.8533	4.17667	2.63	5.03	5.06	1.92333	5.44333	15.0733	0.68	3.64	2.50333	3.69333	3.46333	4.39	24.3067	6.64333	3.10667	2.04667	5.88	4.06667	3.65667	28.8267	2.90667	4.07667	2.69	3.76333	4.09333	7.62667	28.9067	4.09	4.93	3.44	3.63667	4.41667	4.09333	19.0467	2.88	2.84333
195.872	2.9	3.35	0.38	1.89	14.67	2.61	0.52	4.1	1.29	2.46333	5.99667	18.2867	4.70667	2.51333	4.72667	4.92	2.48667	4.60667	14.64	1.13	3.55333	1.31333	3.39	3.58333	4.05	26.3433	6.87667	2.74	2.27667	4.08667	3.07333	3.23333	29.72	2.46667	3.67333	0.856667	2.68667	3.36333	5.79333	27.5067	2.5	3.73	1.64333	1.57333	3.62333	1.64333	18.1367	1.50333	2.14
196.25	1.74667	2.48667	-0.22	1.61333	14.4433	1.00667	-0.783333	4	0.21	1.33333	4.95333	18.1533	3.22667	2.71667	4.94	3.64333	1.17667	3.74	15.4267	-0.623333	3.03	0.74	3.10667	2.73667	4.42333	25.67	7.44	1.67	2.88667	2.31	1.30333	3.02667	28.7133	1.74333	2.90667	1.29333	3.51	5.24333	6.83	27.4633	4.37667	3.28333	3.51333	2.43333	4.72333	3.05	19.0533	1.97	3.70333
196.628	0.97	2.29667	-0.433333	1.88	13.96	-0.536667	-0.38	3.92333	-0.836667	1.19	2.97333	18.8833	2.95333	1.57	3.35667	1.75	-0.19	2.89333	14.2933	-1.37	0.886667	-0.663333	1.39667	2.37333	2.70333	24.6267	5.08333	0.54	1.85667	1.26	2.48	2.38667	28.14	0.52	1.98667	1.59	2.82667	4.71	6.08667	28.63	3.14	4.27	3.41	1.54333	4.49	3.26	17.8	1.47	3.26333
197.006	2.76667	2.50333	0.503333	3.11333	14.6767	1.38333	2.26333	3.71667	-0.203333	1.93667	5.23333	19.76	4.68	2.34	4.81	3.36	0.813333	4.11667	15.5433	0.08	2.19667	1.18333	1.42333	3.28667	4.38333	25.5567	5.96333	1.92667	2.60333	1.69667	3.22333	4.01	29.75	2.22333	4.01667	2.82333	4.01333	5.35667	7.13333	29.6667	4.55333	4.28667	4.03667	1.37	5.34	2.89	17.4667	2.42	3.77667
197.385	2.27667	2.13333	1.35	2.60333	13.6567	1.54333	2.59	2.67333	-0.0433333	2.44	4.21333	19.3633	2.92333	1.88667	4.85	3.37333	1.36333	4.37667	16.5667	0.05	1.79667	2.35333	1.27333	4.37333	3.96333	25.93	6.26	1.6	3.08333	2.23	1.81	3.32	30.0667	2.49	2.94333	4.28667	3.77667	5.11333	7.13333	29.8467	5.22333	3.97	4.90333	2.72333	4.29333	2.80333	16.55	3.05	4.51
197.763	3.29667	3.53	1.77667	3.44	14.5667	2	2.78	2.34	0.266667	3.6	4.92333	20.26	2.88	1.89667	5.05333	2.89	0.943333	5.4	16.6333	-0.67	3.11	3.53	1.97667	4.65	4.12333	25.0867	7.58667	2.22	3.68	3.37333	1.98333	3.49	30.4033	2.93667	3.05	6.13	5.18333	5.73667	8.72333	31.5233	6.64333	4.97667	6.32	4.39667	5.4	4.91667	16.3533	4.77	5.20333
198.141	2.81	3.02333	2.08	2.01333	14.4133	1.97667	1.85	2	0.103333	3.49333	5.21333	19.5133	3.18667	0.81	5.39	2.70333	1.89667	4.72667	14.72	-0.85	1.97	2.50667	1.21333	3.91667	2.63	24.3133	7.37333	1.91667	3.03	3.73667	1.93	3.14333	29.8867	1.42333	2.49333	8.01667	5.96667	6.20667	9.54333	32.1033	6.87	7.14	7.56	5.71667	6.05667	6.33667	17.44	6.46333	5.92
198.519	3.61667	2.68	2.49333	2.14333	14.3367	3.61	2.50333	2.90333	0.433333	3.52333	6.41333	17.85	4.51	0.826667	5.86	3.51667	2.35	5.86333	15.6533	0.453333	3.05333	2.79	1.9	3.70667	3.09333	24.97	8.15333	2.67	3.72	4.56	2.61	3.16667	28.8233	1.95333	2.67	9.32667	6.82333	7.54333	11.02	32.39	8.64667	8.38	9.58333	6.67	7.42667	8.2	18.8967	7.78	8.28333
198.897	3.48	2.27333	2.75	1.66333	14.2367	4.23667	1.71667	3.5	0.09	3.81667	5.59333	17.9567	3.42667	0.133333	4.86333	1.82	2.09	4.47333	14.8267	0.41	2.28667	1.41	2.25	2.71333	1.77333	25.3033	9.15	3.06333	3.36	4.35667	2.43667	2.14333	28.6033	1.99333	0.363333	9.86667	7.42333	7.91667	11.0933	32.77	9.68	8.05667	10.1933	8.99	6.98667	9.24333	20.9733	7.45	9.09333
199.274	4.15	2.71	2.74667	1.95667	14.52	4.74333	2.54	4.81	0.636667	3.41	7.10667	17.9733	5.02667	0.793333	4.92333	1.78667	1.60667	5.39667	14.5733	1.60333	2.96	1.48667	2.54333	3.45	2.75333	24.9933	9.68333	3.20667	4.17667	3.70667	3.82667	2.88	28.6467	2.31	1.32	9.75	6.85333	8.4	11	33.71	9.37667	8.45	9.09	8.58333	8.13333	8.4	22.11	7.23	8.40667
199.652	3.04	0.73	1.29333	-0.373333	12.37	2.49	1.52333	4.57	-0.343333	2.13667	5.22667	16.8767	4.06333	-0.393333	2.38667	0.576667	-0.693333	3.36333	14.2133	1.01333	0.896667	-0.246667	1.40667	2.22667	1.15	24.7033	6.94	1.63	3.25667	2.08333	3.00667	1.65333	26.9767	0.93	0.35	7.91667	5.12333	6.85	9.76333	31.1467	7.42333	7.62	6.47667	6.02333	6.46333	7.40667	22.0667	4.95667	7.39
200.03	4.21	2.11333	0.903333	0.833333	13.4333	2.97333	3.87333	5.23333	0.556667	2.46667	5.28333	18.1867	4.43667	0.913333	2.56	1.13333	-0.143333	4.27	15.1067	2.32	1.93667	0.653333	2.40333	2.90333	1.9	25.9767	8.12333	2.68	3.35333	2.19333	3.20333	2.21333	26.7867	2.52333	0.836667	5.32667	4.06	5.67	6.90333	30.83	5.59	6.35333	5.01667	4.45333	6.25667	5.74	21.1	3.52	5.63667
200.408	5.53667	2.7	2.05667	2.49333	14.87	3.87333	4.94	5.71333	1.84667	3.51	5.53333	19.4533	4.28333	2.39	3.24667	2.44333	2.41667	4.19333	15.9567	2.76333	3.58667	2.09667	4.48	4.67333	3.61	27.3133	10.0933	4.26	5.61333	2.88	4.27333	3.48667	28.7333	3.68	2.21333	3.55667	3.66333	5.19333	5.92667	29.3433	5.59	5.31333	4.00667	4.32667	6.06667	4.64	19.77	2.91333	4.13
200.786	6.04333	3.81667	2.90333	3.30333	15.3467	4.09	5.60667	6.87333	2.44667	3.8	6.67333	19.73	5.6	3.81667	4.27	4.32667	2.43	6	17.9967	2.91333	5.11333	2.87	4.95667	6.82667	5.39	28.17	10.5133	4.85	5.99	3.79333	5.2	4.85667	28.08	4.27	4.10333	2.9	3.32667	4.73	6.44	28.58	4.67667	5.37	3.47	3.13333	6.95667	3.89667	19.1567	3.10333	4.53
201.163	5.48	4.02333	2.27	3.31667	15.7	4.25667	4.21	5.69	1.96667	3.63333	5.87667	19.1667	4.82333	3.13333	4.44	4.39	2.73	4.29	16.0767	2.06333	4.09	1.97	4.68333	5.54333	5.65667	27.8533	8.87667	3.88	5.71	3.20667	4.75333	5.08333	27.9967	4.15333	3.03667	3.62	5.53	6.05667	7.41667	29.6733	5.25	7.13	4.98333	3.64667	7.17	5.87333	19.4933	4.27	6.50667
201.541	5.05333	5.92	3.20333	4.16667	16.8067	5.95	5.46333	5.11333	2.27667	3.84667	6.48333	19.8633	5.32667	4.47333	6.58667	5.82333	5.11	4.74333	16.7467	2.71667	4.99	3.4	5.24	7.49667	6.81	28.7033	11.3767	4.80667	6.18333	4.47	6.00333	5.23	27.7733	4.08667	3.76667	5.02	6.93667	6.70333	7.95667	30.81	6.28667	7.97667	6.25333	5.46333	8.29	6.37	20.5967	5.48333	6.72333
201.919	5.84333	6.44333	5.05667	5.61	17.1567	7.25667	4.48333	5.14	2.74333	5.17667	7.35333	19.5733	5.74667	5.14667	7.42667	7.06667	5.85667	5.13	17.2067	3.64667	5.68	4.75667	5.29	7.54	7.92	29.2333	12.2033	5.98333	8.02667	5.27667	7.3	6.1	27.9433	4.91667	4.97	7.09333	7.99667	7.71667	9.38667	31.1767	6.21333	8.30333	7.39333	6.02333	8.42	7.28	21.1567	6.55	7.40333
202.296	5.10667	6.62667	3.56333	4.41	16.4	6.70333	3.29	4.16333	2.18667	5.64333	7.55333	18.6833	5.58667	4.22667	7.80333	6.48333	4.17667	5.06667	17.3167	3.30667	4.69	3.99333	4.31333	6.25	6.67333	27.8133	10.9467	5.55667	6.43667	4.67667	6.18	6.80667	27.79	4.06333	4.02	8.92667	8.25667	7.73333	9.41667	32.3633	6.25333	8.01667	7.25333	6.80333	7.91333	7.26333	22.7167	7.73667	7.38333
202.674	5.96	6.16667	4.95	4.52	16.8967	7.41667	2.48667	4.18667	2.22	6.65	8.17	19.5567	5.47	4.60667	8.28667	6.57667	5.52333	5.36	16.11	3.72	4.50667	3.87333	5.2	5.59	5.75333	28.1067	11.0033	5.62667	7.74333	5.49333	6.44333	6.31	28.7867	4.25667	4.71333	9.23	8.24667	6.68	9.09	32.19	6.35333	8.18667	7.26333	6.41	6.84333	7.81	21.5633	6.63333	7.37333
203.052	6.00333	5.07	4.98	4.08	16.61	7.08667	3.41333	4	1.32333	6.47	7.3	19.7333	5.37333	5.10667	8.56	6.61667	4.93333	5.76333	17.2233	3.98	4.22333	5.36667	5.95667	5.53667	4.85333	28.0133	10.8067	5.92	6.86333	5.88667	5.78667	5.20333	28.15	4.01667	4.69	9.70667	7.48333	5.64667	8.67667	30.5767	6.69	8.37667	6.94333	7.18667	6.53	6.72333	21.0833	7.90333	6.28333
203.429	6.29	2.64333	5.09333	3.63	15.07	6.26	1.58667	4.56	1.08333	5.83	6.80333	18.4167	4.68333	3.86333	8.04333	5.88	3.94	6.04	16.26	2.62667	3.56333	4.49667	4.62	4	3.24333	26.6767	8.25	5.19667	6.20333	4.87	4.92667	5.41	27.7933	2.90333	4.34667	8.72	7.48	5.22333	8.87667	30.6567	6.53333	7.40333	7.54667	7.11	5.84333	5.40667	20.2533	8.23	6.12667
203.807	5.72	2.33	4.38333	2.89333	14.77	5.59667	2.57667	5.34	0.71	4.84	6.51667	18.3667	4.64	3.90333	8.11	5.29667	3.44333	5.70333	16.72	1.38333	3.85667	3.89667	5.23	3.66667	3.24333	26.7267	7.07667	4.56667	5.17667	5.1	4.73667	4.68333	27.9267	2.64	3.79667	8.05667	6.66667	4.91333	8.58333	29.75	7.31333	7.32333	6.96333	7.08333	5.55333	6.08667	19.7867	8.01333	6.76
204.184	4.03	0.85	4.19667	2.48667	12.7267	4.75	1.28667	4.23	-0.0533333	3.05333	5.51	17.3033	3.14667	3.39667	6.00667	3.99333	2.91667	3.79667	15.5867	0.983333	2.70667	2.82667	3.33	2.41667	2.17	25.4633	6.07667	3.07333	4.26667	3.87333	2.97333	2.81667	26.9833	1.76333	3.00333	7.10667	5.41667	3.69	8.81333	29.1733	6.96333	6.93667	7.06333	6.29	5.28	6.35667	19.8733	7.24667	6.21667
204.561	3.05	0.896667	2.78667	2.09667	11.0367	2.35333	1.21	3.24	-0.413333	1.86333	3.94333	15.3167	2.42333	2.51	5.15	2.99667	0.513333	2.01333	14.29	-0.0133333	1.11667	2.30667	1.43333	1.79667	1.76	23.8167	5.15333	0.856667	2.43	2.15	2.54667	1.82	25.6467	0.753333	1.95667	5.67333	3.17333	2.50667	7.25	28.0533	5.54667	5.52333	5.85667	5.13	3.8	5.02667	18.8133	6.80667	4.39333
204.939	4.87333	2.52667	3.64667	4.51	11.32	3.02667	2.80667	4.85	1.95333	3.7	6.17	16.8033	3.40333	3.40333	6.16667	4.04	2.18	3.26667	16.5233	0.62	3.44	2.98	2.61333	3.51667	2.67667	25.9733	7.41	2.2	3.40667	3.78667	4.14667	3.93	26.6633	2.42333	3.66667	5.69	3.13333	3.26333	7.75	28.7633	6.15333	6.03333	6.61667	5.11	4.43667	5.49333	20.5933	5.59333	5.46333
205.316	5.45667	4.42667	3.85333	5.16667	12.3833	3.81	4.36333	4.78667	2.75667	4.82	6.92667	17.45	3.66333	3.98667	7.42	4.54667	3.16333	4.49333	17.1967	2.40333	4.05667	3.32	4.59667	4.59	4.18667	26.5767	9.45	3.38	3.96667	5.42667	5.04333	4.9	27.8133	4.52333	4.26333	7.20333	2.27333	3.85667	7.71	28.8733	6.24667	5.95333	7.02667	5.37	5.56333	7.81	21.8767	5.74	6.65667
205.694	4.23667	4.06667	3.07333	3.57333	10.89	3.17	2.70667	3.49667	1.92667	3.95667	5.24	16.11	2.67	2.05	6.58333	3.62333	1.77333	3.83	15.32	1.65333	2.52	2.30667	2.74333	3.95333	2.44667	24.9	7.93333	2.61333	3.19333	4.76333	3.54	4.32	26.56	4	2.90667	6.89	3.16333	3.46667	7.65333	29.58	6.43667	6.25	6.74333	5.83667	5.45	6.83333	22.2267	5.57667	6.38
206.071	5.47	5.79333	4.01	4.49667	12.2833	4.11333	4.11667	5.86667	2.80667	5.49333	5.85667	17.2833	3.63667	3.07	8.01	5.12667	2.25333	6.45667	16.2333	2.93667	4.57667	4.4	4.84667	6.07	3.98	27.1233	8.35333	4.67333	4.93	6.65667	5.27333	5.43333	27.3733	4.36	3.81	7.24667	4.46333	4.04667	7.47667	29.6433	6.35667	7.9	7.35	6.16	6.07	7.03667	21.2733	5.26667	6.99667
206.448	4.77	5.59	3.14	4.36667	12.28	4.72667	3.76667	5.15	2.3	4.00667	5.51667	17.4167	3.34667	2.58333	7.24333	4.21333	2.75667	6.38333	16.0733	3.04667	4.31667	3.82333	4.91667	5.46333	4.39667	26.7967	8.38667	5.87333	4.68667	6.04667	3.61667	5.68333	27.8	3.56667	3.01	9.29333	6.48333	5.76333	9.18333	31.3433	7.87333	9.28333	8.09	7.22333	6.98	8.57667	23.4167	5.35	8.43333
206.825	3.83	4.89667	3.21333	3.53667	11.56	3.89	3.54667	4.32667	1.04333	3.2	4.52333	17.1333	2.09667	1.95333	6.59667	4.07	2.17667	6.12	14.07	3.54	3.13333	3.03333	3.08	4.58	3.92333	25.81	6.87667	5.22667	4.58333	5.35667	2.84	4.62333	26.6733	2.58667	1.99333	8.80333	5.94	5.57	9.03	30.7833	7.36667	8.64667	7.82667	7.44667	6.35667	8.28	22.8933	5.54	7.85333
207.202	3.12	3.68667	2.36333	2.73	11.09	3.58	2.69333	3.54333	-0.233333	2.10667	3.39	16.1667	2.95333	2.12667	5.64	3.08667	1.14667	4.63	12.8633	2.95	2.59333	3.29333	1.62333	2.66667	3.06333	24.5867	5.40333	3.84667	4.17333	4.09	1.98	4.10333	25.54	1.58	1.32	8.18	6.06667	5.48667	9.05333	30.06	7.18	8.54333	7.01667	6.83667	5.97333	7.51	21.2767	5.79	7.04667
207.58	3.61	2.77333	1.87	3.89	11.5333	2.78	3.39667	3.60667	-0.2	2.26	4.52667	16.4	2.80667	2.00667	5.25	2.66	1.56333	4.71667	13.44	2.62333	3.21667	2.62667	2.28	3.07667	3.83	24.79	5.89667	2.97	5.23333	4.22667	1.83	3.93	25.7633	1.51667	1.48667	8.70667	6.05333	6.58	9.80333	29.6967	7.04	8.32667	7.73	6.72	6.56667	8.07333	21.3733	6.40333	6.71
207.957	2.62667	1.94	1.04667	4.02	11.9033	1.58667	2.47333	2.62667	-0.696667	1.24667	3.42	15.46	2.6	1.03333	4.59	1.79	1.63	3.39667	12.8067	1.44667	1.99333	1.90667	1.42667	1.96	2.78667	22.44	6.54667	1.66	3.98	2.65	1.11667	3.67	25.1433	0.92	1.62667	8.50667	4.75	6.05	8.68	29.42	6.39667	6.05333	6.57667	6.7	5.93667	7.95333	20.86	5.85333	5.90333
208.334	2.11	0.743333	0.46	2.63333	11.2067	0.656667	1.81333	2.54333	-0.996667	1.02	2.36667	14.67	2.04333	0.883333	3.97333	1.09	0.93	3.06333	12.8933	0.31	1.42333	2.16	0.556667	0.516667	2.21667	21.9933	5.77667	1.06	3.49333	2.96333	1.44667	2.05	24.03	0.623333	1.27	7.73333	4.82667	5.87667	7.81667	28.82	5.37667	5.37333	7.07333	6.57	6.52667	6.88667	20.1033	6.95	5.75
208.711	2.54667	2.22333	1.08	3.25333	11.87	2.32333	1.77333	3.39333	0.573333	2.15667	3.12333	15.37	4.19	1.94667	5.26	1.60333	1.6	3.57667	13.52	0.576667	2.79333	3.38667	1.70333	1.00333	2.21	21.5167	7.06333	2.09333	4.61333	4.04	2.33	2.67333	25.2833	1.37333	1.96333	6.72333	5.02	5.00333	6.55667	29.1433	4.19667	3.95333	5.78	4.65	6.03	6.12	18.8733	5.68333	4.33
209.088	3.96667	2.87333	2.01667	4.21	11.8667	2.43333	3.25667	4.45333	1.55	3.67	4.45333	16.1733	4.18667	2.43333	6.18667	2.87333	2.96	4.86	14.3133	0.95	4.23667	4.02667	3.30333	3.24667	3.44333	22.7667	8.67333	4.32667	5.38	5.08	3.01667	3.53667	25.87	2.32	2.57667	6.87	5.34333	5.21	6.15333	30.44	4.66	4.81667	6.66667	5.36333	5.96667	5.69667	18.8233	5.27	4.16333
209.465	3.03667	2.75667	1.80333	3.20667	10.4267	2.40333	1.73333	3.86	1.49	3.09	3.38333	15.6567	3.49	2.34	5.76333	2.51667	2.42667	4.52	13.1367	0.06	3.03333	4.26667	3.38333	2.66	2.29	22.2567	7.93	4.26333	3.87333	4.05333	2.43667	3.21	24.55	1.25333	2.08667	6.47	5.09333	4.43667	5.82333	30.8267	4.36333	4.59667	6	5.05333	5.45333	5.15333	18.76	4.11667	3.56
209.842	4.5	3.24667	2.76333	3.49667	9.84667	3.17333	2.81	4.12	2.10333	3.89333	4.76	15.3133	4.48667	2.62333	6.33667	2.97667	2.94	5.41	13.2067	0.936667	4.26333	4.16667	4.37667	3.16667	3.02	22.8267	8.23333	4.69667	4.52667	4.94667	2.81667	3.51333	24.67	2.75333	2.99667	5.03333	4.98333	4.04	5.99	29.9433	3.73	4.36667	5.71	4.16667	4.79667	3.29333	18.4167	3.77	2.70667
210.219	5.35	3.63667	3.37333	4.13333	10.06	4.12333	3.07	4.10667	2.31	4.83	5.45333	15.8767	4.93	2.37	6.74	3.29667	3.08667	5.41667	13.07	1.88	5.10333	4.45667	4.64	4.09667	2.57333	22.76	8.49	4.72667	5.04333	5.10667	3.14333	4.51	24.2267	3.7	4.01	4.07667	3.79667	3.61333	5.56	29.8433	2.76333	3.37	4.67333	3.42667	4.21667	2.78	17.8033	2.82333	1.93333
210.596	4.82	3.06333	2.55333	3.66333	9.32333	3.18667	2.28667	3.37667	1.57667	3.46	5.01	14.61	3.61667	1.69333	5.66667	2.23333	2.25333	5.09333	12.45	1.03667	3.52	2.83333	3.8	3.49	2.33	21.91	7.60333	3.67667	4.49333	3.45667	2.12	3.69	22.4033	2.93333	2.88333	4.6	3.61333	3.83	5.93	29.6067	3.38333	4.09333	4.90333	4.69	4.04	3.22	17.66	3.35	2.78
210.972	4.84667	3.85667	2.89667	4.35667	9.94333	4.08333	2.33667	4.13667	2.65	3.54	5.03333	14.9033	3.80667	2.33	6.16667	2.45	2.00333	5.74	13.01	1.65	3.61333	3.19667	3.75333	3.84667	2.50333	21.0233	7.54	3.97667	4.93	3.72667	2.83	4.42333	21.9067	3.07667	3.15	4.20333	3.21667	3.54667	6.55333	28.3433	2.42	3.46	4.10667	4.24667	3.63	2.98	17.58	2.71	2.38667
211.349	5.11667	3.42333	3	4.53333	9.88333	4.11333	2.82333	3.93	2.23	3.44333	5.17667	14.4433	4.24333	2.47333	6.43333	2.63667	1.81667	5.52333	12.8367	1.85333	3.63	3.45	3.03667	3.58333	2.51	20.6633	7.5	3.92667	4.97667	3.17	2.96667	4.57667	21.8367	2.91667	3.41	4.53	3.26	3.69667	6.70333	28.21	2.98667	3.86667	4.41	4.69333	3.54667	3.11333	17.3367	3.39	3.21333
211.726	5.1	3.69	2.89667	4.57667	9.79667	4.34333	3.07667	4.00667	2.79	3.42	5.31667	14.92	3.99333	3.33667	7.13	2.94667	1.93	5.81667	12.59	1.81333	3.31667	3.63333	2.55667	3.99667	2.6	21.02	7.90667	4.11667	5.19667	3.55	3.46	4.14333	21.0533	2.90667	3.36	5.22	3.59667	3.82667	6.84667	28.09	3.60667	3.92333	4.21667	4.65333	3.67	4.11	17.3767	3.82667	3.8
212.103	5.27667	3.73667	3.29333	4.79333	9.38	4.09333	3.53667	4.22333	3.09	3.40667	5.57333	14.8167	4.46333	3.45	6.92	3.34667	2.30667	6.25333	12.2667	2.17667	3.39	3.83667	3.21333	4.42	3.10667	20.7767	7.90333	4.12	5.74333	3.66333	3.54333	4.37667	20.9967	2.56333	3.21	5.97	4.28	4.36333	7.21333	27.6467	5.05667	4.94667	4.44333	5.24	3.88667	4.84667	17.2733	4.27	4.14667
212.479	5.32667	3.77	3.24667	4.50667	8.85333	4.08667	3.66333	4.26333	2.61333	3.82333	5.58667	14.7333	4.47333	3.59	6.82	3.69333	2.56667	6.06333	12.0667	2.07667	3.81	4.48	3.59	4.35	3.70667	20.6433	8.21	4.52	5.32	4.03333	4.06667	4.45	21.1933	2.84333	3.51	5.61	3.71667	3.89	6.60333	26.69	4.42333	4.39333	4.26667	4.23333	3.64667	4.42333	16.54	3.94667	3.84
212.856	4.92667	3.19	2.77	4.09667	7.45	3.47333	3.05667	3.44333	2.03	3.31	5.26	14.1233	4.32667	3.15333	6.12667	3.19667	2.26	5.12667	11.3233	1.51333	3.22333	4.10333	3.47333	3.61333	3.10667	20.5567	7.65	3.85667	4.60667	3.32	3.57	3.80333	20.7067	2.69667	3.00333	5.64667	3.67	3.92	6.09333	26.31	4.85333	4.72333	4.25	4.29333	3.88667	4.78333	16.4133	4.21667	3.87
213.233	5.48333	3.86333	3.26	4.47333	7.54	3.88667	3.47667	4.06	2.68667	3.86667	5.58333	14.53	4.49333	3.51	6.42	3.30667	2.99333	5.47667	11.3933	1.94	3.93667	4.45333	4.27	3.96	3.52	20.66	8.2	4.68667	5.07667	3.99667	4.19	4.15667	20.94	3.46333	3.42	5.18	3.23333	3.67667	5.53	25.8167	4.43333	4.22	3.74667	3.9	3.42333	4.31	15.57	3.77667	3.2
213.609	5.15333	3.87	3.50333	4.57	6.91667	4.08	3.38667	4.02333	2.49333	3.81	5.36667	14.2833	4.37333	3.09	6.17667	3.23	3.10667	5.29	11.2467	1.97667	3.93667	4.71333	4.53667	3.58	3.58333	20.2167	7.86333	4.60333	4.80333	3.82667	4.17	4.42667	20.8433	3.65333	3.40667	5.38	3.13333	3.79	5.57333	26.0233	4.17	4.46333	4.15	3.90667	3.7	4.19	15.4	3.86667	3.43667
213.986	4.96	3.87667	3.24	4.64333	6.44	4.26333	3.24333	3.98667	2.56	3.79333	5.29667	14.0433	4.15333	3.23333	6.67333	3.07667	3.25333	5	11.19	1.92667	3.89	4.61667	4.29	3.44333	3.60667	20.1967	7.77667	4.65333	4.44667	3.68333	4.37	4.45333	20.7467	3.66333	3.15333	4.96	2.55333	3.02333	5.02333	25.47	3.38	3.78	3.82	3.42333	3.13333	3.69667	15	3.32667	2.86333
214.362	5.03333	3.84	3.29667	4.7	6.25333	4.45333	3.34	4.15667	3.00667	3.75333	5.18333	13.83	4.22333	3.16	7.01	3.02333	3.44333	5.03	11.0533	2.17333	3.91	4.66333	4.28667	3.53	3.37333	20.2367	7.65667	4.78333	4.53667	3.81	4.21333	4.79667	20.3867	3.62667	3.34333	4.83	2.64667	3.00667	4.97333	25.6433	3.46667	3.81	3.83333	3.51	3.11667	3.69667	14.8933	3.13667	2.70333
214.739	4.95	3.94667	3.35333	4.69333	6.21	4.6	3.46667	4.46333	2.90667	3.93	5.25	13.8833	4.22333	3.31333	7.27	3.06667	3.67	5.15667	10.8633	2.46667	4.00333	4.71333	4.15	3.46333	3.26667	20.0033	7.84667	5.04667	4.66	4.05	4.16333	4.84333	20.2733	3.59	3.52667	4.80333	2.61667	2.82333	4.90667	25.7767	3.50333	3.54	3.96667	3.42	2.94667	3.66667	14.59	3.09667	2.80333
215.115	4.54333	3.59667	2.93	4.41667	5.69667	4.31667	3.03	4.04667	2.61	3.70333	5.06	13.45	4	2.98667	7.02333	2.86333	3.33	4.91333	10.6033	2.31667	3.58	4.55	3.72667	2.98333	3.02333	19.4533	7.63667	4.53333	4.25667	3.73667	3.91667	4.61	19.6333	3.16333	3.36333	5.05667	2.68667	2.78667	4.98333	25.8767	3.53333	3.58333	4.04	3.48667	3.26667	3.81667	14.68	3.24333	2.98333
215.492	4.52333	3.31	2.65333	4.08667	5.34333	3.99333	2.81	3.91333	2.45	3.5	4.93667	13.3133	3.84	2.95333	6.91333	2.64667	3.14667	4.64	10.3133	2.21667	3.36333	4.31	3.49667	2.75	2.88333	18.9967	7.36667	4.45667	4.02	3.56	3.69	4.30333	19.1367	2.85667	3.09	5.08667	2.8	2.78	5.04333	25.7633	3.69667	3.71	4.08667	3.70667	3.05667	4.01	14.6467	3.15667	2.8
215.868	4.59333	3.49	2.81	4.00333	5.34667	4.04	2.91667	4.03667	2.58667	3.58333	4.92333	13.4167	3.85667	3.07333	6.86333	2.8	3.19667	4.73333	10.3367	2.25333	3.44667	4.42333	3.57	2.84667	2.89333	18.6933	7.45	4.51667	4.18333	3.72	3.67	4.3	18.7267	2.92667	3.39333	5.51333	3.19	3.12	5.33667	25.8033	3.9	4.15333	4.36667	4.01667	3.46333	4.44333	14.7833	3.53	3.16333
216.244	4.34667	3.20667	2.64	3.74667	4.95	3.72667	2.57667	3.79333	2.29667	3.29	4.7	13.1467	3.61333	2.97333	6.62	2.54667	2.87667	4.37333	9.91667	2.02	3.22333	4.23	3.33	2.65	2.7	18.0633	7.25	4.16667	3.88667	3.46333	3.43333	3.97	18.2	2.63667	3.13333	5.63333	3.24	3.11	5.40333	25.5067	3.94	4.06	4.26	4.08667	3.35	4.44333	14.7033	3.57333	3.19
216.621	4.36667	3.21	2.6	3.71333	4.71333	3.66667	2.59667	3.67667	2.32	3.21667	4.57	12.9067	3.50333	2.88667	6.43333	2.45	2.72	4.33667	9.80667	1.97333	3.33667	4.21667	3.32	2.83	2.77	17.93	7.06667	3.95667	3.81333	3.34	3.54667	3.80333	17.8033	2.58333	3.13	5.69333	3.32667	3.23667	5.41667	25.0933	3.83333	4.15333	4.18667	4.14	3.41667	4.42333	14.6767	3.55333	3.18
216.997	4.47	3.33667	2.62333	3.83333	4.61667	3.68	2.73333	3.81333	2.47333	3.24	4.62667	12.9533	3.58333	3.00333	6.48	2.51667	2.78667	4.41667	9.78667	2.08	3.47333	4.19667	3.43	3.00667	2.80667	17.8167	7.06333	4.08	3.83667	3.50333	3.6	3.78667	17.7467	2.68667	3.16	5.65	3.28667	3.21	5.32333	24.6667	3.83333	4.13	4.26333	4.1	3.20333	4.42333	14.52	3.52333	3.06333
217.373	4.5	3.34667	2.65	3.86	4.58	3.7	2.72667	3.85333	2.55	3.36667	4.63	12.7833	3.61333	3.06	6.46333	2.55333	2.79333	4.42	9.71333	2.05	3.43333	4.25333	3.43667	3.17667	2.84667	17.7767	7.01667	4.05667	3.94667	3.55	3.60667	3.85	17.68	2.69667	3.25667	5.53667	3.19667	3.09667	5.17667	24.3833	3.70333	3.91333	4.10333	3.93	3.07667	4.25333	14.3833	3.4	3.01333
217.749	4.54667	3.39	2.64667	3.91667	4.55667	3.65333	2.78667	3.85667	2.59	3.41667	4.69	12.6333	3.64	3.07333	6.51333	2.54	2.85333	4.46	9.66667	2.09667	3.43333	4.26	3.45	3.19	2.89667	17.7567	7.01	4.11667	3.9	3.58	3.56667	3.88	17.7033	2.72667	3.28333	5.47333	3.17	3.18667	5.20333	24.2267	3.79	3.85333	4.13333	3.87667	3.07	4.26667	14.29	3.39667	2.98
218.126	4.54667	3.43667	2.63333	3.97333	4.43333	3.71	2.82667	3.82667	2.61333	3.47667	4.68667	12.5567	3.67333	3.07333	6.47	2.54	2.89333	4.46333	9.64667	2.11333	3.44333	4.28333	3.50333	3.17	2.85667	17.7467	6.97333	4.16667	3.88667	3.56333	3.61	3.88	17.6267	2.79	3.29667	5.49667	3.10333	3.24	5.15667	24.1033	3.72667	3.9	4.15667	3.89	3.16667	4.31	14.2967	3.40667	2.96667
218.502	4.59667	3.41667	2.61667	3.97	4.46333	3.74	2.81	3.82	2.67	3.49	4.67667	12.5467	3.72333	3.09333	6.53333	2.58	2.94667	4.50667	9.62667	2.09333	3.41667	4.29333	3.53333	3.13333	2.87333	17.6833	7.04	4.24333	3.82667	3.62333	3.62	3.94333	17.6567	2.81333	3.29333	5.45667	3.03	3.21333	5.11333	23.9333	3.70667	3.84333	4.12667	3.89333	3.15667	4.26333	14.15	3.41333	2.92667
218.878	4.56667	3.41	2.69333	3.95667	4.43333	3.77	2.84333	3.87667	2.66	3.53333	4.67	12.4433	3.73667	3.11	6.51667	2.58333	3.00333	4.43	9.57667	2.09	3.41333	4.34	3.55	3.14333	2.91667	17.6367	7.00667	4.25333	3.91	3.60667	3.59667	3.98	17.54	2.80667	3.30667	5.42	3.01667	3.21333	5.13667	23.7567	3.64667	3.81667	4.07333	3.88	3.17	4.26333	14.0267	3.40333	2.98667
219.254	4.55333	3.44333	2.70667	3.96	4.41333	3.82333	2.9	3.83667	2.64	3.57667	4.65	12.4533	3.77667	3.11333	6.52333	2.58667	3.03	4.43333	9.58333	2.12667	3.38667	4.35333	3.51667	3.12667	2.84	17.54	7.03333	4.28	3.87	3.59667	3.64667	4.00667	17.4433	2.82	3.26	5.37	2.98667	3.23	5.10667	23.5467	3.62333	3.80667	4.06333	3.86667	3.20667	4.22667	13.86	3.45333	2.96
219.63	4.46333	3.34667	2.60667	3.89333	4.28	3.74333	2.74	3.76667	2.53333	3.49333	4.54667	12.3367	3.7	3.03	6.41667	2.47333	2.92333	4.33	9.44667	2.01667	3.30333	4.30333	3.45333	3.04333	2.74333	17.36	6.92333	4.21333	3.74667	3.48333	3.60667	3.95	17.29	2.71667	3.18333	5.22667	2.87667	3.07667	4.98333	23.2333	3.5	3.68667	3.89667	3.75333	3.05	4.04667	13.6633	3.33	2.88333
220.006	4.44	3.31333	2.57	3.86	4.25	3.70667	2.73333	3.79333	2.53667	3.47	4.51667	12.2633	3.69	2.96333	6.40333	2.45667	2.92667	4.33667	9.40667	2.00667	3.27667	4.26667	3.41667	3.02667	2.78	17.2767	6.91	4.17667	3.78667	3.48333	3.59	3.92333	17.24	2.67333	3.13667	5.13	2.88	3.03333	4.97	22.93	3.45667	3.59	3.82	3.71667	2.98	3.99	13.5433	3.25667	2.84
220.382	4.34333	3.24333	2.51667	3.81667	4.16667	3.62667	2.66333	3.75667	2.50333	3.42333	4.48333	12.11	3.63	2.90667	6.30667	2.42	2.83333	4.25	9.31667	1.98667	3.17333	4.24333	3.34333	2.95333	2.74667	17.12	6.84	4.11667	3.80667	3.40667	3.53667	3.84667	17.1233	2.65333	3.09	5.07	2.87333	3	4.93	22.69	3.42	3.53	3.78	3.61333	2.88667	3.97333	13.4833	3.18	2.82
220.758	4.31667	3.22333	2.49	3.74333	4.12333	3.58667	2.67333	3.71333	2.50667	3.37333	4.46333	11.9833	3.6	2.88667	6.30333	2.41333	2.77333	4.23667	9.24667	1.97	3.12667	4.21333	3.30667	2.95	2.75333	17.0033	6.82333	4.08667	3.74	3.35333	3.53	3.85	17.0133	2.62333	3.08333	5.04667	2.85	2.97	4.87333	22.4433	3.41	3.51	3.74333	3.56	2.85667	3.92333	13.4067	3.15	2.74667
221.134	4.35333	3.25333	2.49	3.74667	4.12667	3.58333	2.69333	3.78667	2.56333	3.36667	4.5	11.8933	3.62667	2.92333	6.32667	2.45333	2.77333	4.27667	9.23667	2.01667	3.17667	4.24667	3.4	2.98667	2.82	17.0067	6.85333	4.13	3.79	3.37667	3.57	3.86333	17.0233	2.65	3.14667	5.01	2.83333	2.96	4.83	22.18	3.41333	3.49	3.72	3.55	2.82	3.86333	13.3267	3.09	2.73333
221.51	4.36	3.24333	2.5	3.68	4.1	3.59333	2.74333	3.78667	2.57	3.36	4.48333	11.79	3.62667	2.90333	6.27667	2.50667	2.78667	4.27	9.19	2.02	3.14667	4.21333	3.42	2.97667	2.82	16.9233	6.85667	4.13	3.81333	3.37667	3.56333	3.82333	16.9467	2.65333	3.09667	4.95667	2.81	2.90667	4.75333	22.0233	3.35333	3.41	3.66333	3.50667	2.81333	3.79333	13.1933	3.03	2.65667
221.885	4.37	3.23333	2.52667	3.69667	4.12667	3.58667	2.76	3.77667	2.57	3.34333	4.49	11.7267	3.63	2.93667	6.23	2.52	2.79667	4.26667	9.19	2.02	3.12667	4.23	3.41	3.00667	2.8	16.8633	6.83	4.13	3.80333	3.35667	3.55	3.82333	16.9167	2.68667	3.09	4.94333	2.79	2.90333	4.70333	21.91	3.34333	3.40667	3.65667	3.46333	2.78667	3.78	13.1033	3.03	2.66333
222.261	4.38667	3.22333	2.52667	3.69	4.12333	3.60333	2.77	3.75	2.59	3.32333	4.48333	11.6867	3.60333	2.92	6.22667	2.53	2.82	4.24	9.16	2	3.13	4.20667	3.42	3.00333	2.79	16.7633	6.79	4.13667	3.78	3.36	3.52	3.81667	16.8533	2.67333	3.06	4.87	2.71667	2.83	4.66667	21.78	3.28	3.34	3.59333	3.46	2.76333	3.69	12.9833	3.00333	2.61667
222.637	4.38333	3.20333	2.50667	3.71	4.12	3.62667	2.74667	3.75667	2.59667	3.34667	4.47	11.6633	3.62333	2.92333	6.18	2.54	2.84667	4.24	9.16333	2.02667	3.13	4.21333	3.38667	2.99333	2.76667	16.7133	6.77333	4.11667	3.78667	3.40333	3.53333	3.79667	16.86	2.69333	3.03333	4.83667	2.73667	2.82667	4.66	21.6733	3.27333	3.33667	3.61333	3.46	2.77667	3.69667	12.9133	3.01	2.67
223.013	4.31333	3.14	2.46667	3.70333	4.04667	3.56	2.71	3.68	2.53	3.29667	4.41333	11.5767	3.59	2.86667	6.11667	2.46667	2.81667	4.16667	9.07333	1.96	3.07667	4.15667	3.32333	2.93667	2.70333	16.56	6.69333	4.07667	3.69333	3.36667	3.48333	3.77333	16.77	2.63333	2.95667	4.81333	2.70667	2.80333	4.62	21.5833	3.23667	3.33	3.59333	3.44333	2.75333	3.71667	12.8367	3.00333	2.66
223.388	4.26333	3.11	2.48333	3.73333	4.03	3.55667	2.71	3.66	2.54667	3.26333	4.41667	11.5067	3.57667	2.85333	6.11333	2.43333	2.80667	4.13333	9.02667	1.96	3.08333	4.16	3.28667	2.91667	2.71333	16.4667	6.64667	4.03667	3.65667	3.37333	3.48333	3.76333	16.7	2.63667	2.97667	4.79667	2.7	2.80667	4.61	21.4633	3.23667	3.35667	3.62333	3.46	2.74	3.69667	12.8367	3.02333	2.67
223.764	4.25333	3.13333	2.48333	3.73333	3.99333	3.55	2.70333	3.67333	2.56333	3.29333	4.40333	11.4367	3.57667	2.86333	6.11667	2.43333	2.81667	4.11	8.99	1.98667	3.12	4.15667	3.32667	2.90333	2.73333	16.39	6.66	4.06333	3.63	3.41	3.51	3.76333	16.6267	2.62	3.00667	4.72667	2.66333	2.78	4.56	21.31	3.22333	3.33333	3.59667	3.40667	2.74333	3.67	12.7833	3	2.63
224.14	4.22667	3.14	2.50667	3.7	3.96	3.51667	2.71333	3.68333	2.56333	3.3	4.40667	11.3967	3.59333	2.89333	6.1	2.41667	2.82	4.11333	8.94667	2.01	3.12	4.15333	3.33667	2.89667	2.72667	16.3633	6.64667	4.03333	3.59667	3.38667	3.53	3.77667	16.5867	2.62667	3.01667	4.73667	2.68	2.78667	4.53	21.2033	3.23333	3.32667	3.57667	3.39	2.73	3.69	12.7433	2.99333	2.62333
224.515	4.15333	3.11333	2.49	3.64667	3.91	3.45333	2.66333	3.62667	2.52333	3.23	4.31667	11.31	3.51667	2.85	6.05	2.36	2.75667	4.06	8.87667	1.95333	3.05333	4.09	3.30333	2.87333	2.67667	16.2333	6.58333	4	3.54667	3.30667	3.46667	3.71333	16.4767	2.58667	2.98	4.71667	2.64	2.78333	4.5	21.12	3.19	3.30667	3.53	3.39	2.7	3.65667	12.7233	2.95	2.57333
224.891	4.14333	3.09667	2.45333	3.59333	3.90667	3.44	2.62667	3.60667	2.50333	3.2	4.26667	11.2567	3.46	2.85	6.01333	2.35333	2.73667	4.04	8.82	1.95333	3.04	4.06	3.26333	2.84	2.66333	16.18	6.54333	3.93667	3.55667	3.28667	3.42	3.66333	16.3867	2.58333	2.97	4.72	2.65667	2.81	4.52333	21.0467	3.21667	3.32667	3.55333	3.39	2.71333	3.66	12.7	2.95333	2.58667
225.266	4.13	3.07333	2.41	3.55	3.84667	3.4	2.61	3.58333	2.46333	3.17333	4.22	11.2	3.44333	2.82333	5.97333	2.33	2.71	3.99333	8.77	1.95333	3	4.01	3.24667	2.83	2.62667	16.14	6.50667	3.90333	3.55333	3.23333	3.4	3.65333	16.3067	2.53667	2.93	4.73667	2.67333	2.82333	4.53333	20.9933	3.22333	3.33667	3.56333	3.39333	2.72333	3.69	12.6733	2.93333	2.58667
225.642	4.10667	3.04333	2.39333	3.52333	3.82667	3.38333	2.59	3.53333	2.42667	3.13333	4.19	11.1667	3.42	2.79667	5.96	2.31333	2.64333	3.98	8.70333	1.92	2.96667	3.96333	3.20667	2.8	2.59	16.0533	6.46333	3.85	3.53667	3.2	3.35333	3.63333	16.22	2.52	2.89	4.76667	2.66333	2.84333	4.56667	20.9433	3.22	3.37333	3.58667	3.41667	2.72	3.67	12.6033	2.95	2.59
226.017	4.10667	3.04667	2.4	3.53	3.83	3.38667	2.58333	3.54	2.41667	3.14	4.17	11.1533	3.41	2.78667	5.93667	2.33	2.65333	3.96667	8.70667	1.92	2.95333	3.95667	3.20333	2.80667	2.57667	15.97	6.46667	3.85333	3.55	3.21	3.34667	3.62667	16.1767	2.52	2.89333	4.73667	2.67	2.86	4.56333	20.8667	3.22333	3.4	3.61333	3.39333	2.74	3.65333	12.55	2.96	2.59333
226.393	4.10667	3.02333	2.37667	3.52	3.8	3.35333	2.57667	3.54333	2.39667	3.13	4.17667	11.09	3.41667	2.78667	5.95	2.33667	2.63667	3.93333	8.68	1.93333	2.94	3.94333	3.21	2.79667	2.56667	15.9033	6.45333	3.84667	3.54333	3.19333	3.35333	3.63333	16.1033	2.51	2.89	4.73333	2.65667	2.83333	4.55	20.77	3.23	3.39	3.59333	3.37333	2.71	3.64	12.48	2.94333	2.58333
226.768	4.07333	2.98333	2.36333	3.50333	3.76	3.33333	2.56667	3.53333	2.39333	3.11333	4.16	11.0467	3.41	2.74333	5.91333	2.32667	2.61333	3.92	8.66667	1.91333	2.93	3.91667	3.20333	2.76333	2.57	15.7967	6.44	3.84	3.53333	3.17333	3.34	3.6	16.0133	2.5	2.86333	4.68667	2.62667	2.80333	4.53333	20.68	3.18333	3.35	3.55667	3.34333	2.69333	3.61	12.4033	2.91333	2.56667
227.143	4.06	2.98333	2.36333	3.5	3.76	3.32333	2.55667	3.53	2.39	3.12333	4.13667	11.0133	3.39333	2.75333	5.89333	2.31333	2.60667	3.92333	8.63667	1.9	2.93	3.92	3.19333	2.75	2.55	15.71	6.42	3.83667	3.50667	3.17333	3.30333	3.58667	15.9333	2.51667	2.85667	4.68333	2.60667	2.79333	4.53	20.55	3.19	3.33333	3.56333	3.33667	2.70333	3.61	12.3333	2.93667	2.58
227.519	4.05333	3.01333	2.36	3.49333	3.76333	3.32333	2.57	3.54667	2.42	3.13	4.13667	10.9967	3.40333	2.76333	5.88667	2.32	2.62667	3.91333	8.64	1.92333	2.92667	3.95	3.19	2.77667	2.57667	15.6533	6.42333	3.85333	3.51667	3.16667	3.31667	3.57667	15.8867	2.51667	2.86667	4.66333	2.6	2.77667	4.49333	20.4367	3.18	3.30333	3.53667	3.31	2.68333	3.58	12.3033	2.93333	2.59667
227.894	4.00333	2.95	2.30333	3.45333	3.71333	3.30667	2.53	3.49333	2.38333	3.05667	4.10333	10.8933	3.35667	2.71	5.83333	2.26667	2.57667	3.86333	8.55333	1.89	2.88667	3.91	3.13333	2.71333	2.54	15.5567	6.35667	3.80667	3.47333	3.12667	3.26667	3.52667	15.73	2.47	2.82	4.64667	2.57333	2.76667	4.47667	20.2967	3.17333	3.27667	3.52333	3.32667	2.65667	3.56667	12.26	2.92	2.58333
228.269	3.96667	2.93	2.29667	3.44	3.71	3.3	2.52333	3.48	2.37	3.03333	4.07	10.8733	3.33333	2.70333	5.79667	2.24333	2.58	3.85333	8.49	1.86	2.88667	3.92333	3.1	2.68667	2.53333	15.4867	6.32667	3.78667	3.44667	3.12333	3.26333	3.48667	15.67	2.44333	2.8	4.63667	2.56333	2.75333	4.47	20.2067	3.17	3.26333	3.53333	3.29667	2.67667	3.54333	12.2267	2.92667	2.58
228.644	3.98	2.96	2.31333	3.45	3.69667	3.30333	2.52333	3.5	2.36667	3.04	4.09333	10.86	3.34	2.71333	5.78333	2.23667	2.57333	3.83667	8.45	1.87333	2.87667	3.92333	3.07667	2.7	2.51333	15.4267	6.32	3.79333	3.44	3.11	3.25333	3.5	15.62	2.44667	2.80333	4.63333	2.56	2.74667	4.43667	20.08	3.16333	3.24667	3.50667	3.28667	2.64	3.53333	12.18	2.92667	2.54
229.02	3.95333	2.93333	2.30333	3.44	3.68333	3.29333	2.51	3.47667	2.34667	3.02333	4.10333	10.85	3.33333	2.69667	5.79	2.22667	2.56667	3.81333	8.42	1.86333	2.85	3.89333	3.05	2.69	2.5	15.36	6.33333	3.78333	3.44	3.09	3.26333	3.48	15.5667	2.43	2.79667	4.57667	2.53	2.72333	4.39667	19.99	3.12667	3.20667	3.44333	3.24333	2.59333	3.49	12.0967	2.88333	2.49667
229.395	3.92	2.87	2.27	3.4	3.63667	3.25667	2.46667	3.42	2.3	2.98	4.04667	10.7667	3.29667	2.66333	5.75	2.18333	2.53	3.77667	8.34667	1.83	2.82333	3.84667	2.99	2.64667	2.43667	15.27	6.28333	3.73667	3.39667	3.03667	3.20333	3.43	15.5033	2.39667	2.74333	4.57667	2.53333	2.71	4.39333	19.8933	3.12333	3.2	3.46	3.24	2.59	3.49667	12.0433	2.86333	2.48
229.77	3.93333	2.89333	2.28667	3.41333	3.65333	3.27667	2.48667	3.43333	2.30333	3	4.03667	10.76	3.31667	2.68667	5.76	2.20667	2.56	3.79667	8.36	1.83	2.82667	3.86	3.00333	2.69	2.43333	15.28	6.32	3.76667	3.39667	3.05	3.20667	3.44	15.53	2.39667	2.78	4.56333	2.52333	2.70667	4.37667	19.8233	3.09667	3.19	3.45	3.21	2.57667	3.45667	11.99	2.83	2.45667
230.145	3.96	2.91	2.31	3.41333	3.67333	3.28333	2.50333	3.43333	2.32	3.04	4.05667	10.7633	3.34	2.72	5.78333	2.23	2.57	3.81	8.38667	1.85667	2.83667	3.85	3.01333	2.70667	2.43333	15.2633	6.33667	3.79667	3.40667	3.06667	3.20333	3.47	15.5067	2.42333	2.78333	4.52333	2.51	2.70333	4.33	19.7333	3.06667	3.16	3.41333	3.19667	2.54	3.43667	11.9467	2.81	2.42
230.52	3.91667	2.9	2.29	3.37333	3.66	3.27667	2.49	3.39	2.32	3.02333	4.01	10.7167	3.32	2.69667	5.78	2.21333	2.56	3.77667	8.34	1.83333	2.82667	3.83	3.01333	2.69	2.42	15.1967	6.32333	3.78667	3.36667	3.05	3.18667	3.44333	15.4667	2.39667	2.75667	4.49667	2.52333	2.68333	4.34	19.67	3.06333	3.16333	3.40667	3.19333	2.56333	3.44	11.9067	2.8	2.44
230.895	3.90333	2.88667	2.27667	3.34333	3.65333	3.27333	2.49333	3.38333	2.31333	3.01	3.96333	10.6667	3.29667	2.68667	5.74333	2.2	2.54333	3.76333	8.29333	1.83	2.8	3.81667	3	2.66	2.41667	15.1433	6.29333	3.78	3.33667	3.04667	3.17	3.41333	15.44	2.38	2.74333	4.51	2.55	2.68667	4.34	19.61	3.07667	3.19	3.42	3.21	2.58667	3.45	11.9033	2.81667	2.46
231.27	3.9	2.90333	2.31	3.35	3.67	3.29	2.51	3.41	2.33333	3.03667	3.98333	10.6667	3.29667	2.71	5.75	2.23333	2.57	3.77333	8.29333	1.84	2.81	3.80667	3.02333	2.68	2.45333	15.1033	6.30667	3.80667	3.34333	3.06333	3.2	3.42667	15.4033	2.4	2.76	4.47333	2.52	2.66333	4.30667	19.51	3.06	3.17	3.38	3.19667	2.56333	3.42333	11.89	2.8	2.43667
231.645	3.88667	2.89333	2.29667	3.32	3.64667	3.25	2.49333	3.37333	2.34	3.02667	3.97667	10.6333	3.28333	2.69	5.72667	2.21667	2.55	3.74333	8.25	1.84333	2.81333	3.76333	3.00333	2.64333	2.44333	14.9933	6.27333	3.79333	3.33333	3.03	3.18	3.41	15.33	2.39	2.72667	4.45	2.51	2.64667	4.29333	19.4333	3.05	3.16667	3.34333	3.19	2.55667	3.44	11.85	2.79333	2.44333
232.02	3.84333	2.86667	2.27333	3.3	3.62	3.23667	2.46667	3.35333	2.31667	2.99667	3.95	10.5767	3.24	2.64333	5.69333	2.19	2.52667	3.71333	8.19333	1.82333	2.77667	3.73	2.98	2.63	2.42667	14.92	6.25	3.76	3.32	2.99667	3.16	3.38667	15.2867	2.36667	2.7	4.43	2.49667	2.63667	4.29667	19.3467	3.04333	3.16667	3.35	3.17667	2.54333	3.41333	11.8067	2.78333	2.43667
232.394	3.84333	2.84	2.27333	3.30667	3.62667	3.24333	2.48	3.36667	2.32333	2.98667	3.94333	10.5367	3.23333	2.65	5.67667	2.18667	2.52667	3.73667	8.18	1.83667	2.78	3.72667	2.97	2.63333	2.43333	14.85	6.24333	3.76	3.33667	2.99333	3.16333	3.36667	15.2267	2.38333	2.71667	4.42333	2.48	2.60667	4.26	19.2533	3.03667	3.14333	3.33	3.16	2.52	3.37667	11.7633	2.77333	2.41333
232.769	3.84667	2.83333	2.27	3.31667	3.61333	3.23333	2.47333	3.35667	2.33	2.97333	3.93333	10.5067	3.22667	2.65	5.67	2.18667	2.52333	3.72667	8.18333	1.83667	2.79667	3.71333	2.95333	2.62667	2.43667	14.7767	6.23333	3.76333	3.33333	2.98333	3.14667	3.36	15.1867	2.4	2.70667	4.40667	2.46	2.59333	4.22333	19.18	3.00667	3.11333	3.30667	3.11333	2.49	3.36333	11.7067	2.74	2.39
233.144	3.81667	2.81333	2.22667	3.28667	3.59	3.22333	2.45333	3.33	2.3	2.95333	3.9	10.45	3.21333	2.62333	5.63333	2.15333	2.5	3.70667	8.13667	1.81667	2.78333	3.69667	2.92667	2.59667	2.40667	14.6833	6.18667	3.75333	3.32333	2.96333	3.11333	3.34	15.0967	2.38	2.68	4.40667	2.45	2.58333	4.2	19.0933	2.98667	3.08333	3.28667	3.10333	2.47	3.34	11.64	2.71667	2.37333
233.519	3.78333	2.78333	2.21	3.27667	3.56333	3.22	2.44333	3.32667	2.27667	2.93667	3.88	10.4067	3.19	2.61667	5.61667	2.13	2.48	3.69333	8.08	1.79667	2.76667	3.67667	2.89667	2.57333	2.40333	14.59	6.18667	3.74667	3.31	2.95	3.11	3.33667	15.0367	2.36667	2.65333	4.38	2.43667	2.57333	4.17667	19.03	2.99333	3.07667	3.29333	3.09	2.44667	3.32	11.6	2.71333	2.36333
233.893	3.77333	2.76333	2.19	3.24667	3.53667	3.21	2.44667	3.31667	2.26667	2.92333	3.87	10.37	3.19667	2.60667	5.59	2.11	2.47333	3.69	8.05	1.78333	2.77	3.66667	2.87667	2.54	2.38667	14.5233	6.18	3.75333	3.29333	2.95	3.09667	3.30667	14.9667	2.36333	2.63667	4.36667	2.44	2.55667	4.15	18.9267	2.99333	3.07333	3.27	3.08333	2.45	3.32	11.56	2.71	2.35333
234.268	3.74333	2.76333	2.19333	3.23	3.51333	3.17667	2.43333	3.28333	2.24667	2.92333	3.86	10.3367	3.18	2.6	5.57333	2.11667	2.47	3.65667	8.01667	1.77667	2.75	3.64667	2.83667	2.52333	2.38667	14.47	6.16667	3.75333	3.28	2.94667	3.07333	3.32	14.93	2.34	2.61	4.33	2.41	2.55333	4.13667	18.8567	2.97667	3.06667	3.25667	3.06667	2.44333	3.31667	11.52	2.68667	2.33667
234.643	3.71333	2.75333	2.17	3.20333	3.47667	3.16	2.40333	3.26667	2.22667	2.90333	3.85	10.3067	3.17333	2.59667	5.55333	2.09333	2.43667	3.63333	7.97667	1.75667	2.72667	3.63	2.80333	2.49333	2.35667	14.4067	6.16	3.74333	3.26667	2.92333	3.05667	3.30667	14.8467	2.31333	2.59667	4.30333	2.39	2.54333	4.13	18.75	2.96333	3.05667	3.25333	3.07	2.42667	3.29333	11.4667	2.68333	2.32667
235.017	3.71	2.74667	2.18	3.21333	3.48333	3.15667	2.41333	3.28333	2.24	2.90333	3.87	10.3067	3.18	2.60667	5.56333	2.1	2.44667	3.64	7.98	1.77	2.73	3.63667	2.80667	2.51	2.37	14.3933	6.20667	3.76667	3.27667	2.93667	3.06	3.31	14.8467	2.33	2.60667	4.27667	2.39333	2.52667	4.14667	18.6833	2.96	3.06667	3.25667	3.05667	2.41667	3.3	11.4333	2.68	2.32667
235.392	3.72333	2.75667	2.20333	3.22333	3.51	3.16	2.41667	3.29667	2.25	2.91667	3.85667	10.3033	3.19667	2.61333	5.56333	2.11	2.45667	3.63667	8	1.79333	2.73667	3.64667	2.82	2.52333	2.40667	14.3867	6.21	3.8	3.29333	2.95667	3.07333	3.31	14.8133	2.34667	2.62667	4.29333	2.38667	2.53	4.13	18.59	2.94	3.06667	3.24	3.05	2.43	3.28667	11.3933	2.67667	2.29667
235.766	3.71667	2.78	2.21	3.24667	3.53	3.19333	2.41667	3.31333	2.25	2.93	3.86667	10.3	3.20667	2.64333	5.58333	2.11333	2.46	3.63667	7.99	1.80667	2.75333	3.66667	2.82	2.52333	2.43	14.3567	6.23333	3.82667	3.31	2.95667	3.08333	3.32	14.8	2.36333	2.63667	4.28667	2.38	2.52333	4.13333	18.5133	2.93667	3.06	3.24667	3.04	2.42667	3.28333	11.3533	2.66667	2.30333
236.141	3.72333	2.77333	2.20667	3.25	3.54667	3.21	2.42333	3.32	2.25333	2.93	3.85	10.2967	3.23	2.64667	5.58333	2.09333	2.46667	3.64667	7.99667	1.82667	2.77333	3.65333	2.83667	2.51667	2.43667	14.3167	6.26	3.83	3.3	2.95	3.08333	3.31	14.7567	2.37	2.64333	4.30667	2.40333	2.52667	4.15	18.4333	2.95333	3.07667	3.27	3.05333	2.44333	3.27	11.3367	2.69667	2.33
236.515	3.73667	2.78333	2.22	3.25667	3.58667	3.25	2.45667	3.33333	2.26667	2.94667	3.86	10.2767	3.24	2.65667	5.59667	2.11	2.49	3.65	7.99333	1.84	2.79	3.65667	2.84667	2.54	2.46	14.31	6.29667	3.86333	3.31	2.96	3.1	3.32333	14.7433	2.38333	2.65333	4.28667	2.39	2.51	4.12667	18.3467	2.97667	3.08667	3.25333	3.04667	2.45333	3.26	11.2933	2.7	2.31667
236.89	3.73	2.75667	2.19667	3.24333	3.56667	3.23	2.43667	3.29333	2.25333	2.93667	3.83333	10.2533	3.23667	2.64	5.58333	2.08	2.46333	3.62333	7.96333	1.83667	2.78	3.61667	2.82	2.52	2.44333	14.2667	6.28333	3.84667	3.28333	2.93667	3.08	3.30333	14.6967	2.36	2.64667	4.29333	2.39	2.54	4.12	18.28	2.98667	3.09667	3.25667	3.05333	2.47667	3.27667	11.27	2.71667	2.33667
237.264	3.71	2.74333	2.17333	3.22667	3.54	3.23333	2.43667	3.28667	2.25	2.92667	3.82333	10.2133	3.22333	2.63	5.56667	2.06	2.45667	3.61333	7.91667	1.82333	2.76333	3.6	2.79333	2.49667	2.41333	14.22	6.29667	3.82667	3.24333	2.91667	3.05	3.28333	14.66	2.36	2.63333	4.27	2.39667	2.51	4.13333	18.2133	2.98	3.08333	3.26333	3.05	2.47333	3.26667	11.2333	2.71	2.35
237.639	3.70667	2.72667	2.16	3.21333	3.53	3.21667	2.43	3.26333	2.25667	2.92	3.78667	10.19	3.21667	2.60333	5.54	2.04333	2.45667	3.59667	7.92333	1.82333	2.75	3.57333	2.77333	2.49667	2.4	14.1633	6.30333	3.82667	3.22333	2.9	3.04	3.28	14.6367	2.34	2.63	4.26333	2.41333	2.52667	4.13667	18.1433	2.99667	3.07667	3.26	3.05	2.48333	3.28	11.22	2.70333	2.34667
238.013	3.69	2.70667	2.14	3.19333	3.5	3.21667	2.39667	3.25	2.25333	2.89333	3.78	10.1567	3.20333	2.59333	5.52667	2.03667	2.43333	3.58333	7.89	1.79333	2.74333	3.55333	2.75333	2.49	2.39333	14.1367	6.32	3.84333	3.20667	2.88667	3.03	3.27	14.6167	2.34	2.62	4.24	2.39333	2.52333	4.12	18.0433	2.98333	3.07	3.24667	3.03333	2.47	3.26	11.19	2.69	2.33667
238.387	3.70333	2.71	2.14333	3.2	3.50667	3.20667	2.40333	3.25	2.26667	2.89667	3.79	10.15	3.20333	2.61333	5.51667	2.04667	2.44667	3.59333	7.89	1.80667	2.75667	3.55333	2.76	2.49	2.39333	14.1	6.33667	3.86667	3.21333	2.89333	3.03	3.27667	14.6467	2.36	2.63333	4.24333	2.41333	2.54333	4.13667	17.9933	2.97667	3.07333	3.26	3.04	2.47	3.27333	11.2067	2.69333	2.35667
238.761	3.72	2.73	2.17333	3.20667	3.52667	3.24333	2.43	3.28	2.27667	2.91333	3.80333	10.14	3.23	2.63333	5.52333	2.07333	2.47	3.61	7.90333	1.83	2.77	3.57667	2.78333	2.51	2.42	14.06	6.37	3.90667	3.23333	2.91333	3.06	3.29667	14.6633	2.39	2.64667	4.22	2.40667	2.53667	4.12	17.9467	2.98	3.06667	3.24667	3.04333	2.45667	3.23667	11.2	2.66333	2.33
239.136	3.72667	2.74333	2.18	3.19667	3.54333	3.25667	2.43667	3.27667	2.27667	2.91	3.82	10.1267	3.23667	2.64667	5.52333	2.08667	2.47333	3.62	7.91333	1.84	2.78667	3.58	2.79333	2.52667	2.43667	14.04	6.38667	3.94	3.25	2.91333	3.06333	3.31333	14.68	2.4	2.66	4.22333	2.40333	2.55667	4.10667	17.91	3	3.07	3.25333	3.04667	2.45667	3.24	11.2067	2.67333	2.32667
239.51	3.74667	2.74667	2.19	3.2	3.54	3.27333	2.44333	3.28667	2.28333	2.90667	3.83667	10.0967	3.25667	2.65667	5.51667	2.10333	2.47667	3.61667	7.91	1.85333	2.8	3.59	2.8	2.53667	2.44667	14.0333	6.4	3.95333	3.24667	2.92	3.07	3.32	14.69	2.42667	2.66667	4.20667	2.37333	2.52333	4.09667	17.88	2.98667	3.06667	3.23	3.02667	2.44667	3.21667	11.1967	2.66333	2.31667
239.884	3.73667	2.73667	2.19333	3.19	3.53667	3.28	2.45	3.28	2.27667	2.92	3.83667	10.0767	3.26667	2.66333	5.52	2.10333	2.48333	3.6	7.91	1.86667	2.79667	3.59	2.8	2.53333	2.43667	14.0267	6.40333	3.97667	3.25333	2.91333	3.06	3.32333	14.7067	2.41667	2.66	4.21	2.37	2.52	4.08333	17.85	2.99	3.07667	3.22	3.02333	2.43	3.22	11.1767	2.66333	2.31333
240.258	3.70667	2.74333	2.19667	3.19333	3.50333	3.28667	2.45	3.28	2.26667	2.91	3.83	10.0667	3.28	2.66667	5.50667	2.09667	2.47667	3.60333	7.91	1.87333	2.8	3.59	2.79	2.52	2.43667	13.9967	6.39333	3.99333	3.25333	2.90333	3.07667	3.32	14.68	2.43333	2.64	4.19667	2.34333	2.49667	4.06667	17.8233	2.98333	3.06333	3.18333	3.01667	2.41	3.19333	11.1367	2.64667	2.29333
240.632	3.68667	2.71667	2.17333	3.19333	3.48333	3.28	2.44	3.26333	2.25333	2.88333	3.81667	10.04	3.26	2.65667	5.48333	2.07667	2.46667	3.57667	7.88333	1.86667	2.8	3.57	2.76667	2.49667	2.42333	13.9833	6.38	3.98333	3.22667	2.89	3.05333	3.29667	14.66	2.40333	2.62333	4.17333	2.31667	2.44667	4.04667	17.75	2.96333	3.05667	3.15667	2.98333	2.38667	3.17333	11.0967	2.64	2.28
241.006	3.67	2.71667	2.17667	3.2	3.46333	3.27667	2.44	3.26333	2.25333	2.9	3.80667	10.04	3.27	2.65667	5.46333	2.08333	2.46	3.55333	7.88	1.87667	2.79333	3.55667	2.74667	2.48	2.41333	13.9567	6.38333	3.98333	3.21667	2.89	3.06	3.27667	14.64	2.39	2.60667	4.15333	2.29667	2.44333	4.02333	17.6833	2.94333	3.04667	3.14	2.96	2.35333	3.17	11.0567	2.61667	2.27333
241.38	3.62333	2.68	2.16	3.18	3.45	3.26667	2.42667	3.24667	2.22667	2.87667	3.77667	10.0433	3.23	2.64667	5.43333	2.06333	2.44667	3.54333	7.83	1.85333	2.78	3.51	2.73333	2.46333	2.39667	13.92	6.37333	3.97333	3.20667	2.86	3.03333	3.25	14.5933	2.36333	2.57	4.15	2.29	2.45	4.00333	17.6433	2.94	3.05333	3.13667	2.95333	2.33333	3.16	11.0167	2.62333	2.26667
241.754	3.65	2.70667	2.18	3.20333	3.47	3.29	2.45333	3.28333	2.26	2.88	3.80667	10.0733	3.24	2.67333	5.44	2.09333	2.47333	3.58	7.85	1.88667	2.81	3.51	2.75667	2.47	2.43	13.91	6.39667	4.01333	3.23667	2.87667	3.04667	3.27333	14.5767	2.38	2.59333	4.13667	2.28	2.45	3.99	17.6067	2.96	3.04333	3.12333	2.94	2.32333	3.16	10.9767	2.61	2.26
242.128	3.66333	2.7	2.17	3.18333	3.46667	3.29667	2.44	3.27	2.24667	2.86667	3.79667	10.0867	3.23	2.65333	5.43	2.08667	2.46667	3.56333	7.81	1.88667	2.80667	3.48	2.74333	2.47333	2.43	13.8733	6.40333	4.00667	3.22	2.87	3.02	3.25	14.5133	2.35333	2.58667	4.13333	2.28	2.44667	3.97333	17.5633	2.95	3.03333	3.14	2.91667	2.32333	3.15333	10.9567	2.59667	2.26
242.502	3.65333	2.72	2.17333	3.18333	3.47	3.31333	2.45	3.27	2.25333	2.86333	3.79	10.1033	3.24667	2.67667	5.42	2.09333	2.48	3.56667	7.80667	1.89667	2.81	3.47667	2.73667	2.47667	2.44333	13.8367	6.42333	4.02667	3.22667	2.87333	3.01333	3.26	14.4633	2.36667	2.58	4.17	2.32	2.48	3.99667	17.57	2.98	3.06667	3.15667	2.95667	2.35333	3.18667	10.9633	2.61667	2.28667
242.876	3.65	2.70667	2.16	3.17	3.48	3.31667	2.44	3.26	2.25	2.83667	3.79667	10.11	3.23667	2.66	5.42	2.09	2.48333	3.56667	7.79333	1.89	2.8	3.47	2.74333	2.46667	2.44333	13.8167	6.42333	4.04	3.22	2.85333	2.99333	3.26	14.42	2.37333	2.57667	4.15333	2.32333	2.46	3.98333	17.5133	2.98	3.08	3.13333	2.94333	2.36667	3.18	10.9533	2.62333	2.29
243.25	3.64667	2.70333	2.12	3.15667	3.47333	3.31667	2.45333	3.25	2.25	2.82667	3.79333	10.0967	3.25	2.65667	5.41667	2.07333	2.47333	3.55667	7.78	1.90667	2.8	3.45667	2.72667	2.45333	2.44333	13.7833	6.41667	4.05	3.21667	2.85	2.99667	3.26667	14.3633	2.37667	2.57	4.15333	2.32333	2.45333	3.98667	17.45	2.97333	3.06667	3.14333	2.93667	2.38	3.17667	10.9367	2.62667	2.28333
243.623	3.63333	2.69	2.10333	3.14	3.48333	3.30667	2.45	3.23	2.23333	2.82333	3.77667	10.0767	3.26	2.64667	5.40333	2.06333	2.46333	3.53	7.74333	1.9	2.79	3.45	2.71	2.45333	2.43333	13.7367	6.41	4.06	3.19333	2.84333	2.99667	3.24667	14.3067	2.38333	2.57	4.14	2.33	2.45667	4	17.3833	2.95333	3.07667	3.15333	2.94667	2.39667	3.18	10.9333	2.62667	2.29
243.997	3.61667	2.68	2.10667	3.13333	3.48333	3.30667	2.45333	3.22333	2.22667	2.82667	3.78667	10.0633	3.26333	2.65	5.39333	2.05667	2.46333	3.53667	7.73667	1.89667	2.77667	3.44333	2.70667	2.44333	2.43333	13.7167	6.4	4.06	3.19667	2.84333	2.98333	3.24333	14.28	2.38333	2.56667	4.15	2.34333	2.47333	4.01333	17.3333	2.97333	3.10667	3.15667	2.95	2.40333	3.19	10.9133	2.65667	2.31667
244.371	3.62667	2.66667	2.10667	3.12667	3.49	3.30333	2.46333	3.22333	2.23667	2.82667	3.78	10.0367	3.26667	2.64	5.39333	2.06	2.45333	3.53667	7.72	1.9	2.78333	3.44	2.71333	2.44667	2.43	13.68	6.4	4.06333	3.20667	2.84	2.99	3.23333	14.23	2.4	2.56667	4.10667	2.31333	2.45333	3.98	17.1967	2.94667	3.07667	3.13	2.92333	2.37	3.16	10.8633	2.63333	2.28333
244.744	3.62667	2.67333	2.11667	3.13667	3.49333	3.30667	2.48	3.22333	2.24	2.82667	3.77333	10.03	3.26667	2.64667	5.38	2.06333	2.44667	3.53	7.70667	1.89667	2.79667	3.42	2.70333	2.45667	2.44333	13.6467	6.38667	4.06667	3.20667	2.85	2.98667	3.23667	14.1933	2.39333	2.56333	4.12333	2.32	2.47333	4.00333	17.1233	2.97333	3.07	3.14333	2.93667	2.37667	3.18	10.8333	2.64333	2.29
245.118	3.65	2.71	2.16333	3.16667	3.52	3.34	2.49333	3.24	2.25333	2.85333	3.78667	10.05	3.30333	2.68	5.39333	2.11	2.48	3.55	7.74	1.91667	2.83333	3.45333	2.72667	2.5	2.47667	13.6267	6.41333	4.10333	3.22333	2.88	3.02	3.25	14.2033	2.41333	2.59667	4.12333	2.33667	2.49667	4.01333	17.0667	2.99	3.09	3.14667	2.93	2.36667	3.18333	10.84	2.65667	2.3
245.492	3.65	2.70667	2.16667	3.16667	3.52667	3.34667	2.48333	3.23667	2.24667	2.85	3.79	10.0267	3.28667	2.67667	5.38	2.10667	2.47	3.54	7.74333	1.92	2.84	3.43333	2.73333	2.50333	2.49667	13.6267	6.42333	4.08333	3.21667	2.87333	3.00333	3.25	14.1967	2.41333	2.58	4.10667	2.32333	2.48667	3.99	16.9767	2.98667	3.07333	3.13	2.91333	2.35667	3.14667	10.81	2.64	2.28333
245.865	3.63667	2.71333	2.15333	3.16	3.55333	3.32667	2.48667	3.25	2.25333	2.84	3.75667	9.98667	3.27667	2.67667	5.36667	2.10333	2.47	3.51333	7.74667	1.92	2.84667	3.44	2.72333	2.50667	2.5	13.62	6.42	4.09333	3.2	2.85667	3.00667	3.24333	14.1733	2.41	2.58	4.10333	2.34	2.46333	3.98333	16.8867	2.97667	3.06333	3.12	2.89	2.35	3.13667	10.8033	2.63	2.26667
246.239	3.65	2.70667	2.15333	3.16	3.58	3.34333	2.48	3.24667	2.24667	2.83667	3.76667	9.98667	3.26333	2.69	5.36	2.10333	2.48	3.52667	7.75333	1.92333	2.86333	3.44667	2.72333	2.51	2.51667	13.6233	6.43	4.1	3.18333	2.86667	3.01333	3.24333	14.1867	2.4	2.58667	4.11	2.35	2.48	3.99667	16.8433	2.98333	3.07667	3.12667	2.89667	2.35	3.14333	10.8033	2.63667	2.27
246.612	3.64667	2.70333	2.14	3.15667	3.59333	3.35333	2.47667	3.23667	2.24333	2.84	3.76667	9.97667	3.24667	2.69	5.34667	2.1	2.48	3.52333	7.76667	1.93	2.86333	3.44667	2.73333	2.50333	2.51667	13.6167	6.42333	4.1	3.17667	2.86667	3.02	3.24667	14.2	2.4	2.59333	4.07667	2.32333	2.45333	3.98	16.8	2.96	3.05667	3.11667	2.86333	2.34667	3.10333	10.7933	2.62333	2.25333
246.986	3.63667	2.67667	2.12667	3.13667	3.59	3.34667	2.47667	3.23	2.25	2.83667	3.74667	9.93333	3.22667	2.68	5.31667	2.06667	2.46333	3.51	7.75667	1.92333	2.84667	3.44	2.71667	2.49333	2.50333	13.6267	6.39667	4.08	3.17	2.85667	3.01	3.23667	14.1967	2.39667	2.58333	4.06333	2.31667	2.42667	3.97667	16.7233	2.95667	3.05333	3.09333	2.88	2.34333	3.09333	10.7733	2.61333	2.24667
247.359	3.61667	2.66333	2.09667	3.11	3.56	3.30667	2.45333	3.20667	2.22333	2.81667	3.71	9.91667	3.2	2.66	5.29667	2.02667	2.42333	3.48	7.74	1.90667	2.81667	3.41	2.67667	2.48333	2.46667	13.6033	6.34333	4.04667	3.14333	2.82667	2.99333	3.20667	14.22	2.35333	2.55333	4.07333	2.31667	2.42	3.98	16.6867	2.93667	3.04	3.09333	2.86667	2.34	3.10667	10.7933	2.61667	2.24667
247.733	3.62	2.66333	2.1	3.11	3.54667	3.32	2.45	3.19667	2.20333	2.81667	3.71333	9.94333	3.19333	2.65667	5.29	2.03333	2.41333	3.48333	7.72667	1.90667	2.81667	3.39333	2.67333	2.46667	2.46333	13.59	6.33333	4.03	3.14667	2.83667	2.99	3.21667	14.2467	2.34333	2.54667	4.04333	2.29667	2.42333	3.97	16.63	2.93333	3.02667	3.07667	2.87333	2.31667	3.1	10.78	2.59667	2.23333
248.106	3.61667	2.66	2.09667	3.10667	3.52667	3.29667	2.44667	3.2	2.20333	2.81333	3.70333	9.91667	3.2	2.66667	5.28333	2.02333	2.40333	3.47333	7.75667	1.90333	2.80333	3.39667	2.66	2.46667	2.47	13.5967	6.30667	4.02333	3.15	2.82667	2.98	3.21	14.2867	2.34333	2.53333	4.04	2.28667	2.40333	3.95	16.5933	2.91	3.01333	3.06667	2.85667	2.31667	3.07667	10.76	2.58333	2.23333
248.479	3.61333	2.64667	2.1	3.09667	3.52667	3.28333	2.44	3.19	2.20667	2.80333	3.69	9.89	3.2	2.66333	5.29	2.03333	2.4	3.46667	7.74333	1.9	2.80333	3.39333	2.65	2.46333	2.46333	13.6033	6.31667	4.02333	3.16333	2.82	2.97667	3.2	14.2933	2.34	2.53667	4.05333	2.3	2.41	3.94333	16.5833	2.91333	3.03	3.06333	2.87333	2.31	3.08667	10.7667	2.57333	2.23667
248.853	3.61667	2.65	2.10333	3.1	3.52667	3.27667	2.44333	3.19	2.19667	2.79667	3.68333	9.89667	3.19	2.67	5.29667	2.05333	2.4	3.46333	7.75333	1.90333	2.80333	3.38333	2.65	2.47333	2.46	13.5967	6.30333	4.03333	3.16	2.81667	2.97667	3.19667	14.3067	2.34	2.52667	4.06	2.30667	2.42333	3.94667	16.5833	2.91667	3.03	3.08333	2.88	2.31	3.09667	10.77	2.58	2.23
249.226	3.62333	2.64	2.12333	3.10667	3.53667	3.29	2.45667	3.2	2.20667	2.81	3.69	9.89	3.2	2.67333	5.3	2.09	2.41	3.48	7.77	1.9	2.82	3.38667	2.67667	2.46667	2.46333	13.59	6.31667	4.04	3.16333	2.83667	3	3.19333	14.3167	2.35333	2.54667	4.05667	2.31333	2.43333	3.93	16.5933	2.92667	3.03333	3.07333	2.88	2.30667	3.09	10.75	2.56667	2.22667
249.599	3.62	2.62667	2.12	3.10667	3.53	3.27333	2.45	3.19333	2.21333	2.80667	3.69667	9.87333	3.20667	2.66667	5.29	2.09333	2.42	3.48	7.78333	1.90333	2.82667	3.38667	2.67	2.48	2.47	13.5933	6.29667	4.04	3.15667	2.82667	2.99667	3.2	14.3433	2.36	2.54333	4.07	2.31333	2.44	3.91667	16.6167	2.93	3.03333	3.07	2.88333	2.32	3.08333	10.7467	2.58667	2.22333
249.972	3.60333	2.62333	2.10333	3.09667	3.51667	3.27667	2.42333	3.18	2.20333	2.79333	3.68333	9.89	3.18667	2.64667	5.28	2.08667	2.40333	3.46	7.77667	1.89333	2.82667	3.34667	2.64667	2.46333	2.45667	13.55	6.28333	4.01	3.15667	2.81333	2.98667	3.19667	14.3067	2.35	2.53	4.09	2.31667	2.45667	3.93333	16.6567	2.95	3.04333	3.08333	2.9	2.32667	3.09667	10.7667	2.59667	2.22667
250.345	3.6	2.61	2.09333	3.09333	3.49667	3.26	2.40667	3.16667	2.19667	2.78333	3.67667	9.88	3.17667	2.61667	5.25667	2.07333	2.38333	3.45	7.78	1.87667	2.80333	3.33	2.63333	2.44667	2.43333	13.5033	6.23667	3.96333	3.12667	2.80667	2.98333	3.17	14.3067	2.33333	2.5	4.08333	2.30667	2.44667	3.91667	16.66	2.93	3.02333	3.07	2.89667	2.31	3.06333	10.76	2.58333	2.2
250.718	3.58333	2.60667	2.06667	3.07667	3.47667	3.23667	2.39	3.16333	2.18	2.76333	3.67667	9.89	3.17333	2.59333	5.23	2.05667	2.37667	3.45333	7.76667	1.86667	2.8	3.32333	2.62	2.41	2.41	13.46	6.20333	3.94	3.11667	2.79333	2.96	3.16333	14.2967	2.31333	2.49667	4.08	2.28	2.44333	3.89	16.6533	2.92	3.03	3.04667	2.87667	2.30667	3.04667	10.7333	2.57333	2.2
251.091	3.59	2.60667	2.05	3.07333	3.46	3.23	2.38333	3.16	2.18667	2.76333	3.68333	9.91	3.16	2.6	5.23	2.02667	2.38	3.45667	7.76667	1.87	2.78667	3.32333	2.60333	2.39333	2.41333	13.4333	6.16667	3.91667	3.13	2.78	2.93667	3.17333	14.28	2.30667	2.49	4.08	2.26333	2.42	3.87	16.6467	2.91	3.02	3.05	2.87333	2.29333	3.03667	10.7167	2.57667	2.20333
251.465	3.59	2.61333	2.04667	3.08	3.45667	3.23	2.37333	3.16	2.19	2.77	3.66667	9.91	3.15	2.6	5.22	2.01667	2.38333	3.45	7.76667	1.87333	2.77	3.32	2.57667	2.38333	2.39667	13.38	6.16667	3.9	3.12333	2.77333	2.93	3.16333	14.2367	2.29667	2.49333	4.07333	2.25333	2.40333	3.87333	16.6533	2.88667	3.01	3.03667	2.86333	2.28333	3.02	10.6867	2.56	2.19667
251.838	3.58	2.59333	2.04667	3.07	3.44	3.21	2.37333	3.15	2.17667	2.76667	3.67	9.91	3.14	2.59333	5.20667	2.01667	2.37667	3.44	7.74	1.87333	2.74333	3.31667	2.57667	2.35333	2.37667	13.3433	6.12	3.88333	3.12333	2.75667	2.91667	3.16	14.19	2.28667	2.49333	4.05333	2.25333	2.39	3.87	16.6533	2.87333	3	3.03	2.86333	2.28	3.01333	10.67	2.55	2.19
252.21	3.57	2.58667	2.04333	3.06	3.43333	3.21333	2.37333	3.15333	2.18	2.75	3.67	9.93333	3.12667	2.6	5.21667	2.01667	2.38	3.44667	7.70667	1.88	2.73667	3.30667	2.56667	2.36	2.37667	13.3033	6.1	3.88667	3.13333	2.75333	2.89	3.15667	14.1333	2.29	2.49	4.05333	2.26333	2.40333	3.86333	16.6667	2.89	3	3.05333	2.86333	2.29	3.03667	10.6733	2.57333	2.21333
252.583	3.56333	2.57333	2.06	3.05667	3.43333	3.20667	2.36667	3.14667	2.17667	2.74333	3.66	9.94667	3.12333	2.60667	5.20333	2.01333	2.38	3.43333	7.69333	1.87333	2.73333	3.29667	2.54667	2.36333	2.37667	13.2667	6.08333	3.86667	3.13667	2.75	2.89333	3.15333	14.0733	2.29	2.47667	4.05	2.27	2.39667	3.85667	16.68	2.87667	2.97333	3.05333	2.85667	2.29333	3.02667	10.65	2.56	2.20333
252.956	3.53667	2.56667	2.05667	3.04	3.43	3.19333	2.35667	3.14	2.17333	2.71667	3.64333	9.93	3.11667	2.57333	5.17333	2.01667	2.37	3.42	7.66	1.86333	2.72	3.27667	2.53	2.34667	2.35667	13.1933	6.05	3.85333	3.12	2.74333	2.88667	3.13667	13.9767	2.27	2.46667	4.04667	2.28667	2.39	3.85333	16.7067	2.87	2.97667	3.05667	2.87333	2.30333	3.03	10.6633	2.57	2.20667
253.329	3.54333	2.56333	2.05667	3.03333	3.42667	3.18333	2.37333	3.13667	2.17	2.71333	3.64333	9.94	3.11	2.56333	5.17333	2.02	2.37667	3.42	7.63	1.86333	2.71333	3.26667	2.54333	2.34333	2.34667	13.1467	6.01667	3.84333	3.13333	2.75333	2.87667	3.13667	13.9033	2.26667	2.46	4.05	2.3	2.4	3.85667	16.7233	2.88	2.99333	3.06667	2.89333	2.31	3.04333	10.6667	2.56667	2.22
253.702	3.54	2.57	2.05333	3.02	3.43667	3.17	2.35667	3.13333	2.19	2.71	3.63333	9.94667	3.1	2.56667	5.16333	2.01333	2.37667	3.43333	7.61667	1.85333	2.70333	3.26333	2.54333	2.35	2.33333	13.1067	6.00333	3.84333	3.13	2.76	2.86667	3.13333	13.8267	2.26333	2.45	4.03333	2.28	2.39	3.82667	16.7067	2.86333	2.98	3.06	2.86	2.29	3.02	10.6267	2.55333	2.21
254.075	3.53333	2.57	2.04667	3.02	3.42333	3.14667	2.35	3.12	2.19	2.72	3.61	9.95	3.10333	2.56	5.14	2.01	2.37667	3.41	7.61	1.85333	2.70667	3.25	2.53667	2.32333	2.31667	13.07	5.98667	3.82667	3.12	2.74333	2.86333	3.12333	13.7633	2.24667	2.45333	4.03	2.26	2.37667	3.81	16.6767	2.85333	2.97667	3.04667	2.85	2.27	3.00333	10.5767	2.52333	2.18333
254.447	3.53333	2.57667	2.03	3.02	3.42	3.14	2.35	3.12	2.19667	2.71667	3.62333	9.96	3.1	2.56667	5.15667	2.02	2.37333	3.41333	7.58333	1.85	2.69	3.23667	2.54667	2.31	2.32	13.0167	5.97667	3.81667	3.11	2.74	2.86333	3.11667	13.7033	2.24667	2.45667	4.01667	2.26	2.36667	3.80333	16.69	2.83333	2.98333	3.03667	2.83333	2.25	3	10.5833	2.52667	2.18
254.82	3.54	2.57333	2.03667	3.02	3.41	3.14	2.34667	3.11667	2.2	2.72667	3.62667	9.98	3.1	2.58	5.15667	2.01667	2.37333	3.40667	7.57667	1.84	2.68667	3.22667	2.54	2.31333	2.31333	12.9667	5.97333	3.80667	3.11	2.74	2.86333	3.11667	13.66	2.25	2.45333	4.00333	2.24	2.36333	3.79333	16.6567	2.82667	2.97	3.01667	2.81333	2.23	2.98	10.55	2.5	2.14667
255.193	3.53667	2.56667	2.03667	3.02333	3.41	3.14	2.34	3.12333	2.19667	2.72	3.62667	10	3.10333	2.58667	5.15333	2.02667	2.36	3.41	7.57667	1.84	2.68667	3.21667	2.52667	2.3	2.31333	12.9433	5.96	3.79667	3.10333	2.72333	2.86333	3.11667	13.6067	2.25	2.45667	4.00333	2.22333	2.34667	3.77333	16.63	2.81667	2.96333	3.01	2.79667	2.21667	2.97333	10.5633	2.5	2.13667
255.566	3.53667	2.57	2.03333	3.02667	3.40333	3.15333	2.35333	3.12333	2.18667	2.72333	3.62667	10.01	3.10667	2.57333	5.15667	2.03667	2.36333	3.40667	7.55333	1.83667	2.69667	3.21	2.51	2.29	2.31	12.91	5.94667	3.78	3.10333	2.72667	2.87667	3.11333	13.5767	2.25	2.46333	3.99667	2.22	2.34333	3.76667	16.62	2.81	2.94667	3.00667	2.80667	2.20667	2.97333	10.56	2.5	2.12667
255.938	3.53333	2.56333	2.03	3.03	3.40333	3.16	2.35667	3.13333	2.17333	2.73	3.63	10.01	3.10333	2.57	5.16	2.04	2.36	3.41	7.54667	1.83	2.68667	3.19667	2.50667	2.29	2.30333	12.8867	5.93333	3.77	3.10667	2.73	2.88	3.11333	13.5367	2.24667	2.45333	4	2.22667	2.34667	3.77333	16.63	2.80667	2.94667	3.00667	2.81333	2.21	2.97	10.5767	2.50667	2.14
256.311	3.54	2.56333	2.02333	3.02667	3.39667	3.15667	2.35333	3.13667	2.16333	2.74667	3.61667	10.0133	3.10333	2.56333	5.15667	2.02667	2.35333	3.41667	7.55667	1.82333	2.69667	3.18	2.49333	2.28333	2.28333	12.8667	5.92	3.77	3.10667	2.72667	2.87333	3.11333	13.5	2.24667	2.46	3.99667	2.22667	2.34667	3.75333	16.5833	2.80333	2.94	2.99333	2.82	2.2	2.96667	10.5667	2.49333	2.13
256.683	3.54	2.56	2.01667	3.03	3.39667	3.15333	2.34667	3.13667	2.16333	2.74	3.61667	10.0167	3.1	2.56667	5.17	2.02333	2.35667	3.42	7.55	1.82667	2.70333	3.18333	2.49	2.27	2.27667	12.8633	5.91333	3.76	3.11333	2.72333	2.86	3.11667	13.47	2.25333	2.45333	4	2.22667	2.34667	3.75667	16.5833	2.81	2.94	3.00333	2.82	2.2	2.97667	10.57	2.5	2.14333
257.056	3.54	2.56333	2.01667	3.03333	3.39	3.16	2.34333	3.13	2.15667	2.74667	3.61333	10.02	3.09667	2.57333	5.17333	2.01667	2.35333	3.43	7.54667	1.82	2.69667	3.18333	2.48333	2.27333	2.27667	12.8667	5.91333	3.75667	3.10667	2.72	2.86667	3.12	13.4567	2.26	2.45333	3.99	2.21333	2.34	3.74667	16.57	2.78667	2.91667	2.98667	2.81333	2.18333	2.96667	10.54	2.48	2.13
257.428	3.53333	2.55333	2.01333	3.03	3.39667	3.14333	2.33	3.12333	2.14667	2.75	3.62	10.0267	3.09667	2.56667	5.18	1.99667	2.34333	3.40667	7.56	1.81667	2.68667	3.17667	2.47667	2.26333	2.27	12.8533	5.90333	3.74667	3.10333	2.71667	2.85333	3.12	13.4533	2.24	2.44333	4.00333	2.23667	2.36	3.77	16.5667	2.79667	2.92667	2.98333	2.81667	2.20333	2.98667	10.5467	2.48667	2.15
257.801	3.56667	2.57333	2.03667	3.05333	3.42333	3.16	2.34667	3.14333	2.17333	2.75667	3.62333	10.0667	3.11667	2.58333	5.21	2.01333	2.35667	3.44	7.57333	1.82667	2.71333	3.19	2.49333	2.26667	2.28333	12.88	5.92667	3.76333	3.11	2.74	2.86333	3.14667	13.48	2.25333	2.45333	4.00667	2.24	2.36667	3.77333	16.5667	2.79	2.93	2.98	2.81	2.20667	2.98333	10.5467	2.49	2.14667
258.173	3.58	2.58	2.04667	3.06333	3.43333	3.17667	2.34667	3.16	2.2	2.75667	3.64	10.1	3.12	2.59333	5.23	2.03	2.36667	3.45333	7.59	1.83667	2.70667	3.19667	2.50667	2.27333	2.29333	12.9133	5.93	3.76333	3.12	2.75	2.87667	3.16333	13.5167	2.26	2.45	4.02	2.23333	2.35667	3.78333	16.5633	2.79	2.92333	2.97667	2.81333	2.21	2.97667	10.56	2.48667	2.14
258.545	3.59333	2.59667	2.06667	3.07667	3.45667	3.19333	2.36333	3.17667	2.21667	2.76667	3.65333	10.1467	3.13	2.60667	5.26667	2.04333	2.38333	3.46	7.61667	1.86	2.72333	3.22	2.52333	2.29333	2.30333	12.9633	5.94333	3.77667	3.14	2.77	2.90333	3.17667	13.57	2.27333	2.46333	4.03667	2.24	2.36667	3.79667	16.5833	2.79333	2.92667	2.98667	2.82	2.21667	2.97333	10.6	2.49333	2.15
258.918	3.62	2.61	2.07333	3.08333	3.48	3.20333	2.37	3.18	2.23333	2.77	3.67333	10.1733	3.14333	2.61667	5.28667	2.05667	2.39667	3.48	7.65	1.87	2.72667	3.22333	2.53	2.29333	2.3	13.0267	5.95667	3.78333	3.15	2.79	2.90667	3.18667	13.6533	2.28	2.47333	4.04667	2.25	2.38333	3.81	16.6133	2.80667	2.94333	2.98667	2.81667	2.22667	2.98333	10.65	2.5	2.15333
259.29	3.63333	2.62333	2.08667	3.10667	3.5	3.22	2.38667	3.20333	2.25333	2.78	3.68667	10.2233	3.15667	2.63	5.31333	2.07333	2.41333	3.50667	7.68667	1.87667	2.73667	3.24	2.54	2.31667	2.31	13.11	5.98333	3.8	3.17333	2.80333	2.93	3.19667	13.7433	2.3	2.48	4.05667	2.24333	2.36333	3.80667	16.6533	2.8	2.94667	2.98667	2.82333	2.22	2.97667	10.7033	2.50333	2.15
259.662	3.64667	2.63333	2.09667	3.11333	3.52333	3.23333	2.39667	3.21667	2.26667	2.80333	3.71333	10.25	3.16667	2.64333	5.33333	2.08667	2.43333	3.52333	7.73667	1.89	2.74333	3.25667	2.54667	2.33333	2.33	13.1667	5.99667	3.81667	3.20333	2.81667	2.95333	3.20333	13.82	2.32	2.5	4.05667	2.23667	2.37	3.82	16.69	2.79667	2.93333	2.99333	2.81667	2.22	2.97667	10.74	2.50667	2.14667
260.034	3.65	2.63667	2.10667	3.12333	3.53	3.23333	2.40667	3.21667	2.25333	2.81333	3.71333	10.2533	3.17	2.64	5.34	2.08667	2.43333	3.52333	7.76333	1.88333	2.75	3.26667	2.54333	2.33667	2.33	13.2333	6.00667	3.82	3.21	2.83333	2.95667	3.20667	13.9	2.32333	2.51667	4.07667	2.24667	2.38667	3.84	16.7567	2.79667	2.94	3.00667	2.81667	2.22667	2.99333	10.7833	2.50667	2.16667
260.407	3.65333	2.64	2.10333	3.13333	3.54667	3.23	2.40333	3.22333	2.24667	2.82667	3.71333	10.26	3.18	2.63333	5.33667	2.08333	2.42	3.52333	7.79667	1.87333	2.74333	3.25667	2.53667	2.32333	2.33333	13.27	6.03	3.81667	3.20667	2.84333	2.95333	3.20667	13.9733	2.32333	2.51333	4.08333	2.26	2.40667	3.85333	16.8	2.80333	2.95	3.02	2.83667	2.23667	3.01333	10.8267	2.51333	2.17667
260.779	3.64	2.63333	2.08667	3.12667	3.54333	3.21667	2.4	3.23	2.23667	2.83	3.7	10.2567	3.17	2.61333	5.34333	2.07	2.41	3.51	7.81667	1.85667	2.73	3.25	2.53	2.31667	2.32667	13.3067	6.03333	3.81	3.20333	2.83333	2.95667	3.19667	14.01	2.31	2.50333	4.11	2.26333	2.42333	3.87333	16.83	2.81	2.96333	3.04333	2.85667	2.25333	3.01667	10.8533	2.52	2.19333
261.151	3.65	2.63333	2.08	3.12667	3.54	3.21	2.39	3.22333	2.23333	2.82333	3.69333	10.2567	3.16667	2.60667	5.34333	2.07	2.40667	3.52	7.83667	1.85333	2.73	3.23667	2.52333	2.30333	2.31333	13.3567	6.04667	3.80667	3.19667	2.83333	2.96	3.19667	14.0667	2.3	2.50333	4.11667	2.27	2.45	3.88	16.8733	2.82333	2.97	3.05667	2.86667	2.26333	3.03	10.8833	2.52333	2.2
261.523	3.64667	2.63333	2.06667	3.12333	3.53	3.2	2.39	3.22333	2.22667	2.82	3.68	10.2733	3.16333	2.6	5.34333	2.05333	2.39667	3.5	7.87333	1.84667	2.72667	3.23667	2.52667	2.29667	2.29333	13.4233	6.05667	3.8	3.17333	2.82667	2.95667	3.19667	14.1333	2.29333	2.49667	4.13	2.28	2.46667	3.9	16.9	2.84667	2.98	3.06667	2.87333	2.27333	3.03667	10.92	2.53667	2.21333
261.895	3.65667	2.64	2.07333	3.13333	3.55	3.20333	2.41	3.24	2.24	2.82	3.69667	10.3067	3.17	2.61667	5.38	2.06333	2.41	3.51667	7.92333	1.85667	2.73667	3.25333	2.52667	2.29667	2.3	13.5067	6.08333	3.81667	3.18667	2.83	2.98	3.21	14.2333	2.3	2.49667	4.13333	2.29667	2.48333	3.91	16.9433	2.85667	2.99333	3.07667	2.89333	2.27667	3.04333	10.95	2.56	2.22333
262.267	3.68	2.65	2.08	3.15333	3.56	3.21667	2.42333	3.24333	2.25333	2.83667	3.72	10.36	3.18667	2.62667	5.43	2.07333	2.43	3.54	7.97333	1.86667	2.75	3.26333	2.53667	2.31333	2.31	13.6	6.11333	3.82333	3.19667	2.84	2.99	3.22	14.3333	2.31333	2.51333	4.14667	2.3	2.47333	3.91	16.98	2.85333	2.98667	3.07667	2.89	2.27	3.04667	10.9767	2.55	2.21333
262.639	3.71	2.66667	2.09667	3.17	3.59333	3.23333	2.44333	3.27	2.27333	2.86	3.75333	10.4	3.20333	2.64667	5.46333	2.09333	2.45	3.56	8.02667	1.89333	2.77333	3.28	2.55333	2.32667	2.33333	13.6733	6.13333	3.85	3.22333	2.87333	3.01667	3.24333	14.4433	2.33333	2.54	4.15333	2.31333	2.48333	3.93	17.04	2.86667	2.99	3.08333	2.9	2.27333	3.05667	11.0267	2.57	2.21333
263.011	3.74	2.68	2.12333	3.19	3.62333	3.25	2.46	3.29667	2.29667	2.88	3.77333	10.4367	3.22333	2.68333	5.49667	2.12	2.47	3.57667	8.08667	1.91667	2.79667	3.32333	2.57	2.34667	2.36	13.73	6.15333	3.87667	3.26	2.9	3.04	3.28	14.5433	2.36667	2.56333	4.17	2.33	2.48333	3.94667	17.08	2.87333	2.98667	3.09667	2.9	2.28667	3.07	11.0633	2.58333	2.21
263.383	3.75	2.68	2.13333	3.19667	3.62333	3.24667	2.46	3.31	2.29333	2.89333	3.79333	10.44	3.23	2.69	5.51333	2.12333	2.46667	3.59	8.09333	1.92333	2.80333	3.32333	2.56333	2.34667	2.36667	13.78	6.16333	3.87667	3.26667	2.90667	3.04333	3.28333	14.6167	2.35667	2.58	4.18333	2.34333	2.49333	3.95333	17.14	2.88	2.99667	3.11	2.92	2.29333	3.08333	11.1033	2.58667	2.21333
263.755	3.76	2.68333	2.13667	3.19667	3.62333	3.25	2.45333	3.32333	2.29667	2.90333	3.79333	10.4667	3.23333	2.69	5.51	2.12333	2.47333	3.59333	8.11	1.91667	2.8	3.31667	2.56333	2.35333	2.36	13.8133	6.18	3.89	3.26667	2.91333	3.03333	3.29333	14.68	2.36333	2.58333	4.19333	2.34667	2.49333	3.96333	17.1833	2.88333	2.99667	3.11667	2.91333	2.30667	3.09333	11.1333	2.6	2.21333
264.126	3.76667	2.69333	2.14667	3.19667	3.63667	3.25333	2.46	3.34333	2.31667	2.91	3.8	10.48	3.23667	2.69667	5.50333	2.13667	2.47667	3.60333	8.12333	1.92	2.81667	3.33667	2.57	2.35667	2.35333	13.8367	6.19333	3.90333	3.28667	2.91667	3.04667	3.31	14.7367	2.35667	2.58	4.20667	2.35667	2.50333	3.97333	17.2267	2.89667	3.01	3.13	2.92333	2.32333	3.09667	11.1733	2.61333	2.22
264.498	3.76667	2.69	2.16333	3.20667	3.63667	3.25667	2.46	3.34333	2.32333	2.91333	3.8	10.4867	3.24333	2.71333	5.51333	2.14	2.48333	3.61333	8.14	1.91667	2.82	3.34333	2.58	2.36	2.35667	13.87	6.2	3.90667	3.29	2.91667	3.05	3.32	14.7867	2.36	2.57667	4.21333	2.36	2.50667	3.98	17.24	2.89	3.02	3.14333	2.92667	2.33667	3.10333	11.1767	2.61	2.22667
264.87	3.76	2.69	2.16	3.20333	3.64333	3.25333	2.45333	3.34	2.31333	2.92	3.78333	10.4933	3.24	2.7	5.52	2.13	2.48	3.61667	8.14667	1.91667	2.80333	3.33	2.58333	2.35333	2.35	13.9	6.20667	3.89333	3.27667	2.92	3.04333	3.31	14.8167	2.35	2.57667	4.20333	2.35333	2.50667	3.97667	17.2533	2.88	3.01333	3.13333	2.92333	2.32	3.08	11.1867	2.59333	2.22
265.242	3.75667	2.69	2.16	3.19667	3.65333	3.26	2.46	3.34667	2.32333	2.92	3.78333	10.49	3.24333	2.71	5.52667	2.12667	2.48333	3.61667	8.17	1.91333	2.80667	3.33333	2.59	2.34333	2.33667	13.9133	6.2	3.9	3.29	2.92333	3.04667	3.31667	14.8533	2.35	2.57333	4.21	2.36	2.5	3.97333	17.2633	2.87667	3.01333	3.13667	2.92333	2.31	3.08	11.1867	2.58333	2.21667
265.613	3.76333	2.70333	2.16667	3.20667	3.66	3.26667	2.46333	3.34333	2.32667	2.93	3.78333	10.4967	3.24333	2.71333	5.53667	2.13	2.48667	3.62667	8.18667	1.92333	2.79333	3.33	2.59	2.34	2.34	13.9233	6.18667	3.88667	3.29	2.92	3.06667	3.31667	14.8833	2.35333	2.58	4.21	2.36	2.5	3.95667	17.24	2.86667	3.01333	3.13	2.91667	2.30333	3.06	11.2033	2.56667	2.21333
265.985	3.76	2.69667	2.16333	3.19667	3.66	3.26333	2.45333	3.33667	2.31333	2.93	3.77667	10.4733	3.23	2.71	5.54333	2.12667	2.48	3.61	8.19	1.91667	2.78	3.30667	2.57667	2.33333	2.32333	13.93	6.17333	3.87667	3.29667	2.92333	3.06667	3.31333	14.8933	2.35667	2.58667	4.21333	2.36	2.51333	3.95667	17.2367	2.87	3.01	3.13	2.92333	2.3	3.06	11.1967	2.57667	2.22333
266.356	3.76	2.69333	2.14667	3.19333	3.65667	3.25667	2.45333	3.33	2.30667	2.93	3.77333	10.4867	3.22	2.69667	5.53333	2.11333	2.47	3.60333	8.20333	1.91	2.78	3.30333	2.56333	2.32	2.31333	13.9233	6.16	3.87667	3.28667	2.91333	3.05667	3.30333	14.9033	2.35	2.58	4.21333	2.34667	2.50667	3.96667	17.2633	2.87	2.99667	3.12	2.91333	2.29333	3.05667	11.1967	2.57333	2.21333
266.728	3.76667	2.69333	2.14667	3.20667	3.66667	3.26667	2.45333	3.34	2.32	2.92667	3.78333	10.4967	3.23333	2.70333	5.54333	2.12333	2.48667	3.60333	8.21667	1.91333	2.79667	3.31333	2.56667	2.32	2.31	13.94	6.15333	3.88333	3.29333	2.92	3.07	3.32333	14.9167	2.36667	2.58333	4.24	2.36	2.51667	3.97333	17.28	2.87667	3	3.12333	2.92667	2.31	3.06667	11.2067	2.58333	2.21667
267.1	3.79	2.70333	2.15667	3.22333	3.68667	3.28333	2.46	3.35333	2.33	2.94	3.79333	10.5333	3.25333	2.71	5.56333	2.13667	2.51333	3.61667	8.25333	1.92333	2.80667	3.33	2.57	2.33667	2.32667	13.9633	6.17667	3.88667	3.31	2.93667	3.08333	3.34	14.9533	2.37667	2.59	4.24	2.36	2.52	3.97333	17.2833	2.87333	3	3.11667	2.92	2.30667	3.06667	11.2267	2.58667	2.21667
267.471	3.78667	2.69333	2.15	3.22667	3.68333	3.27333	2.45333	3.34333	2.33667	2.94333	3.79667	10.5233	3.26	2.70667	5.55667	2.14	2.51	3.61667	8.25667	1.92667	2.80333	3.32667	2.57333	2.33333	2.32	13.98	6.18333	3.88333	3.30333	2.93667	3.07667	3.33667	14.9633	2.37667	2.58333	4.25	2.36	2.52333	3.99	17.3067	2.88333	2.99667	3.12333	2.92667	2.31	3.07667	11.2133	2.59667	2.21
267.842	3.79667	2.70333	2.16	3.24	3.69	3.27667	2.46	3.36	2.35333	2.95667	3.81333	10.5567	3.27667	2.71333	5.57	2.14333	2.52333	3.63333	8.27667	1.94	2.81667	3.34333	2.58333	2.34667	2.33333	14.0133	6.19333	3.89	3.31	2.94333	3.08667	3.34667	14.9967	2.39	2.59	4.24	2.34667	2.52667	3.99	17.3033	2.86667	2.98667	3.12	2.91333	2.30333	3.06667	11.2167	2.58667	2.19333
268.214	3.8	2.70667	2.16333	3.25	3.70667	3.27667	2.46	3.37667	2.36	2.95333	3.82	10.5567	3.29	2.72667	5.59	2.14667	2.53333	3.64667	8.27667	1.93667	2.81333	3.35333	2.57667	2.35	2.34	14.0367	6.19333	3.87	3.32333	2.94667	3.1	3.35	15.02	2.39333	2.59	4.23	2.34667	2.53333	3.97333	17.2767	2.86333	2.99	3.11	2.91667	2.30667	3.06333	11.21	2.58333	2.18333
268.585	3.78667	2.70333	2.16667	3.23667	3.7	3.26	2.45333	3.36667	2.36	2.95667	3.81333	10.5367	3.27333	2.72	5.57667	2.13	2.51667	3.63667	8.26	1.93	2.80333	3.33667	2.56	2.34	2.33667	14.0333	6.19333	3.86333	3.32	2.94	3.09333	3.33667	15.02	2.37667	2.57667	4.22	2.34667	2.51667	3.97	17.2733	2.85667	2.98333	3.10667	2.90333	2.30333	3.07333	11.2033	2.58333	2.19
268.957	3.77	2.69667	2.15667	3.22333	3.68667	3.24	2.43667	3.35333	2.35333	2.94333	3.79333	10.4967	3.25	2.69	5.55333	2.12333	2.5	3.63333	8.23333	1.91667	2.78	3.32	2.55	2.32333	2.32333	13.9733	6.15667	3.84333	3.3	2.92333	3.08333	3.32333	14.9867	2.37333	2.55	4.21667	2.33667	2.51333	3.95333	17.23	2.85	2.96667	3.09667	2.89667	2.3	3.06	11.18	2.58333	2.18667
269.328	3.74667	2.68	2.14	3.19667	3.68333	3.23333	2.42667	3.33667	2.33333	2.93	3.77	10.47	3.22667	2.67333	5.52333	2.09667	2.48333	3.60333	8.21	1.89	2.76667	3.30667	2.52667	2.29667	2.30333	13.9333	6.11667	3.82667	3.29333	2.91333	3.06667	3.31333	14.9667	2.35333	2.53667	4.21333	2.33333	2.51	3.94333	17.2	2.84667	2.96667	3.09	2.88667	2.3	3.04667	11.1667	2.57667	2.18667
269.699	3.72333	2.66	2.12	3.17333	3.67	3.21	2.4	3.32	2.31333	2.91	3.74333	10.41	3.2	2.64667	5.49333	2.07667	2.46667	3.58333	8.17333	1.87	2.74333	3.27	2.5	2.27667	2.28	13.8567	6.09333	3.79667	3.27	2.89333	3.04333	3.29	14.9167	2.33	2.52	4.21333	2.34	2.50667	3.93667	17.14	2.84667	2.96333	3.09	2.89	2.3	3.04333	11.1333	2.57333	2.19333
270.07	3.7	2.65	2.11333	3.16	3.66	3.19	2.38667	3.29333	2.31	2.89667	3.72	10.3567	3.17333	2.62333	5.45333	2.06667	2.44667	3.55667	8.13333	1.86333	2.72	3.24	2.49	2.26333	2.26333	13.7833	6.05667	3.78333	3.25	2.88667	3.02667	3.27	14.8667	2.32	2.51	4.19667	2.33333	2.48667	3.92333	17.0567	2.83333	2.94333	3.08667	2.87	2.28667	3.03667	11.0833	2.56333	2.18333
270.442	3.69	2.64667	2.1	3.14667	3.65667	3.18	2.37667	3.28667	2.29667	2.88	3.69667	10.2933	3.16333	2.61	5.42333	2.06333	2.43667	3.54	8.10667	1.86	2.70333	3.22333	2.48333	2.25	2.24333	13.7267	6.02667	3.77	3.22667	2.87667	3.02	3.24667	14.82	2.30667	2.50667	4.17333	2.33	2.49333	3.90667	16.9367	2.82667	2.94	3.07333	2.86667	2.27667	3.00667	11.0233	2.55667	2.17333
270.813	3.66333	2.63	2.09667	3.13667	3.66	3.17	2.37	3.26333	2.28333	2.87	3.69	10.23	3.15	2.61667	5.4	2.05333	2.42	3.52333	8.07667	1.85333	2.69333	3.20333	2.47333	2.24	2.22667	13.6733	6.00333	3.75333	3.21	2.87	3.00667	3.23	14.7533	2.29667	2.50667	4.15	2.33	2.49	3.9	16.84	2.81667	2.93	3.06667	2.85	2.27333	2.99667	10.9733	2.54	2.17333
271.184	3.64667	2.62333	2.1	3.13	3.66	3.16667	2.36	3.25667	2.27333	2.86333	3.68333	10.1567	3.14333	2.62	5.39333	2.05667	2.42	3.52	8.05333	1.85	2.7	3.19667	2.45667	2.24667	2.22333	13.6167	5.98667	3.73333	3.19333	2.86	3.00667	3.22333	14.7033	2.29	2.50333	4.13333	2.33333	2.48	3.89	16.7233	2.80667	2.92667	3.05667	2.84667	2.27	2.99667	10.9367	2.53667	2.16667
271.555	3.62667	2.6	2.09333	3.12333	3.65333	3.14667	2.35	3.24	2.26333	2.84333	3.66333	10.0733	3.12333	2.6	5.36	2.05333	2.4	3.5	8.01667	1.83333	2.69333	3.18667	2.44667	2.23333	2.21667	13.57	5.96	3.71667	3.17	2.84333	3	3.20667	14.65	2.27667	2.48667	4.09	2.31333	2.46333	3.86	16.5867	2.78333	2.90333	3.03	2.82667	2.25333	2.97	10.86	2.51333	2.15
271.926	3.6	2.58667	2.07667	3.10667	3.63667	3.13	2.34333	3.23	2.24333	2.83333	3.64333	9.98	3.11667	2.59	5.34	2.04333	2.38667	3.48667	8	1.83	2.68	3.18333	2.43333	2.22667	2.2	13.5133	5.93667	3.7	3.15667	2.83	2.98	3.20333	14.5833	2.26333	2.48	4.08333	2.31	2.46	3.85	16.4667	2.77333	2.89333	3.02333	2.82667	2.24	2.95	10.8133	2.49667	2.14667
272.297	3.59	2.57333	2.07333	3.09	3.62333	3.11	2.34	3.21667	2.23333	2.83	3.62667	9.92333	3.09667	2.58333	5.33	2.04	2.37333	3.47333	7.98	1.81333	2.67667	3.16667	2.41667	2.22	2.2	13.4467	5.92333	3.67333	3.14333	2.82333	2.96333	3.19667	14.5467	2.25667	2.47	4.06333	2.28667	2.44	3.83333	16.3633	2.75667	2.87333	2.99	2.8	2.23	2.93333	10.7633	2.48	2.12
272.668	3.58333	2.55667	2.05667	3.07667	3.61333	3.09	2.32667	3.21	2.21667	2.81667	3.61	9.86	3.08	2.56333	5.31	2.02	2.37	3.45667	7.94	1.80667	2.66667	3.15333	2.4	2.21333	2.18667	13.4033	5.89667	3.65333	3.13	2.80667	2.94667	3.18667	14.51	2.24333	2.45333	4.05333	2.27333	2.41667	3.82	16.25	2.73333	2.86333	2.96667	2.79667	2.21667	2.91667	10.7167	2.46667	2.11
273.039	3.57333	2.54333	2.05	3.06	3.59333	3.06333	2.32667	3.19667	2.21333	2.81	3.57667	9.79667	3.06333	2.56333	5.27667	2.01	2.36	3.44333	7.90333	1.8	2.64667	3.13	2.38667	2.19	2.17333	13.3567	5.87	3.63333	3.12	2.79	2.93	3.16667	14.4533	2.23333	2.43333	4.02333	2.25667	2.4	3.80667	16.1467	2.71667	2.83333	2.94667	2.77667	2.19667	2.89	10.64	2.44667	2.09333
273.41	3.57333	2.55333	2.04333	3.04	3.59	3.06333	2.33	3.18667	2.21333	2.8	3.57	9.74333	3.06	2.56667	5.26333	2.00667	2.36333	3.43667	7.87333	1.8	2.63667	3.13	2.39	2.19	2.17	13.3233	5.84667	3.62667	3.11667	2.8	2.92	3.16333	14.4333	2.22333	2.42333	4.01	2.25333	2.39	3.79	16.0733	2.71	2.82333	2.94	2.76667	2.18667	2.88333	10.6167	2.44333	2.08
273.781	3.56667	2.53667	2.04333	3.03333	3.56667	3.04667	2.31	3.16333	2.19667	2.78333	3.54667	9.72333	3.03667	2.55667	5.24333	2.00333	2.35667	3.42	7.83333	1.78333	2.62667	3.11667	2.36	2.17	2.15	13.2767	5.81667	3.61333	3.10667	2.78333	2.91333	3.14333	14.43	2.21333	2.40667	3.98	2.24333	2.37333	3.77	15.97	2.69667	2.80333	2.91333	2.73667	2.17	2.86667	10.5833	2.43	2.06333
274.152	3.55	2.52667	2.03667	3.02333	3.54667	3.03	2.31333	3.15667	2.19333	2.77333	3.53333	9.66	3.02333	2.55333	5.21333	1.99667	2.35	3.40667	7.81	1.78333	2.60333	3.10667	2.35667	2.16667	2.14	13.2367	5.78333	3.60667	3.1	2.78	2.9	3.13667	14.41	2.20333	2.39333	3.96333	2.23	2.36667	3.74667	15.8833	2.67333	2.78	2.90333	2.73	2.16	2.85	10.5467	2.41333	2.05333
274.522	3.53	2.52667	2.03	3.00667	3.51333	3.01	2.30333	3.15	2.18667	2.76	3.51667	9.63667	3.00667	2.55	5.18667	1.98	2.33	3.39333	7.81667	1.77667	2.58667	3.09	2.34667	2.15333	2.12333	13.2033	5.76667	3.59667	3.08	2.76667	2.88333	3.12333	14.4067	2.19	2.39	3.95333	2.23	2.37667	3.73667	15.85	2.67333	2.77333	2.89667	2.72	2.15667	2.85	10.5433	2.40333	2.04333
274.893	3.52667	2.51	2.01	2.99667	3.49	2.99333	2.28667	3.14667	2.18	2.75	3.51333	9.61	2.99333	2.53333	5.17333	1.97667	2.31	3.37	7.80667	1.76333	2.57667	3.07667	2.33667	2.14	2.11	13.1667	5.73667	3.58333	3.06667	2.75	2.87333	3.11333	14.4133	2.17333	2.37	3.95667	2.23333	2.37667	3.72333	15.8033	2.66333	2.77667	2.9	2.71333	2.15667	2.84	10.5333	2.39667	2.04667
275.264	3.5	2.47667	1.99	2.98	3.45	2.97333	2.25	3.12	2.16333	2.73	3.47667	9.56667	2.97333	2.52	5.15333	1.96333	2.28	3.34333	7.79333	1.74333	2.55667	3.05	2.31667	2.12	2.08	13.1067	5.7	3.55333	3.04667	2.72333	2.85333	3.09333	14.3967	2.15333	2.35333	3.95	2.23667	2.38	3.71333	15.7633	2.65333	2.76333	2.89333	2.71333	2.16	2.84333	10.5267	2.39	2.04333
275.635	3.49667	2.46667	1.98333	2.96667	3.44333	2.97	2.25	3.11667	2.16667	2.72667	3.46	9.53	2.97	2.50667	5.14	1.95333	2.27333	3.32667	7.79333	1.75	2.55667	3.04	2.32	2.11667	2.07333	13.0833	5.68	3.55333	3.03667	2.72	2.83667	3.08	14.39	2.14333	2.34667	3.94667	2.22	2.37667	3.7	15.76	2.65	2.75667	2.87667	2.70333	2.15333	2.83333	10.5133	2.39	2.04
276.005	3.49667	2.45667	1.98	2.96	3.43333	2.96333	2.23667	3.10333	2.16667	2.71333	3.45667	9.53333	2.96333	2.49667	5.13667	1.94667	2.26	3.32	7.77667	1.74	2.55	3.04333	2.30667	2.1	2.06667	13.0667	5.66	3.53667	3.03333	2.71333	2.83	3.07	14.38	2.14333	2.34	3.95333	2.22667	2.37667	3.69667	15.7567	2.65333	2.76333	2.88667	2.71667	2.16667	2.82667	10.5067	2.4	2.04667
276.376	3.49	2.44667	1.97667	2.96333	3.42	2.96333	2.23	3.09667	2.16333	2.7	3.44667	9.51667	2.96667	2.48667	5.13333	1.94667	2.25667	3.32667	7.75667	1.73333	2.54333	3.03667	2.30333	2.08667	2.07333	13.06	5.64333	3.53333	3.03	2.71667	2.83	3.06333	14.3867	2.14667	2.33	3.93333	2.21667	2.36667	3.67667	15.74	2.64	2.75	2.87667	2.71	2.16	2.81333	10.4633	2.39	2.04
276.746	3.48667	2.45667	1.99333	2.95667	3.43	2.96667	2.24333	3.09667	2.16333	2.71333	3.44667	9.51	2.96333	2.49	5.13	1.95	2.26667	3.33333	7.75333	1.73333	2.53333	3.04	2.3	2.08667	2.08	13.06	5.65333	3.54	3.03333	2.71667	2.83333	3.07333	14.3933	2.16	2.34333	3.91	2.19333	2.36333	3.65667	15.72	2.63	2.73	2.87	2.69667	2.14667	2.79667	10.4367	2.37667	2.02
277.117	3.48667	2.45667	1.99333	2.95333	3.43	2.94667	2.24667	3.1	2.15667	2.71667	3.44667	9.50667	2.96	2.48333	5.12	1.94333	2.27333	3.33	7.74333	1.74333	2.53	3.03667	2.29	2.07667	2.07333	13.0567	5.63667	3.53667	3.02333	2.70667	2.82333	3.06	14.38	2.15667	2.34333	3.89333	2.17	2.34	3.63667	15.7067	2.60667	2.70667	2.85	2.67667	2.12667	2.77	10.38	2.36333	2.00333
277.487	3.47667	2.45667	1.98667	2.95667	3.44	2.94667	2.24333	3.08667	2.15333	2.71667	3.44	9.50333	2.95333	2.48333	5.10333	1.93667	2.27	3.32667	7.74	1.73	2.52667	3.03333	2.28333	2.07	2.07333	13.0367	5.62667	3.52	3.02333	2.70333	2.82333	3.06	14.36	2.16	2.34667	3.88667	2.16667	2.33333	3.63	15.6833	2.6	2.69	2.85	2.66667	2.12	2.75667	10.3267	2.35	1.99333
277.858	3.44333	2.43333	1.97	2.93333	3.43667	2.92667	2.22	3.06667	2.14333	2.7	3.42	9.44333	2.93667	2.46333	5.07333	1.92333	2.25	3.30333	7.71333	1.72333	2.50667	3.00333	2.26333	2.05667	2.05333	12.97	5.6	3.5	2.99667	2.69	2.8	3.02667	14.3133	2.13667	2.33	3.86	2.15333	2.32333	3.61333	15.6233	2.58	2.67333	2.83	2.64333	2.1	2.75	10.2433	2.33333	1.98667
278.228	3.42667	2.42	1.96	2.92	3.43667	2.91333	2.21333	3.04333	2.13	2.69	3.40667	9.38667	2.91333	2.45	5.05	1.91333	2.25333	3.28	7.68333	1.71667	2.50333	2.98667	2.26	2.06	2.03333	12.9033	5.56667	3.47667	2.98667	2.67667	2.78667	3.01	14.24	2.12333	2.31667	3.84667	2.14667	2.32	3.59333	15.55	2.58333	2.67	2.82333	2.65	2.09333	2.73	10.1833	2.33333	1.98333
278.599	3.41333	2.40333	1.94333	2.91	3.42667	2.89333	2.18667	3.01667	2.11667	2.66	3.38	9.32667	2.89	2.43	5.01	1.89	2.23333	3.26	7.63667	1.70667	2.49333	2.96667	2.24667	2.04667	2.00667	12.8067	5.52333	3.45	2.96	2.66333	2.76333	2.98	14.1567	2.11667	2.3	3.83333	2.15	2.30667	3.57667	15.4933	2.57667	2.66667	2.81	2.64333	2.08667	2.73	10.1233	2.33	1.98
278.969	3.38667	2.39	1.94667	2.9	3.43	2.88667	2.18	3	2.11333	2.64667	3.37667	9.27	2.88333	2.42667	4.97667	1.88667	2.22667	3.25	7.6	1.71	2.48333	2.95667	2.23667	2.04	2.01667	12.7167	5.5	3.44	2.95667	2.66333	2.75667	2.97	14.0733	2.11333	2.28667	3.80333	2.12333	2.29667	3.55333	15.3933	2.56667	2.65333	2.78333	2.62333	2.07	2.71333	10.06	2.32333	1.96
279.339	3.36333	2.37	1.92333	2.87	3.40333	2.86333	2.17	2.99667	2.09333	2.62333	3.36	9.2	2.87	2.40667	4.94	1.88333	2.21667	3.23	7.56	1.71	2.47	2.93667	2.23	2.01667	2.00333	12.6333	5.47667	3.42333	2.94667	2.64	2.73667	2.95667	14.0033	2.11	2.26333	3.79	2.11333	2.28667	3.53	15.3267	2.54667	2.64333	2.78333	2.62	2.06333	2.69333	10.02	2.32333	1.96333
279.71	3.36333	2.36333	1.91667	2.85667	3.39333	2.85333	2.17	2.99333	2.09333	2.61333	3.34667	9.16667	2.86333	2.41333	4.92	1.88	2.22	3.22667	7.54	1.7	2.47	2.93	2.22667	2.00667	2	12.57	5.46333	3.42	2.94667	2.63667	2.73667	2.94333	13.96	2.10667	2.26	3.77667	2.10333	2.27	3.52333	15.26	2.53333	2.63333	2.77333	2.60333	2.04667	2.69333	10.0167	2.31667	1.95
280.08	3.35	2.34	1.9	2.83333	3.36667	2.83	2.15667	2.97	2.06667	2.59667	3.32333	9.12667	2.84333	2.38667	4.9	1.86	2.19	3.2	7.52	1.69	2.45	2.90667	2.19333	1.99333	1.98333	12.4733	5.43333	3.41333	2.91333	2.61667	2.70667	2.91667	13.9267	2.08	2.24333	3.75667	2.08667	2.26333	3.49667	15.19	2.51333	2.61333	2.76	2.58333	2.04333	2.68333	9.99	2.3	1.93
280.45	3.34333	2.32333	1.9	2.81333	3.33333	2.81667	2.14667	2.97333	2.05333	2.59	3.31	9.09667	2.83667	2.38	4.88	1.86667	2.17667	3.19	7.50667	1.68333	2.44	2.9	2.19	1.98	1.98333	12.4133	5.42667	3.41	2.91333	2.60667	2.69	2.91	13.88	2.07	2.24	3.75	2.07333	2.24	3.48	15.1	2.49667	2.60333	2.74333	2.57333	2.03667	2.66	9.97333	2.28333	1.92
280.82	3.34	2.32667	1.9	2.81333	3.30333	2.82333	2.14333	2.96667	2.05667	2.58667	3.29667	9.09667	2.83667	2.38333	4.89	1.87333	2.17667	3.19	7.50333	1.68	2.42667	2.9	2.19667	1.97667	1.97333	12.3633	5.42667	3.40333	2.91333	2.60333	2.7	2.91	13.86	2.06667	2.24333	3.76	2.08667	2.23667	3.48667	15.1033	2.49667	2.6	2.74667	2.57333	2.04	2.67333	9.99	2.28667	1.93
281.19	3.34667	2.33	1.89667	2.83333	3.28	2.82667	2.14	2.95333	2.05667	2.58667	3.29333	9.09333	2.83	2.38667	4.91	1.87333	2.17	3.19333	7.49667	1.67	2.43	2.89667	2.19667	1.99333	1.96667	12.3333	5.42667	3.41	2.92	2.61333	2.7	2.90333	13.8267	2.06333	2.25	3.76	2.08333	2.23667	3.48	15.0667	2.5	2.60667	2.73667	2.57	2.05	2.67333	9.99	2.27667	1.92667
281.561	3.33333	2.32333	1.88667	2.82333	3.24333	2.82	2.12333	2.93333	2.05	2.58	3.27667	9.07333	2.80667	2.36667	4.89667	1.86	2.15667	3.17667	7.47667	1.65667	2.42333	2.88333	2.18667	1.97667	1.94667	12.2867	5.41	3.4	2.90333	2.59667	2.68	2.9	13.79	2.05333	2.23333	3.75333	2.07	2.23333	3.46667	15.0433	2.48667	2.60333	2.72667	2.56667	2.04667	2.66333	9.98667	2.27	1.91667
281.931	3.34333	2.32667	1.88667	2.82333	3.23667	2.82667	2.12667	2.95333	2.07	2.59	3.28	9.10667	2.81667	2.39333	4.90333	1.87333	2.17333	3.18333	7.47333	1.66667	2.42667	2.88667	2.20333	1.98	1.95	12.2967	5.42333	3.4	2.92667	2.59667	2.68667	2.91667	13.74	2.05667	2.23333	3.74667	2.06333	2.22667	3.46667	15.0533	2.48333	2.60333	2.72333	2.57	2.02667	2.65667	9.98333	2.27667	1.91333
282.301	3.32667	2.31333	1.87	2.81667	3.22333	2.81667	2.11	2.93667	2.07	2.57333	3.27333	9.12333	2.81333	2.4	4.9	1.86667	2.15667	3.17667	7.47667	1.67	2.42333	2.86	2.19333	1.97	1.93	12.2867	5.39667	3.40333	2.93	2.57667	2.68667	2.90333	13.7133	2.05	2.21667	3.73667	2.06	2.22	3.45333	15.0833	2.47333	2.6	2.72333	2.56333	2.01333	2.66333	9.97	2.26667	1.90333
282.671	3.32667	2.31	1.87333	2.81333	3.22667	2.80667	2.10667	2.94	2.07667	2.57	3.27	9.14333	2.81	2.39667	4.89	1.85667	2.16667	3.17667	7.48333	1.66333	2.43	2.85333	2.19	1.97	1.92	12.28	5.39667	3.40333	2.92667	2.57	2.68	2.90667	13.6767	2.05	2.20667	3.75	2.06	2.22667	3.46	15.1267	2.48	2.62	2.73667	2.57667	2.02	2.65667	9.97333	2.27	1.91333
283.041	3.31667	2.30333	1.87	2.79	3.23667	2.79667	2.10333	2.94667	2.08333	2.57	3.27333	9.18333	2.82	2.39333	4.88	1.86333	2.16	3.17667	7.47333	1.66667	2.41667	2.84333	2.18	1.96	1.92	12.2967	5.39667	3.39667	2.93333	2.56333	2.67667	2.9	13.6433	2.04667	2.20667	3.74667	2.06333	2.23	3.44333	15.2033	2.48667	2.62	2.75	2.58667	2.01	2.66333	9.98333	2.27667	1.91667
283.411	3.34	2.31333	1.87333	2.81	3.25333	2.81667	2.11333	2.97	2.09	2.57	3.28333	9.23667	2.83	2.40333	4.88667	1.87333	2.18	3.20333	7.48333	1.67667	2.43	2.86	2.19	1.97333	1.94	12.3267	5.41667	3.41667	2.94333	2.56667	2.69	2.89667	13.64	2.05667	2.22	3.75667	2.07333	2.23	3.44667	15.2933	2.49667	2.63	2.75333	2.59333	2.01667	2.65667	9.99333	2.27667	1.93333
283.78	3.34667	2.32	1.88333	2.82	3.27667	2.82333	2.12667	2.96667	2.09	2.57333	3.28667	9.28	2.83667	2.4	4.89667	1.87667	2.19	3.21667	7.48	1.66667	2.43	2.85667	2.18667	1.97	1.94	12.3267	5.41667	3.42333	2.94667	2.57333	2.7	2.9	13.6367	2.06333	2.22333	3.77333	2.09333	2.24	3.45	15.3767	2.51	2.64	2.77667	2.6	2.03667	2.67	10.0133	2.28	1.94667
284.15	3.36333	2.33667	1.89667	2.82333	3.30333	2.83333	2.15	2.97	2.1	2.58667	3.29667	9.31667	2.83667	2.41	4.91	1.88333	2.20333	3.21667	7.48667	1.66333	2.44667	2.87	2.17667	1.97	1.95333	12.3333	5.44333	3.43	2.94667	2.58333	2.70667	2.91333	13.6267	2.07667	2.23333	3.78333	2.09333	2.24667	3.45	15.4667	2.52333	2.65	2.77667	2.60333	2.04	2.67333	10.0433	2.29333	1.95333
284.52	3.36	2.34	1.89667	2.82667	3.31333	2.83667	2.15333	2.96667	2.1	2.58667	3.31	9.34	2.83667	2.4	4.91	1.88667	2.2	3.22333	7.47	1.67	2.45667	2.86333	2.16667	1.96333	1.96	12.3333	5.44	3.44667	2.94333	2.59333	2.7	2.90667	13.6067	2.07	2.23	3.78	2.09	2.25	3.44	15.4933	2.53	2.65	2.76667	2.6	2.03333	2.66667	10.03	2.28667	1.94667
284.89	3.38333	2.36	1.91333	2.83667	3.34	2.86	2.17	2.97333	2.10667	2.6	3.32333	9.35	2.84667	2.41333	4.92667	1.9	2.22	3.23667	7.48	1.67333	2.47333	2.87333	2.17667	1.97	1.97	12.2967	5.46	3.47	2.95333	2.6	2.70667	2.93	13.5933	2.08667	2.24667	3.78333	2.1	2.26333	3.46333	15.52	2.53667	2.66667	2.76667	2.61	2.04333	2.67667	10.0433	2.30667	1.95333
285.26	3.38	2.36667	1.91667	2.83333	3.36	2.85667	2.17667	2.97	2.11	2.61	3.32667	9.38667	2.86	2.42	4.93667	1.89667	2.21667	3.23	7.47333	1.68333	2.47	2.86	2.18333	1.96333	1.97	12.26	5.46667	3.46333	2.96	2.60333	2.7	2.94	13.5433	2.09	2.25	3.78667	2.09667	2.25667	3.47	15.5133	2.53333	2.66333	2.78333	2.61333	2.04667	2.68	10.03	2.31	1.94667
285.629	3.38333	2.39	1.92667	2.84333	3.36667	2.87	2.18667	2.98333	2.12	2.62333	3.34667	9.42333	2.88	2.43	4.94333	1.90333	2.22667	3.25333	7.48667	1.7	2.49	2.86	2.20333	1.96667	1.98667	12.2233	5.49667	3.48667	2.97333	2.60667	2.71	2.95667	13.49	2.1	2.27333	3.80333	2.1	2.26	3.49	15.5	2.54667	2.67333	2.77667	2.61333	2.05	2.68667	10.0333	2.32	1.95
285.999	3.39	2.40667	1.93667	2.86333	3.37667	2.88667	2.19333	3.00333	2.12333	2.63333	3.35	9.43667	2.88667	2.43667	4.95667	1.91333	2.24	3.26333	7.47667	1.71	2.48	2.87	2.21667	1.97667	1.99667	12.1867	5.52667	3.5	2.98333	2.62667	2.71667	2.96	13.4333	2.10667	2.28333	3.81	2.10333	2.26	3.5	15.44	2.55	2.67333	2.77	2.61	2.05	2.68667	10.04	2.31	1.94667
286.369	3.40333	2.41333	1.93667	2.88333	3.40333	2.90333	2.21	3.01667	2.13667	2.64	3.35333	9.46667	2.90667	2.44667	4.97667	1.92	2.24667	3.27	7.49333	1.72667	2.48667	2.88333	2.23	1.98667	2.01	12.1667	5.56	3.51333	2.99667	2.63333	2.73	2.97333	13.3833	2.11667	2.3	3.81667	2.10333	2.25333	3.5	15.3933	2.55	2.67	2.76667	2.61333	2.05	2.69333	10.0467	2.31	1.95
286.738	3.4	2.42333	1.93333	2.88333	3.41667	2.91333	2.21333	3.03	2.13667	2.64333	3.36	9.50333	2.90667	2.45667	4.99333	1.91	2.25	3.27333	7.50333	1.73	2.49333	2.88333	2.23	1.98667	2.01667	12.16	5.58	3.53667	3	2.64333	2.73	2.97	13.3667	2.11333	2.3	3.83333	2.11333	2.25667	3.5	15.3533	2.56	2.67667	2.77667	2.60667	2.06333	2.70667	10.0733	2.31333	1.96
287.108	3.43333	2.45	1.95333	2.91333	3.45667	2.95333	2.24333	3.05	2.16667	2.67	3.38667	9.53667	2.93667	2.48	5.03667	1.93	2.27667	3.30333	7.54333	1.76333	2.52667	2.91	2.25333	2.01667	2.05	12.21	5.63667	3.58667	3.02	2.67	2.76667	3	13.38	2.15	2.32333	3.86667	2.13	2.28667	3.53	15.3767	2.57667	2.70333	2.79333	2.62667	2.08667	2.74	10.1367	2.33667	1.98333
287.477	3.44	2.45333	1.96	2.92667	3.48333	2.96333	2.24667	3.06	2.17333	2.67667	3.39667	9.55333	2.94667	2.49	5.06667	1.93333	2.27333	3.31	7.56333	1.77	2.53	2.92	2.25	2.02333	2.04667	12.2667	5.67333	3.62333	3.03333	2.67667	2.77333	3.00667	13.42	2.16	2.32333	3.88	2.13	2.29667	3.55	15.3933	2.58333	2.71	2.81	2.63333	2.09333	2.74667	10.1867	2.34667	2
287.847	3.46	2.46667	1.97	2.94333	3.51667	2.99333	2.26667	3.08	2.18667	2.69	3.43333	9.6	2.97667	2.52	5.1	1.95	2.28333	3.33667	7.60667	1.79333	2.56	2.94	2.27333	2.04333	2.06333	12.3333	5.71	3.67	3.05667	2.69333	2.8	3.02667	13.4833	2.17667	2.34333	3.89667	2.15	2.32	3.57333	15.48	2.60333	2.73333	2.83667	2.66	2.11667	2.76667	10.2367	2.37	2.01667
288.216	3.47	2.47667	1.98333	2.95667	3.54667	3.00667	2.27667	3.1	2.19333	2.71333	3.46	9.65333	3	2.53667	5.12667	1.95667	2.30333	3.35333	7.65333	1.80333	2.58667	2.94333	2.29	2.06	2.08333	12.42	5.75333	3.71333	3.08	2.70333	2.82667	3.04667	13.5967	2.19	2.35667	3.94	2.17333	2.35	3.60333	15.5767	2.62667	2.75667	2.87333	2.68	2.14	2.79	10.3167	2.39667	2.04667
288.586	3.49667	2.48	2	2.97333	3.57333	3.03	2.28	3.11333	2.2	2.72667	3.47333	9.69	3.02	2.55	5.15667	1.97667	2.31	3.38	7.71	1.81	2.61333	2.95333	2.30333	2.08333	2.1	12.53	5.81333	3.74333	3.09667	2.72	2.85333	3.06333	13.7233	2.2	2.37333	3.96333	2.2	2.37	3.63333	15.6867	2.64	2.77	2.89667	2.70333	2.15	2.79333	10.38	2.40333	2.07
288.955	3.51333	2.5	2.00333	2.99333	3.59333	3.04	2.29333	3.14	2.21	2.74333	3.5	9.75	3.04	2.56667	5.18333	1.98667	2.32	3.39333	7.78667	1.82	2.63333	2.98333	2.32333	2.10667	2.12	12.6633	5.87	3.78333	3.11667	2.73667	2.87	3.08	13.9133	2.21667	2.39	3.97667	2.20667	2.37	3.65	15.7833	2.64667	2.79	2.90333	2.71	2.15333	2.80667	10.4467	2.40667	2.06667
289.324	3.55667	2.52333	2.02333	3.02667	3.64	3.07333	2.32667	3.17667	2.22667	2.77	3.52667	9.83	3.06667	2.6	5.22667	2.00667	2.34333	3.42	7.87	1.84667	2.66	3.01333	2.35333	2.15	2.14667	12.8033	5.94	3.84333	3.14667	2.76667	2.90667	3.12	14.1567	2.24	2.41333	4.00667	2.24	2.40333	3.68667	15.9133	2.67333	2.82333	2.93667	2.74667	2.18333	2.84	10.5367	2.43667	2.09333
289.694	3.59	2.55333	2.05333	3.05333	3.67333	3.11667	2.35333	3.19667	2.24667	2.81	3.54667	9.90333	3.09667	2.61667	5.26333	2.02333	2.37	3.44333	7.96333	1.86667	2.69	3.04667	2.38	2.17667	2.17667	12.9633	6.00333	3.89667	3.17	2.79667	2.94	3.15	14.3633	2.26667	2.44	4.03667	2.26333	2.42333	3.72	16.0167	2.69333	2.84667	2.96	2.77	2.21	2.86667	10.62	2.45333	2.12
290.063	3.62667	2.58333	2.07333	3.08667	3.70667	3.15333	2.38	3.21667	2.26667	2.83667	3.57333	9.96	3.13	2.65333	5.30667	2.05	2.38667	3.47667	8.04333	1.88667	2.7	3.08333	2.41333	2.21333	2.20667	13.13	6.05333	3.94333	3.2	2.82	2.96333	3.17667	14.5733	2.29	2.45667	4.05	2.29667	2.44	3.75333	16.13	2.71667	2.87667	2.97333	2.79667	2.23667	2.9	10.6967	2.47667	2.13333
290.432	3.64333	2.61	2.09333	3.11	3.74667	3.18333	2.40667	3.23333	2.29667	2.86667	3.60667	10.0233	3.15333	2.66667	5.34667	2.07	2.40333	3.5	8.12333	1.90333	2.72333	3.11667	2.44	2.24333	2.24	13.2533	6.09667	3.99	3.22667	2.84	2.98667	3.20333	14.7667	2.30667	2.46667	4.07333	2.32	2.46333	3.78333	16.2267	2.74	2.90333	3	2.82333	2.25667	2.92667	10.7667	2.49667	2.15333
290.801	3.65	2.6	2.1	3.11667	3.77	3.20333	2.39667	3.23333	2.29	2.87	3.60333	10.05	3.14333	2.67	5.34	2.07	2.4	3.50667	8.16	1.90333	2.71667	3.11	2.43333	2.23667	2.25	13.36	6.11333	4.01	3.22333	2.84	2.98	3.20333	14.9067	2.3	2.46667	4.09667	2.34	2.49	3.80667	16.3033	2.77	2.92333	3.02333	2.84667	2.28	2.95333	10.84	2.51667	2.16667
291.17	3.65667	2.61333	2.11333	3.12	3.79333	3.21667	2.41	3.25	2.31	2.88	3.61667	10.0733	3.17	2.67333	5.35	2.08	2.41333	3.52	8.21333	1.91667	2.72333	3.12333	2.44333	2.25333	2.27667	13.47	6.16	4.03333	3.24333	2.85333	2.98667	3.21333	15.02	2.31333	2.47333	4.11	2.34	2.5	3.82333	16.3767	2.77333	2.92	3.03	2.85333	2.29	2.95667	10.8767	2.53	2.17333
291.54	3.66333	2.61667	2.10667	3.13	3.81667	3.22	2.41333	3.26333	2.32333	2.88	3.62	10.08	3.17333	2.68333	5.36	2.08667	2.42333	3.52	8.25667	1.92	2.74	3.13333	2.46	2.27	2.29	13.5333	6.18	4.05	3.25667	2.86	2.97667	3.20333	15.1433	2.30333	2.48667	4.13333	2.34333	2.52	3.83667	16.4233	2.78333	2.93667	3.04667	2.87	2.29667	2.97333	10.9133	2.53667	2.18333
291.909	3.66667	2.60667	2.11	3.12667	3.84333	3.22667	2.41667	3.26	2.32667	2.87333	3.62	10.0833	3.16667	2.68	5.36667	2.07667	2.42333	3.52	8.31	1.91667	2.75667	3.13	2.45667	2.27667	2.30333	13.5767	6.21	4.06667	3.26333	2.86	2.98333	3.20333	15.2267	2.29667	2.48333	4.13	2.33333	2.52667	3.84333	16.4433	2.78333	2.93333	3.05667	2.86667	2.3	2.97667	10.92	2.54333	2.18333
292.278	3.67667	2.61333	2.11333	3.13333	3.85667	3.22333	2.42	3.27333	2.32667	2.87	3.61333	10.09	3.16667	2.68	5.35667	2.08333	2.42	3.52	8.35	1.92667	2.75333	3.13667	2.47	2.28333	2.31333	13.63	6.23	4.07667	3.26667	2.86667	2.97667	3.2	15.2833	2.3	2.48333	4.13	2.32333	2.52667	3.84333	16.4733	2.78	2.93333	3.05667	2.86333	2.30667	2.97667	10.9267	2.54667	2.17667
292.647	3.69667	2.62667	2.12667	3.14	3.89333	3.23667	2.44667	3.29	2.34667	2.88667	3.63333	10.11	3.19	2.69333	5.37667	2.09667	2.44333	3.54	8.39667	1.94333	2.78	3.16333	2.50333	2.32	2.34333	13.68	6.26	4.13	3.29	2.88667	2.99667	3.22333	15.3267	2.32333	2.5	4.12667	2.34	2.53667	3.84333	16.5	2.79	2.93667	3.06	2.88333	2.31667	2.98333	10.9267	2.55333	2.19333
293.016	3.69333	2.62667	2.12	3.14333	3.91667	3.22667	2.44	3.29	2.34	2.88333	3.61333	10.0967	3.18	2.7	5.37667	2.08667	2.44	3.53333	8.41667	1.92667	2.78333	3.16	2.50667	2.33333	2.35667	13.68	6.24667	4.14	3.29	2.87333	2.99667	3.21	15.3467	2.31667	2.50333	4.13333	2.34667	2.53667	3.85667	16.4833	2.79333	2.95	3.06333	2.89667	2.33	2.99667	10.9433	2.55667	2.21667
293.385	3.68	2.61333	2.12333	3.14667	3.94333	3.23667	2.43667	3.29	2.33	2.88	3.60333	10.0867	3.18	2.68333	5.36333	2.08	2.43667	3.53	8.43667	1.92667	2.78	3.16333	2.51	2.33	2.36667	13.6967	6.24	4.15667	3.28333	2.86667	3	3.22667	15.3433	2.32333	2.49667	4.12667	2.35	2.52333	3.85	16.46	2.79333	2.93333	3.05667	2.9	2.33	2.98667	10.9233	2.55333	2.20333
293.753	3.68	2.62333	2.13	3.15333	3.97333	3.23667	2.44	3.29667	2.33	2.87667	3.60333	10.0733	3.18	2.69	5.34667	2.08667	2.44333	3.54	8.44	1.93667	2.78	3.17	2.52	2.34333	2.38333	13.7033	6.25	4.18	3.28	2.87333	3	3.22667	15.3433	2.33333	2.5	4.12333	2.36	2.52667	3.85	16.4467	2.79667	2.93333	3.04333	2.90333	2.34333	2.99667	10.9167	2.55333	2.21333
294.122	3.67333	2.61667	2.12667	3.15333	3.99333	3.23333	2.45	3.29	2.32	2.88333	3.60667	10.0667	3.17667	2.69333	5.34667	2.07667	2.44333	3.53667	8.43333	1.93333	2.77333	3.16333	2.53	2.35	2.4	13.72	6.25	4.19	3.27333	2.86667	3	3.23667	15.3667	2.33667	2.49667	4.11667	2.37	2.53333	3.84667	16.4167	2.79667	2.92667	3.05333	2.90333	2.35	3	10.9167	2.55333	2.22667
294.491	3.66	2.61333	2.12667	3.15667	4.03333	3.23333	2.44667	3.28	2.31667	2.87333	3.6	10.0467	3.17667	2.69	5.33333	2.07667	2.44667	3.52667	8.43333	1.92667	2.77667	3.16	2.52667	2.35333	2.4	13.7	6.23667	4.19	3.27	2.86	2.99	3.22667	15.3667	2.33333	2.49333	4.10667	2.36333	2.52	3.84	16.3633	2.79333	2.91333	3.04333	2.89	2.34	2.98667	10.8933	2.54	2.21333
294.86	3.64667	2.59	2.12	3.14	4.05	3.22667	2.43667	3.26667	2.30333	2.86333	3.58667	10.0267	3.16	2.67667	5.30333	2.07667	2.42667	3.50667	8.43333	1.92333	2.75	3.14667	2.53	2.35667	2.40333	13.6767	6.22	4.17667	3.26	2.85667	2.97	3.20667	15.3233	2.31667	2.47667	4.08667	2.34667	2.51	3.81333	16.3067	2.79333	2.9	3.03333	2.86667	2.33	2.97333	10.8567	2.52333	2.19667
295.229	3.64333	2.58333	2.10667	3.12667	4.07333	3.20333	2.43333	3.26	2.29	2.85333	3.57667	10.0133	3.14	2.67333	5.27667	2.07	2.41333	3.49	8.41	1.91333	2.74	3.14	2.52333	2.36	2.41333	13.66	6.21333	4.17	3.24667	2.85	2.95333	3.19333	15.3067	2.31	2.46667	4.06667	2.33333	2.50667	3.80667	16.26	2.78333	2.9	3.03333	2.85333	2.33	2.97333	10.8433	2.52	2.2
295.597	3.63	2.58	2.10667	3.11667	4.09667	3.2	2.42333	3.25	2.28	2.85	3.56	9.99667	3.12667	2.66333	5.26667	2.06	2.40667	3.47333	8.42	1.90667	2.72667	3.13333	2.52	2.36667	2.41667	13.6567	6.19333	4.17333	3.24333	2.84	2.94	3.19	15.2867	2.3	2.46	4.05	2.32333	2.5	3.78333	16.1967	2.76333	2.89	3.03333	2.83333	2.31667	2.96333	10.82	2.51333	2.19333
295.966	3.61667	2.57	2.11667	3.1	4.13667	3.19667	2.42333	3.24333	2.28333	2.83667	3.54	9.96667	3.12667	2.66	5.23667	2.06333	2.40333	3.46	8.43333	1.90667	2.71333	3.13	2.53	2.37333	2.42	13.6333	6.19	4.18	3.25	2.83667	2.93667	3.17667	15.27	2.29	2.46	4.02667	2.3	2.48	3.76333	16.1333	2.74333	2.87	3.00333	2.81667	2.31	2.94333	10.78	2.50667	2.17
296.335	3.61333	2.56667	2.10667	3.09667	4.15667	3.19333	2.41667	3.24	2.26667	2.83	3.52667	9.93667	3.1	2.66	5.22333	2.07	2.39333	3.45333	8.42333	1.90667	2.70667	3.11667	2.53	2.37667	2.42667	13.6067	6.18	4.18	3.24667	2.82	2.92333	3.18	15.25	2.28	2.44333	4.01	2.28333	2.47333	3.74667	16.0867	2.73	2.87	2.99333	2.81	2.31333	2.94	10.7533	2.49667	2.17667
296.703	3.60333	2.57667	2.11667	3.1	4.18333	3.19667	2.42333	3.23667	2.27667	2.82333	3.52667	9.91667	3.1	2.66333	5.20667	2.07	2.39667	3.45333	8.42333	1.90667	2.72	3.11333	2.53333	2.38	2.44	13.5933	6.17	4.20667	3.23667	2.81333	2.93	3.18667	15.25	2.28667	2.44333	3.99667	2.29	2.46667	3.74333	16.0333	2.71	2.86333	2.99	2.80667	2.31	2.92667	10.7333	2.49333	2.17
297.072	3.60667	2.57667	2.12667	3.10333	4.21667	3.20667	2.43	3.23667	2.28	2.82	3.53	9.90333	3.11	2.67	5.20667	2.07	2.39333	3.45667	8.45	1.91333	2.73667	3.11667	2.55333	2.39667	2.46333	13.5967	6.17333	4.22333	3.25	2.81	2.92667	3.18667	15.2567	2.28667	2.44667	3.98667	2.28	2.45667	3.73667	15.98	2.70667	2.85333	2.97333	2.81	2.31667	2.92333	10.71	2.49	2.16333
297.44	3.60667	2.56	2.13333	3.10333	4.24333	3.21	2.42	3.22667	2.28333	2.82667	3.52667	9.9	3.10333	2.66667	5.19333	2.07333	2.39333	3.44667	8.43333	1.91333	2.74333	3.11	2.56	2.40667	2.48	13.5733	6.17667	4.23667	3.25667	2.8	2.91667	3.19333	15.2567	2.28	2.44667	3.98	2.26	2.45	3.74	15.9367	2.7	2.83667	2.96333	2.80333	2.31333	2.90667	10.7033	2.46667	2.17
297.809	3.59667	2.55667	2.11667	3.10667	4.25333	3.19667	2.41333	3.23	2.28	2.82	3.50667	9.87333	3.09333	2.65	5.17	2.06333	2.38333	3.43667	8.42667	1.9	2.73667	3.11	2.55333	2.39667	2.47667	13.5467	6.16667	4.22333	3.25	2.8	2.91	3.17667	15.2167	2.28333	2.44	3.98	2.26667	2.44667	3.74333	15.8767	2.69333	2.83667	2.97	2.81	2.32	2.90333	10.6733	2.45667	2.17333
298.177	3.58	2.54333	2.11667	3.09	4.26	3.18333	2.4	3.21333	2.26667	2.81667	3.49667	9.82333	3.09	2.63333	5.13	2.04	2.37667	3.41667	8.43	1.88333	2.72	3.09667	2.54667	2.4	2.48	13.5233	6.15	4.22	3.24333	2.78667	2.89	3.15333	15.1867	2.26667	2.43	3.97667	2.28333	2.45333	3.74333	15.8033	2.68667	2.82	2.97333	2.8	2.31667	2.9	10.6567	2.45	2.17333
298.546	3.56333	2.53	2.11	3.08667	4.27667	3.17333	2.39	3.2	2.25333	2.81667	3.48667	9.8	3.08	2.61667	5.12667	2.03333	2.38	3.40333	8.43	1.88333	2.7	3.08667	2.54	2.40667	2.47667	13.5267	6.15333	4.21667	3.23667	2.77333	2.88333	3.13667	15.19	2.25333	2.42	3.96	2.26667	2.44667	3.73	15.7633	2.67333	2.81	2.95667	2.8	2.32	2.89	10.6367	2.44667	2.17
298.914	3.54	2.53	2.10333	3.08667	4.29	3.16667	2.38333	3.19	2.23667	2.81333	3.47333	9.78333	3.07	2.61333	5.11	2.03	2.37667	3.4	8.42667	1.88	2.69	3.08333	2.53333	2.41333	2.47	13.54	6.14333	4.21	3.23	2.76667	2.89	3.12333	15.1967	2.24	2.40667	3.96333	2.28	2.45333	3.73333	15.7467	2.67333	2.81667	2.96667	2.80667	2.31667	2.88	10.64	2.44667	2.18
299.282	3.53333	2.53333	2.09333	3.08333	4.29333	3.15	2.38667	3.18	2.23333	2.79333	3.45667	9.76	3.06333	2.60667	5.08667	2.02	2.36667	3.38667	8.43	1.87	2.68	3.06	2.54333	2.41	2.46667	13.5433	6.13	4.20333	3.22667	2.76333	2.88667	3.11	15.2033	2.24333	2.39	3.96333	2.30333	2.47333	3.73	15.7333	2.69333	2.83	2.98	2.81333	2.33333	2.89	10.64	2.46667	2.18
299.651	3.53667	2.52667	2.08667	3.08333	4.30333	3.15667	2.37667	3.18	2.22333	2.79	3.46	9.77667	3.05667	2.61333	5.08667	2.01667	2.36333	3.37333	8.44667	1.88	2.68667	3.05667	2.54667	2.42667	2.49	13.5633	6.11667	4.23333	3.22	2.76	2.88333	3.11333	15.2467	2.24667	2.38667	3.96	2.30333	2.47	3.71	15.7333	2.69333	2.83	2.97	2.80667	2.33333	2.88667	10.6367	2.47333	2.18667
300.019	3.54667	2.54	2.08667	3.10333	4.33	3.16667	2.38667	3.19333	2.23333	2.79	3.46333	9.81	3.05667	2.62333	5.09333	2.02333	2.36333	3.38667	8.48	1.89667	2.7	3.06667	2.56	2.43667	2.5	13.61	6.13333	4.25333	3.22667	2.77667	2.88333	3.13	15.2967	2.24667	2.39667	3.96333	2.29333	2.46333	3.69667	15.77	2.69	2.83	2.96	2.81333	2.33	2.89	10.6433	2.47333	2.19
300.387	3.57333	2.55667	2.09667	3.11667	4.35	3.18	2.4	3.21	2.24	2.80333	3.46667	9.84	3.06333	2.64333	5.09667	2.04	2.37667	3.39667	8.51	1.91	2.71667	3.08333	2.57333	2.46333	2.51667	13.6267	6.12667	4.28333	3.24667	2.80333	2.89333	3.13667	15.3267	2.26333	2.40667	3.96	2.29667	2.48	3.70333	15.7933	2.70333	2.83667	2.96667	2.82	2.34	2.90667	10.6667	2.48333	2.20333
300.755	3.58667	2.56667	2.09667	3.12333	4.38	3.19333	2.40333	3.21667	2.25667	2.81	3.47333	9.87667	3.07	2.65	5.10333	2.04667	2.38	3.39333	8.53667	1.92	2.72667	3.09333	2.58667	2.48	2.54	13.6433	6.13667	4.31	3.24667	2.80667	2.9	3.14333	15.37	2.27667	2.41667	3.96	2.28	2.47333	3.68667	15.7933	2.69333	2.82	2.95333	2.81667	2.32667	2.91	10.68	2.47667	2.19667
301.123	3.58	2.56333	2.1	3.12667	4.39333	3.19	2.40333	3.22	2.25	2.80667	3.46333	9.91	3.07667	2.65	5.11333	2.05	2.38667	3.39333	8.56333	1.93	2.73	3.09333	2.57333	2.48	2.55	13.6567	6.14	4.32333	3.25	2.8	2.88667	3.13333	15.4033	2.26667	2.42667	3.96667	2.27333	2.47	3.67667	15.81	2.69	2.81667	2.95333	2.82	2.32333	2.91333	10.6833	2.47	2.18667
301.492	3.59333	2.56667	2.12333	3.14	4.42	3.19333	2.42333	3.22667	2.26	2.81667	3.47667	9.94333	3.08667	2.65667	5.11	2.06333	2.40667	3.41	8.59333	1.94	2.73333	3.1	2.58	2.49	2.56667	13.7033	6.15667	4.33333	3.26333	2.81	2.90333	3.15	15.4433	2.27667	2.43667	3.98333	2.27667	2.47667	3.69	15.8467	2.7	2.83667	2.96667	2.83667	2.33333	2.92667	10.73	2.48333	2.19333
301.86	3.58667	2.56667	2.12	3.13	4.44333	3.19	2.42667	3.23667	2.26667	2.82333	3.47333	9.97333	3.09667	2.66	5.1	2.06667	2.41667	3.40667	8.60667	1.94333	2.74667	3.10667	2.58667	2.49333	2.58	13.7367	6.15667	4.35	3.27	2.8	2.91333	3.15	15.4667	2.28667	2.43667	3.98333	2.26667	2.47333	3.70667	15.86	2.70667	2.82667	2.97	2.82667	2.34	2.93	10.74	2.47667	2.19333
302.228	3.58667	2.57333	2.13	3.14333	4.48333	3.20667	2.44	3.24333	2.28333	2.83667	3.48667	10.0167	3.10667	2.67	5.12	2.07333	2.43	3.41667	8.64333	1.96	2.76667	3.11333	2.61	2.50667	2.58667	13.8033	6.19333	4.37667	3.27333	2.79333	2.92333	3.16333	15.5267	2.29667	2.45333	3.99333	2.27333	2.46333	3.7	15.9	2.70333	2.83	2.96667	2.81667	2.34667	2.92333	10.7633	2.47667	2.18667
302.596	3.58667	2.55667	2.12667	3.12667	4.49667	3.20667	2.44	3.24	2.27	2.83667	3.47333	10.0367	3.10667	2.66333	5.12667	2.07667	2.42667	3.41	8.67	1.94667	2.76333	3.1	2.60667	2.50667	2.58667	13.8233	6.18667	4.36667	3.28333	2.78667	2.91667	3.17333	15.5667	2.28667	2.45333	3.99333	2.28	2.47333	3.70333	15.9667	2.69667	2.84	2.97333	2.81667	2.36333	2.92333	10.7867	2.48333	2.19333
302.964	3.59667	2.57333	2.13667	3.12333	4.53667	3.23	2.45667	3.25	2.28667	2.84667	3.5	10.0633	3.11	2.67333	5.14333	2.09333	2.43333	3.42667	8.71667	1.96333	2.77333	3.11333	2.62333	2.52667	2.60333	13.8633	6.2	4.39667	3.3	2.79667	2.93333	3.18333	15.6067	2.3	2.46333	4.00667	2.28667	2.47	3.70667	16.0267	2.70667	2.84333	2.97667	2.83	2.37	2.93	10.8133	2.50333	2.20333
303.332	3.59	2.59	2.14	3.11667	4.56667	3.24	2.46	3.23333	2.28667	2.83667	3.49333	10.0867	3.11333	2.68	5.13667	2.09333	2.42667	3.42333	8.74	1.96	2.77	3.1	2.63	2.52333	2.6	13.87	6.19	4.40333	3.29667	2.79667	2.91667	3.17333	15.6133	2.3	2.46333	3.99	2.27	2.45333	3.69667	16.0467	2.69333	2.82333	2.96333	2.82	2.35	2.91	10.7967	2.49	2.19667
303.699	3.58333	2.59	2.13667	3.12333	4.58333	3.25667	2.45667	3.22667	2.27667	2.83	3.5	10.1233	3.10667	2.68	5.14667	2.09333	2.41667	3.43333	8.75667	1.96333	2.76667	3.08667	2.62667	2.53333	2.60667	13.8867	6.2	4.41	3.28667	2.79	2.90667	3.16667	15.65	2.29333	2.46	4	2.28333	2.45667	3.69333	16.11	2.7	2.83667	2.95333	2.82667	2.35	2.91333	10.8167	2.49	2.19333
304.067	3.58667	2.58333	2.13333	3.11667	4.59333	3.25667	2.45	3.20333	2.26667	2.81333	3.49333	10.1567	3.10333	2.67333	5.13	2.09667	2.41	3.44	8.76667	1.95667	2.75	3.07667	2.60667	2.52333	2.61	13.8667	6.19	4.39667	3.28333	2.79	2.89333	3.16667	15.65	2.27667	2.44667	4.00333	2.28333	2.44667	3.69	16.1333	2.69333	2.83	2.94667	2.83	2.33667	2.91333	10.7967	2.48667	2.2
304.435	3.59	2.59333	2.13333	3.13333	4.60667	3.25667	2.45	3.20667	2.26333	2.82333	3.49667	10.1833	3.09667	2.68	5.11667	2.09	2.40667	3.45	8.78667	1.97	2.75667	3.07667	2.61333	2.52	2.62	13.8767	6.19333	4.42333	3.27667	2.78667	2.89333	3.16333	15.6567	2.28667	2.45	4.02	2.29667	2.46333	3.70667	16.15	2.71667	2.85	2.95	2.84667	2.33667	2.93667	10.7967	2.50667	2.22
304.803	3.58	2.57667	2.12667	3.13	4.63	3.25333	2.43667	3.18667	2.25333	2.81333	3.48	10.2033	3.09	2.66333	5.10667	2.08	2.40333	3.44	8.77333	1.96333	2.75	3.06	2.61	2.51333	2.61667	13.8733	6.19	4.41667	3.26	2.77	2.89	3.15	15.6533	2.28333	2.43667	4.01667	2.29333	2.45	3.70333	16.1433	2.70333	2.85333	2.94333	2.82667	2.32667	2.91667	10.77	2.48667	2.21333
305.171	3.59667	2.58	2.14333	3.15	4.65333	3.27667	2.45	3.20667	2.26667	2.83333	3.5	10.2367	3.09667	2.67667	5.12	2.1	2.42	3.45333	8.79333	1.98	2.77333	3.07333	2.62333	2.54	2.63333	13.8967	6.21333	4.43667	3.27333	2.78333	2.90667	3.16	15.6967	2.29667	2.45667	4.03667	2.31333	2.48	3.71333	16.1833	2.71667	2.87333	2.95333	2.84333	2.34667	2.94333	10.7867	2.5	2.23
305.538	3.61	2.58	2.15333	3.15	4.68333	3.27333	2.46667	3.20333	2.26333	2.83667	3.49667	10.2567	3.10667	2.68667	5.12333	2.10667	2.43667	3.45	8.82	1.98333	2.79333	3.08	2.62667	2.54	2.64667	13.88	6.20333	4.43333	3.28333	2.78667	2.91	3.15667	15.7	2.30333	2.47	4.03333	2.32	2.48333	3.7	16.1367	2.72333	2.87667	2.96	2.83667	2.34667	2.94333	10.7667	2.51333	2.24667
305.906	3.59333	2.56667	2.14	3.14667	4.68667	3.25667	2.45333	3.20667	2.26333	2.82667	3.48	10.25	3.09333	2.68	5.11333	2.08667	2.43333	3.43	8.81333	1.97	2.79	3.06	2.61	2.52667	2.64	13.8667	6.18333	4.43	3.26	2.76333	2.9	3.13667	15.6767	2.29667	2.45333	4.03333	2.31667	2.49667	3.70333	16.1367	2.74	2.89667	2.95667	2.83667	2.36	2.95	10.78	2.52333	2.24667
306.274	3.59333	2.56	2.14333	3.14	4.71	3.27	2.46333	3.19333	2.27333	2.82667	3.48333	10.28	3.10333	2.68333	5.10667	2.09	2.44	3.42667	8.81333	1.97667	2.78667	3.05333	2.62	2.53	2.63667	13.86	6.19333	4.43333	3.26	2.77333	2.89667	3.13333	15.6433	2.29	2.44667	4.03	2.30667	2.48333	3.7	16.12	2.73	2.88	2.96667	2.82333	2.36333	2.93333	10.77	2.51333	2.23
306.641	3.59667	2.57667	2.14667	3.14	4.71	3.27667	2.47667	3.19667	2.28	2.82667	3.48667	10.2867	3.10667	2.69	5.10333	2.09667	2.45333	3.43333	8.83667	1.98333	2.80667	3.06	2.63	2.53333	2.66333	13.8367	6.2	4.43667	3.26333	2.78333	2.90333	3.14333	15.6233	2.3	2.46333	4.05333	2.32333	2.5	3.71	16.13	2.75333	2.89667	2.97667	2.84	2.38667	2.96	10.8	2.52667	2.23333
307.009	3.58333	2.55333	2.12333	3.12	4.70333	3.25667	2.45667	3.18	2.26333	2.82	3.46333	10.29	3.09667	2.67333	5.08667	2.08333	2.43667	3.40667	8.82333	1.97	2.78667	3.03667	2.60667	2.51333	2.65333	13.7833	6.18	4.42	3.24667	2.76667	2.88667	3.12333	15.59	2.27667	2.44333	4.04667	2.32333	2.49333	3.71	16.1	2.74667	2.89333	2.97667	2.83667	2.38	2.94	10.7867	2.53	2.23
307.376	3.57	2.54667	2.12	3.11667	4.71	3.26667	2.45667	3.19	2.26667	2.81	3.47333	10.3	3.1	2.67667	5.07667	2.07333	2.43667	3.40667	8.82333	1.98	2.78333	3.03333	2.61	2.51667	2.65667	13.7667	6.18667	4.44	3.24	2.76	2.89	3.13	15.5567	2.28	2.44	4.06333	2.31667	2.48333	3.71667	16.11	2.75333	2.89667	2.98	2.84	2.38	2.94	10.79	2.53	2.23333
307.744	3.58333	2.55	2.12	3.10667	4.71667	3.27333	2.46	3.18333	2.25667	2.80667	3.47	10.31	3.10333	2.68	5.07667	2.08	2.44	3.40667	8.83667	1.99667	2.77667	3.04	2.62	2.53667	2.66	13.76	6.2	4.45333	3.24667	2.76333	2.88333	3.13	15.57	2.28333	2.44667	4.07	2.30667	2.48667	3.70667	16.0833	2.74333	2.88667	2.97667	2.84	2.37333	2.93	10.7933	2.53667	2.23333
308.111	3.58	2.56	2.12	3.11	4.72333	3.28	2.46	3.18	2.25667	2.80333	3.47333	10.3467	3.11667	2.67667	5.08	2.08	2.44333	3.40667	8.83667	1.99	2.78333	3.04333	2.62333	2.53667	2.67667	13.7467	6.19667	4.47333	3.25333	2.76	2.89	3.13667	15.5967	2.28667	2.45333	4.06667	2.31333	2.47667	3.68667	16.0667	2.73667	2.88667	2.96333	2.83333	2.36333	2.93333	10.8067	2.54333	2.24667
308.479	3.57	2.56	2.11333	3.11	4.74	3.28333	2.45333	3.17667	2.25333	2.79667	3.47667	10.39	3.11667	2.68667	5.08333	2.08	2.45	3.39667	8.85333	1.98333	2.77667	3.03	2.61	2.53333	2.66667	13.77	6.19667	4.48333	3.25333	2.75	2.88667	3.13	15.6133	2.27667	2.44333	4.05667	2.29667	2.47	3.68	16.05	2.72333	2.87333	2.94667	2.81667	2.34333	2.91667	10.8067	2.53333	2.23333
308.846	3.57667	2.57333	2.13333	3.12667	4.75333	3.30333	2.46667	3.18333	2.26667	2.8	3.49333	10.4367	3.12667	2.69333	5.09667	2.08667	2.46	3.41	8.87333	2	2.80333	3.03333	2.61667	2.53667	2.68	13.7967	6.22	4.51333	3.25333	2.76	2.88333	3.13	15.62	2.29667	2.45	4.07667	2.3	2.46667	3.69	16.0633	2.72667	2.89	2.95333	2.82	2.34667	2.93	10.8433	2.54333	2.23333
309.213	3.58333	2.57	2.13	3.12667	4.76667	3.29667	2.47	3.16667	2.27	2.8	3.49	10.4733	3.12333	2.69333	5.11333	2.09	2.45667	3.40333	8.88667	2.00333	2.81333	3.02	2.61333	2.52333	2.68333	13.8067	6.23333	4.52667	3.24667	2.76	2.87333	3.12	15.6267	2.29333	2.46	4.07667	2.29333	2.47	3.68333	16.0633	2.72667	2.89333	2.94667	2.81333	2.34	2.93	10.8667	2.54333	2.23667
309.581	3.58333	2.58667	2.14667	3.13333	4.78667	3.31667	2.48	3.18333	2.29667	2.82333	3.50667	10.5367	3.14	2.70667	5.12333	2.10667	2.47	3.41667	8.92	2.02333	2.83667	3.02667	2.62	2.52333	2.70333	13.83	6.25667	4.54333	3.26333	2.77667	2.89	3.12333	15.6567	2.3	2.48	4.10667	2.32	2.48667	3.69333	16.13	2.74333	2.92	2.96	2.83	2.35333	2.94667	10.8933	2.56	2.24333
309.948	3.58333	2.59	2.14	3.12667	4.80667	3.32333	2.48667	3.19333	2.29333	2.81333	3.5	10.56	3.13667	2.71333	5.12	2.10667	2.47667	3.42333	8.95667	2.03667	2.83667	3.01667	2.61	2.52	2.69	13.8567	6.26667	4.54667	3.25667	2.77	2.87333	3.12	15.6733	2.3	2.47667	4.13667	2.32667	2.50333	3.72	16.19	2.76	2.94333	2.97667	2.84667	2.36	2.96333	10.9267	2.57	2.25
310.315	3.58667	2.59	2.14333	3.13667	4.83333	3.33333	2.48333	3.19	2.29667	2.81333	3.50333	10.6067	3.15	2.71333	5.13333	2.1	2.48	3.43	8.97333	2.05	2.84667	3.02	2.61333	2.53	2.69667	13.89	6.28	4.55667	3.25667	2.78333	2.87667	3.12667	15.7	2.31333	2.49	4.14333	2.33333	2.51	3.73	16.2533	2.76333	2.96333	2.98667	2.85333	2.37333	2.97	10.9533	2.57	2.26
310.682	3.6	2.59667	2.14667	3.13667	4.85667	3.33	2.49	3.2	2.30667	2.81333	3.5	10.6667	3.15333	2.72	5.15	2.10333	2.48333	3.43667	8.99	2.06	2.86	3.02	2.61	2.53	2.7	13.93	6.29	4.56333	3.25667	2.78	2.88	3.13667	15.7467	2.31	2.5	4.15	2.34333	2.52333	3.73	16.3133	2.78333	2.97667	2.99667	2.86	2.38	2.98333	10.97	2.57	2.27667
311.049	3.60333	2.60667	2.15333	3.13333	4.88	3.34667	2.49333	3.21333	2.30333	2.82	3.51	10.7267	3.16333	2.72667	5.15333	2.11333	2.49667	3.45	9.01	2.05667	2.86667	3.03	2.62	2.54333	2.72	13.9767	6.31	4.57333	3.26	2.78	2.89333	3.14	15.8267	2.32	2.50667	4.15667	2.35667	2.53	3.75	16.4	2.8	2.99667	3.01	2.87	2.38667	2.99	10.9933	2.58667	2.28667
311.417	3.61667	2.61667	2.16667	3.15	4.92333	3.35667	2.51	3.22	2.31	2.83667	3.52667	10.7933	3.17	2.74	5.16667	2.12	2.50333	3.47	9.03	2.06667	2.89333	3.03333	2.62333	2.55333	2.73667	14.0333	6.33667	4.58667	3.27333	2.78667	2.90333	3.16333	15.8867	2.35333	2.51667	4.15	2.34333	2.51333	3.74667	16.43	2.79333	2.99	3.00333	2.84667	2.37333	2.98	10.9967	2.56333	2.29
311.784	3.62667	2.61667	2.18	3.16667	4.96667	3.38333	2.52667	3.23667	2.32333	2.86	3.55	10.89	3.19	2.75	5.18667	2.13667	2.51667	3.49	9.05667	2.07333	2.92	3.05	2.63667	2.56667	2.77	14.09	6.35667	4.62	3.28667	2.78667	2.92667	3.16333	15.9833	2.36	2.53333	4.12667	2.33	2.49	3.73	16.48	2.79667	2.98	2.98333	2.82667	2.36	2.96667	11.01	2.55333	2.28
312.151	3.63333	2.62	2.18	3.15667	5	3.39667	2.54	3.25333	2.32	2.87333	3.55333	10.95	3.19333	2.76	5.18333	2.15	2.51667	3.5	9.08333	2.08667	2.93667	3.05333	2.63333	2.56667	2.78333	14.11	6.37	4.63	3.28	2.79	2.93	3.17333	16.04	2.36333	2.54	4.14667	2.33	2.48667	3.73333	16.53	2.82	2.98	2.98	2.83	2.36667	2.97667	11.03	2.58	2.29667
312.518	3.63333	2.61333	2.18	3.15667	5.04	3.41	2.54	3.24333	2.31667	2.87667	3.56333	11	3.21	2.77333	5.18333	2.15667	2.52	3.50667	9.10667	2.08667	2.93667	3.05333	2.64667	2.56667	2.79	14.1333	6.39333	4.64667	3.28333	2.80333	2.92667	3.18	16.08	2.37333	2.54	4.14667	2.32667	2.48333	3.73	16.5633	2.82	2.98333	2.96667	2.82333	2.36	2.96667	11.04	2.59333	2.29
312.885	3.63	2.61667	2.18333	3.15333	5.07333	3.42667	2.55	3.24333	2.31333	2.88333	3.56333	11.0667	3.21333	2.79	5.18667	2.16	2.52	3.51333	9.14333	2.09667	2.94	3.05333	2.64333	2.56667	2.78667	14.1567	6.40333	4.66667	3.29	2.8	2.92333	3.18667	16.1267	2.38	2.54	4.16333	2.34	2.5	3.72667	16.6033	2.83333	2.99667	2.96667	2.81667	2.37	2.98333	11.07	2.6	2.29333
313.252	3.62	2.6	2.18	3.14333	5.1	3.43667	2.56	3.23	2.31	2.86667	3.56	11.1333	3.23	2.79	5.19667	2.15667	2.51333	3.51	9.18	2.08667	2.94	3.04333	2.64	2.55333	2.78333	14.18	6.41667	4.68	3.27	2.8	2.92333	3.18667	16.16	2.37333	2.54667	4.18667	2.34667	2.52	3.74333	16.6567	2.85667	3.01333	2.97667	2.84	2.38	2.99333	11.11	2.62	2.3
313.618	3.63333	2.61333	2.18333	3.14	5.13333	3.44667	2.57333	3.22333	2.31333	2.87333	3.56333	11.1833	3.24333	2.81333	5.20667	2.16	2.52333	3.52667	9.21	2.10333	2.95	3.05333	2.64333	2.56333	2.79333	14.2167	6.45667	4.69333	3.27333	2.81	2.92	3.19667	16.2	2.39667	2.54667	4.20667	2.36	2.54	3.76	16.7	2.87333	3.03	2.98333	2.86	2.4	3	11.14	2.64333	2.31333
313.985	3.61667	2.61333	2.17333	3.13667	5.15	3.46333	2.58	3.21	2.32333	2.87	3.57333	11.25	3.25667	2.81333	5.22	2.16	2.53	3.53	9.22	2.10667	2.95333	3.04333	2.64333	2.54333	2.8	14.23	6.46667	4.7	3.27667	2.80333	2.92333	3.19333	16.2333	2.39667	2.53667	4.21333	2.37	2.55667	3.76	16.73	2.87333	3.04	2.98667	2.86667	2.4	3	11.14	2.64667	2.31667
314.352	3.61667	2.62	2.17333	3.14333	5.18667	3.47667	2.61	3.22333	2.32667	2.88667	3.57667	11.33	3.27667	2.82333	5.23333	2.15667	2.53667	3.54	9.24	2.12667	2.96333	3.03667	2.64333	2.54333	2.81333	14.2567	6.48333	4.72	3.27333	2.81	2.93	3.19	16.2833	2.41333	2.54667	4.21333	2.37	2.55667	3.77333	16.7367	2.88	3.04333	2.98667	2.86667	2.4	3.00333	11.17	2.65	2.33667
314.719	3.62	2.61667	2.17	3.14333	5.21	3.48	2.60667	3.21667	2.33333	2.86667	3.58	11.3933	3.28667	2.81667	5.23333	2.15333	2.53667	3.53667	9.24	2.13	2.96667	3.02	2.63	2.53	2.81	14.2833	6.50333	4.71667	3.26	2.80667	2.93333	3.18	16.2967	2.40667	2.53667	4.21333	2.37667	2.54667	3.77333	16.7533	2.88333	3.04	2.97333	2.87	2.39	2.98667	11.1867	2.64333	2.33
315.086	3.62	2.61333	2.16	3.13667	5.22333	3.47333	2.59333	3.21333	2.32	2.85667	3.56	11.4367	3.28	2.81667	5.22	2.14333	2.52667	3.53	9.24667	2.14	2.96667	3.01	2.61333	2.51667	2.80667	14.29	6.50667	4.71667	3.25	2.79	2.93	3.16667	16.3067	2.39333	2.51667	4.2	2.36333	2.54667	3.77	16.7567	2.88333	3.04	2.96333	2.86333	2.38333	2.97667	11.1967	2.65333	2.34
315.452	3.61	2.61333	2.15667	3.13333	5.24667	3.47667	2.59	3.21667	2.33	2.86333	3.56333	11.4967	3.29667	2.82	5.22667	2.14	2.53	3.52667	9.25333	2.14333	2.97667	3	2.60667	2.51667	2.80667	14.3133	6.51667	4.72667	3.24667	2.8	2.93333	3.15667	16.3333	2.39	2.53	4.19667	2.36333	2.55	3.78	16.7567	2.89	3.04667	2.96333	2.84667	2.38	2.97667	11.21	2.65333	2.34333
315.819	3.63	2.61667	2.17	3.15333	5.28667	3.49333	2.6	3.22333	2.33	2.87	3.58	11.5667	3.31667	2.85	5.23667	2.15333	2.55	3.52667	9.31333	2.16333	3	3.00333	2.60667	2.52667	2.81667	14.37	6.54333	4.74667	3.24667	2.80667	2.93667	3.17333	16.4067	2.40667	2.55	4.20333	2.36667	2.54333	3.79	16.7833	2.9	3.05667	2.97	2.84667	2.39	2.98	11.2533	2.65	2.34667
316.186	3.61667	2.61	2.16333	3.14333	5.32	3.5	2.6	3.21333	2.32333	2.86667	3.58667	11.62	3.31	2.83667	5.23	2.14667	2.55	3.52	9.35	2.16667	3.00667	3	2.6	2.52667	2.82	14.4233	6.54667	4.76	3.23667	2.8	2.94	3.17667	16.4667	2.41	2.54333	4.22	2.37	2.54333	3.79	16.82	2.91333	3.07667	2.98	2.85333	2.39333	2.98667	11.2767	2.65	2.34333
316.552	3.60333	2.60667	2.16	3.14	5.35	3.50333	2.59667	3.21	2.32	2.87333	3.58333	11.67	3.32	2.84	5.23667	2.14667	2.53667	3.50333	9.37667	2.16333	3.01	2.99667	2.6	2.53	2.82	14.4733	6.55667	4.76667	3.23333	2.79667	2.93	3.17333	16.5433	2.4	2.53667	4.22	2.37333	2.55667	3.79667	16.8667	2.93	3.09	2.99	2.85667	2.39667	2.99333	11.2967	2.65667	2.36
316.919	3.61333	2.63	2.16333	3.15	5.39333	3.53333	2.61	3.22	2.33	2.9	3.61333	11.7433	3.34333	2.86333	5.26333	2.16	2.54667	3.50333	9.40667	2.18	3.04333	2.99667	2.61333	2.55	2.83333	14.5533	6.59333	4.79333	3.24	2.81667	2.95	3.19667	16.6467	2.42	2.56333	4.24333	2.39667	2.56333	3.80333	16.9133	2.94333	3.10667	2.99333	2.85333	2.4	2.99333	11.3333	2.66333	2.36667
317.285	3.60333	2.61333	2.16333	3.14333	5.43333	3.53	2.61667	3.20667	2.32	2.89333	3.61333	11.79	3.34	2.86333	5.25	2.16	2.54333	3.50333	9.44333	2.18333	3.04	2.98	2.60667	2.54	2.83667	14.61	6.59333	4.8	3.22	2.81333	2.94667	3.2	16.73	2.41333	2.56	4.24667	2.4	2.57	3.80333	16.95	2.95	3.11	2.98667	2.85	2.40333	3	11.3533	2.67	2.36333
317.652	3.60333	2.60333	2.16	3.13333	5.47667	3.53667	2.62	3.20333	2.32	2.89333	3.61	11.8567	3.33667	2.86333	5.26	2.15	2.54	3.50667	9.46667	2.18667	3.03	2.97333	2.6	2.53667	2.84	14.6667	6.60333	4.81	3.21333	2.82	2.95333	3.19333	16.8067	2.41333	2.55667	4.24667	2.41	2.57667	3.80333	16.98	2.96	3.12333	2.97667	2.85	2.4	3	11.39	2.67333	2.35667
318.018	3.60667	2.61333	2.16667	3.13	5.52333	3.54333	2.62	3.20667	2.32	2.89667	3.61667	11.9167	3.35667	2.87667	5.25667	2.15667	2.54333	3.51333	9.51333	2.19667	3.04667	2.98	2.60333	2.53	2.85	14.74	6.61667	4.80667	3.21667	2.82667	2.96667	3.19	16.9333	2.42667	2.55667	4.24667	2.41333	2.57667	3.81	17.0333	2.96667	3.12333	2.97333	2.84	2.4	2.99333	11.4267	2.68667	2.35667
318.384	3.62333	2.62333	2.18	3.13667	5.57333	3.57	2.64667	3.21667	2.34333	2.91333	3.64	11.99	3.37333	2.9	5.27667	2.17	2.57	3.53667	9.58333	2.21667	3.06333	2.98667	2.61667	2.54667	2.87333	14.8267	6.63	4.83667	3.23	2.84333	2.99	3.21	17.0667	2.45333	2.56667	4.26333	2.42333	2.58333	3.82333	17.0967	2.98	3.13333	2.98	2.84	2.42333	3.00667	11.4833	2.71	2.36333
318.751	3.61333	2.60333	2.18	3.13333	5.62333	3.57667	2.63333	3.20667	2.34333	2.89667	3.63333	12.06	3.37333	2.89667	5.26	2.16	2.56667	3.54333	9.63333	2.21667	3.05333	2.97333	2.6	2.54333	2.87333	14.8967	6.63333	4.84	3.21333	2.83667	2.99333	3.18333	17.19	2.45333	2.56	4.26333	2.42667	2.59	3.84667	17.1667	3	3.15667	2.99	2.85333	2.44	3.01333	11.5333	2.73333	2.37667
319.117	3.62	2.61	2.17	3.13333	5.67667	3.59	2.64667	3.20333	2.34667	2.89	3.63667	12.13	3.38333	2.90667	5.25667	2.16	2.56333	3.53333	9.69	2.22667	3.05333	2.97	2.59667	2.54667	2.87333	14.9633	6.64	4.85667	3.20667	2.83667	2.99667	3.18	17.3233	2.46667	2.56667	4.26667	2.44	2.6	3.86	17.2567	3.01667	3.17	3	2.86667	2.44333	3.01667	11.57	2.73667	2.37667
319.483	3.61333	2.60667	2.17333	3.12667	5.72333	3.6	2.64333	3.20333	2.35	2.89	3.64	12.1733	3.39	2.89667	5.24667	2.15667	2.56	3.53667	9.73	2.23	3.06667	2.98	2.59333	2.55333	2.87667	15.06	6.64667	4.86333	3.20333	2.83	3	3.18667	17.4533	2.46667	2.57667	4.27333	2.42333	2.6	3.85667	17.32	3.02	3.17	3	2.86	2.44	3.01667	11.6	2.74333	2.38333
319.85	3.60667	2.58667	2.16	3.13	5.75	3.6	2.64333	3.2	2.34667	2.88	3.63333	12.2267	3.39	2.9	5.23667	2.15	2.55	3.52667	9.77667	2.23	3.06	2.96333	2.58667	2.55667	2.86667	15.12	6.66333	4.87	3.19	2.82	2.98	3.19	17.5567	2.46	2.57667	4.26	2.42	2.59667	3.85667	17.3733	3.02	3.18	2.99	2.85667	2.43333	3.00333	11.63	2.74333	2.38
320.216	3.59333	2.58333	2.16	3.12667	5.79333	3.59667	2.64333	3.19667	2.34	2.87	3.62333	12.2767	3.39	2.9	5.23	2.14667	2.53667	3.52	9.81667	2.23667	3.06667	2.96333	2.58333	2.55	2.87333	15.1933	6.67667	4.87333	3.17667	2.81333	2.98	3.19	17.64	2.45333	2.58	4.23333	2.40333	2.59333	3.83333	17.3767	3.01	3.16	2.95333	2.83333	2.41667	2.98	11.6367	2.72333	2.35667
320.582	3.59333	2.58667	2.16	3.11667	5.84333	3.6	2.65667	3.20333	2.33667	2.87667	3.62333	12.3467	3.39667	2.90333	5.24	2.14667	2.54	3.52	9.86667	2.24667	3.07333	2.97	2.57667	2.55667	2.87667	15.2633	6.69	4.88333	3.18333	2.81667	2.96333	3.19333	17.74	2.46333	2.57333	4.21	2.39	2.57333	3.80333	17.4033	3.00333	3.14667	2.92333	2.81333	2.40667	2.97333	11.6667	2.7	2.33333
320.948	3.58667	2.57333	2.17333	3.11667	5.9	3.60667	2.65667	3.2	2.33333	2.88	3.61333	12.3933	3.39667	2.89667	5.23	2.14333	2.54667	3.52	9.90333	2.25667	3.08333	2.96	2.56667	2.55333	2.87667	15.2967	6.7	4.88333	3.18667	2.81333	2.95333	3.19333	17.7933	2.46333	2.56333	4.20667	2.37667	2.57	3.79333	17.41	3.01333	3.15333	2.91	2.8	2.40333	2.96333	11.71	2.69667	2.33333
321.314	3.58	2.56667	2.17	3.11333	5.96667	3.61	2.66	3.19	2.32	2.87667	3.61333	12.4367	3.39667	2.90667	5.23	2.13333	2.54	3.52	9.94667	2.26	3.08	2.94	2.56667	2.55333	2.88333	15.33	6.7	4.88667	3.17667	2.81333	2.94	3.19333	17.86	2.46667	2.56	4.2	2.38	2.57333	3.78333	17.4533	3.02	3.16333	2.90333	2.79667	2.39667	2.96	11.7533	2.7	2.34
321.68	3.58	2.56667	2.17333	3.09667	6.05333	3.61	2.66333	3.18333	2.32333	2.88333	3.59667	12.4667	3.41	2.9	5.23	2.13333	2.54333	3.51	9.98333	2.26333	3.08667	2.94667	2.56	2.54667	2.88333	15.36	6.70667	4.9	3.17667	2.81667	2.93667	3.18333	17.9467	2.46333	2.56	4.21	2.39333	2.58	3.78667	17.53	3.03667	3.17667	2.90333	2.80667	2.4	2.96333	11.7933	2.70333	2.35333
322.046	3.57	2.56	2.16	3.09	6.17	3.61	2.66333	3.16667	2.31667	2.87667	3.58667	12.4867	3.4	2.90333	5.20333	2.12	2.54667	3.5	10.0167	2.26667	3.08667	2.92667	2.54333	2.54333	2.89	15.34	6.7	4.89333	3.16667	2.80667	2.92333	3.16	18.04	2.45667	2.55	4.21333	2.39667	2.57333	3.78	17.6267	3.04333	3.19	2.91	2.81333	2.4	2.96333	11.8167	2.71667	2.35333
322.412	3.55333	2.53667	2.15667	3.08	6.28333	3.60667	2.65333	3.14333	2.31	2.86667	3.58667	12.49	3.39667	2.90333	5.17333	2.11667	2.54	3.48333	10.0433	2.25	3.08	2.91667	2.53333	2.53	2.89	15.32	6.69	4.89333	3.14667	2.79667	2.92333	3.13667	18.1633	2.44667	2.54667	4.22333	2.39667	2.58	3.79333	17.75	3.05333	3.20333	2.92333	2.80333	2.39	2.95667	11.84	2.71667	2.35333
322.778	3.53333	2.54333	2.15	3.07	6.42333	3.61333	2.65667	3.15	2.31333	2.85333	3.58	12.5467	3.40333	2.91	5.17333	2.11	2.54667	3.47667	10.11	2.25333	3.08333	2.90667	2.53333	2.52667	2.90667	15.3933	6.71	4.90667	3.13333	2.79333	2.91	3.13667	18.34	2.45	2.55	4.23667	2.39667	2.58	3.79667	17.9167	3.06333	3.20667	2.91667	2.81667	2.39333	2.96333	11.8867	2.72667	2.36667
323.144	3.52333	2.54	2.14	3.06	6.57333	3.60667	2.65333	3.13667	2.30667	2.84667	3.57333	12.6067	3.42	2.91667	5.16	2.12	2.54	3.47667	10.22	2.25333	3.08667	2.91	2.52333	2.51667	2.9	15.48	6.73333	4.91333	3.12333	2.78667	2.91	3.12333	18.5233	2.44667	2.55	4.24	2.39333	2.57	3.80333	18.08	3.06667	3.21667	2.93	2.81333	2.4	2.96	11.95	2.72667	2.36667
323.51	3.52667	2.54667	2.15333	3.07333	6.74333	3.63333	2.66	3.15667	2.32667	2.86	3.6	12.75	3.43333	2.95	5.17	2.13333	2.55667	3.48333	10.39	2.27	3.11	2.90667	2.53667	2.52667	2.91333	15.6667	6.79	4.94	3.13333	2.79667	2.92333	3.13	18.78	2.46333	2.56667	4.24333	2.38667	2.56333	3.79333	18.2933	3.07667	3.21	2.92	2.80667	2.4	2.96	12.0733	2.73667	2.35667
323.876	3.54	2.54333	2.16	3.08333	6.90333	3.66	2.67	3.16667	2.33	2.86	3.6	12.9233	3.46333	2.96	5.18	2.13	2.56	3.5	10.58	2.28333	3.11667	2.91333	2.54333	2.53	2.92	15.9467	6.84333	4.98	3.13333	2.80667	2.92333	3.13667	19.0133	2.48	2.58333	4.24667	2.38333	2.57	3.80333	18.5167	3.1	3.23	2.91333	2.80667	2.39667	2.97	12.2533	2.73333	2.36333
324.242	3.55667	2.55333	2.16	3.09	7.08667	3.68667	2.68333	3.17333	2.34667	2.88	3.60667	13.1233	3.48667	2.97	5.19667	2.13	2.55333	3.51	10.8133	2.30333	3.14	2.91333	2.55333	2.52667	2.92333	16.2733	6.9	5.00333	3.15	2.81333	2.93667	3.15	19.2633	2.49	2.59667	4.24333	2.37667	2.56	3.80667	18.76	3.10333	3.23333	2.90667	2.81	2.39667	2.96	12.4533	2.74	2.36
324.607	3.57667	2.55667	2.15333	3.09333	7.27333	3.70667	2.69667	3.17	2.35	2.88	3.61333	13.34	3.49667	2.98667	5.19333	2.13667	2.55333	3.51333	11.06	2.32	3.15	2.91667	2.56333	2.52667	2.93	16.57	6.92	5.03	3.14667	2.82	2.94333	3.14667	19.5267	2.49667	2.6	4.23667	2.39	2.55333	3.80667	19.04	3.11667	3.24667	2.90667	2.80333	2.39	2.96333	12.6967	2.74333	2.34667
324.973	3.58	2.56667	2.15333	3.1	7.49333	3.74667	2.70667	3.17333	2.35667	2.89	3.63667	13.5867	3.49667	2.99	5.21667	2.14	2.56	3.51	11.33	2.33333	3.16333	2.91667	2.56667	2.53	2.94	16.9433	6.96	5.06667	3.15333	2.82667	2.97	3.15667	19.8433	2.51333	2.60667	4.24667	2.39333	2.55667	3.80333	19.3667	3.13667	3.26	2.90333	2.81	2.39667	2.97333	12.9767	2.75	2.35333
325.339	3.58667	2.56667	2.14667	3.10667	7.74	3.75	2.71667	3.16333	2.35	2.89667	3.65	13.8233	3.52	2.98333	5.21333	2.14	2.55333	3.51333	11.5967	2.35667	3.16	2.90667	2.56667	2.52	2.94667	17.31	6.99333	5.08667	3.15333	2.81667	2.95667	3.15667	20.1467	2.51667	2.6	4.25333	2.41	2.56667	3.82667	19.7033	3.16667	3.27667	2.92333	2.81333	2.4	2.97	13.2567	2.75667	2.36333
325.704	3.59	2.56	2.14333	3.10333	8.01667	3.76	2.72667	3.16667	2.35667	2.89667	3.67	14.09	3.53	2.98667	5.23	2.15	2.56	3.51667	11.93	2.36333	3.16667	2.91333	2.57667	2.51667	2.96	17.7133	7.04	5.11	3.15333	2.82	2.97	3.17	20.5433	2.52	2.59667	4.27667	2.42333	2.57333	3.84667	20.1333	3.19667	3.29333	2.94	2.83333	2.42333	2.99333	13.5767	2.78333	2.39
326.07	3.59	2.56667	2.15	3.11	8.33667	3.77333	2.72667	3.17667	2.35667	2.90333	3.68667	14.36	3.55	2.99333	5.24667	2.16	2.57333	3.52667	12.28	2.38	3.17667	2.92333	2.58333	2.52333	2.98	18.17	7.09333	5.12667	3.15667	2.82667	2.97333	3.18333	20.96	2.54333	2.59333	4.29	2.44333	2.59333	3.85333	20.58	3.23333	3.30667	2.94	2.83667	2.44333	3.01333	13.9133	2.79667	2.4
326.436	3.59	2.57667	2.15667	3.11	8.69667	3.79333	2.73333	3.18333	2.35667	2.91333	3.71	14.6367	3.58	2.99333	5.26667	2.16333	2.56	3.53333	12.65	2.39	3.19333	2.92333	2.58667	2.52667	2.98667	18.6567	7.16333	5.15667	3.17	2.83	2.96667	3.19	21.4267	2.54	2.6	4.30667	2.44667	2.59333	3.87333	21.0633	3.25667	3.32	2.95	2.85	2.45	3.02333	14.2633	2.80667	2.42
326.801	3.61333	2.58333	2.17333	3.12667	9.09	3.82333	2.75333	3.2	2.36667	2.92667	3.71667	14.93	3.60333	3.01333	5.28333	2.17333	2.57333	3.55333	13.0333	2.41	3.21667	2.92333	2.6	2.54	3.01333	19.16	7.24333	5.18667	3.18	2.83333	2.96333	3.2	21.9433	2.56667	2.60667	4.32667	2.45333	2.60667	3.88667	21.5833	3.29333	3.33667	2.96	2.86667	2.46333	3.04	14.61	2.81667	2.42667
327.167	3.62333	2.61	2.19	3.14333	9.54333	3.84667	2.77333	3.22667	2.38667	2.95667	3.74	15.24	3.64	3.05	5.31333	2.17667	2.59667	3.58	13.4433	2.42667	3.23667	2.94333	2.60333	2.56	3.04	19.68	7.31667	5.24333	3.19333	2.86	2.98667	3.22	22.5467	2.6	2.63	4.34	2.44667	2.60667	3.88667	22.1667	3.30333	3.34667	2.95667	2.86333	2.45333	3.05	14.9667	2.82333	2.42333
327.532	3.64	2.62333	2.2	3.15667	10.01	3.87333	2.79	3.23667	2.4	2.96333	3.75	15.5	3.65333	3.06333	5.32667	2.18667	2.61667	3.59333	13.81	2.44333	3.26	2.94333	2.61333	2.56667	3.06	20.1333	7.38333	5.28667	3.21	2.87333	3.00333	3.22333	23.15	2.62	2.65333	4.35333	2.45333	2.62	3.89333	22.7233	3.33667	3.36333	2.97333	2.87333	2.46	3.06	15.3	2.84	2.42333
327.897	3.64667	2.62667	2.21333	3.17	10.5067	3.89667	2.80333	3.23667	2.40333	2.97333	3.75333	15.7567	3.67333	3.08667	5.33333	2.19333	2.62667	3.60333	14.2067	2.47333	3.28333	2.96333	2.61667	2.57667	3.07333	20.59	7.43	5.32333	3.22333	2.88	3.01667	3.22667	23.8167	2.62667	2.67667	4.38333	2.46667	2.63333	3.91333	23.35	3.36333	3.39667	2.99333	2.88667	2.46333	3.06667	15.6367	2.86	2.44
328.263	3.65333	2.62333	2.22667	3.18333	11.01	3.90333	2.81	3.24333	2.41333	2.97667	3.75	15.9967	3.68667	3.10333	5.33667	2.19	2.64667	3.61	14.5933	2.47667	3.29333	2.96667	2.61667	2.56667	3.10333	21.02	7.46667	5.34333	3.21333	2.88667	3.02333	3.21667	24.4833	2.64	2.68333	4.37667	2.47333	2.64333	3.92	23.93	3.39	3.40667	3	2.87667	2.46667	3.07	15.94	2.88	2.44333
328.628	3.64333	2.62333	2.21667	3.17333	11.53	3.90667	2.8	3.23	2.40333	2.96667	3.74667	16.2333	3.7	3.10667	5.33	2.18667	2.64	3.62	15.0133	2.48	3.29	2.97	2.61	2.55333	3.11333	21.4633	7.49333	5.35667	3.20667	2.88	3.02333	3.20667	25.1	2.63	2.67333	4.35333	2.46667	2.62667	3.90667	24.4633	3.39	3.39333	2.98333	2.86	2.44667	3.06333	16.25	2.87333	2.43333
328.993	3.62667	2.61	2.21333	3.15333	12.0633	3.91333	2.79	3.21667	2.39667	2.95333	3.73333	16.46	3.68333	3.1	5.32	2.19667	2.62667	3.61	15.43	2.48	3.3	2.96333	2.59667	2.53667	3.12333	21.96	7.51	5.34667	3.19667	2.86667	3.00667	3.19333	25.69	2.61667	2.66	4.34667	2.47333	2.63333	3.91	25.0233	3.40667	3.39	2.99	2.85333	2.45	3.07	16.6	2.89	2.44667
329.359	3.61	2.6	2.20333	3.13	12.59	3.92	2.77667	3.21	2.38667	2.95667	3.72667	16.74	3.7	3.10333	5.30667	2.19	2.62	3.60333	15.9	2.47333	3.30667	2.95	2.59	2.53333	3.12667	22.5133	7.51	5.34667	3.19667	2.86333	3	3.18	26.3067	2.60667	2.64667	4.34333	2.48667	2.62667	3.91333	25.6033	3.4	3.38	2.98	2.84667	2.44667	3.05667	16.98	2.88667	2.44333
329.724	3.60333	2.58667	2.18333	3.11667	13.14	3.91333	2.76667	3.20333	2.37333	2.94	3.71667	17.0533	3.7	3.09667	5.29	2.18	2.61333	3.59667	16.3933	2.46	3.29333	2.92667	2.57667	2.52	3.13333	23.1033	7.51	5.34333	3.17333	2.85	2.98667	3.16333	26.9267	2.59667	2.62667	4.31667	2.47	2.62	3.89667	26.1767	3.39667	3.36333	2.98	2.83667	2.43333	3.04667	17.3767	2.88	2.43333
330.089	3.59667	2.58667	2.16333	3.1	13.7233	3.91333	2.76667	3.19333	2.37333	2.93333	3.71	17.3767	3.69333	3.08333	5.27667	2.18333	2.60333	3.60333	16.91	2.46	3.29333	2.91333	2.56667	2.52667	3.13333	23.7633	7.51	5.34667	3.17	2.84	2.98333	3.16667	27.6133	2.59	2.62	4.31333	2.46667	2.60333	3.89	26.8333	3.39333	3.35667	2.97333	2.83	2.42667	3.03333	17.8233	2.86667	2.42667
330.454	3.59667	2.57333	2.16	3.10333	14.3433	3.91667	2.78	3.2	2.38	2.94	3.72333	17.72	3.69667	3.08333	5.26667	2.18333	2.61	3.6	17.4467	2.47333	3.29667	2.91	2.56667	2.54	3.13	24.4533	7.52333	5.36	3.16667	2.85333	2.97667	3.17	28.36	2.59667	2.62333	4.33667	2.48667	2.62667	3.91667	27.54	3.41667	3.38	2.99333	2.85333	2.44667	3.04667	18.29	2.89333	2.45667
330.819	3.58333	2.56	2.16	3.09333	14.9733	3.91667	2.78	3.19	2.36667	2.92667	3.72667	18.0633	3.69	3.07333	5.26	2.16667	2.60667	3.60333	17.9833	2.47667	3.28333	2.90333	2.56	2.53667	3.13	25.1367	7.53667	5.36667	3.15333	2.83667	2.97	3.17	29.1433	2.59333	2.61333	4.33667	2.47333	2.61667	3.90667	28.22	3.42333	3.37667	2.98333	2.85	2.44	3.03333	18.7233	2.88667	2.44333
331.184	3.58333	2.56	2.16	3.09333	15.6367	3.91667	2.78667	3.18333	2.37	2.91333	3.73	18.42	3.68333	3.08333	5.25667	2.16667	2.59667	3.6	18.5367	2.48	3.27333	2.89	2.55	2.53667	3.13333	25.8467	7.55333	5.36333	3.13667	2.83333	2.97667	3.16667	29.9733	2.6	2.62	4.33667	2.46667	2.62	3.91	28.93	3.44333	3.38667	2.98333	2.85333	2.43667	3.04333	19.16	2.89333	2.45
331.55	3.6	2.57667	2.17667	3.09667	16.3167	3.94333	2.8	3.18	2.38	2.92333	3.74	18.7533	3.68333	3.09333	5.25667	2.17	2.60667	3.60333	19.08	2.49	3.28667	2.89	2.56	2.55333	3.15	26.56	7.59	5.38	3.15667	2.84	2.98333	3.18	30.8333	2.61667	2.62333	4.33333	2.45667	2.61667	3.90667	29.67	3.45	3.38333	2.96667	2.85333	2.42333	3.05333	19.6067	2.88667	2.45333
331.915	3.58333	2.56667	2.18333	3.08333	17.0133	3.94	2.78333	3.18	2.37	2.91667	3.73	19.1067	3.69	3.1	5.25667	2.16667	2.60333	3.59333	19.6233	2.5	3.27333	2.88333	2.55	2.53667	3.14333	27.2933	7.61333	5.39667	3.13667	2.83	2.97667	3.17333	31.6833	2.61667	2.61667	4.33667	2.44667	2.62	3.9	30.38	3.47	3.37333	2.96667	2.85333	2.42	3.05667	20.0333	2.89667	2.45333
332.279	3.57667	2.56333	2.17333	3.08	17.6867	3.92333	2.77667	3.17	2.37333	2.90667	3.72333	19.4233	3.69	3.08333	5.24	2.15333	2.59	3.59	20.15	2.49667	3.26333	2.86333	2.53667	2.54	3.13333	28.0167	7.62667	5.40333	3.12	2.81667	2.97	3.16667	32.52	2.61667	2.61	4.31667	2.43	2.61	3.89	31.1133	3.46	3.37	2.95333	2.83333	2.4	3.04333	20.49	2.88	2.43333
332.644	3.58333	2.56	2.16333	3.08333	18.38	3.93667	2.77667	3.16333	2.37333	2.90333	3.71333	19.76	3.7	3.08667	5.23667	2.15333	2.59	3.59667	20.69	2.49	3.27	2.86	2.53333	2.53333	3.14	28.7567	7.64	5.42333	3.11333	2.82	2.96667	3.17	33.41	2.61667	2.60667	4.31667	2.43667	2.62667	3.89667	31.9	3.46667	3.38333	2.97	2.83667	2.41667	3.04333	20.96	2.89	2.44333
333.009	3.57667	2.56667	2.15	3.08333	19.08	3.94	2.77	3.16333	2.37333	2.90667	3.70667	20.09	3.72	3.07667	5.23667	2.14667	2.58667	3.6	21.2433	2.49667	3.28	2.86	2.53333	2.53667	3.14333	29.4933	7.64333	5.43333	3.09	2.81667	2.95	3.16667	34.25	2.61333	2.59333	4.31	2.42667	2.62	3.89	32.6533	3.46333	3.36667	2.96	2.83	2.41333	3.03667	21.4067	2.87667	2.43
333.374	3.54667	2.54	2.13667	3.06667	19.7767	3.91	2.75667	3.15667	2.36333	2.88667	3.68667	20.4167	3.71667	3.06	5.23	2.13667	2.57667	3.59	21.7567	2.49667	3.26333	2.84333	2.51333	2.51667	3.13333	30.2367	7.63	5.44	3.07333	2.79667	2.93	3.15333	35.1033	2.60667	2.59333	4.31333	2.44	2.62667	3.89333	33.3833	3.46667	3.37	2.96333	2.82667	2.43333	3.03	21.84	2.88	2.43
333.739	3.54333	2.54333	2.12333	3.06667	20.4633	3.91	2.76333	3.15667	2.36	2.89	3.69	20.76	3.73	3.05	5.23667	2.13667	2.57333	3.58667	22.3033	2.49667	3.26333	2.84333	2.52333	2.52333	3.14	30.9767	7.63333	5.43667	3.08667	2.80667	2.93667	3.15333	35.9967	2.59333	2.59333	4.3	2.43	2.61667	3.89667	34.0967	3.45333	3.36333	2.95	2.82333	2.42	3.03	22.2733	2.87667	2.41667
334.104	3.53667	2.54667	2.12667	3.05333	21.1667	3.93	2.76	3.15333	2.34667	2.89667	3.68	21.0867	3.74333	3.07333	5.25667	2.14667	2.57333	3.59333	22.8367	2.5	3.27	2.85	2.52333	2.52333	3.15333	31.7133	7.64667	5.44333	3.08333	2.8	2.94333	3.15667	36.86	2.60333	2.6	4.30667	2.43333	2.62	3.9	34.7767	3.45667	3.36667	2.94667	2.82667	2.43667	3.03	22.6767	2.88667	2.41667
334.468	3.53333	2.54667	2.14	3.05333	21.8467	3.93	2.76333	3.14667	2.34	2.9	3.67667	21.4133	3.74667	3.06667	5.25667	2.14667	2.57333	3.58	23.3833	2.50667	3.26667	2.84	2.51667	2.51667	3.15333	32.44	7.63667	5.43	3.08667	2.80667	2.94333	3.15	37.7267	2.60333	2.60333	4.32333	2.43667	2.62667	3.91333	35.4833	3.46333	3.36333	2.95333	2.83333	2.43333	3.03	23.0967	2.88333	2.41333
334.833	3.53333	2.55667	2.14333	3.05333	22.5233	3.92667	2.76667	3.14333	2.34333	2.89333	3.68333	21.72	3.74667	3.07	5.25667	2.14667	2.57667	3.58	23.88	2.50667	3.26667	2.84	2.52	2.51333	3.15333	33.1633	7.64667	5.43	3.09333	2.80333	2.94667	3.15333	38.61	2.61	2.60333	4.32333	2.45	2.61667	3.91333	36.1533	3.46667	3.36333	2.95667	2.85	2.43333	3.02333	23.4933	2.88333	2.42
335.198	3.55	2.56667	2.15	3.05333	23.21	3.94	2.77667	3.15667	2.34667	2.9	3.7	22.01	3.74667	3.08	5.26667	2.13333	2.58	3.59333	24.41	2.51	3.27333	2.83	2.52	2.53	3.15667	33.89	7.66	5.44333	3.09	2.81333	2.95667	3.16333	39.4333	2.61	2.60667	4.32333	2.45333	2.62667	3.92333	36.8033	3.48	3.37333	2.97	2.85	2.43	3.02333	23.8933	2.89333	2.42667
335.562	3.56	2.56667	2.15667	3.07	23.8733	3.93667	2.78	3.15667	2.35333	2.89667	3.72667	22.3067	3.74333	3.09333	5.26	2.13333	2.58333	3.6	24.88	2.51333	3.28667	2.83333	2.52667	2.52	3.15	34.57	7.67667	5.44	3.09	2.81667	2.95333	3.15667	40.2467	2.63	2.61333	4.33	2.46667	2.64667	3.93667	37.48	3.49333	3.39	2.98333	2.85333	2.44667	3.04	24.2767	2.91	2.45
335.927	3.54667	2.55667	2.15	3.06333	24.5033	3.92333	2.77333	3.15333	2.35	2.89667	3.72333	22.59	3.73667	3.07667	5.25333	2.12333	2.56667	3.58333	25.3533	2.50333	3.27333	2.83	2.51667	2.5	3.14667	35.2467	7.66667	5.43333	3.08333	2.80667	2.94667	3.14333	41.0467	2.61	2.59667	4.33333	2.47333	2.65	3.94	38.1467	3.49667	3.38667	2.99667	2.85	2.44	3.04667	24.6433	2.90333	2.45333
336.291	3.55333	2.55333	2.14333	3.06333	25.1233	3.92333	2.79	3.16333	2.36	2.90667	3.73667	22.8567	3.74333	3.10333	5.25667	2.12	2.59	3.58667	25.79	2.51333	3.27	2.84333	2.52333	2.52	3.16	35.89	7.68333	5.44	3.09	2.81333	2.96	3.14333	41.76	2.62	2.61	4.32667	2.47333	2.64333	3.92667	38.7333	3.48667	3.39333	2.98333	2.84	2.43333	3.04333	24.96	2.89667	2.45333
336.656	3.56	2.54333	2.14	3.07	25.7133	3.93	2.79	3.15667	2.36	2.91	3.73	23.0967	3.73667	3.1	5.25333	2.13333	2.6	3.58	26.18	2.51667	3.28	2.84333	2.52333	2.52667	3.16	36.4533	7.68667	5.42667	3.09	2.80667	2.96	3.13333	42.4233	2.61667	2.6	4.33667	2.46667	2.64	3.92	39.2733	3.47667	3.38333	2.98	2.83667	2.43667	3.03667	25.2567	2.90333	2.45333
337.02	3.56	2.54667	2.13333	3.07667	26.2633	3.93	2.79	3.14	2.37	2.91	3.72333	23.34	3.73667	3.10667	5.25	2.14667	2.6	3.58333	26.5433	2.51667	3.28	2.86	2.52667	2.51667	3.17333	36.9767	7.68333	5.41667	3.09667	2.80333	2.96667	3.13333	43.0433	2.62333	2.60667	4.33	2.46333	2.63	3.90333	39.76	3.46333	3.36333	2.96667	2.82667	2.41667	3.03	25.4933	2.89667	2.43
337.385	3.55	2.54333	2.13	3.05333	26.82	3.94333	2.77667	3.14333	2.36667	2.90667	3.69667	23.53	3.72667	3.1	5.24	2.14667	2.59667	3.57333	26.91	2.51	3.28	2.85	2.50667	2.52	3.18333	37.5667	7.66667	5.41333	3.08667	2.80333	2.96667	3.13667	43.6433	2.62	2.6	4.32667	2.46	2.62	3.9	40.2933	3.45667	3.35	2.96	2.82667	2.40667	3.01667	25.7733	2.88333	2.43
337.749	3.55667	2.55667	2.13333	3.05	27.3467	3.94667	2.78667	3.14	2.38	2.91	3.69667	23.7133	3.71667	3.11	5.22667	2.15	2.60667	3.57667	27.2433	2.52	3.28	2.84333	2.50667	2.52667	3.18333	38.0667	7.65	5.41	3.07667	2.81667	2.97333	3.14333	44.2133	2.61667	2.61	4.33667	2.46	2.61667	3.90667	40.7267	3.46	3.35333	2.95667	2.83	2.41	3.02	26.0167	2.89	2.42333
338.114	3.53667	2.53667	2.12667	3.03	27.8467	3.93667	2.76667	3.12667	2.37	2.89667	3.68333	23.88	3.69667	3.09667	5.21	2.15333	2.59	3.57333	27.5633	2.50667	3.28	2.82333	2.49333	2.5	3.17333	38.58	7.63	5.4	3.06333	2.79667	2.96333	3.13333	44.7733	2.60333	2.59667	4.32333	2.45333	2.61667	3.90667	41.1567	3.46333	3.34333	2.94333	2.82	2.41	3.02	26.2567	2.89	2.42333
338.478	3.53	2.54	2.13333	3.02333	28.2933	3.93	2.75333	3.12333	2.37	2.9	3.69	24.0367	3.7	3.1	5.20667	2.15333	2.58	3.57667	27.8733	2.51	3.28333	2.81667	2.5	2.50333	3.16667	39.0667	7.61333	5.40333	3.06333	2.80667	2.96333	3.13	45.3333	2.60333	2.59333	4.31	2.45333	2.62333	3.91333	41.56	3.47	3.34	2.93667	2.81667	2.39667	3.02	26.4867	2.88	2.42
338.842	3.52333	2.54	2.13	3.02333	28.75	3.93	2.75333	3.12667	2.35	2.90667	3.7	24.1833	3.69667	3.1	5.21	2.14333	2.58333	3.56667	28.1767	2.51333	3.27333	2.80667	2.50333	2.5	3.15	39.57	7.59333	5.4	3.05667	2.81	2.96	3.13333	45.8633	2.59	2.59333	4.30667	2.44333	2.62333	3.91	41.9833	3.46333	3.33667	2.93333	2.81667	2.40333	3.01667	26.7333	2.88333	2.42333
339.206	3.52667	2.54333	2.12333	3.02	29.14	3.92	2.75333	3.12	2.34333	2.90667	3.70667	24.3267	3.70667	3.11	5.21333	2.14667	2.57333	3.57	28.4233	2.51333	3.27	2.8	2.51	2.49333	3.15	39.95	7.59333	5.39	3.05667	2.81	2.95667	3.12	46.31	2.59667	2.58667	4.29333	2.44	2.62333	3.89667	42.2633	3.44667	3.33	2.91667	2.8	2.39667	3	26.89	2.87	2.41
339.571	3.52333	2.53	2.13	3.02667	29.5467	3.92333	2.75333	3.12333	2.35333	2.91667	3.71667	24.47	3.72	3.10333	5.22333	2.16	2.57333	3.57333	28.7	2.51333	3.27	2.80667	2.51333	2.50333	3.16333	40.3733	7.6	5.4	3.05667	2.81667	2.97	3.13333	46.7733	2.6	2.58667	4.28333	2.43	2.61667	3.88	42.59	3.44	3.32	2.9	2.79333	2.38333	2.98333	27.0667	2.85667	2.4
339.935	3.53	2.53	2.13	3.02667	29.91	3.91333	2.76	3.11667	2.35333	2.91333	3.71667	24.5967	3.73	3.09667	5.22	2.15333	2.57667	3.57	28.92	2.51	3.27667	2.81	2.51667	2.52	3.16333	40.7567	7.6	5.39333	3.05333	2.82	2.96	3.13333	47.1867	2.60333	2.59	4.27	2.43	2.60667	3.86667	42.85	3.43333	3.31333	2.89667	2.78333	2.37333	2.96667	27.22	2.85667	2.38667
340.299	3.51	2.51333	2.12	3.02	30.2967	3.91333	2.75667	3.1	2.34333	2.90667	3.71333	24.7167	3.72	3.08667	5.20333	2.14333	2.56667	3.57	29.1867	2.49333	3.26667	2.8	2.50333	2.51333	3.15	41.1467	7.6	5.38667	3.04667	2.82333	2.94333	3.13	47.5667	2.59667	2.58	4.27667	2.42333	2.59667	3.86333	43.1567	3.43	3.31667	2.9	2.77333	2.36667	2.95	27.3767	2.84667	2.37667
340.663	3.5	2.5	2.11667	3	30.62	3.90333	2.73667	3.08333	2.33667	2.9	3.70667	24.8167	3.7	3.07667	5.18	2.13333	2.55667	3.56333	29.3967	2.48	3.25667	2.79333	2.49333	2.50333	3.14333	41.4633	7.58667	5.36667	3.04667	2.80667	2.93667	3.11333	47.8967	2.59	2.57333	4.28	2.43333	2.61	3.88	43.3967	3.43667	3.33667	2.90333	2.78	2.38	2.96333	27.5233	2.85667	2.38667
341.027	3.48	2.49333	2.12	3.01	30.96	3.90667	2.73333	3.06667	2.33667	2.89333	3.7	24.9433	3.69667	3.06667	5.17	2.12667	2.57	3.56667	29.6267	2.47	3.26333	2.79	2.49333	2.50667	3.14333	41.8367	7.57	5.36333	3.04667	2.79667	2.93	3.10667	48.2333	2.59333	2.57667	4.28	2.43	2.59667	3.87667	43.6933	3.44333	3.33333	2.90667	2.76667	2.37667	2.96333	27.6967	2.86	2.38333
341.391	3.48333	2.49	2.11333	3.01333	31.29	3.90333	2.73667	3.07	2.33333	2.89	3.68667	25.0533	3.69667	3.05667	5.15667	2.11667	2.56	3.56667	29.8333	2.46667	3.26667	2.79333	2.5	2.51	3.13333	42.1833	7.55667	5.35	3.05333	2.79333	2.92	3.09667	48.57	2.59333	2.57333	4.28667	2.44667	2.60667	3.89	43.9433	3.44667	3.32333	2.91	2.78333	2.38333	2.97667	27.87	2.87333	2.39333
341.755	3.47667	2.48	2.10667	3.00667	31.5933	3.89333	2.72667	3.06667	2.32	2.88	3.66333	25.1333	3.68667	3.05333	5.15	2.11	2.56	3.55667	30.0233	2.46667	3.25667	2.78	2.48667	2.49667	3.12667	42.46	7.53667	5.34	3.04333	2.78	2.91333	3.08667	48.8267	2.59	2.56333	4.28	2.44	2.60333	3.88333	44.18	3.43333	3.31333	2.89667	2.77333	2.38333	2.97	27.99	2.86667	2.39333
342.119	3.48333	2.48667	2.11667	3.01	31.8767	3.89	2.72	3.07333	2.31667	2.88	3.66333	25.2167	3.69	3.05	5.15	2.11333	2.56667	3.55333	30.19	2.47	3.25667	2.77667	2.47667	2.49	3.13667	42.76	7.53	5.32667	3.03333	2.77667	2.92	3.08333	49.0767	2.59667	2.56333	4.28667	2.44333	2.60667	3.89	44.33	3.43667	3.30667	2.89	2.78	2.38667	2.98667	28.1333	2.87333	2.39667
342.483	3.47667	2.48333	2.12	3.00333	32.1267	3.88667	2.73333	3.08	2.33	2.87667	3.65333	25.2667	3.69667	3.06	5.14	2.11333	2.57	3.54	30.3567	2.48	3.26	2.77667	2.47	2.49333	3.14	43.04	7.52333	5.32333	3.02667	2.77667	2.91333	3.08	49.3033	2.59667	2.56667	4.28	2.43	2.60333	3.88667	44.5467	3.42333	3.28333	2.88667	2.77333	2.37333	2.97333	28.2733	2.86667	2.38333
342.847	3.47	2.47	2.10333	2.99	32.3667	3.87	2.72	3.08	2.32	2.86667	3.64333	25.3133	3.68	3.03	5.12667	2.09667	2.55333	3.52	30.52	2.48	3.23667	2.76333	2.45667	2.48333	3.12333	43.2933	7.5	5.3	3.00333	2.76	2.9	3.06667	49.54	2.59	2.55333	4.28333	2.42667	2.6	3.88	44.6767	3.42333	3.28667	2.87667	2.78333	2.37667	2.96	28.3833	2.86333	2.39
343.21	3.46	2.46	2.08	2.97	32.5967	3.86333	2.70667	3.06	2.30667	2.85667	3.64333	25.37	3.67	3.02	5.10667	2.08667	2.54	3.50667	30.6733	2.48	3.22667	2.75333	2.43	2.47333	3.11333	43.54	7.48333	5.28667	2.97667	2.74667	2.89	3.05	49.72	2.57	2.54333	4.27	2.42333	2.6	3.87	44.83	3.42333	3.29	2.88	2.78	2.37667	2.96	28.48	2.87	2.38333
343.574	3.44667	2.46	2.08333	2.97	32.83	3.86667	2.70667	3.06	2.30333	2.85	3.64	25.4167	3.66333	3.00333	5.09333	2.08667	2.52667	3.51667	30.83	2.47667	3.22333	2.76	2.43333	2.47333	3.11667	43.8167	7.48333	5.28333	2.99	2.74667	2.88667	3.04667	49.9233	2.58	2.55333	4.27667	2.42	2.59333	3.87667	44.9733	3.42667	3.3	2.88667	2.79667	2.37333	2.96	28.5767	2.86333	2.38667
343.938	3.44667	2.46333	2.08	2.97333	33.06	3.86667	2.71667	3.06333	2.30667	2.84667	3.64667	25.5033	3.66333	3.00667	5.08333	2.09333	2.52333	3.51	31.04	2.48	3.22667	2.76	2.44333	2.47	3.12	44.1033	7.47667	5.28667	2.99667	2.74667	2.88333	3.05	50.1633	2.57667	2.55667	4.26	2.42	2.59333	3.86	45.1867	3.42333	3.29333	2.88667	2.79	2.37	2.96333	28.6833	2.86667	2.39
344.302	3.44	2.46333	2.07	2.97	33.3033	3.86667	2.70333	3.06333	2.29667	2.83667	3.64667	25.57	3.66333	3.00667	5.07	2.09	2.51333	3.51333	31.1967	2.46667	3.22333	2.75	2.43333	2.45667	3.11	44.3467	7.46333	5.28	2.98667	2.74667	2.88333	3.04333	50.3633	2.57333	2.54667	4.25667	2.42	2.58667	3.85333	45.3567	3.41333	3.29667	2.87	2.79	2.36667	2.96333	28.8067	2.85667	2.39
344.665	3.44333	2.46667	2.08	2.95667	33.53	3.87	2.70667	3.06667	2.29667	2.84	3.65	25.65	3.66333	3.01333	5.07333	2.09333	2.52	3.52667	31.3467	2.46667	3.22667	2.75333	2.42667	2.46333	3.11667	44.6033	7.46333	5.29	2.98667	2.74667	2.88	3.05	50.5667	2.57333	2.53667	4.25333	2.42	2.59	3.84667	45.54	3.40333	3.29333	2.87333	2.78667	2.36	2.96333	28.8967	2.86	2.38
345.029	3.44667	2.48	2.09667	2.96667	33.7533	3.87	2.71	3.07667	2.3	2.84333	3.65	25.7067	3.67	3.03	5.09667	2.09667	2.53	3.53333	31.5367	2.46333	3.24	2.75667	2.43333	2.46667	3.12333	44.87	7.45333	5.29	2.99	2.75	2.88333	3.06667	50.7667	2.59	2.55	4.25667	2.40667	2.58	3.83667	45.6967	3.39333	3.28333	2.85333	2.77667	2.35333	2.95333	28.9933	2.83	2.37333
345.393	3.44333	2.48	2.09333	2.97	33.99	3.86667	2.71667	3.08333	2.32	2.83667	3.66	25.7867	3.67	3.04	5.1	2.10333	2.53333	3.52333	31.72	2.46	3.25	2.75667	2.43667	2.48	3.11	45.1067	7.44333	5.28333	2.98333	2.75	2.89667	3.07333	50.9767	2.58	2.54	4.24	2.41333	2.58333	3.82333	45.8933	3.39333	3.27	2.85667	2.77	2.34333	2.95333	29.1067	2.82333	2.37
345.756	3.42333	2.46333	2.07333	2.94333	34.1667	3.84333	2.69667	3.07333	2.29667	2.82333	3.64333	25.79	3.65667	3.02	5.1	2.08333	2.51333	3.51333	31.7767	2.44667	3.23	2.74	2.40667	2.47	3.09	45.2633	7.41	5.26667	2.96	2.73333	2.87333	3.05667	51.0867	2.57	2.52	4.22667	2.4	2.58	3.82333	45.9967	3.38333	3.27	2.84333	2.75667	2.34	2.94	29.17	2.81	2.36333
346.12	3.42	2.45667	2.07	2.94667	34.3633	3.84333	2.7	3.06333	2.28667	2.82667	3.64667	25.87	3.65333	3.01	5.10333	2.08	2.5	3.50333	31.8967	2.45	3.22	2.74333	2.41667	2.47	3.09667	45.5133	7.41667	5.27333	2.94667	2.73	2.86667	3.05667	51.28	2.56333	2.51333	4.23333	2.4	2.58333	3.82333	46.13	3.37667	3.26333	2.85333	2.75333	2.33667	2.94333	29.26	2.81	2.36333
346.483	3.41	2.45667	2.06667	2.95333	34.5733	3.84	2.7	3.06	2.28667	2.81333	3.65333	25.9	3.65333	3.01667	5.08667	2.08333	2.50333	3.49667	32.0333	2.44333	3.22333	2.73667	2.41667	2.47333	3.09667	45.73	7.42	5.26333	2.94333	2.72667	2.87	3.05667	51.4667	2.57667	2.52667	4.23	2.4	2.59	3.83	46.23	3.38667	3.26333	2.86	2.77333	2.34	2.94667	29.3633	2.81667	2.37333
346.846	3.4	2.43667	2.05333	2.94333	34.7467	3.81667	2.69667	3.04	2.27333	2.81333	3.64	25.9367	3.63	3.00667	5.07333	2.08	2.49333	3.48667	32.0933	2.43333	3.20667	2.72667	2.41	2.46	3.07667	45.92	7.41	5.25333	2.93667	2.72	2.86333	3.05	51.64	2.57	2.51333	4.22	2.40667	2.58333	3.82667	46.3267	3.38667	3.27	2.87	2.76	2.34333	2.94333	29.4367	2.83667	2.37
347.21	3.39333	2.41333	2.06	2.92667	34.8967	3.81	2.68333	3.02333	2.25333	2.81	3.62333	25.9667	3.61	3	5.06	2.06667	2.48667	3.48667	32.1533	2.42667	3.19667	2.71	2.40667	2.43333	3.07	46.0933	7.4	5.23667	2.91667	2.70667	2.84333	3.03333	51.7833	2.56333	2.51	4.24	2.41333	2.59333	3.84	46.39	3.39333	3.28333	2.87667	2.76667	2.35667	2.95	29.5167	2.85	2.36667
347.573	3.38667	2.41333	2.07333	2.93	35.08	3.81	2.69333	3.02667	2.26333	2.82	3.63	26.0367	3.61	3.01333	5.04667	2.06667	2.49333	3.49	32.28	2.44	3.20667	2.71667	2.40333	2.43333	3.07333	46.3333	7.39667	5.22333	2.92	2.71	2.85	3.03667	51.9567	2.56667	2.52667	4.25333	2.42333	2.59333	3.84333	46.49	3.39333	3.28	2.88	2.77667	2.35667	2.95333	29.6	2.85667	2.36667
347.937	3.39	2.42333	2.07	2.93333	35.2533	3.81667	2.70333	3.03	2.26667	2.83333	3.62667	26.0767	3.61	3.01333	5.03333	2.08333	2.49667	3.50333	32.41	2.44333	3.21667	2.70667	2.4	2.43667	3.06333	46.5133	7.37667	5.21667	2.94	2.71667	2.86	3.04	52.08	2.56333	2.52333	4.24667	2.42667	2.6	3.83333	46.5767	3.4	3.28	2.87667	2.78	2.36333	2.95	29.6567	2.86	2.37
348.3	3.39333	2.41333	2.07	2.92333	35.3967	3.81667	2.70333	3.02667	2.26667	2.83667	3.60667	26.1	3.61333	3.00333	5.02333	2.07667	2.49333	3.5	32.4767	2.44	3.21667	2.70333	2.38667	2.44	3.05333	46.6767	7.36667	5.20667	2.93667	2.72	2.86667	3.03333	52.1833	2.55	2.51667	4.24667	2.42333	2.59667	3.82	46.7	3.39333	3.27333	2.86333	2.76333	2.36333	2.94333	29.7367	2.84667	2.35667
348.663	3.39333	2.42333	2.05333	2.92333	35.5833	3.82667	2.69667	3.01667	2.27	2.83667	3.61	26.1333	3.61667	2.99667	5.01667	2.07333	2.48333	3.49	32.5667	2.44333	3.21	2.71	2.38333	2.44	3.07333	46.83	7.34667	5.19667	2.94333	2.71	2.86667	3.02	52.2367	2.54667	2.51	4.23667	2.41333	2.58333	3.81333	46.7967	3.39	3.26333	2.84667	2.76	2.34667	2.93	29.81	2.83	2.35333
349.026	3.39333	2.42667	2.04333	2.91	35.7133	3.82333	2.69333	3.01	2.26667	2.83	3.61333	26.1433	3.62333	2.99667	5.00333	2.07667	2.48667	3.48333	32.6667	2.43667	3.20333	2.70667	2.37	2.44	3.07667	47	7.34	5.2	2.93333	2.71	2.87	3.00667	52.3067	2.53333	2.50333	4.22333	2.40333	2.57667	3.80667	46.9333	3.37667	3.25667	2.84667	2.75	2.33667	2.92333	29.9033	2.82	2.36
349.389	3.40333	2.42333	2.03333	2.91	35.89	3.82667	2.68667	3.01	2.27	2.82667	3.61	26.1633	3.63667	3.00333	5.00667	2.08	2.49	3.48	32.7567	2.43	3.20333	2.70667	2.37333	2.44	3.07333	47.1433	7.35	5.20333	2.93	2.70667	2.86	3.01	52.4233	2.54	2.5	4.24	2.41333	2.58	3.81333	47.0667	3.39333	3.25667	2.84667	2.75667	2.34333	2.93	30.0233	2.83333	2.36333
349.752	3.4	2.41667	2.04667	2.9	36.0267	3.82333	2.67333	3.00333	2.27333	2.81667	3.61	26.2	3.63667	2.99667	5.00333	2.07	2.48667	3.47667	32.81	2.42667	3.19333	2.71333	2.36667	2.44333	3.07333	47.2667	7.33667	5.19	2.91333	2.7	2.85333	3.00333	52.5233	2.54333	2.50667	4.23	2.39667	2.58	3.80333	47.1433	3.37667	3.25	2.84	2.74333	2.34	2.91	30.12	2.82	2.35
350.116	3.40667	2.41667	2.04667	2.90667	36.1733	3.81667	2.67	2.99667	2.28333	2.82	3.60667	26.2533	3.63	2.99667	5	2.05667	2.49	3.46	32.9067	2.43	3.18333	2.71667	2.37667	2.43667	3.07333	47.42	7.31333	5.18667	2.91	2.68667	2.85	3.00333	52.6133	2.54667	2.5	4.23333	2.39667	2.57	3.8	47.2567	3.36667	3.24333	2.84667	2.74	2.32333	2.89667	30.1767	2.82333	2.34667
350.479	3.40333	2.42333	2.07333	2.91667	36.3233	3.82	2.67667	3.01333	2.29333	2.83	3.61667	26.3267	3.65	3.00667	5.00333	2.07333	2.50333	3.46667	33.0133	2.44	3.19	2.71667	2.39667	2.43667	3.07667	47.5833	7.32333	5.19667	2.90667	2.71	2.84333	3.01333	52.76	2.55	2.51333	4.23667	2.39667	2.59	3.79333	47.4133	3.36333	3.24	2.85333	2.74	2.33333	2.9	30.3	2.82333	2.35667
350.842	3.40333	2.43	2.06667	2.92667	36.5	3.83667	2.68	3.02	2.28667	2.83333	3.61667	26.4133	3.65667	3.00333	5.01	2.07	2.51	3.47	33.1033	2.45333	3.19333	2.71667	2.40333	2.44667	3.08333	47.78	7.33	5.20667	2.92	2.70667	2.84333	3.04	52.9	2.56	2.51667	4.23333	2.40333	2.58333	3.79	47.5033	3.36667	3.23	2.84	2.74667	2.32667	2.9	30.4133	2.82667	2.35333
351.205	3.4	2.44333	2.08	2.94	36.7033	3.84333	2.69333	3.02333	2.29667	2.84	3.62667	26.5	3.65333	3.00667	5.02667	2.07667	2.50667	3.48667	33.2267	2.47333	3.2	2.72	2.41	2.46	3.09	47.9667	7.33333	5.21667	2.92667	2.7	2.86	3.04667	53.0233	2.57333	2.51333	4.21667	2.39	2.58667	3.76333	47.5667	3.34667	3.23	2.82333	2.72667	2.32	2.89	30.4567	2.81	2.34333
351.568	3.40667	2.45	2.08333	2.95333	36.8967	3.85	2.71333	3.02333	2.3	2.85	3.63333	26.5633	3.67	3.02	5.04667	2.08	2.51333	3.49667	33.3567	2.47333	3.21333	2.72333	2.41667	2.46667	3.10333	48.1867	7.33667	5.22667	2.94667	2.71333	2.86667	3.05667	53.1433	2.58333	2.52333	4.22667	2.39333	2.58	3.78	47.7167	3.36333	3.22333	2.83	2.72667	2.32333	2.89	30.5633	2.82	2.35667
351.93	3.40667	2.45667	2.08	2.95333	37.09	3.86333	2.71667	3.03667	2.30667	2.85667	3.64	26.6433	3.67333	3.02333	5.05333	2.09667	2.50667	3.51667	33.4833	2.47333	3.22667	2.72333	2.42	2.46667	3.09667	48.3767	7.34667	5.23	2.96	2.72667	2.86667	3.05667	53.28	2.58667	2.53	4.23	2.39333	2.6	3.79	47.8367	3.38	3.23333	2.83	2.73	2.33333	2.92	30.7033	2.82667	2.37333
352.293	3.41	2.45333	2.07333	2.94667	37.2533	3.86	2.71333	3.03667	2.30333	2.85	3.64333	26.6933	3.66	3.03	5.04667	2.09333	2.5	3.51667	33.5633	2.48667	3.22333	2.72667	2.41333	2.47	3.09667	48.53	7.34667	5.22	2.96667	2.72	2.87667	3.05	53.4433	2.58667	2.53333	4.25	2.41	2.60667	3.80333	47.95	3.39333	3.24667	2.83667	2.74	2.34333	2.93333	30.82	2.84667	2.38333
352.656	3.42333	2.45333	2.09	2.95	37.4033	3.86	2.72	3.04	2.31667	2.86667	3.64333	26.74	3.64667	3.02667	5.05333	2.09667	2.50333	3.51667	33.6667	2.48667	3.22667	2.72667	2.40667	2.47667	3.09667	48.6267	7.33333	5.21	2.97333	2.73667	2.88333	3.04333	53.5867	2.58	2.53333	4.24667	2.39667	2.59667	3.80333	48.0767	3.38667	3.24	2.83667	2.72667	2.34333	2.91	30.9167	2.82667	2.37
353.019	3.42667	2.44333	2.07	2.93667	37.49	3.86	2.70333	3.03333	2.31	2.86	3.63333	26.7533	3.63333	3.01	5.04667	2.08333	2.5	3.51	33.7067	2.46333	3.23	2.71333	2.4	2.45333	3.09333	48.7333	7.30667	5.19333	2.97	2.73333	2.87333	3.02	53.6767	2.57	2.52	4.24667	2.4	2.59333	3.81667	48.21	3.39333	3.24667	2.85667	2.74333	2.33667	2.91667	31.0433	2.83667	2.37
353.382	3.41333	2.42	2.05333	2.91667	37.63	3.84333	2.68	3.02667	2.29667	2.84667	3.62	26.8067	3.61667	2.99333	5.03	2.07	2.48667	3.49333	33.7733	2.45667	3.21667	2.7	2.38333	2.43	3.07333	48.8433	7.28667	5.17	2.95	2.71667	2.85667	3.01333	53.79	2.55	2.51	4.24	2.38667	2.58667	3.80333	48.3267	3.4	3.24667	2.85	2.74	2.32333	2.92	31.1533	2.83	2.35333
353.744	3.39667	2.41	2.04333	2.90333	37.7733	3.82667	2.66	3.01667	2.27667	2.83	3.59	26.88	3.60333	2.98	5.01333	2.06333	2.48	3.48	33.81	2.45	3.2	2.68667	2.36667	2.42	3.06333	48.9267	7.28	5.15	2.92667	2.71	2.84667	3.00333	53.9167	2.54	2.49667	4.23333	2.38	2.57	3.8	48.3967	3.38667	3.24	2.84667	2.75	2.31	2.90333	31.2133	2.82	2.34333
354.107	3.38	2.39	2.02667	2.88333	37.9067	3.80333	2.64333	2.99667	2.25333	2.8	3.56667	26.9167	3.57667	2.96667	5	2.04667	2.47333	3.46333	33.88	2.42333	3.18333	2.65	2.34	2.39333	3.04	49.0267	7.27	5.12333	2.90667	2.68667	2.82333	2.99333	53.9633	2.52667	2.46333	4.21333	2.37667	2.55	3.78667	48.5	3.36667	3.21667	2.83333	2.73333	2.29333	2.88	31.3	2.79667	2.33
354.47	3.37333	2.38	2.01333	2.87	38.0567	3.79667	2.63333	2.99	2.24667	2.77333	3.56667	26.9933	3.58	2.97	4.98667	2.04333	2.46	3.46	33.93	2.41667	3.17667	2.63	2.33667	2.38333	3.03333	49.1633	7.25667	5.11333	2.89333	2.68333	2.81667	2.99333	54.0467	2.53333	2.46333	4.21333	2.38667	2.55333	3.78333	48.62	3.38333	3.21333	2.84	2.74333	2.28667	2.90667	31.3933	2.8	2.34
354.832	3.35667	2.37333	2.01	2.86	38.1733	3.78667	2.61667	2.98667	2.22667	2.76333	3.54667	27.0667	3.57333	2.96333	4.96	2.04	2.45667	3.45	33.9467	2.41333	3.15	2.61667	2.32667	2.38333	3.01667	49.2633	7.24667	5.1	2.86667	2.68	2.8	2.98333	54.1467	2.51333	2.46333	4.22	2.38333	2.55	3.78	48.7833	3.38	3.20667	2.83333	2.73333	2.28667	2.91	31.49	2.79333	2.35667
355.195	3.36	2.37667	2.01	2.88	38.3367	3.79	2.62333	2.98333	2.23	2.76333	3.55333	27.1367	3.57667	2.97333	4.95333	2.04333	2.46	3.45333	33.9933	2.42333	3.14667	2.62667	2.34333	2.38333	3.01	49.3667	7.26	5.11	2.88	2.69	2.81333	2.98667	54.31	2.51	2.47	4.21333	2.38	2.54	3.77667	48.8767	3.36667	3.2	2.82333	2.72	2.28667	2.90333	31.55	2.78	2.35333
355.557	3.38	2.39	2.03	2.89	38.47	3.81	2.64667	2.99333	2.25	2.78	3.57333	27.18	3.59333	3	4.97667	2.05	2.46667	3.47333	34.05	2.43667	3.18	2.64	2.35667	2.39	3.02333	49.4767	7.27667	5.12667	2.88	2.70333	2.83	3	54.4267	2.51667	2.47667	4.21333	2.38	2.55	3.78	49.04	3.37667	3.21333	2.81333	2.72333	2.28667	2.90333	31.6567	2.78	2.35333
355.92	3.38333	2.39667	2.04333	2.90667	38.6033	3.83	2.66	3.01	2.26667	2.80667	3.59	27.2367	3.61667	3.01	4.98	2.06	2.47667	3.49	34.1033	2.44667	3.19333	2.67	2.37	2.39667	3.03667	49.5833	7.27333	5.14	2.90333	2.71333	2.85	3.01	54.5267	2.52667	2.51333	4.20667	2.37	2.54	3.78	49.11	3.36667	3.21667	2.8	2.72667	2.29333	2.90667	31.7067	2.78	2.36
356.282	3.37333	2.39	2.02667	2.9	38.7567	3.82333	2.65	2.99333	2.26333	2.81667	3.59	27.2633	3.61	3.01	4.97333	2.04333	2.47	3.48	34.1233	2.44333	3.17667	2.66667	2.36333	2.38	3.03	49.66	7.27	5.12	2.89	2.69667	2.83667	3.00333	54.66	2.51	2.51	4.20667	2.36667	2.54667	3.77667	49.2033	3.35667	3.22333	2.79667	2.73	2.29667	2.9	31.7367	2.79	2.35667
356.644	3.37667	2.39667	2.02667	2.9	38.9033	3.82	2.66333	3.00333	2.27333	2.82	3.59667	27.2933	3.61333	2.99667	4.98	2.03333	2.47333	3.49	34.1867	2.44667	3.20333	2.67333	2.36667	2.38	3.04667	49.74	7.28	5.12	2.9	2.69667	2.85333	3.02333	54.78	2.52333	2.51	4.20333	2.36667	2.54667	3.78333	49.2233	3.35333	3.21667	2.78667	2.72333	2.28667	2.88333	31.7833	2.77333	2.34
357.007	3.37	2.38333	2.02667	2.89	38.9933	3.82333	2.65333	2.99333	2.27667	2.82	3.59667	27.29	3.61333	2.98	4.96333	2.03	2.46667	3.49333	34.16	2.43333	3.2	2.66333	2.33667	2.37	3.03333	49.7433	7.28667	5.1	2.9	2.67333	2.84333	3.02	54.77	2.52333	2.50333	4.22	2.38	2.57667	3.79667	49.3367	3.37333	3.24	2.8	2.73667	2.30333	2.9	31.8733	2.78667	2.35333
357.369	3.36	2.37333	2.01333	2.87667	39.09	3.80667	2.64	2.98333	2.26667	2.81	3.59333	27.3067	3.60333	2.96333	4.94	2.01667	2.46333	3.47	34.1633	2.43	3.18333	2.65	2.33	2.36333	3.02	49.81	7.26667	5.09	2.90333	2.66333	2.83333	3.00667	54.8233	2.52333	2.5	4.23	2.38333	2.59	3.79333	49.3767	3.36667	3.23	2.81667	2.73667	2.31333	2.9	31.9133	2.78	2.35667
357.731	3.35333	2.37	2.01667	2.87333	39.1833	3.81667	2.64333	2.98333	2.26667	2.80667	3.58667	27.3167	3.60333	2.96667	4.94333	2.02333	2.46333	3.47	34.1833	2.43333	3.19333	2.64667	2.33333	2.36667	3.02333	49.8333	7.27	5.1	2.89667	2.67333	2.83	3.01	54.89	2.53	2.48667	4.24667	2.39	2.60667	3.81	49.4467	3.38	3.23667	2.83	2.73667	2.32	2.90333	31.9733	2.78333	2.37
358.094	3.36667	2.37667	2.03667	2.88333	39.2667	3.82	2.65	3.00333	2.28	2.81	3.59333	27.34	3.61667	2.97333	4.95	2.04333	2.48333	3.48333	34.2333	2.43667	3.2	2.66667	2.34667	2.39	3.03667	49.8733	7.26667	5.11333	2.91	2.68667	2.84333	3.02333	54.9	2.53667	2.50333	4.25333	2.39667	2.60667	3.81667	49.4533	3.39667	3.23	2.82667	2.73667	2.32333	2.90333	32.0267	2.78667	2.37333
358.456	3.36333	2.37333	2.04667	2.87667	39.34	3.82	2.64	2.98667	2.27667	2.80333	3.58333	27.38	3.61333	2.98	4.95667	2.05	2.48	3.48	34.2567	2.45	3.19333	2.67	2.34333	2.39333	3.03	49.9067	7.25667	5.11333	2.89333	2.68333	2.84	3.01333	54.9167	2.53667	2.5	4.25333	2.40667	2.60333	3.82	49.5367	3.39667	3.22667	2.83667	2.74	2.32333	2.91667	32.08	2.79333	2.38
358.818	3.36667	2.38	2.05	2.87333	39.41	3.81	2.65333	2.98333	2.27333	2.8	3.58333	27.4467	3.60333	2.99333	4.97	2.04667	2.49	3.47	34.3433	2.45	3.19333	2.66	2.36	2.39667	3.04667	49.9967	7.24667	5.13	2.87667	2.69667	2.83333	3.01667	55.0367	2.54333	2.49	4.24	2.39667	2.57667	3.8	49.5933	3.39333	3.21	2.83	2.73333	2.31	2.89667	32.11	2.79	2.37667
359.18	3.36333	2.38667	2.05333	2.87	39.5167	3.80333	2.65333	2.97667	2.27	2.80333	3.58333	27.47	3.59333	2.98667	4.96667	2.04	2.49	3.46667	34.38	2.44667	3.18	2.65333	2.36333	2.4	3.04	50.0433	7.25333	5.12667	2.86667	2.69333	2.83333	3.01333	55.08	2.53	2.49	4.24	2.39667	2.56667	3.81	49.6567	3.39	3.21333	2.81	2.72667	2.31	2.89333	32.1733	2.8	2.36667
359.542	3.36	2.39	2.04333	2.87	39.6067	3.78667	2.64333	2.96667	2.25667	2.78667	3.56667	27.5233	3.57333	2.97	4.95667	2.02667	2.48333	3.45667	34.41	2.43667	3.16333	2.64333	2.35	2.39	3.02667	50.11	7.25667	5.11	2.86	2.68333	2.82667	2.99667	55.14	2.52	2.46667	4.24	2.38667	2.56333	3.8	49.7533	3.38	3.20667	2.80667	2.72	2.30667	2.88667	32.2367	2.81	2.35
359.904	3.34667	2.39667	2.03333	2.86	39.7133	3.78	2.64667	2.95	2.24333	2.78333	3.56667	27.59	3.56667	2.95667	4.95333	2.03	2.47333	3.44667	34.46	2.42333	3.15667	2.63667	2.33	2.37	3.01333	50.1567	7.26	5.11	2.85	2.67333	2.80667	2.99	55.2033	2.52667	2.46333	4.21667	2.38	2.54667	3.79333	49.8433	3.36667	3.20333	2.81	2.72	2.30333	2.87667	32.3	2.80333	2.33333
360.266	3.34333	2.38	2.01667	2.86	39.8133	3.78	2.64333	2.95667	2.24	2.78333	3.58	27.6333	3.56667	2.94667	4.94667	2.03333	2.47333	3.44333	34.4967	2.41	3.15333	2.63	2.32667	2.36333	3.01	50.2167	7.24667	5.11	2.87	2.66667	2.80667	2.99	55.2733	2.51667	2.46	4.23	2.37333	2.54667	3.77667	49.9	3.37	3.21667	2.8	2.72333	2.30667	2.86667	32.3633	2.80667	2.33
360.628	3.33	2.38	2.01	2.85667	39.9467	3.79	2.64	2.95333	2.24667	2.77667	3.56	27.68	3.56667	2.94	4.93333	2.03	2.46333	3.43667	34.5433	2.40333	3.14667	2.62	2.31	2.35	3.01	50.31	7.23667	5.11333	2.88333	2.65667	2.80333	2.98333	55.3767	2.5	2.47333	4.21333	2.36333	2.54333	3.76667	49.9367	3.35333	3.2	2.78	2.71667	2.28333	2.86333	32.4033	2.78667	2.30667
360.99	3.33333	2.37333	2.01333	2.87333	40.0433	3.79333	2.65667	2.97	2.25667	2.77667	3.55	27.7567	3.57667	2.94333	4.94667	2.04	2.46	3.44667	34.5833	2.41667	3.15667	2.61667	2.31	2.35333	3.01667	50.3633	7.24667	5.12	2.89667	2.66	2.81	2.99667	55.4467	2.50667	2.47333	4.2	2.35	2.53333	3.74667	49.9767	3.34667	3.18333	2.78	2.70333	2.27333	2.86	32.4667	2.78667	2.30333
361.352	3.33333	2.37	2.01	2.86333	40.13	3.79	2.66333	2.96667	2.26333	2.76667	3.56	27.8067	3.59	2.95333	4.93333	2.04	2.46667	3.45333	34.5767	2.41333	3.15333	2.60667	2.30667	2.35333	3.02	50.4033	7.22667	5.11667	2.89	2.65333	2.80667	2.98667	55.53	2.5	2.48333	4.20333	2.34667	2.53667	3.74667	49.9933	3.35	3.18667	2.78	2.72	2.27	2.86333	32.4833	2.78	2.30667
361.714	3.33333	2.37	2.00667	2.86667	40.2267	3.79333	2.65667	2.97667	2.27333	2.77	3.56	27.8633	3.59667	2.96333	4.94	2.03333	2.46667	3.45667	34.6233	2.41333	3.15333	2.59333	2.3	2.35667	3.02333	50.4833	7.23667	5.11333	2.89667	2.66667	2.82	2.98	55.6667	2.5	2.48	4.22333	2.35667	2.55333	3.75667	50.0533	3.37	3.20333	2.78667	2.73	2.27667	2.88	32.55	2.79333	2.32667
362.076	3.33667	2.37667	2.01	2.86333	40.3333	3.78667	2.65667	2.98333	2.28667	2.78	3.56	27.9267	3.6	2.98	4.93667	2.03333	2.47	3.45667	34.63	2.42	3.15	2.59	2.31333	2.35667	3.03	50.5	7.25	5.11333	2.9	2.67	2.81333	2.97	55.7333	2.50333	2.48333	4.21333	2.34667	2.54667	3.75333	50.0933	3.35333	3.18667	2.78	2.72	2.27	2.88	32.57	2.78667	2.33
362.437	3.34	2.38667	2.02667	2.87	40.42	3.78333	2.66	2.99333	2.29333	2.79333	3.58667	27.9467	3.60667	2.99333	4.94333	2.04	2.48	3.47333	34.6133	2.43	3.15333	2.60333	2.32	2.36	3.04667	50.4533	7.25	5.11667	2.90667	2.68	2.81667	2.98	55.7433	2.51667	2.49	4.23333	2.35667	2.55667	3.77667	50.14	3.37333	3.20333	2.79	2.72667	2.29333	2.89	32.6167	2.8	2.35
362.799	3.34667	2.39	2.01333	2.86	40.5133	3.79	2.64	2.98333	2.28	2.79667	3.60333	27.96	3.60333	2.98667	4.91667	2.05	2.48	3.46667	34.6667	2.44	3.14667	2.61333	2.32667	2.35667	3.03667	50.44	7.22667	5.1	2.89	2.68	2.81	2.97667	55.7933	2.53	2.48333	4.23333	2.36	2.55333	3.77667	50.23	3.37667	3.20333	2.79333	2.72667	2.29333	2.89	32.6233	2.79	2.34
363.161	3.34333	2.39667	2.02333	2.87	40.5967	3.78667	2.63333	2.98333	2.27667	2.80333	3.60333	27.98	3.60333	2.98333	4.91667	2.05333	2.47	3.46	34.6867	2.44333	3.15	2.61667	2.33	2.36333	3.03667	50.42	7.23333	5.11333	2.87667	2.69333	2.81333	2.97667	55.8233	2.53333	2.48	4.23	2.36667	2.56667	3.78	50.3067	3.38667	3.21667	2.80667	2.73667	2.3	2.89667	32.68	2.81	2.35667
363.522	3.34333	2.38333	2.01667	2.87333	40.67	3.78333	2.62667	2.96667	2.27333	2.79	3.60667	28.02	3.58667	2.96667	4.90667	2.05333	2.45333	3.46	34.6567	2.45	3.15667	2.62667	2.33	2.36667	3.02667	50.3833	7.21333	5.11333	2.88	2.68333	2.80667	2.98333	55.81	2.53	2.48333	4.21667	2.36667	2.56	3.77667	50.4067	3.36667	3.19333	2.79333	2.72667	2.29667	2.88667	32.71	2.78667	2.34667
363.884	3.36333	2.37667	2.02	2.87667	40.7167	3.79667	2.63	2.95667	2.27	2.78333	3.61	28.04	3.59333	2.97333	4.91	2.07	2.45	3.46667	34.69	2.46	3.18	2.63667	2.32333	2.37333	3.03333	50.35	7.22667	5.12	2.87667	2.69	2.82	2.99333	55.8333	2.54333	2.48667	4.20333	2.37	2.56	3.78	50.4933	3.35667	3.20333	2.8	2.73	2.29	2.88333	32.76	2.79	2.34333
364.246	3.36667	2.38	2.02	2.88	40.7667	3.80333	2.62667	2.96	2.27	2.78	3.61	28.0867	3.59667	2.96667	4.90667	2.07667	2.45667	3.46333	34.69	2.46333	3.18	2.63	2.33	2.37667	3.02	50.36	7.24	5.11333	2.88333	2.69333	2.82	2.99	55.8767	2.53667	2.48667	4.21	2.38	2.57667	3.77667	50.56	3.33333	3.22333	2.82	2.73333	2.3	2.88333	32.7933	2.80333	2.35667
364.607	3.34667	2.35667	2.01	2.86333	40.8233	3.79	2.61667	2.94667	2.26333	2.76667	3.59333	28.1467	3.58	2.95	4.9	2.05667	2.45	3.45667	34.65	2.44	3.17667	2.63333	2.31667	2.37	3.00333	50.3267	7.24	5.09333	2.87333	2.67667	2.81	2.97333	55.91	2.51667	2.47333	4.22333	2.39333	2.59667	3.79667	50.58	3.34333	3.24	2.83667	2.75333	2.32333	2.90667	32.8267	2.81333	2.37667
364.969	3.35667	2.34333	2.01333	2.86333	40.9233	3.8	2.62	2.94667	2.27	2.77	3.59333	28.1967	3.58667	2.95	4.91333	2.06	2.45333	3.47	34.66	2.45	3.19	2.63	2.31667	2.36	3.01333	50.3567	7.23	5.09	2.87667	2.67	2.81333	2.97333	55.96	2.51667	2.47333	4.21	2.38	2.58	3.78667	50.6733	3.32	3.23	2.81667	2.73333	2.30667	2.89667	32.8667	2.79333	2.36
365.33	3.36	2.35667	2.02	2.85333	40.97	3.80333	2.62333	2.95333	2.27667	2.78333	3.59667	28.22	3.60333	2.96667	4.91667	2.07667	2.47	3.46667	34.6867	2.45	3.19667	2.63667	2.32667	2.35667	3.02	50.3433	7.23333	5.08333	2.87333	2.67333	2.83	2.97333	56.0033	2.52	2.47667	4.21667	2.38333	2.57667	3.78	50.6567	3.32333	3.23333	2.82333	2.72333	2.31	2.89333	32.8533	2.79333	2.37
365.692	3.34667	2.36	2.03	2.86333	41.0933	3.80667	2.61333	2.96	2.27667	2.79	3.59667	28.2867	3.6	2.96333	4.91333	2.07333	2.47	3.46	34.7233	2.44667	3.18333	2.62667	2.32667	2.35667	3.00667	50.4	7.22333	5.07	2.87333	2.67333	2.82667	2.96667	56.1233	2.51667	2.48333	4.23	2.38667	2.59667	3.79667	50.7133	3.32667	3.23333	2.82667	2.73333	2.31333	2.9	32.9167	2.79333	2.37333
366.053	3.34333	2.35333	2.02333	2.85333	41.1533	3.79667	2.61333	2.94	2.27	2.79	3.58	28.34	3.59333	2.95667	4.89667	2.04333	2.46	3.45333	34.75	2.43	3.18333	2.61	2.30667	2.34333	3.00667	50.4133	7.22667	5.06667	2.84667	2.66	2.83333	2.96667	56.1933	2.5	2.48	4.22667	2.38333	2.58667	3.78	50.77	3.33	3.21333	2.81667	2.72333	2.30333	2.88667	32.96	2.78667	2.36333
366.414	3.34333	2.36	2.02	2.86	41.2467	3.80667	2.61667	2.94667	2.26667	2.79667	3.58	28.3733	3.58667	2.96333	4.9	2.04667	2.46333	3.44667	34.79	2.43	3.18	2.60333	2.3	2.33667	3.01667	50.4433	7.21667	5.07667	2.84333	2.65333	2.83333	2.97	56.24	2.50333	2.48333	4.22	2.38	2.57667	3.77333	50.8533	3.33333	3.20333	2.8	2.70333	2.29333	2.87667	32.99	2.78667	2.35333
366.776	3.33333	2.37	2.02	2.85333	41.3133	3.78	2.60667	2.93333	2.26667	2.80333	3.58333	28.4367	3.59333	2.95667	4.89333	2.03667	2.45333	3.44333	34.8533	2.42333	3.16	2.59333	2.28333	2.33667	3.00333	50.43	7.22	5.07333	2.84	2.65	2.82	2.96667	56.3367	2.5	2.47333	4.21667	2.38667	2.57667	3.77667	50.8667	3.33333	3.19	2.80667	2.70333	2.31	2.87667	33.02	2.79333	2.36333
367.137	3.33333	2.37	2.02667	2.87	41.4133	3.77	2.61	2.94333	2.25333	2.81	3.58667	28.5167	3.60333	2.96	4.89667	2.03667	2.45	3.45333	34.9033	2.42333	3.17	2.59333	2.28333	2.33667	2.99667	50.5133	7.24333	5.08333	2.83667	2.65333	2.83	2.97667	56.4533	2.50333	2.47333	4.21333	2.38	2.57	3.77667	50.99	3.33333	3.19	2.8	2.70667	2.29667	2.88667	33.0733	2.80333	2.36333
367.498	3.32	2.35667	2.00667	2.86667	41.4467	3.75	2.6	2.93667	2.23667	2.8	3.58667	28.52	3.59333	2.96	4.88667	2.02333	2.44	3.45667	34.9	2.41	3.17	2.58	2.27333	2.32333	2.99667	50.5167	7.23667	5.08333	2.83333	2.63	2.81667	2.97333	56.45	2.49667	2.46	4.2	2.38667	2.55667	3.77	51.0467	3.32667	3.18667	2.79667	2.70333	2.30333	2.88667	33.12	2.8	2.35333
367.859	3.31	2.35333	2.00667	2.85667	41.53	3.74333	2.58333	2.92333	2.22667	2.78667	3.58	28.56	3.59667	2.97	4.88	2.02667	2.43667	3.45333	34.91	2.4	3.17	2.58333	2.27667	2.31333	2.98	50.5167	7.23333	5.08333	2.83333	2.63	2.81667	2.97333	56.49	2.49333	2.44667	4.21333	2.39	2.56667	3.78667	51.1267	3.33667	3.18	2.79	2.72	2.29333	2.89667	33.1333	2.79667	2.35667
368.22	3.32333	2.36333	2.02333	2.85333	41.5967	3.74333	2.58667	2.93	2.23333	2.78667	3.59	28.6267	3.61333	2.97667	4.86667	2.03333	2.43333	3.47	34.93	2.40667	3.18333	2.58667	2.28667	2.32	2.97667	50.54	7.24	5.07333	2.85	2.65	2.81333	2.97333	56.56	2.5	2.45667	4.21333	2.4	2.57667	3.80333	51.2	3.34667	3.18667	2.8	2.73333	2.29	2.89667	33.1933	2.8	2.36333
368.581	3.33667	2.35333	2.01667	2.87	41.6467	3.75667	2.60333	2.94	2.24	2.78	3.58	28.65	3.59667	2.98	4.88	2.04667	2.44667	3.47667	34.9467	2.40667	3.18667	2.58667	2.28	2.33	2.98	50.56	7.25	5.07333	2.86	2.66	2.82	2.98333	56.5967	2.5	2.46667	4.22333	2.40333	2.58333	3.80667	51.3067	3.35333	3.19667	2.80333	2.74	2.28333	2.89333	33.2267	2.80333	2.36
368.943	3.33333	2.35333	2.01	2.86333	41.7067	3.76	2.59667	2.93333	2.25	2.77333	3.59333	28.6733	3.59	2.98	4.88667	2.04	2.45667	3.49	34.9367	2.41333	3.18333	2.57	2.29	2.33	2.98333	50.5567	7.24	5.07	2.86	2.66333	2.81	2.99	56.62	2.50333	2.45333	4.22667	2.39667	2.57667	3.80667	51.37	3.35667	3.20333	2.80667	2.73	2.28333	2.89	33.2633	2.80667	2.35
369.304	3.34667	2.36	2.02333	2.85333	41.81	3.77333	2.61	2.93333	2.26333	2.78667	3.59333	28.7733	3.6	2.98333	4.89667	2.05333	2.45667	3.49333	34.9867	2.43333	3.19333	2.58667	2.29667	2.34	2.98	50.5633	7.24667	5.08	2.87333	2.68333	2.82	2.99667	56.7367	2.51333	2.47	4.23333	2.4	2.57333	3.81	51.4333	3.37	3.21	2.80667	2.73333	2.29	2.88667	33.2733	2.81333	2.36667
369.665	3.36	2.37333	2.02667	2.86333	41.8833	3.77333	2.63333	2.95333	2.27	2.79667	3.60667	28.82	3.60333	2.98	4.90667	2.06667	2.46	3.51	35.01	2.45333	3.19667	2.59667	2.3	2.35	3	50.58	7.24667	5.07333	2.88333	2.69333	2.82333	3	56.8133	2.52	2.48667	4.21333	2.4	2.57667	3.81	51.4867	3.35667	3.21667	2.81	2.73	2.29333	2.89667	33.28	2.81667	2.35667
370.025	3.34	2.37	2.02667	2.86333	41.9233	3.76333	2.62667	2.95667	2.26333	2.78333	3.59	28.84	3.59333	2.97333	4.92333	2.06333	2.45667	3.5	35.0433	2.45	3.18333	2.59667	2.29667	2.34667	3	50.5833	7.25333	5.07	2.87	2.68	2.82667	3	56.8933	2.51	2.47333	4.20333	2.38333	2.55667	3.78333	51.51	3.33	3.21333	2.78333	2.70667	2.27667	2.87333	33.2533	2.79667	2.35333
370.386	3.34	2.36	2.02333	2.85	41.99	3.76667	2.62	2.96333	2.25667	2.78333	3.59667	28.9167	3.6	2.97	4.91333	2.05667	2.46	3.5	35.0767	2.45333	3.19333	2.60667	2.29667	2.34667	3.00333	50.5833	7.26	5.06667	2.87	2.68667	2.83	2.99667	57.0033	2.51333	2.47333	4.19	2.37667	2.55333	3.79	51.5467	3.31667	3.20667	2.78333	2.69	2.27	2.88	33.2533	2.79	2.35
370.747	3.33667	2.35667	2.02	2.84	42.04	3.76333	2.61333	2.95667	2.25333	2.78333	3.58333	28.95	3.59	2.96	4.9	2.05	2.44333	3.48333	35.07	2.44667	3.18333	2.60333	2.28333	2.33	2.99333	50.56	7.25333	5.05667	2.86	2.67	2.82333	2.98333	57.0733	2.50333	2.47333	4.18	2.36667	2.55	3.78667	51.5667	3.31	3.19667	2.78667	2.68667	2.26	2.87	33.2633	2.77667	2.34667
371.108	3.33	2.35667	2.02	2.84333	42.0933	3.75	2.60667	2.95667	2.25667	2.78667	3.58667	28.9567	3.58667	2.94667	4.89	2.04333	2.43667	3.47667	35.0633	2.44667	3.16	2.61333	2.28333	2.32333	3	50.5733	7.25333	5.06	2.85333	2.67	2.81667	2.98667	57.1367	2.49667	2.45333	4.17667	2.37333	2.54	3.78333	51.61	3.3	3.18667	2.78667	2.69333	2.23667	2.87	33.2467	2.78	2.34333
371.469	3.31333	2.34	2.01	2.84	42.1533	3.73667	2.58667	2.94333	2.24667	2.77333	3.57667	28.9833	3.56333	2.94	4.89	2.03	2.43	3.46333	35.0733	2.42667	3.15667	2.6	2.26667	2.3	2.98	50.6	7.26	5.05	2.84333	2.66333	2.80667	2.96667	57.2467	2.48667	2.45	4.18	2.36	2.53	3.77	51.5933	3.30333	3.17667	2.77333	2.68333	2.23667	2.86333	33.2767	2.77333	2.34333
371.83	3.32333	2.33333	2.00333	2.83333	42.1533	3.72667	2.59	2.93	2.25333	2.79	3.58333	29	3.57333	2.94	4.87667	2.04	2.43	3.47667	35.05	2.43	3.15667	2.6	2.25667	2.29667	2.97	50.59	7.24333	5.05667	2.84	2.66333	2.80333	2.96667	57.3133	2.49	2.45667	4.19667	2.36667	2.54333	3.78667	51.65	3.30667	3.18667	2.78	2.68333	2.24667	2.89	33.2733	2.78333	2.34333
372.19	3.32	2.34	2.00667	2.84667	42.22	3.73	2.59	2.93333	2.25	2.78	3.59	29.01	3.57667	2.94667	4.87667	2.04667	2.42667	3.46667	35.0467	2.43	3.15	2.6	2.25667	2.29333	2.97667	50.5833	7.25	5.06333	2.84	2.66	2.79	2.97	57.3867	2.49333	2.45333	4.21667	2.37333	2.54667	3.78	51.6567	3.31333	3.18667	2.77667	2.69	2.25667	2.88	33.26	2.79333	2.35
372.551	3.33	2.35	2.00667	2.85333	42.26	3.72333	2.6	2.94	2.25667	2.78667	3.60667	29.0167	3.58333	2.95333	4.88333	2.03667	2.43667	3.47333	35.0933	2.43333	3.15333	2.60333	2.26	2.30333	2.98667	50.5467	7.24333	5.06333	2.84667	2.67667	2.8	2.97	57.5067	2.49	2.46	4.22667	2.39	2.57	3.78	51.7133	3.32667	3.20333	2.77333	2.70667	2.27333	2.89667	33.25	2.80333	2.36
372.912	3.33333	2.36333	2.01	2.86	42.2467	3.73667	2.61	2.95	2.27	2.79333	3.61333	29.0367	3.6	2.97	4.88	2.05333	2.45667	3.49	35.1233	2.42333	3.16667	2.60333	2.26667	2.32	2.98667	50.5533	7.26	5.06667	2.85667	2.68333	2.81333	2.98	57.5833	2.5	2.48	4.23667	2.38333	2.59	3.78333	51.7233	3.32333	3.20333	2.76667	2.7	2.28333	2.89667	33.24	2.80667	2.36333
373.272	3.34333	2.38333	2.02	2.87333	42.27	3.74333	2.6	2.95667	2.28667	2.80667	3.62333	29.05	3.62	2.97667	4.87333	2.05333	2.47	3.49667	35.1733	2.43	3.17333	2.61667	2.27333	2.34	3.00667	50.55	7.26333	5.08333	2.85	2.68333	2.81333	2.98667	57.6733	2.51	2.47667	4.24	2.39	2.59667	3.78667	51.7733	3.32333	3.19667	2.78	2.7	2.29	2.90333	33.24	2.80333	2.36667
373.633	3.34333	2.38333	2.02667	2.88	42.34	3.73333	2.59667	2.95333	2.29	2.79667	3.62333	29.1033	3.61667	2.98333	4.87667	2.04667	2.48	3.49667	35.2333	2.42	3.18333	2.61333	2.27333	2.33333	3.02	50.5933	7.28	5.08333	2.85667	2.68333	2.81333	2.99	57.7267	2.50333	2.47667	4.23667	2.39333	2.6	3.77	51.7967	3.31	3.19	2.79	2.70333	2.29333	2.88667	33.2967	2.80333	2.37333
373.993	3.33	2.38333	2.01	2.87	42.3467	3.72667	2.57333	2.94	2.28	2.79667	3.60333	29.11	3.61333	2.97	4.85	2.04	2.47	3.49333	35.2433	2.41	3.17333	2.6	2.27	2.33	3.00333	50.6333	7.26	5.07	2.85	2.68	2.82667	2.98	57.7733	2.48667	2.48	4.25	2.39667	2.61333	3.78	51.87	3.32	3.20667	2.8	2.71	2.3	2.89333	33.34	2.81333	2.38
374.354	3.32333	2.36333	2.01	2.85667	42.37	3.69667	2.55	2.93	2.26333	2.77333	3.58333	29.16	3.58667	2.95	4.82333	2.03333	2.45333	3.48667	35.28	2.38333	3.16667	2.58667	2.25667	2.31	2.99	50.66	7.25667	5.06333	2.82	2.65667	2.80667	2.96333	57.7967	2.47	2.46333	4.24667	2.39	2.61333	3.79	51.8833	3.31333	3.2	2.79667	2.69667	2.3	2.87667	33.3433	2.81667	2.38667
374.714	3.31	2.34667	1.99667	2.84333	42.4167	3.68	2.54	2.92	2.24	2.76	3.57333	29.1933	3.57667	2.93333	4.81667	2.01667	2.43667	3.46667	35.3167	2.37333	3.14667	2.57667	2.25667	2.29	2.98333	50.6633	7.24	5.04667	2.8	2.64333	2.79	2.95333	57.8367	2.46333	2.45	4.25	2.38333	2.61	3.79	51.9367	3.32333	3.21	2.80667	2.69333	2.3	2.87	33.39	2.81333	2.38333
375.075	3.31667	2.34	1.99667	2.84667	42.52	3.69	2.55667	2.92	2.25	2.76333	3.58667	29.2633	3.56667	2.93667	4.83333	2.02333	2.45667	3.48	35.3533	2.39	3.16	2.58	2.26333	2.30333	2.98	50.7033	7.24333	5.05333	2.81	2.65	2.80333	2.96	57.8833	2.47	2.45333	4.25333	2.39	2.61333	3.79333	52	3.32667	3.21667	2.80667	2.7	2.3	2.87667	33.4333	2.82333	2.38667
375.435	3.31333	2.33333	1.99667	2.84667	42.5833	3.69667	2.57333	2.92333	2.25667	2.77	3.59667	29.3367	3.57	2.95	4.84	2.02667	2.44667	3.48	35.4433	2.4	3.16667	2.58333	2.27667	2.31333	2.98333	50.7967	7.25333	5.06333	2.81	2.65333	2.81667	2.97	58.0167	2.48	2.45	4.26	2.39333	2.61333	3.80667	52.13	3.33667	3.22333	2.80333	2.71	2.3	2.88333	33.47	2.84	2.38333
375.795	3.32667	2.33333	2.01333	2.84667	42.6533	3.69333	2.58	2.93	2.27333	2.78	3.61667	29.3933	3.58667	2.96	4.87	2.04333	2.46667	3.48333	35.53	2.41333	3.18667	2.59667	2.28333	2.33	2.99	50.79	7.26	5.08	2.82	2.66	2.82667	2.98333	58.0833	2.49333	2.45667	4.23333	2.39667	2.59	3.8	52.1633	3.32333	3.21	2.79	2.7	2.27667	2.87667	33.49	2.83333	2.36333
376.156	3.33	2.35	2.02667	2.86	42.73	3.72667	2.59667	2.94333	2.29333	2.81333	3.63667	29.4767	3.61	2.98667	4.89	2.05667	2.48667	3.50333	35.59	2.43667	3.2	2.62333	2.30333	2.35	3.01667	50.8567	7.27	5.1	2.85333	2.67	2.86	2.99667	58.17	2.51	2.47333	4.24333	2.40667	2.59333	3.8	52.24	3.33	3.22333	2.80333	2.71333	2.28	2.89333	33.54	2.85	2.36667
376.516	3.33333	2.35667	2.04	2.86333	42.82	3.72	2.59667	2.94333	2.30667	2.83	3.64	29.57	3.62333	3.00333	4.89	2.07333	2.49667	3.50667	35.6833	2.43667	3.21667	2.63	2.29667	2.36333	3.02667	50.9233	7.28333	5.11	2.85333	2.68	2.87333	3.00333	58.2533	2.51	2.47	4.23333	2.40333	2.58333	3.79333	52.3033	3.31	3.21333	2.79333	2.71	2.27667	2.88667	33.5733	2.85	2.36333
376.876	3.32667	2.35333	2.02667	2.85	42.8167	3.69667	2.58333	2.92667	2.27667	2.82	3.63333	29.62	3.62	2.99333	4.88333	2.06333	2.46667	3.49667	35.7133	2.42333	3.19333	2.61667	2.28	2.34	3.02333	50.9067	7.26	5.09667	2.84	2.67333	2.85667	2.97667	58.2867	2.48667	2.46	4.21333	2.37667	2.55	3.76667	52.36	3.28333	3.18667	2.76333	2.69	2.25	2.87	33.5633	2.83	2.34
377.236	3.33333	2.35667	2.03667	2.83667	42.8333	3.69	2.57667	2.93333	2.27333	2.82667	3.63	29.6467	3.62	2.99667	4.87333	2.06333	2.46667	3.50333	35.7167	2.42	3.19667	2.62333	2.28333	2.33667	3.02667	50.8467	7.25	5.09667	2.84	2.67333	2.85667	2.96667	58.25	2.48667	2.47	4.21	2.37	2.54	3.77333	52.3767	3.28	3.17667	2.76333	2.68667	2.24667	2.86333	33.5833	2.81667	2.33
377.596	3.31667	2.36333	2.02	2.83667	42.8833	3.67333	2.57	2.92667	2.27	2.81333	3.63333	29.7033	3.60667	2.98667	4.85333	2.04667	2.46	3.49	35.7633	2.41	3.18667	2.61333	2.28333	2.31333	3.03	50.8967	7.25333	5.09667	2.82333	2.67	2.84	2.94333	58.3	2.48	2.45333	4.23333	2.37333	2.54667	3.77667	52.47	3.28	3.18333	2.76667	2.7	2.25667	2.87333	33.6533	2.82667	2.34667
377.956	3.31333	2.36	2.02	2.86	42.9067	3.66	2.56667	2.92	2.25667	2.81333	3.63667	29.7333	3.61	2.98	4.85333	2.04667	2.46	3.5	35.81	2.41333	3.19333	2.61	2.28667	2.31333	3.03333	50.8733	7.26333	5.1	2.81667	2.67667	2.83333	2.95	58.3067	2.48333	2.45667	4.22333	2.36333	2.53667	3.77667	52.5733	3.27667	3.16333	2.76	2.69333	2.25667	2.88	33.7233	2.81667	2.35
378.317	3.31333	2.36	2.02	2.87667	42.9267	3.67	2.56667	2.91667	2.26333	2.80667	3.63667	29.7633	3.60667	2.98	4.85	2.04667	2.46	3.51	35.8067	2.42667	3.19667	2.60333	2.29	2.31	3.03667	50.8367	7.25667	5.10667	2.82667	2.67333	2.83333	2.95	58.2933	2.49	2.46	4.23667	2.36333	2.54	3.78	52.7	3.29	3.18	2.77667	2.7	2.26	2.89667	33.8	2.80667	2.35
378.677	3.31	2.36	2.03	2.88667	43.0067	3.68	2.58	2.93	2.27	2.79667	3.63333	29.8233	3.61667	2.98667	4.86333	2.05	2.47	3.50667	35.88	2.42667	3.21333	2.6	2.3	2.31	3.02667	50.8833	7.28667	5.11	2.83333	2.67667	2.83667	2.97	58.34	2.50333	2.47333	4.25667	2.39	2.56333	3.8	52.7967	3.31	3.2	2.79667	2.71	2.28333	2.91	33.8733	2.82333	2.36667
379.036	3.3	2.36	2.02	2.9	43.0733	3.67667	2.58	2.91667	2.27667	2.8	3.63333	29.8767	3.62667	2.98	4.86333	2.05	2.47667	3.5	35.9533	2.42	3.21	2.60667	2.29333	2.29	3.03	50.8933	7.28667	5.11333	2.82667	2.67333	2.83667	2.97667	58.42	2.48667	2.46667	4.26667	2.39	2.57667	3.79333	52.8767	3.31333	3.21667	2.80333	2.71667	2.28667	2.93	33.9167	2.83667	2.38333
379.396	3.31333	2.35333	2.01667	2.90333	43.1067	3.68667	2.57667	2.91667	2.27	2.80333	3.62667	29.9133	3.63	2.98667	4.86667	2.05667	2.47667	3.51333	35.9733	2.42667	3.20333	2.60333	2.28667	2.29333	3.03333	50.86	7.29	5.11	2.83333	2.67333	2.84333	2.98667	58.42	2.48	2.48667	4.26333	2.39333	2.58333	3.80667	52.9167	3.31	3.22	2.81	2.72333	2.29667	2.93	33.8833	2.83667	2.38
379.756	3.30333	2.35	1.99333	2.89	43.09	3.68	2.56667	2.89333	2.26333	2.78667	3.61333	29.95	3.63	2.97	4.84667	2.03667	2.46	3.50667	35.9667	2.41333	3.19	2.58	2.26333	2.28333	3.02667	50.79	7.27667	5.08667	2.81	2.65333	2.83667	2.99	58.4067	2.47	2.47	4.26333	2.4	2.59333	3.81333	52.92	3.30667	3.23333	2.81	2.72	2.30333	2.92667	33.8767	2.84667	2.37667
380.116	3.30333	2.34667	1.99	2.87333	43.1	3.67333	2.57333	2.89333	2.25667	2.77667	3.61333	29.9833	3.62667	2.96667	4.83333	2.03667	2.45333	3.50333	35.9967	2.40667	3.19	2.56333	2.26333	2.27	3.02333	50.7633	7.29	5.08	2.81333	2.65333	2.83	2.98667	58.42	2.45333	2.47333	4.26	2.40667	2.59667	3.80667	52.9467	3.31333	3.23667	2.8	2.73	2.29333	2.92	33.8667	2.85333	2.39
380.476	3.31	2.34333	1.98333	2.87667	43.0567	3.67	2.56333	2.88667	2.27	2.78667	3.62	30	3.63667	2.97	4.81333	2.04667	2.45667	3.50667	35.9833	2.40667	3.17667	2.57333	2.26333	2.28333	3.04333	50.6867	7.29333	5.08333	2.81667	2.65667	2.83	2.98333	58.4333	2.45667	2.46333	4.24333	2.40333	2.59333	3.81333	52.93	3.31	3.23667	2.8	2.72667	2.29	2.91333	33.83	2.85333	2.38
380.836	3.30333	2.34	1.98333	2.87333	43.0567	3.67333	2.55	2.88	2.26667	2.77667	3.61667	30.02	3.62	2.96333	4.80333	2.04	2.46	3.51	35.97	2.42	3.18	2.55333	2.25333	2.28667	3.04	50.6333	7.30333	5.07333	2.81333	2.66	2.83	2.98	58.41	2.45667	2.46	4.24	2.42	2.58333	3.82667	52.9433	3.32	3.24	2.8	2.73333	2.3	2.91333	33.8267	2.86	2.38667
381.195	3.31333	2.34333	1.99333	2.87667	43.1	3.67	2.56	2.89667	2.26667	2.78667	3.62333	30.0933	3.61667	2.97	4.80667	2.04	2.46667	3.53	36.0433	2.42667	3.19667	2.55	2.25333	2.3	3.05	50.68	7.32667	5.08667	2.81333	2.67333	2.83333	2.99667	58.52	2.46333	2.46667	4.24333	2.42667	2.58	3.82333	52.9867	3.32	3.27	2.8	2.73333	2.29333	2.92333	33.8733	2.87	2.4
381.555	3.31667	2.34667	2.00333	2.88	43.1833	3.67333	2.56667	2.90333	2.27667	2.79	3.63	30.14	3.62	2.98333	4.81	2.05	2.48667	3.52667	36.1133	2.42667	3.20333	2.55333	2.27333	2.30667	3.06	50.7633	7.33333	5.1	2.82667	2.68	2.83	2.99333	58.5933	2.44667	2.47	4.24667	2.43	2.59	3.82667	53.0433	3.32333	3.28333	2.80667	2.74333	2.30667	2.92333	33.89	2.87333	2.4
381.915	3.31667	2.34667	2.00667	2.88	43.24	3.68	2.55667	2.91333	2.27333	2.79	3.63	30.2033	3.62667	2.99	4.82	2.05	2.48	3.53667	36.1567	2.42667	3.20667	2.57	2.27	2.31667	3.06333	50.8	7.33333	5.10667	2.82667	2.67333	2.83667	2.99333	58.6667	2.45333	2.46	4.24333	2.42667	2.57667	3.84	53.0633	3.31	3.27333	2.81667	2.74	2.31	2.92333	33.9033	2.87667	2.39
382.274	3.31	2.34	2.00667	2.87333	43.27	3.67333	2.54333	2.90333	2.26333	2.79	3.63667	30.2733	3.61	2.98333	4.83	2.04333	2.48333	3.53667	36.2367	2.42667	3.20333	2.55667	2.26667	2.31333	3.05667	50.77	7.34	5.11667	2.81667	2.66333	2.84	2.98	58.6433	2.44333	2.45333	4.25	2.43333	2.58667	3.84333	53.13	3.32333	3.27333	2.82	2.74667	2.31333	2.93333	33.9533	2.88333	2.41
382.634	3.30333	2.34667	2.00333	2.87	43.3	3.66667	2.54667	2.91	2.25667	2.80333	3.63667	30.3433	3.62333	2.98333	4.83667	2.05	2.48	3.54	36.31	2.41333	3.20667	2.56	2.28	2.32333	3.07	50.7733	7.35333	5.12	2.82	2.66667	2.83333	2.97667	58.7267	2.44	2.45667	4.25667	2.43	2.59	3.84667	53.1833	3.31667	3.27333	2.81667	2.75333	2.31667	2.93667	34	2.87667	2.40333
382.994	3.30333	2.35	2.00667	2.86667	43.2933	3.66333	2.54333	2.90667	2.25667	2.80333	3.64333	30.3433	3.63333	2.97667	4.82333	2.05	2.47667	3.53667	36.3033	2.40333	3.21667	2.55667	2.28	2.31667	3.06	50.68	7.34333	5.12	2.82	2.66333	2.82667	2.96333	58.6533	2.43667	2.45333	4.26	2.42667	2.59	3.83667	53.2	3.33	3.26333	2.80333	2.75667	2.31667	2.94333	34.0133	2.86333	2.40333
383.353	3.30667	2.35	2.00333	2.87	43.3567	3.65667	2.54	2.91	2.25333	2.8	3.64	30.4333	3.63333	2.97333	4.83	2.06667	2.46333	3.54667	36.34	2.41	3.20667	2.57667	2.27333	2.31333	3.05667	50.7	7.35333	5.12	2.81667	2.65333	2.82667	2.96333	58.71	2.44	2.44	4.26667	2.43667	2.59333	3.85	53.21	3.33333	3.27333	2.82	2.75667	2.32333	2.96333	34.07	2.87667	2.42
383.712	3.30667	2.35667	2.00667	2.87	43.3467	3.64667	2.56	2.92	2.26	2.81333	3.64333	30.45	3.64	2.97333	4.83333	2.06	2.48	3.55	36.38	2.41333	3.22	2.56	2.28667	2.32333	3.07	50.65	7.36333	5.11333	2.82	2.66333	2.82	2.97	58.7167	2.44667	2.44667	4.27333	2.44333	2.59333	3.85333	53.2333	3.34	3.27667	2.80333	2.74333	2.31667	2.96667	34.08	2.88333	2.42
384.072	3.31333	2.36667	2.00333	2.88333	43.3833	3.65	2.57333	2.92	2.26	2.81333	3.65	30.4733	3.65333	2.97333	4.81667	2.05667	2.47333	3.55	36.4067	2.41667	3.23	2.57	2.28	2.32	3.07	50.6767	7.36	5.11	2.83667	2.65667	2.81	2.98333	58.8067	2.45	2.45	4.29667	2.45667	2.61	3.87	53.2733	3.34667	3.30333	2.82	2.76	2.34667	2.98	34.09	2.89667	2.43333
384.431	3.31667	2.35333	2.00667	2.87	43.4267	3.65	2.57667	2.91667	2.26	2.80667	3.64667	30.52	3.65667	2.98	4.82	2.05	2.46667	3.53667	36.4	2.41667	3.22333	2.57333	2.27	2.32	3.07667	50.7033	7.36333	5.11	2.83333	2.65333	2.81333	2.99333	58.81	2.46	2.44667	4.29	2.45333	2.61	3.86333	53.31	3.35	3.3	2.82	2.75	2.34667	2.97333	34.06	2.91667	2.42667
384.791	3.33333	2.36667	2.01667	2.87667	43.43	3.66667	2.59	2.93	2.27	2.81333	3.66	30.5833	3.66	3.00667	4.84667	2.06	2.48333	3.53667	36.43	2.43667	3.22667	2.58667	2.29	2.34333	3.09333	50.7533	7.38333	5.11667	2.84333	2.65667	2.83667	3.01	58.8333	2.47667	2.46	4.28333	2.45	2.61	3.87	53.3867	3.33667	3.29333	2.82667	2.74333	2.34333	2.97333	34.0833	2.90333	2.42667
385.15	3.33	2.36	2.03	2.87333	43.3967	3.67	2.59	2.93	2.27667	2.82667	3.67333	30.58	3.67	3.02	4.84333	2.04667	2.49667	3.53333	36.46	2.44	3.24	2.58667	2.28667	2.34	3.11	50.6967	7.4	5.12	2.84	2.66667	2.84667	3.02	58.86	2.48	2.47	4.26333	2.43667	2.59	3.85667	53.4567	3.31667	3.27	2.8	2.74	2.32	2.97	34.0467	2.89	2.41667
385.509	3.33333	2.35667	2.02333	2.87667	43.4267	3.66667	2.57667	2.92333	2.27333	2.81667	3.67	30.6	3.67667	3.02667	4.84	2.05333	2.49667	3.54	36.4767	2.45333	3.25	2.6	2.28	2.33333	3.10667	50.6733	7.42	5.13333	2.83667	2.67	2.85333	3.00667	58.8667	2.48	2.46667	4.23333	2.43667	2.58667	3.84667	53.4833	3.31333	3.27333	2.80333	2.73	2.32	2.96	34.07	2.89	2.42333
385.868	3.35667	2.36333	2.04	2.88667	43.4567	3.69333	2.58333	2.93333	2.29	2.83667	3.68333	30.6333	3.70333	3.04667	4.85	2.07667	2.50333	3.56333	36.49	2.46333	3.27	2.60667	2.28667	2.35333	3.12333	50.6733	7.45333	5.16	2.84333	2.69667	2.87333	3.01667	58.9367	2.49333	2.48667	4.23667	2.43333	2.58	3.84	53.5367	3.30667	3.27	2.79667	2.71333	2.30667	2.95	34.0867	2.89	2.42
386.228	3.37333	2.37667	2.06	2.92	43.4567	3.71333	2.6	2.94667	2.29667	2.85667	3.69667	30.6367	3.73	3.06333	4.86	2.08667	2.51667	3.59333	36.5567	2.47667	3.29333	2.62333	2.30333	2.36333	3.14	50.6333	7.48	5.17	2.85667	2.70333	2.89	3.02667	59.01	2.50667	2.49	4.22667	2.42333	2.58	3.84	53.5333	3.30333	3.27	2.78667	2.70667	2.29333	2.94333	34.08	2.87	2.43
386.587	3.35333	2.37	2.05333	2.91667	43.48	3.69333	2.59333	2.94	2.29667	2.84333	3.69333	30.6633	3.73333	3.03667	4.83667	2.09667	2.51	3.59	36.6	2.47667	3.29	2.62	2.29333	2.35333	3.14667	50.6333	7.48	5.17667	2.84667	2.7	2.88667	3.01333	59.0933	2.49667	2.48	4.22	2.42333	2.58667	3.83333	53.5067	3.29667	3.28	2.78333	2.71	2.29	2.93	34.0633	2.89667	2.42667
386.946	3.33667	2.36	2.04	2.90333	43.46	3.67333	2.57	2.93	2.27	2.83333	3.66667	30.6533	3.71	3.01667	4.81667	2.07333	2.47667	3.57667	36.6333	2.46	3.28	2.60333	2.27667	2.34333	3.14333	50.6167	7.47	5.16	2.82667	2.68667	2.87333	2.99333	59.1367	2.48667	2.46333	4.23333	2.42	2.59333	3.83333	53.4933	3.30667	3.3	2.79667	2.71	2.3	2.92	34.06	2.91	2.42667
387.305	3.34667	2.37	2.04667	2.91667	43.5367	3.69333	2.56667	2.93667	2.27333	2.84	3.67333	30.71	3.72667	3.01667	4.82	2.07	2.48333	3.58667	36.7433	2.46	3.27	2.61333	2.28667	2.34667	3.16333	50.6933	7.48333	5.17667	2.82667	2.68333	2.89	3	59.2767	2.49	2.47333	4.24667	2.41667	2.59667	3.83667	53.57	3.31	3.29667	2.78333	2.71333	2.29333	2.92	34.0633	2.89667	2.41667
387.664	3.33	2.37	2.03333	2.90667	43.5533	3.68333	2.56667	2.92	2.26	2.83	3.67333	30.7433	3.71333	3.00667	4.82	2.06	2.47	3.57667	36.82	2.45667	3.26	2.61333	2.29333	2.33667	3.16	50.7267	7.48	5.16	2.81667	2.66667	2.88333	3	59.3333	2.47333	2.45333	4.23333	2.41	2.59333	3.83	53.59	3.3	3.30333	2.78	2.71667	2.28333	2.93333	34.0833	2.9	2.41333
388.023	3.32	2.36333	2.02	2.89333	43.5933	3.67333	2.55	2.91667	2.26	2.82	3.66667	30.78	3.71667	3	4.81333	2.04667	2.46667	3.57333	36.8633	2.44	3.24	2.60333	2.29	2.32667	3.14333	50.78	7.47667	5.17	2.80667	2.67333	2.86667	2.98667	59.3867	2.45667	2.45	4.26333	2.43333	2.62	3.86667	53.69	3.31667	3.32333	2.8	2.74	2.29667	2.95667	34.17	2.92667	2.43
388.382	3.34667	2.36667	2.02	2.89	43.6367	3.69	2.55	2.91333	2.25667	2.82667	3.67333	30.7967	3.73	3.01667	4.82	2.03	2.47333	3.58667	36.94	2.43333	3.24	2.60667	2.29	2.33667	3.14667	50.83	7.50667	5.19333	2.82	2.68	2.87333	2.99	59.5167	2.45	2.45333	4.28667	2.44667	2.62333	3.88	53.7433	3.32667	3.33	2.81	2.75333	2.30333	2.97333	34.2167	2.93333	2.43333
388.741	3.36333	2.39333	2.03	2.91667	43.7133	3.70333	2.58333	2.90667	2.27	2.83667	3.69333	30.8433	3.77333	3.03333	4.83333	2.05333	2.48	3.62	37.0267	2.45667	3.25333	2.62333	2.31	2.35	3.17	50.8867	7.52667	5.22	2.83667	2.70333	2.89333	3.00333	59.6033	2.45333	2.47	4.28	2.45333	2.62333	3.88333	53.7967	3.31333	3.33	2.8	2.76	2.30333	2.97333	34.2533	2.93333	2.43333
389.1	3.35333	2.38333	2.02333	2.92333	43.7333	3.69	2.59333	2.91	2.26667	2.82	3.69	30.8667	3.75667	3.03333	4.83	2.05	2.47	3.61667	37.06	2.44667	3.26	2.62	2.31	2.34667	3.16333	50.93	7.52667	5.22	2.84	2.7	2.88	2.99333	59.69	2.45	2.46	4.29333	2.46333	2.64667	3.91	53.8433	3.33	3.34667	2.81667	2.78333	2.32	3.00333	34.2967	2.96	2.45
389.458	3.36	2.37333	2.03	2.92	43.73	3.68	2.58667	2.92667	2.26	2.82	3.68	30.89	3.76667	3.04333	4.82	2.06667	2.47667	3.61667	37.1067	2.45667	3.26333	2.62	2.30333	2.34667	3.17667	50.9533	7.53333	5.22333	2.84667	2.70667	2.88	2.99	59.7433	2.45333	2.47333	4.27667	2.46333	2.64333	3.9	53.9	3.33	3.33667	2.79667	2.78	2.31667	2.99667	34.3133	2.96333	2.44
389.817	3.37667	2.37667	2.04	2.93333	43.7233	3.69333	2.59	2.94	2.27667	2.82667	3.69667	30.9067	3.76667	3.06333	4.83	2.08667	2.49	3.64667	37.1833	2.46667	3.29333	2.63333	2.31667	2.36333	3.21	50.97	7.55667	5.23333	2.85	2.71333	2.89	3.01	59.8133	2.47333	2.48	4.28	2.47667	2.64667	3.9	53.94	3.35	3.33667	2.81333	2.78	2.32333	3	34.3267	2.97333	2.45667
390.176	3.35333	2.36	2.02667	2.92667	43.7633	3.67333	2.59	2.93333	2.27667	2.83	3.70333	30.9567	3.75333	3.06	4.82333	2.08333	2.48333	3.64	37.2433	2.46333	3.30333	2.63333	2.32	2.35667	3.21333	51.0267	7.55667	5.23	2.84333	2.7	2.87333	3.00333	59.9167	2.48	2.47667	4.26333	2.46333	2.62667	3.89	54.0033	3.35	3.32667	2.79	2.76333	2.30667	2.98667	34.3233	2.96667	2.45667
390.535	3.37	2.36	2.03333	2.93333	43.7733	3.69333	2.58333	2.95	2.29333	2.83333	3.71667	31.02	3.75667	3.07333	4.83	2.10667	2.5	3.66333	37.2967	2.46333	3.30667	2.63667	2.33	2.37333	3.22333	51.0533	7.58	5.23667	2.86333	2.7	2.88667	3.02	59.9533	2.50333	2.48667	4.28	2.46667	2.62667	3.89333	54.08	3.35333	3.33	2.79	2.76333	2.32333	3	34.3567	2.98667	2.46333
390.893	3.37	2.36	2.04	2.93667	43.7767	3.69	2.58333	2.94667	2.30667	2.85333	3.71667	31.06	3.76	3.07333	4.82667	2.10333	2.50667	3.67667	37.38	2.46333	3.30333	2.63667	2.33	2.38667	3.23667	51.0767	7.58667	5.25667	2.85667	2.70667	2.88667	3.03	59.99	2.5	2.48667	4.29667	2.47333	2.64	3.90333	54.0967	3.34667	3.34	2.8	2.76333	2.32667	3.00333	34.34	2.99667	2.46667
391.252	3.37667	2.36333	2.03	2.95	43.8133	3.7	2.58333	2.94333	2.31333	2.86667	3.73	31.1167	3.77	3.08	4.83	2.1	2.51	3.69333	37.4267	2.47333	3.30333	2.64333	2.34667	2.4	3.24667	51.15	7.61	5.26667	2.86	2.70667	2.89333	3.04333	60.0267	2.5	2.48667	4.31	2.47667	2.64	3.91333	54.1033	3.34667	3.34333	2.80333	2.77667	2.33	3	34.36	3	2.47667
391.611	3.36	2.35667	2.02333	2.93667	43.8767	3.69	2.57667	2.92333	2.30667	2.86	3.72667	31.2033	3.76667	3.07	4.82333	2.08667	2.50333	3.69	37.5233	2.47	3.28667	2.63667	2.34333	2.38333	3.24333	51.2067	7.61	5.26667	2.85667	2.7	2.88667	3.03333	60.0567	2.48667	2.49333	4.29	2.45	2.61333	3.9	54.14	3.32333	3.34	2.79	2.77333	2.31333	3	34.4067	2.97667	2.45667
391.969	3.38333	2.37	2.03333	2.96667	43.9233	3.71333	2.58	2.94333	2.32333	2.87	3.73	31.31	3.78333	3.07667	4.83	2.11333	2.51667	3.72333	37.64	2.48667	3.29667	2.65333	2.36333	2.39333	3.26667	51.25	7.63667	5.28667	2.87	2.72	2.91	3.05333	60.1033	2.50333	2.50333	4.29333	2.45667	2.63	3.90667	54.2133	3.32333	3.34333	2.80667	2.78333	2.32333	3.01	34.4733	3	2.46
392.328	3.38	2.37	2.04	2.98333	43.9567	3.70333	2.58	2.94667	2.33333	2.86667	3.74	31.39	3.78667	3.07333	4.84	2.11333	2.53333	3.72333	37.7567	2.49667	3.29667	2.66667	2.37	2.39333	3.26333	51.36	7.64667	5.29	2.86	2.72667	2.92	3.05	60.2	2.49	2.51	4.32	2.47667	2.64667	3.93333	54.3167	3.35667	3.37	2.82333	2.79333	2.33	3.02333	34.5367	3.01667	2.48333
392.686	3.37	2.36333	2.02667	2.97333	44	3.70667	2.58	2.94667	2.33	2.85667	3.75	31.47	3.78333	3.07	4.84	2.10333	2.53333	3.71	37.8433	2.49	3.30333	2.67	2.37	2.38	3.26	51.3933	7.66	5.27	2.85333	2.71667	2.90667	3.04667	60.26	2.48667	2.51	4.33333	2.48	2.65	3.94	54.4433	3.37667	3.39	2.83667	2.80667	2.33333	3.04667	34.66	3.03333	2.5
393.044	3.36	2.36333	2.02667	2.97667	44.0367	3.69667	2.56333	2.94333	2.31333	2.84667	3.74333	31.5233	3.77333	3.04667	4.83333	2.1	2.53667	3.70333	37.9267	2.48667	3.29667	2.66	2.35667	2.36667	3.25667	51.4133	7.65667	5.26333	2.85333	2.71	2.9	3.03	60.31	2.47667	2.51667	4.36333	2.49	2.66667	3.95333	54.61	3.4	3.42	2.85333	2.81333	2.35333	3.06333	34.7533	3.05667	2.51667
393.403	3.37667	2.37333	2.03333	2.99333	44.0133	3.7	2.57667	2.96333	2.31333	2.85667	3.75	31.5367	3.78333	3.05	4.84667	2.11333	2.55333	3.70667	37.9433	2.5	3.30667	2.66667	2.36333	2.37333	3.27	51.3967	7.68667	5.26667	2.85667	2.72333	2.91	3.04	60.33	2.48	2.52667	4.37333	2.5	2.68333	3.98	54.6767	3.41667	3.44	2.87	2.83	2.37667	3.07333	34.77	3.08667	2.54
393.761	3.37667	2.37667	2.03333	2.99333	43.9833	3.69333	2.57667	2.97333	2.30667	2.84667	3.75333	31.5233	3.78667	3.06333	4.84	2.11333	2.56667	3.70667	37.95	2.50333	3.30667	2.67667	2.37333	2.38333	3.29	51.35	7.69333	5.26667	2.86333	2.72667	2.90667	3.05	60.2767	2.48333	2.53667	4.37	2.51	2.68667	3.99667	54.7433	3.43	3.45	2.87667	2.83333	2.38333	3.08	34.81	3.08	2.55
394.12	3.37667	2.37333	2.02333	2.98667	43.9567	3.68333	2.57667	2.96	2.30333	2.85	3.74333	31.51	3.79	3.06333	4.83333	2.10667	2.54667	3.7	37.9633	2.49667	3.31667	2.65667	2.36667	2.38333	3.30333	51.2967	7.69667	5.25667	2.87	2.72	2.89333	3.03	60.2333	2.48	2.53333	4.33	2.49	2.66	3.97	54.7233	3.39667	3.41667	2.86	2.81	2.37	3.05333	34.79	3.05	2.52333
394.478	3.38667	2.38	2.04	2.99333	43.91	3.68333	2.57333	2.97	2.29667	2.86333	3.74667	31.51	3.80667	3.08	4.83667	2.12	2.54667	3.72667	37.95	2.50667	3.31667	2.65333	2.37	2.39667	3.32667	51.23	7.70333	5.27333	2.88667	2.72333	2.89667	3.04333	60.14	2.48667	2.53333	4.31333	2.49	2.66	3.97333	54.66	3.37333	3.41667	2.84667	2.8	2.37	3.04667	34.73	3.03333	2.52333
394.836	3.38667	2.37667	2.05333	3.00667	43.8667	3.68667	2.59333	2.96667	2.3	2.86667	3.75667	31.51	3.81667	3.11333	4.84333	2.12667	2.54333	3.74	37.9667	2.51	3.33	2.66	2.38333	2.40333	3.35	51.1733	7.7	5.28	2.9	2.73	2.90667	3.05333	60.0667	2.49333	2.52	4.31	2.5	2.66667	3.99333	54.6367	3.36667	3.41667	2.86	2.80667	2.37333	3.06	34.71	3.06	2.53333
395.194	3.39	2.38667	2.07	3.02333	43.88	3.70667	2.60667	2.98	2.31667	2.88	3.77333	31.5633	3.83	3.12	4.84333	2.14	2.53667	3.75667	38.04	2.51	3.35	2.67333	2.40667	2.43	3.37333	51.1867	7.71333	5.29	2.92	2.74333	2.92667	3.06333	60.0267	2.51333	2.53333	4.29	2.49667	2.65	3.97333	54.6533	3.34667	3.39667	2.84333	2.78667	2.36667	3.04667	34.69	3.03667	2.52
395.552	3.39667	2.37667	2.07	3.02	43.86	3.69667	2.59667	2.96333	2.30667	2.87667	3.77	31.5833	3.83	3.12	4.84667	2.13	2.53	3.76333	38.07	2.50333	3.34	2.67333	2.39667	2.42333	3.36333	51.17	7.71667	5.27667	2.91	2.74	2.93	3.05	59.9467	2.49333	2.51667	4.31	2.49333	2.65333	3.98	54.64	3.33333	3.41	2.83667	2.78	2.36	3.05	34.7067	3.05333	2.51667
395.91	3.39333	2.38667	2.08	3.03	43.8233	3.69667	2.59333	2.97333	2.31333	2.87667	3.77333	31.5967	3.82667	3.11667	4.85	2.14	2.54667	3.78667	38.0433	2.51333	3.34333	2.68333	2.40667	2.42667	3.37667	51.11	7.73667	5.29667	2.90667	2.74667	2.93333	3.06333	59.8833	2.5	2.53333	4.33667	2.50667	2.68333	4.00333	54.6733	3.35333	3.44333	2.85667	2.80667	2.38667	3.08	34.7533	3.09333	2.54667
396.269	3.41333	2.41	2.08333	3.04	43.7767	3.69333	2.60667	2.98333	2.31667	2.87	3.77667	31.62	3.84	3.12	4.86333	2.15333	2.56333	3.79333	38.0933	2.50333	3.35	2.69667	2.42667	2.43	3.38667	51.1133	7.74333	5.29667	2.91	2.75	2.95667	3.06333	59.87	2.51333	2.54667	4.33	2.49667	2.67333	3.99667	54.75	3.34	3.43333	2.85333	2.80333	2.37667	3.08333	34.8033	3.08333	2.54333
396.627	3.42	2.41667	2.08	3.03667	43.78	3.69333	2.6	2.99667	2.32667	2.86667	3.77667	31.65	3.84	3.11667	4.86	2.14667	2.57333	3.81	38.1233	2.49	3.36	2.71333	2.42333	2.44667	3.4	51.1	7.75667	5.29333	2.9	2.75667	2.96	3.06667	59.88	2.50667	2.55667	4.31667	2.49667	2.66	3.97	54.7233	3.34	3.42667	2.82667	2.8	2.37	3.07667	34.7967	3.05	2.52667
396.985	3.42333	2.42333	2.07	3.03333	43.75	3.68	2.58667	2.98667	2.32	2.85333	3.77667	31.6333	3.83	3.11667	4.86333	2.14333	2.57667	3.81	38.0867	2.49667	3.37	2.71	2.41333	2.43667	3.39667	51.0167	7.74333	5.28	2.88667	2.73333	2.94667	3.07667	59.8167	2.49667	2.55	4.34	2.51333	2.68	3.98667	54.74	3.34333	3.46	2.82667	2.81667	2.38333	3.08333	34.8433	3.07	2.54
397.342	3.39667	2.41	2.05333	3.02667	43.7333	3.67	2.57	2.98	2.31333	2.84	3.76	31.66	3.82	3.09667	4.85	2.12667	2.56	3.79333	38.15	2.48333	3.36333	2.70333	2.41667	2.43667	3.39667	50.9733	7.72333	5.27	2.87667	2.72333	2.93333	3.06667	59.7967	2.47667	2.53333	4.34667	2.53667	2.67333	4.00667	54.7767	3.35667	3.46667	2.84333	2.83667	2.39	3.09	34.8533	3.08	2.56
397.7	3.4	2.40333	2.05333	3.03667	43.77	3.67	2.57	2.97	2.31667	2.84	3.77667	31.7567	3.82667	3.10667	4.84	2.12667	2.56667	3.8	38.2467	2.48667	3.36333	2.71667	2.42667	2.45	3.40333	51.0233	7.7	5.27333	2.86333	2.72	2.95	3.08333	59.8167	2.48	2.53333	4.34667	2.53	2.67	4.01	54.8033	3.34667	3.47	2.84333	2.83	2.38667	3.08667	34.89	3.07	2.56333
398.058	3.39333	2.37333	2.05	3.02667	43.8067	3.65667	2.56	2.96333	2.32333	2.84333	3.78	31.8333	3.81333	3.09667	4.82667	2.11667	2.56333	3.78333	38.3467	2.49333	3.35667	2.72	2.43	2.44333	3.40667	51.0767	7.70333	5.29	2.86	2.72333	2.95	3.07	59.8133	2.46667	2.52667	4.36	2.56333	2.67333	4.02	54.8833	3.38333	3.48667	2.85	2.84667	2.39667	3.09333	34.9467	3.09333	2.58333
398.416	3.39	2.36333	2.04	3.04	43.8133	3.66	2.56	2.94	2.31333	2.83667	3.76333	31.8667	3.81	3.08667	4.82333	2.12	2.55	3.77	38.43	2.49333	3.34333	2.71	2.42667	2.43667	3.40333	51.11	7.70333	5.27667	2.86	2.71	2.94667	3.05333	59.85	2.46667	2.52	4.36333	2.56667	2.68333	4.03667	54.9567	3.38	3.50333	2.86	2.85667	2.40667	3.10667	34.98	3.11333	2.59667
398.774	3.37667	2.36	2.04667	3.03667	43.83	3.64667	2.54667	2.92333	2.3	2.82667	3.76	31.91	3.80667	3.08	4.81333	2.11333	2.54333	3.77333	38.5167	2.48	3.32333	2.7	2.42	2.44	3.42	51.19	7.70667	5.27	2.86	2.70667	2.93333	3.03333	59.92	2.46333	2.50667	4.35667	2.56333	2.67667	4.02667	54.95	3.39333	3.49	2.88	2.85	2.40333	3.12	34.97	3.11333	2.59667
399.132	3.39333	2.38	2.06	3.05	43.84	3.64333	2.56	2.93	2.3	2.83667	3.77667	31.9367	3.82	3.09333	4.81333	2.12	2.55667	3.79	38.52	2.48333	3.33333	2.71667	2.42333	2.44667	3.43	51.1533	7.71333	5.27667	2.86667	2.71	2.93333	3.04	59.9667	2.47333	2.50667	4.35	2.55667	2.68333	4.02333	54.9733	3.38	3.48667	2.85667	2.85667	2.40333	3.12667	34.99	3.10667	2.59333
399.489	3.39	2.38667	2.05333	3.04667	43.8267	3.63333	2.56333	2.93	2.29333	2.83333	3.77333	31.8833	3.80667	3.09667	4.81667	2.11667	2.54333	3.79667	38.5133	2.48667	3.33667	2.71333	2.41333	2.45667	3.44333	51.0933	7.73	5.26333	2.87333	2.71333	2.93	3.04	59.9433	2.46667	2.50333	4.36333	2.58333	2.70333	4.04667	54.9233	3.4	3.50667	2.86667	2.87667	2.42333	3.15	35	3.13	2.61333
399.847	3.39667	2.41667	2.06333	3.06	43.8267	3.64333	2.57667	2.94333	2.3	2.84333	3.79667	31.8733	3.82333	3.12	4.83667	2.12667	2.56	3.83333	38.47	2.49667	3.36667	2.73667	2.42	2.46333	3.46667	51.0633	7.75667	5.27	2.87667	2.73	2.93	3.06667	59.8967	2.48667	2.51667	4.35667	2.57333	2.71667	4.05333	54.8767	3.38	3.50333	2.85667	2.86667	2.41667	3.15333	34.97	3.12667	2.61333
400.205	3.42	2.44	2.07667	3.07	43.8067	3.64667	2.60333	2.95333	2.31667	2.86333	3.82	31.8667	3.84667	3.14333	4.85	2.13333	2.58	3.84667	38.44	2.51333	3.38667	2.76	2.44333	2.48333	3.49667	50.9833	7.77333	5.28667	2.88667	2.75333	2.95	3.1	59.8333	2.49	2.53	4.36667	2.58	2.72333	4.07	54.8067	3.38667	3.51	2.87	2.86667	2.42	3.15667	34.9367	3.12667	2.62333
400.562	3.43333	2.43333	2.07333	3.08333	43.76	3.65	2.61	2.96	2.32333	2.87667	3.81667	31.8633	3.86333	3.14	4.85333	2.14667	2.58333	3.86333	38.4233	2.50667	3.39	2.78	2.45667	2.48667	3.50333	50.8733	7.76333	5.29	2.89	2.77	2.95	3.11667	59.7667	2.48667	2.53	4.38	2.59333	2.73	4.09667	54.8267	3.37667	3.52	2.88	2.88	2.43333	3.17333	34.9633	3.13667	2.64333
400.92	3.44	2.45	2.06333	3.10333	43.77	3.65667	2.61667	2.97333	2.32667	2.89	3.83333	31.8933	3.87667	3.15	4.86667	2.16333	2.59	3.88	38.4367	2.51333	3.39333	2.78	2.46667	2.50667	3.54	50.89	7.77667	5.29	2.89667	2.78667	2.97667	3.12667	59.7	2.5	2.55667	4.38667	2.61	2.73667	4.11667	54.7333	3.39333	3.53	2.9	2.87333	2.43333	3.18667	34.9067	3.16	2.65333
401.277	3.47	2.45667	2.09	3.12333	43.76	3.67333	2.62667	2.99333	2.34667	2.9	3.84667	31.9133	3.91	3.16333	4.89667	2.18	2.62	3.90333	38.4667	2.51667	3.40333	2.79	2.48	2.51333	3.56667	50.87	7.79667	5.30667	2.92	2.79333	2.98	3.14667	59.7267	2.51333	2.58	4.38	2.60333	2.73667	4.12333	54.8	3.38333	3.53667	2.89333	2.88333	2.41667	3.19333	34.8967	3.15333	2.64333
401.635	3.47667	2.44667	2.09667	3.13333	43.6767	3.68	2.61667	2.99667	2.34667	2.91	3.85333	31.8967	3.91	3.15667	4.89667	2.19333	2.61667	3.91	38.5067	2.50667	3.4	2.78667	2.47	2.53	3.57667	50.7733	7.78333	5.31	2.92333	2.79667	2.98	3.14667	59.7	2.51667	2.58	4.38	2.60333	2.72667	4.11667	54.6733	3.37667	3.54667	2.91	2.89333	2.42667	3.2	34.83	3.15667	2.65
401.992	3.47	2.43	2.10333	3.14	43.64	3.65667	2.61333	2.98667	2.33333	2.89333	3.85333	31.8833	3.89	3.14333	4.9	2.2	2.62667	3.92667	38.53	2.49667	3.39333	2.77667	2.47	2.53	3.58333	50.7667	7.78	5.31333	2.92	2.78	2.98333	3.13	59.67	2.50667	2.57333	4.34667	2.59667	2.71333	4.11	54.68	3.36333	3.54	2.90333	2.88	2.40333	3.18333	34.8167	3.14	2.64
402.35	3.48	2.45333	2.11	3.14	43.6233	3.65333	2.61333	3	2.33667	2.9	3.88	31.8933	3.9	3.15333	4.91	2.2	2.65	3.94333	38.5633	2.51667	3.42333	2.79	2.48333	2.54333	3.61	50.7633	7.8	5.33333	2.92667	2.79	3.01	3.12667	59.6933	2.51667	2.6	4.34667	2.6	2.72	4.11667	54.6067	3.37333	3.57	2.90667	2.89333	2.42	3.2	34.7467	3.15333	2.65333
402.707	3.46667	2.43333	2.11	3.11667	43.5133	3.62667	2.59333	2.98	2.33	2.89667	3.86333	31.8633	3.87333	3.13667	4.90333	2.19333	2.64	3.93333	38.5467	2.50667	3.42667	2.78333	2.47667	2.53	3.6	50.72	7.79667	5.33333	2.90667	2.78333	2.98667	3.11667	59.7133	2.51	2.58	4.35	2.59	2.73333	4.11667	54.6567	3.36333	3.58333	2.90333	2.90333	2.41667	3.20333	34.7533	3.17	2.65667
403.064	3.46667	2.44333	2.11667	3.11	43.4967	3.63	2.58667	2.97667	2.32	2.9	3.87	31.88	3.87333	3.13	4.89	2.20333	2.63333	3.93333	38.5667	2.50667	3.42667	2.79	2.49	2.54667	3.60333	50.72	7.79667	5.34	2.90333	2.78	2.99667	3.11667	59.7333	2.50333	2.56667	4.35	2.60333	2.72333	4.11333	54.6333	3.36667	3.59333	2.90333	2.89	2.42333	3.21333	34.7333	3.18	2.66333
403.422	3.45667	2.44333	2.11667	3.10667	43.4867	3.62	2.57333	2.96	2.31	2.88667	3.85667	31.86	3.87667	3.14	4.89667	2.20333	2.63	3.93667	38.5833	2.50667	3.43	2.78	2.49667	2.53667	3.60667	50.7	7.78667	5.32333	2.89667	2.77	3.00667	3.11	59.8	2.49333	2.56	4.36333	2.62333	2.75	4.13667	54.7233	3.37333	3.60333	2.91333	2.89667	2.44	3.23667	34.72	3.20333	2.68
403.779	3.47333	2.45667	2.13333	3.12667	43.47	3.66	2.58333	2.98	2.34667	2.92	3.87	31.86	3.90333	3.16	4.91667	2.22333	2.63667	3.94667	38.65	2.52667	3.43667	2.79333	2.51667	2.56	3.64	50.73	7.80333	5.33	2.91667	2.78667	3.00667	3.13667	59.8667	2.51333	2.57	4.39333	2.65	2.78667	4.15667	54.7067	3.39667	3.64	2.93	2.92	2.47333	3.27667	34.7033	3.24667	2.71
404.136	3.46	2.44333	2.13	3.13667	43.4667	3.66667	2.57	2.97333	2.33	2.90333	3.87	31.8433	3.88	3.16333	4.90667	2.22	2.62667	3.96	38.6667	2.51667	3.43	2.79667	2.51	2.57333	3.63333	50.72	7.82333	5.33	2.91	2.78667	3.00333	3.14333	59.8867	2.50333	2.55667	4.4	2.65	2.78	4.15667	54.73	3.39333	3.63333	2.90667	2.90333	2.45333	3.28	34.7333	3.26	2.70333
404.493	3.47	2.44333	2.14	3.16333	43.49	3.68	2.59333	2.98333	2.35	2.9	3.88333	31.86	3.89667	3.16333	4.89667	2.22667	2.63667	3.97667	38.7467	2.52667	3.43	2.80667	2.52667	2.58667	3.64333	50.76	7.82333	5.34	2.92667	2.79333	3.01667	3.14667	59.8933	2.51	2.58	4.39667	2.66333	2.78333	4.16667	54.7133	3.39	3.63667	2.91	2.9	2.46667	3.28333	34.6933	3.26667	2.70333
404.85	3.46	2.42	2.13333	3.16	43.47	3.66	2.58333	2.96667	2.34	2.89333	3.87667	31.8633	3.88333	3.16	4.88333	2.20667	2.62667	3.98	38.8	2.50667	3.42667	2.8	2.52	2.57667	3.65333	50.7433	7.81	5.32667	2.91333	2.78667	3.00667	3.13667	59.92	2.50333	2.57333	4.40667	2.65667	2.79333	4.17667	54.66	3.4	3.64333	2.91333	2.91	2.47667	3.27	34.65	3.29	2.71667
405.207	3.46333	2.43333	2.13	3.15667	43.44	3.65	2.60333	2.97333	2.34	2.89667	3.88667	31.8667	3.86667	3.15667	4.87	2.20333	2.62667	3.99	38.82	2.50667	3.41667	2.81	2.52667	2.59	3.67	50.7167	7.83	5.34	2.92333	2.8	3.01333	3.13667	59.9333	2.5	2.59	4.4	2.65333	2.79333	4.17333	54.5767	3.4	3.63667	2.91333	2.90333	2.47	3.26667	34.6633	3.29	2.71
405.564	3.46	2.42333	2.10667	3.15	43.3967	3.62	2.58	2.97667	2.31333	2.88	3.88333	31.8233	3.84667	3.14333	4.84667	2.19333	2.61667	4.00333	38.77	2.49	3.42	2.8	2.52333	2.59333	3.67	50.6267	7.83	5.34	2.90333	2.78	3.02667	3.13	59.9033	2.48	2.59	4.39	2.65	2.79	4.18333	54.6167	3.4	3.63667	2.90333	2.9	2.47	3.27333	34.68	3.30333	2.71
405.921	3.46	2.41667	2.09333	3.14333	43.34	3.6	2.57667	2.95333	2.30333	2.87667	3.87667	31.79	3.84667	3.12333	4.84333	2.18667	2.61333	3.99333	38.7667	2.48667	3.39667	2.79667	2.51667	2.58333	3.68333	50.6	7.80333	5.32667	2.89	2.76667	3.02	3.12	59.9	2.46	2.59	4.38333	2.67	2.80667	4.18667	54.61	3.40333	3.64	2.92	2.9	2.47333	3.27667	34.64	3.30333	2.72333
406.278	3.48333	2.43333	2.11667	3.16667	43.28	3.61	2.59333	2.99667	2.31667	2.9	3.89333	31.7733	3.87667	3.15	4.87667	2.21333	2.63	4.02667	38.81	2.5	3.42	2.82333	2.54667	2.61667	3.73333	50.5133	7.83333	5.34667	2.91	2.78667	3.05	3.14333	59.9367	2.47667	2.6	4.37667	2.67333	2.80667	4.19667	54.6467	3.40333	3.64667	2.93	2.91333	2.46667	3.27667	34.7	3.32	2.73333
406.635	3.5	2.46	2.12	3.18333	43.25	3.61667	2.61	3.01333	2.33667	2.9	3.91	31.7633	3.88667	3.16	4.88	2.24	2.65667	4.05	38.85	2.51	3.44333	2.84333	2.56333	2.63333	3.75333	50.5	7.87333	5.35667	2.93	2.80333	3.07667	3.15667	59.9533	2.49667	2.61333	4.36667	2.68333	2.79667	4.2	54.6367	3.39333	3.64333	2.92667	2.91	2.46333	3.29	34.6867	3.32	2.74333
406.992	3.50667	2.47	2.12333	3.22	43.28	3.64	2.62333	3.02	2.35333	2.92333	3.91	31.7467	3.91	3.18667	4.89	2.24667	2.67	4.07667	38.9067	2.52	3.46667	2.87	2.58333	2.65333	3.79333	50.5167	7.9	5.36333	2.94	2.81333	3.08333	3.18333	60.0067	2.52	2.62333	4.37333	2.69	2.79	4.21	54.64	3.40667	3.65	2.91667	2.92333	2.47333	3.3	34.6667	3.32667	2.76
407.349	3.52	2.49	2.15333	3.23	43.27	3.64	2.64	3.00667	2.37333	2.93333	3.91667	31.79	3.93667	3.21	4.90667	2.25667	2.67667	4.08667	38.9667	2.53667	3.46667	2.89667	2.60333	2.66667	3.82	50.4967	7.91	5.36667	2.95	2.84	3.08667	3.19667	60	2.52667	2.63	4.38	2.69667	2.78667	4.22	54.6067	3.4	3.64333	2.92667	2.93667	2.46333	3.29667	34.67	3.33333	2.76667
407.706	3.55	2.51333	2.18	3.26	43.2833	3.67667	2.66333	3.04333	2.4	2.95	3.94	31.82	3.96667	3.25	4.93333	2.28333	2.71	4.10333	39.0867	2.54333	3.5	2.92667	2.63667	2.69	3.84667	50.5367	7.95333	5.39	2.99	2.87	3.11333	3.22	60.0433	2.57	2.65667	4.40333	2.70333	2.81	4.24667	54.6067	3.41	3.68667	2.93667	2.96333	2.48667	3.33333	34.7233	3.35	2.78
408.062	3.52667	2.5	2.15333	3.25	43.2933	3.65667	2.64333	3.01	2.38	2.94667	3.93	31.8567	3.95	3.23333	4.91667	2.26667	2.70667	4.09333	39.1667	2.53333	3.48	2.91667	2.62	2.67667	3.85333	50.57	7.95333	5.38333	2.97	2.86667	3.09333	3.22333	60.02	2.54333	2.64667	4.42667	2.71	2.81667	4.27333	54.53	3.42333	3.71	2.95333	2.95667	2.51	3.35333	34.6833	3.36667	2.79667
408.419	3.53	2.51	2.14667	3.24667	43.2933	3.65667	2.63	3.01	2.38	2.94333	3.93667	31.8433	3.95667	3.24	4.92	2.25667	2.70667	4.09	39.2433	2.54333	3.47333	2.92333	2.62667	2.67	3.85667	50.5567	7.95667	5.39	2.96667	2.85667	3.10333	3.23667	60	2.53333	2.62667	4.46333	2.73	2.84667	4.29	54.5233	3.43667	3.73667	2.96667	2.99333	2.53667	3.39333	34.7267	3.39667	2.81
408.776	3.54	2.5	2.14	3.23333	43.24	3.62333	2.60333	3	2.36	2.93333	3.92333	31.8933	3.95	3.22667	4.91333	2.24333	2.70333	4.08667	39.3133	2.54333	3.45667	2.91667	2.61667	2.65667	3.85	50.5433	7.94333	5.37333	2.95333	2.84	3.09	3.22333	59.96	2.50667	2.61667	4.46333	2.73333	2.85333	4.30333	54.57	3.44667	3.77	2.97667	2.99333	2.53333	3.39667	34.8	3.41	2.80667
409.132	3.53	2.49667	2.14667	3.24	43.24	3.62667	2.60667	3.00667	2.35667	2.92333	3.92667	31.94	3.95667	3.21667	4.91	2.25667	2.71667	4.1	39.43	2.53	3.47333	2.90667	2.64333	2.66	3.87	50.6667	7.96333	5.39	2.96667	2.85667	3.09333	3.22667	60.0333	2.51667	2.61333	4.47	2.73333	2.86333	4.30667	54.5867	3.46	3.77667	2.97667	2.99667	2.53667	3.39667	34.81	3.41333	2.82333
409.489	3.52	2.49667	2.14333	3.24667	43.21	3.62	2.6	3.01	2.36	2.92667	3.92667	31.9467	3.95333	3.20667	4.9	2.25	2.71	4.11333	39.48	2.53333	3.48	2.90667	2.65667	2.66333	3.89333	50.6033	7.97667	5.40333	2.96333	2.85333	3.09333	3.23333	59.98	2.51333	2.62	4.47667	2.74333	2.86	4.31667	54.5933	3.47	3.78333	2.98	3.00667	2.53667	3.39	34.82	3.42333	2.84333
409.846	3.54333	2.51333	2.15667	3.26333	43.25	3.64	2.61	3.02333	2.38	2.93	3.95333	31.9567	3.98667	3.22333	4.91667	2.27667	2.72667	4.14667	39.5367	2.55	3.50667	2.93333	2.69	2.69333	3.91333	50.62	7.99667	5.41	3	2.87667	3.12333	3.24333	60.0167	2.52667	2.64333	4.45333	2.73	2.85	4.29	54.5667	3.45333	3.78	2.95667	2.99333	2.52667	3.38333	34.8367	3.42	2.83
410.202	3.55667	2.53333	2.18667	3.28667	43.1167	3.66333	2.62667	3.02667	2.39	2.94667	3.97	31.9233	4	3.22667	4.93333	2.30667	2.75333	4.18667	39.4833	2.57	3.51	2.94	2.71333	2.72667	3.95667	50.51	8	5.43	3.03	2.90667	3.12667	3.25	59.9	2.53667	2.67	4.43333	2.71	2.82	4.27333	54.5967	3.45	3.77	2.95333	2.98333	2.50333	3.36667	34.83	3.39667	2.82667
410.558	3.56	2.53667	2.18333	3.30333	43.0833	3.67667	2.63333	3.02333	2.40667	2.94667	3.98	31.9033	4.01333	3.22333	4.94667	2.32333	2.75667	4.19667	39.5133	2.56667	3.52333	2.95333	2.73	2.75	3.99	50.5167	8.01333	5.45667	3.02667	2.91667	3.12667	3.26	59.8867	2.55333	2.68	4.46667	2.73667	2.83667	4.3	54.59	3.45667	3.78	2.97667	3.00667	2.52667	3.39	34.8133	3.42667	2.85333
410.915	3.55	2.51667	2.14333	3.29333	43.0233	3.65667	2.61	3.01	2.38667	2.92	3.95667	31.8533	3.98667	3.2	4.92	2.30333	2.73333	4.17667	39.47	2.55	3.51	2.95667	2.69667	2.73667	3.98	50.39	7.99333	5.42333	3.01333	2.89333	3.10333	3.24667	59.81	2.53	2.66667	4.47333	2.75	2.85333	4.32667	54.5667	3.47333	3.81667	3.00333	3.02333	2.54333	3.41333	34.8133	3.46333	2.86333
411.271	3.56333	2.51	2.13667	3.28667	42.9933	3.64333	2.59333	2.99667	2.37	2.91667	3.95667	31.8433	3.99	3.2	4.92	2.3	2.73333	4.18667	39.49	2.54	3.50667	2.95667	2.70333	2.73667	3.98667	50.4033	8.00667	5.40333	3.02667	2.88	3.1	3.23667	59.7733	2.51667	2.65	4.48333	2.74667	2.85667	4.32667	54.61	3.48	3.82333	3.01667	3.02667	2.55333	3.43	34.8433	3.47333	2.86667
411.628	3.56667	2.51	2.12333	3.29667	42.9133	3.62	2.58	2.99333	2.36	2.90667	3.94667	31.8467	3.96667	3.18667	4.91	2.28333	2.73	4.17667	39.47	2.52333	3.5	2.95333	2.69	2.72	3.99667	50.3967	8.01	5.39	3	2.86333	3.08667	3.24	59.6867	2.51	2.64	4.50667	2.79667	2.88667	4.36333	54.6467	3.50333	3.85333	3.04667	3.06333	2.57333	3.45667	34.8367	3.5	2.89667
411.984	3.55667	2.5	2.10667	3.29667	42.97	3.60667	2.56333	2.98667	2.33333	2.89333	3.95333	31.9067	3.94667	3.18667	4.90667	2.27	2.73	4.17333	39.5533	2.52	3.51333	2.95667	2.69667	2.71333	4.00333	50.5167	8.03333	5.38	2.98667	2.86333	3.07667	3.23333	59.73	2.50667	2.63	4.52667	2.82	2.91	4.39333	54.63	3.51667	3.87667	3.07	3.07667	2.61	3.47	34.8567	3.53667	2.92667
412.34	3.57333	2.51	2.12	3.33	42.9633	3.61333	2.56333	3.01	2.33333	2.89667	3.97667	31.9633	3.96333	3.19667	4.9	2.28667	2.74667	4.19	39.6333	2.52333	3.52	2.96667	2.70667	2.72	4.01667	50.5233	8.06333	5.39	3.02333	2.87333	3.09	3.25333	59.7	2.52	2.63667	4.52333	2.82	2.90667	4.41	54.61	3.53333	3.88667	3.07667	3.09333	2.61667	3.48333	34.8767	3.54333	2.94667
412.696	3.59333	2.51667	2.15	3.35333	42.9567	3.62667	2.58	3.03333	2.38	2.93	4.01333	32.0267	3.98333	3.23	4.94667	2.32	2.77	4.23667	39.7333	2.55333	3.55	2.99667	2.74333	2.76	4.05667	50.5567	8.09333	5.45	3.05667	2.89	3.11667	3.29	59.6867	2.54	2.66	4.53667	2.83667	2.92	4.41	54.5933	3.53333	3.9	3.09333	3.10667	2.64	3.49333	34.8967	3.57	2.95
413.053	3.59667	2.53667	2.16333	3.38	42.9467	3.63333	2.59	3.04333	2.38	2.91333	4.02667	32.1	3.99	3.24333	4.95333	2.33333	2.77667	4.25	39.7933	2.56333	3.57333	3.01667	2.74667	2.78	4.07667	50.6133	8.09333	5.45667	3.05667	2.90333	3.12	3.30667	59.7067	2.55	2.67	4.52	2.83333	2.91667	4.40667	54.5667	3.53333	3.89667	3.08333	3.11667	2.63	3.49333	34.8667	3.57	2.94333
413.409	3.60667	2.54333	2.18	3.39333	42.9433	3.66	2.59667	3.05333	2.4	2.94	4.04	32.09	4.00333	3.26333	4.97	2.35667	2.81	4.28	39.8967	2.58	3.58	3.03667	2.77667	2.81	4.11667	50.5667	8.11333	5.48333	3.09667	2.92	3.14333	3.32667	59.6867	2.56	2.69333	4.51	2.81333	2.90667	4.39333	54.5167	3.53	3.90333	3.06	3.11	2.62667	3.48	34.88	3.58	2.94
413.765	3.61667	2.55333	2.19333	3.41	42.8967	3.66333	2.61333	3.07	2.42667	2.94333	4.04667	32.0833	4.03	3.26333	4.97333	2.36667	2.82333	4.30333	39.93	2.59333	3.59333	3.05667	2.79667	2.83667	4.14	50.5233	8.12333	5.49667	3.10667	2.93	3.16667	3.35333	59.5867	2.56333	2.70333	4.51333	2.82333	2.93333	4.40667	54.59	3.52667	3.92667	3.06667	3.11	2.61667	3.49667	34.9333	3.58667	2.94667
414.121	3.62333	2.57	2.20333	3.41	42.8767	3.67	2.62667	3.07333	2.44333	2.94333	4.05	32.0433	4.04667	3.27667	5.00333	2.38667	2.85	4.33	39.9167	2.60667	3.60667	3.07333	2.81667	2.85667	4.16667	50.5067	8.12333	5.49333	3.10667	2.94	3.19667	3.36333	59.48	2.56333	2.72	4.51333	2.83	2.93333	4.39667	54.5833	3.52333	3.93333	3.06333	3.09667	2.61333	3.50667	34.92	3.59333	2.93333
414.477	3.65	2.62333	2.22333	3.42667	42.84	3.69	2.64667	3.09	2.46	2.95667	4.06667	32.03	4.06	3.29	5.01	2.40667	2.89	4.36	39.9567	2.62	3.61333	3.09333	2.84	2.88667	4.20667	50.49	8.17	5.48667	3.12	2.96333	3.22667	3.38	59.4333	2.57333	2.73333	4.51333	2.82	2.91333	4.39667	54.6133	3.51333	3.93333	3.05333	3.08	2.59667	3.51	34.9233	3.57333	2.94
414.833	3.67333	2.61333	2.23667	3.44333	42.8133	3.70333	2.65667	3.09	2.48	2.98	4.07	31.98	4.07667	3.3	5.03	2.43	2.91	4.38	39.9833	2.62333	3.61667	3.11	2.86	2.90333	4.22333	50.4133	8.17667	5.51667	3.13333	2.98	3.24667	3.39667	59.35	2.58333	2.73667	4.51667	2.84333	2.91	4.41667	54.56	3.5	3.96	3.06667	3.09	2.62	3.53333	34.9733	3.58333	2.95
415.189	3.67	2.62	2.22667	3.43333	42.7567	3.69	2.64667	3.08667	2.47333	2.96667	4.07667	31.97	4.07667	3.29	5.04	2.42	2.89667	4.37667	39.9467	2.61	3.61667	3.11667	2.85	2.90667	4.21667	50.3933	8.17667	5.51333	3.12	2.98	3.23667	3.38	59.2633	2.58667	2.72667	4.55333	2.88	2.93333	4.45	54.5633	3.51667	3.98667	3.11	3.13333	2.64333	3.58333	34.9833	3.59	2.97667
415.545	3.67333	2.62	2.22667	3.43333	42.7233	3.68667	2.63667	3.10333	2.46667	2.97	4.08333	31.9333	4.07	3.29667	5.02667	2.43667	2.89	4.37667	39.96	2.60667	3.61	3.13333	2.85	2.90667	4.23667	50.3167	8.15667	5.50667	3.12333	2.98333	3.23	3.37667	59.2	2.58667	2.72333	4.55333	2.88667	2.93333	4.47	54.46	3.53333	3.99667	3.12	3.15667	2.63	3.57667	34.94	3.59333	2.97667
415.901	3.68667	2.61667	2.24	3.45333	42.73	3.68667	2.65	3.11333	2.45667	2.98	4.1	31.9833	4.06	3.29667	5.02	2.43333	2.88667	4.39333	40.0067	2.61333	3.63	3.14333	2.85667	2.92333	4.26	50.29	8.18333	5.50667	3.13	2.99667	3.22333	3.37667	59.1733	2.60333	2.72333	4.56	2.89333	2.96	4.47667	54.43	3.55667	4.02333	3.13	3.17667	2.64	3.58667	34.9567	3.61	3.00667
416.256	3.69333	2.62	2.24333	3.47333	42.6967	3.70333	2.65333	3.11667	2.43333	2.98333	4.10667	32.0067	4.08	3.29333	5.02	2.43333	2.88667	4.40333	39.9833	2.60667	3.65	3.16	2.87	2.92333	4.27333	50.25	8.18667	5.49667	3.14667	3.00333	3.22333	3.37333	59.12	2.59667	2.73	4.56333	2.89	2.96667	4.48333	54.31	3.54333	4.03333	3.13	3.18333	2.64333	3.6	34.95	3.61667	3.01333
416.612	3.68	2.63333	2.23667	3.46	42.6733	3.68667	2.62333	3.11333	2.42333	2.99	4.12	32.03	4.07333	3.28333	5	2.42333	2.89333	4.4	40.0067	2.60333	3.63667	3.15333	2.87333	2.93667	4.29333	50.2433	8.19667	5.49	3.15333	2.99333	3.22	3.37667	59.06	2.59	2.73	4.58333	2.89333	3.00333	4.52	54.3267	3.57333	4.05	3.14333	3.20667	2.65667	3.61333	34.9633	3.64667	3.04
416.968	3.68333	2.64333	2.24667	3.48333	42.62	3.69333	2.63	3.11333	2.41	2.99667	4.12667	32.0367	4.08	3.29333	4.99333	2.43667	2.91333	4.42667	40.0433	2.62	3.64333	3.15	2.88667	2.94	4.31	50.2033	8.20667	5.49	3.16	2.99	3.23333	3.4	59.0167	2.59	2.74	4.58	2.90667	3.01333	4.53	54.36	3.56667	4.06667	3.13	3.20667	2.66	3.61333	35.0067	3.66667	3.05333
417.324	3.69333	2.64333	2.23333	3.47333	42.6033	3.67333	2.63333	3.09333	2.39333	2.99	4.12333	32.0933	4.08667	3.28333	4.99333	2.43667	2.93	4.43333	40.09	2.60667	3.64333	3.14333	2.88667	2.95333	4.30333	50.2233	8.20333	5.48667	3.16667	2.97	3.24333	3.39333	59.0233	2.58	2.72667	4.59667	2.91	3.01	4.53	54.33	3.55667	4.08	3.13	3.21	2.69	3.64333	35.01	3.68	3.08333
417.679	3.68667	2.64	2.21333	3.47333	42.5033	3.65667	2.60333	3.08	2.39333	2.97	4.10667	32.07	4.08333	3.27667	4.98333	2.44333	2.93	4.43333	40.0767	2.59	3.61667	3.14667	2.89	2.94667	4.30667	50.13	8.19333	5.48667	3.16333	2.95667	3.24	3.38	58.97	2.56333	2.72667	4.58667	2.92	2.99333	4.54	54.35	3.54333	4.08333	3.13333	3.20667	2.69333	3.65667	35.04	3.68333	3.08333
418.035	3.67	2.62333	2.2	3.46333	42.4767	3.63333	2.57	3.06333	2.38667	2.95667	4.09667	32.0567	4.07	3.26333	4.98	2.43333	2.93667	4.43667	40.1067	2.58333	3.61	3.11667	2.87667	2.94333	4.3	50.1133	8.16667	5.48333	3.14667	2.92667	3.22333	3.36667	58.9267	2.54667	2.71	4.6	2.95333	3.01333	4.55667	54.39	3.56333	4.10333	3.15667	3.23	2.71333	3.68333	35.0533	3.71333	3.10667
418.391	3.68	2.61	2.21	3.46333	42.4367	3.62667	2.59	3.06	2.39333	2.93333	4.09333	32.05	4.06333	3.26	4.99	2.45	2.94	4.46333	40.13	2.59333	3.61667	3.14	2.89	2.94667	4.31667	50.09	8.15	5.46667	3.14333	2.93667	3.22	3.37333	58.9	2.55	2.72333	4.6	2.97	3.01333	4.55667	54.3467	3.56333	4.12333	3.17667	3.24	2.73667	3.7	35.04	3.72	3.13
418.746	3.67333	2.6	2.19667	3.46	42.39	3.61333	2.57667	3.06667	2.39333	2.93	4.09333	32.0167	4.05333	3.26333	5.00333	2.45	2.94667	4.46667	40.1367	2.58333	3.62667	3.14667	2.89333	2.96	4.33	50.07	8.14	5.45667	3.14	2.94333	3.23667	3.36667	58.8267	2.54333	2.70667	4.60333	2.97333	3.03667	4.57667	54.3033	3.56	4.14	3.2	3.25333	2.74	3.71	35.0033	3.73667	3.15667
419.102	3.68667	2.61333	2.21667	3.48667	42.37	3.63	2.58333	3.08	2.41	2.94667	4.11	31.9867	4.05667	3.27333	5.03	2.46333	2.95667	4.5	40.16	2.59	3.64	3.17333	2.92	2.99	4.36333	50.08	8.18	5.47333	3.16667	2.97667	3.23333	3.39667	58.8	2.55667	2.73333	4.58	2.97667	3.03	4.58	54.2933	3.54667	4.13	3.19667	3.24333	2.72333	3.69667	34.9933	3.75333	3.14
419.457	3.70333	2.62	2.22667	3.5	42.4067	3.63	2.58333	3.1	2.42	2.95667	4.12667	32.0033	4.04	3.27	5.03667	2.47667	2.98667	4.52667	40.1933	2.6	3.66667	3.18	2.94	2.99667	4.38333	50.1033	8.18667	5.48	3.18	3	3.24667	3.42333	58.7733	2.56	2.72667	4.58333	2.98333	3.04333	4.57333	54.2733	3.55333	4.12333	3.20667	3.27	2.74	3.70333	34.9267	3.75333	3.15
419.812	3.72	2.64667	2.25333	3.54	42.3767	3.64	2.61667	3.13	2.44333	2.97333	4.15667	32	4.05667	3.29667	5.05333	2.51333	3.00667	4.56	40.22	2.63333	3.68333	3.22333	2.97	3.02333	4.42	50.0667	8.20667	5.50667	3.19667	3.04	3.29	3.46333	58.79	2.59333	2.74667	4.59333	2.99	3.03333	4.59	54.2433	3.54333	4.13333	3.19667	3.26667	2.74	3.70667	34.91	3.75333	3.15
420.168	3.73	2.65667	2.25667	3.55667	42.36	3.64667	2.61333	3.13667	2.45333	2.99333	4.15667	32.0033	4.06667	3.31667	5.06	2.50667	3.02333	4.58	40.22	2.63	3.68667	3.24333	2.98	3.03667	4.42667	50.03	8.22667	5.51	3.2	3.06667	3.31333	3.46667	58.76	2.59333	2.73	4.6	2.99333	3.04	4.59	54.2667	3.53667	4.13333	3.18667	3.26333	2.72	3.70333	34.9167	3.76333	3.15
420.523	3.76	2.68667	2.28667	3.57667	42.3967	3.66333	2.63667	3.14667	2.48333	3.01667	4.19	32.0333	4.1	3.31333	5.07	2.53667	3.03667	4.61333	40.2967	2.64667	3.7	3.27333	3.02	3.07	4.45	50.04	8.22667	5.53	3.23	3.09667	3.32667	3.5	58.8433	2.60667	2.75	4.59333	2.98667	3.02333	4.58667	54.2633	3.52667	4.13	3.18	3.25333	2.73	3.70667	34.89	3.75333	3.13333
420.878	3.74333	2.68	2.28333	3.58667	42.35	3.64333	2.62	3.13333	2.47	3.02	4.17333	31.9967	4.09	3.31	5.03667	2.52	3.02667	4.63	40.2933	2.64333	3.68667	3.25333	3.00667	3.06333	4.46	49.9267	8.19	5.51	3.21667	3.09667	3.33667	3.47667	58.7867	2.59333	2.73333	4.60667	3.01	3.05	4.60333	54.2333	3.54	4.16667	3.19667	3.27667	2.76	3.73667	34.8967	3.76667	3.15667
421.234	3.74333	2.69333	2.31333	3.61	42.29	3.64	2.64	3.13333	2.47333	3.04667	4.20333	31.9967	4.11	3.33333	5.06	2.52667	3.02667	4.63667	40.3533	2.64667	3.69	3.27667	3.01333	3.1	4.48333	49.9433	8.21667	5.53	3.23333	3.11	3.35667	3.48333	58.8267	2.59667	2.75667	4.63	3.02667	3.05667	4.63	54.1933	3.54333	4.19667	3.20333	3.28667	2.76	3.75	34.87	3.79333	3.17333
421.589	3.74333	2.66667	2.29333	3.58	42.2767	3.61	2.61667	3.11667	2.45	3.02333	4.2	31.9533	4.09	3.31667	5.04333	2.51	3.00333	4.63333	40.3833	2.62	3.67	3.26667	2.99667	3.09333	4.47333	49.9433	8.17667	5.51	3.24333	3.09667	3.33667	3.46333	58.8233	2.57667	2.74333	4.62333	3.02	3.07333	4.61667	54.1967	3.54	4.21333	3.21333	3.3	2.76	3.75	34.81	3.79333	3.18333
421.944	3.74333	2.66	2.28667	3.58	42.2733	3.59333	2.60333	3.11333	2.44667	3.02667	4.20333	31.9067	4.07667	3.3	5.04	2.52	3	4.64667	40.4033	2.60333	3.66	3.26333	2.98333	3.09333	4.48333	49.9233	8.16667	5.48333	3.24	3.08667	3.33	3.45333	58.8667	2.56667	2.73333	4.62667	3.04333	3.07667	4.63333	54.0967	3.54333	4.23333	3.22333	3.31	2.78333	3.76333	34.7633	3.79667	3.21
422.299	3.75333	2.65333	2.28	3.57667	42.2267	3.57333	2.59	3.11333	2.43333	3.01667	4.17667	31.8367	4.06	3.27667	5.04	2.52	3.01	4.65333	40.3567	2.58333	3.65	3.27	2.97333	3.08333	4.49	49.9033	8.17	5.46	3.22	3.07333	3.32	3.45667	58.8433	2.56	2.74	4.61	3.04333	3.08	4.63667	54.08	3.53	4.22333	3.22333	3.31	2.79	3.76	34.71	3.81667	3.22
422.654	3.77333	2.67667	2.28667	3.59333	42.2233	3.58	2.60333	3.12333	2.44333	3.01333	4.2	31.85	4.08	3.28667	5.06667	2.56	3.03667	4.67	40.37	2.59333	3.65667	3.29	2.98333	3.11333	4.52333	49.92	8.19	5.46	3.23333	3.09333	3.34333	3.48	58.9333	2.57667	2.76333	4.63333	3.04333	3.09667	4.64	54.0833	3.54667	4.21333	3.23667	3.31	2.80333	3.77	34.65	3.84667	3.23
423.009	3.77	2.67667	2.26667	3.56667	42.21	3.57	2.57667	3.13	2.43333	2.99667	4.18333	31.7767	4.07	3.27333	5.06	2.54667	3.04333	4.67667	40.2933	2.59667	3.64667	3.28667	2.98	3.10333	4.52333	49.8033	8.15	5.43	3.22333	3.08333	3.33667	3.47333	58.9733	2.56333	2.75667	4.64	3.05333	3.10333	4.66667	54.04	3.57333	4.22	3.24667	3.32333	2.81667	3.78667	34.6267	3.86667	3.24667
423.364	3.78	2.69333	2.27	3.58667	42.21	3.57333	2.58	3.14	2.42	3.01667	4.17667	31.7567	4.07667	3.28333	5.06333	2.56333	3.06	4.70333	40.2433	2.6	3.63667	3.29333	3	3.12333	4.55333	49.7633	8.16667	5.42333	3.21	3.09333	3.36	3.49	58.9867	2.56	2.77333	4.63667	3.06	3.09667	4.68667	53.99	3.56667	4.21333	3.25	3.32	2.83333	3.79333	34.57	3.87333	3.25667
423.719	3.8	2.72667	2.29	3.61667	42.1767	3.58667	2.6	3.16333	2.44	3.03	4.21	31.7567	4.1	3.3	5.09	2.58333	3.09667	4.73333	40.22	2.62	3.67667	3.32	3.04	3.15	4.61333	49.7667	8.18333	5.46333	3.24333	3.13667	3.40667	3.54667	59.0333	2.58	2.81	4.66	3.06	3.13	4.7	54	3.58667	4.21333	3.25667	3.33	2.84	3.82333	34.5133	3.89667	3.26667
424.074	3.79333	2.74333	2.30667	3.62667	42.1667	3.58333	2.61667	3.16667	2.44667	3.04	4.24	31.7733	4.11	3.33	5.10667	2.6	3.12	4.76667	40.2133	2.63667	3.69667	3.33667	3.04667	3.18333	4.64	49.7667	8.19333	5.47333	3.26	3.16333	3.44	3.55667	59.1233	2.58667	2.81667	4.7	3.08	3.14667	4.72	53.97	3.59667	4.24	3.28667	3.35667	2.84667	3.83	34.5267	3.89667	3.29
424.429	3.83	2.76333	2.32	3.65667	42.1567	3.60667	2.63	3.18333	2.46667	3.06333	4.26333	31.74	4.13	3.33667	5.13667	2.62	3.14	4.8	40.23	2.63667	3.71333	3.36333	3.07333	3.21	4.65667	49.8067	8.20667	5.51	3.27667	3.19333	3.45	3.57667	59.1667	2.60667	2.83	4.69	3.08333	3.14667	4.73667	53.9433	3.57	4.25	3.27667	3.36333	2.84667	3.83333	34.4767	3.88667	3.29
424.784	3.85333	2.76	2.32667	3.66333	42.1033	3.60667	2.64333	3.17667	2.47667	3.07	4.27	31.6967	4.13667	3.33667	5.14667	2.63333	3.15	4.80667	40.1967	2.62667	3.70333	3.37	3.08333	3.22333	4.68	49.82	8.2	5.49333	3.27667	3.19667	3.47	3.59	59.1633	2.60667	2.82667	4.68	3.08667	3.15333	4.74333	53.9567	3.56	4.26333	3.28	3.37	2.85333	3.83667	34.4433	3.90333	3.30333
425.139	3.86333	2.75	2.33	3.67	42.0367	3.59333	2.63	3.17	2.49	3.08333	4.26	31.6833	4.12667	3.32	5.15667	2.63	3.16	4.81667	40.2167	2.61	3.70667	3.37	3.09	3.24	4.67333	49.8667	8.19333	5.48667	3.27667	3.20333	3.47	3.58333	59.2433	2.59333	2.83	4.71667	3.12	3.19	4.77	53.9933	3.58	4.29	3.29333	3.39333	2.87333	3.86667	34.4633	3.94	3.34333
425.494	3.87667	2.76667	2.34667	3.66667	41.9533	3.59667	2.63	3.18333	2.49667	3.08	4.26	31.6167	4.12667	3.32333	5.16667	2.63667	3.15	4.83333	40.18	2.61333	3.69	3.37667	3.07333	3.26	4.66667	49.7733	8.19667	5.46333	3.28333	3.2	3.46667	3.56333	59.23	2.60333	2.83667	4.68667	3.12333	3.18	4.77333	53.9933	3.57	4.3	3.30667	3.41	2.88	3.86333	34.3967	3.95667	3.35
425.848	3.88333	2.75667	2.34333	3.65667	41.9333	3.60667	2.60667	3.18667	2.50667	3.08333	4.25	31.58	4.12	3.32	5.14667	2.64667	3.16	4.85667	40.2	2.59	3.67667	3.37667	3.07667	3.25333	4.67667	49.7033	8.19333	5.45667	3.29333	3.2	3.47	3.56333	59.25	2.59667	2.84333	4.68667	3.15	3.2	4.81	53.9533	3.57667	4.32333	3.29667	3.42333	2.90667	3.89667	34.2933	4	3.37333
426.203	3.87667	2.75	2.35333	3.63333	41.8967	3.58667	2.59333	3.17667	2.48667	3.08	4.24333	31.5333	4.09667	3.32333	5.14667	2.63667	3.15667	4.85333	40.16	2.57333	3.67667	3.37	3.08	3.25333	4.7	49.65	8.19333	5.42667	3.3	3.19667	3.48	3.56	59.3033	2.58333	2.84667	4.69667	3.18	3.21	4.83333	53.9367	3.59667	4.33333	3.33	3.44667	2.93333	3.90667	34.2467	4.03	3.39
426.558	3.88333	2.75333	2.35667	3.64667	41.8767	3.60333	2.6	3.18333	2.50667	3.1	4.25	31.5033	4.09333	3.34667	5.15	2.64667	3.17333	4.89667	40.1767	2.59	3.68	3.39333	3.09667	3.26333	4.71667	49.6033	8.22	5.44667	3.32	3.22	3.5	3.56667	59.3867	2.60333	2.86333	4.71333	3.19667	3.24333	4.84667	53.93	3.58667	4.36333	3.32667	3.45	2.95	3.91	34.2233	4.04	3.40333
426.912	3.91333	2.80667	2.4	3.68333	41.8967	3.65	2.64333	3.22	2.53333	3.12667	4.29667	31.5167	4.12667	3.37667	5.18667	2.68333	3.2	4.94333	40.19	2.62667	3.71667	3.43667	3.14	3.29333	4.76667	49.5433	8.26667	5.48667	3.36333	3.26333	3.53	3.61667	59.51	2.65	2.89	4.7	3.20667	3.26333	4.86333	53.8633	3.60667	4.36	3.36	3.46333	2.96333	3.91667	34.1367	4.06333	3.40667
427.267	3.92333	2.8	2.40667	3.71333	41.94	3.66	2.64	3.21333	2.52667	3.13333	4.29333	31.55	4.12667	3.36333	5.2	2.7	3.23667	4.93667	40.24	2.62	3.73333	3.45333	3.15667	3.30333	4.78	49.58	8.26333	5.49667	3.35333	3.27667	3.54333	3.63	59.7233	2.63667	2.90333	4.69667	3.22	3.27	4.85	53.8533	3.59333	4.35333	3.36	3.46	2.97667	3.92333	34.15	4.05667	3.40333
427.621	3.92667	2.79667	2.40333	3.74333	41.8667	3.65667	2.64	3.23	2.51667	3.13333	4.3	31.5233	4.1	3.37333	5.22	2.68667	3.22	4.92333	40.1733	2.62333	3.73333	3.45333	3.15	3.31667	4.79667	49.5467	8.26	5.48	3.33667	3.26333	3.55	3.63667	59.7733	2.63	2.89667	4.69	3.21333	3.26667	4.85	53.8567	3.61	4.34	3.37667	3.46333	2.97333	3.92667	34.1133	4.03667	3.4
427.976	3.94	2.81667	2.41	3.76333	41.8333	3.66333	2.64333	3.26	2.53667	3.14667	4.32333	31.5367	4.12	3.38	5.23333	2.71667	3.24667	4.96667	40.1333	2.64	3.74667	3.48	3.16333	3.34	4.8	49.5067	8.27333	5.5	3.34333	3.28667	3.56	3.66667	59.8733	2.64667	2.91667	4.70667	3.22333	3.31333	4.88333	53.88	3.63	4.36333	3.40667	3.47	2.99667	3.95	34.11	4.06667	3.45
428.33	3.95667	2.84667	2.43667	3.78	41.8733	3.67333	2.63667	3.27	2.53667	3.14667	4.33667	31.57	4.13333	3.37333	5.25333	2.74	3.27667	4.99333	40.1567	2.63	3.75667	3.5	3.19	3.37667	4.8	49.5467	8.26667	5.49333	3.36333	3.28667	3.57	3.68667	60.02	2.63667	2.93333	4.73333	3.25667	3.34333	4.91333	53.8033	3.65333	4.38	3.46	3.51	3.02333	3.99333	34.0467	4.10333	3.49
428.685	3.95	2.83667	2.43	3.76333	41.8667	3.65	2.61667	3.26333	2.54667	3.13333	4.34	31.4833	4.11667	3.35667	5.26	2.75	3.29333	4.99333	40.1267	2.61667	3.75333	3.49333	3.19333	3.40667	4.81667	49.5467	8.25333	5.48333	3.35667	3.29667	3.58667	3.69333	60.0533	2.61667	2.93333	4.74333	3.27667	3.34667	4.93	53.8267	3.64	4.39333	3.47	3.52667	3.02333	4.00333	34	4.13	3.49
429.039	3.95	2.84333	2.42667	3.76	41.7767	3.63	2.61333	3.25667	2.55667	3.14	4.35667	31.37	4.10333	3.37	5.24333	2.74	3.28667	5.01667	40.0733	2.61333	3.73667	3.5	3.19333	3.43333	4.81667	49.44	8.23	5.48333	3.36667	3.31333	3.60667	3.70667	59.9367	2.62	2.92667	4.77	3.29667	3.36	4.96667	53.8367	3.66333	4.40333	3.47667	3.55	3.03	4.00333	33.9467	4.15333	3.52667
429.393	3.97333	2.86	2.45333	3.77333	41.7967	3.61667	2.62333	3.25667	2.57333	3.15	4.37333	31.3533	4.11667	3.36667	5.24	2.75667	3.32667	5.06	40.1567	2.61667	3.74	3.53667	3.22333	3.46333	4.85	49.47	8.23333	5.48667	3.39	3.34	3.62333	3.71667	60.1	2.62667	2.94333	4.78333	3.33333	3.40333	4.97	53.8167	3.66667	4.40333	3.48	3.56667	3.05667	4.03333	33.94	4.18667	3.55
429.748	3.99	2.87	2.46333	3.79667	41.8	3.62667	2.62333	3.25667	2.6	3.17	4.38333	31.3133	4.12333	3.36667	5.23667	2.76667	3.35	5.08	40.2033	2.64	3.74333	3.55667	3.24333	3.48	4.87667	49.4633	8.23333	5.49667	3.40333	3.35333	3.64	3.73667	60.2033	2.61667	2.94	4.77333	3.33333	3.38667	4.94333	53.8267	3.62667	4.38333	3.45	3.55	3.03333	4.01667	33.8667	4.15667	3.53333
430.102	4.00333	2.86667	2.48	3.81333	41.8333	3.63	2.63	3.25333	2.60333	3.19	4.38333	31.2533	4.11333	3.36	5.25	2.77333	3.34667	5.09333	40.26	2.63333	3.75333	3.57333	3.24	3.49667	4.90333	49.4533	8.23	5.49	3.39667	3.38	3.65	3.75	60.3433	2.62	2.94333	4.75667	3.31667	3.38	4.96	53.8967	3.6	4.36333	3.42667	3.54333	3.01667	4.01667	33.85	4.14667	3.51667
430.456	4.02333	2.88333	2.49667	3.86	41.9133	3.65	2.65333	3.27	2.61333	3.23333	4.4	31.2667	4.12	3.37333	5.26	2.78667	3.37333	5.14667	40.3167	2.64333	3.77	3.60667	3.26667	3.51	4.93333	49.4967	8.24667	5.51333	3.41	3.4	3.68	3.77	60.5333	2.63667	2.96333	4.76667	3.32667	3.42667	4.98	53.9367	3.62333	4.38333	3.44	3.56333	3.04333	4.04	33.8767	4.15	3.55333
430.81	4.01667	2.87667	2.51	3.87333	42.0233	3.65667	2.65333	3.27667	2.60333	3.23667	4.41333	31.3233	4.12667	3.37	5.26333	2.79667	3.38333	5.16333	40.3833	2.65333	3.78667	3.63667	3.28667	3.51667	4.95667	49.5933	8.28333	5.53	3.41333	3.41333	3.67333	3.77	60.8067	2.65333	2.97	4.76	3.31667	3.44	4.98667	53.9633	3.61667	4.38333	3.45	3.56	3.05	4.05667	33.85	4.16	3.55
431.164	4.00667	2.89667	2.50667	3.88	42.1333	3.68	2.67333	3.30667	2.62	3.26667	4.44	31.3367	4.14667	3.41	5.27667	2.80667	3.39667	5.19	40.4033	2.65333	3.8	3.64667	3.32333	3.54	4.97333	49.6133	8.29667	5.53667	3.42667	3.43667	3.71	3.80333	61.01	2.67	2.98	4.75667	3.31667	3.41333	5.02667	54.03	3.61333	4.40333	3.45	3.56333	3.04	4.07	33.85	4.18	3.56667
431.518	3.99333	2.89333	2.51333	3.86333	42.25	3.67	2.67667	3.3	2.59667	3.24333	4.43667	31.3367	4.13667	3.39667	5.29	2.79667	3.39	5.21	40.43	2.63	3.80667	3.64333	3.31333	3.55667	4.98	49.68	8.31333	5.51667	3.41667	3.42667	3.72	3.79	61.1933	2.67667	2.99667	4.77333	3.32333	3.43	5.07333	54.0667	3.63667	4.42667	3.48333	3.59667	3.06	4.09	33.8767	4.21	3.59333
431.872	3.99	2.88667	2.50667	3.85667	42.3233	3.64333	2.66667	3.29333	2.58	3.24667	4.43	31.4067	4.13333	3.4	5.27	2.80333	3.39333	5.23	40.4467	2.62667	3.82	3.63667	3.31333	3.55	5.00333	49.7133	8.33667	5.53667	3.43333	3.42333	3.71	3.77667	61.3133	2.66667	2.98333	4.79333	3.37667	3.45667	5.11667	54.1067	3.69333	4.46	3.52333	3.65667	3.10333	4.11	33.8633	4.27	3.62
432.226	3.96333	2.85	2.49333	3.83667	42.3533	3.62667	2.64667	3.27667	2.56	3.22	4.43333	31.42	4.13	3.39667	5.25	2.78667	3.38	5.21333	40.4633	2.61667	3.80667	3.61333	3.29667	3.55	4.99333	49.69	8.33333	5.51333	3.42	3.39667	3.69	3.77	61.4233	2.64667	2.96333	4.79333	3.37	3.42	5.11667	54.06	3.69	4.46	3.51333	3.64667	3.10333	4.11667	33.8	4.28667	3.62333
432.58	3.99333	2.85333	2.47667	3.83	42.4467	3.63	2.64333	3.27667	2.55333	3.20667	4.41333	31.43	4.14333	3.38	5.27	2.81333	3.37667	5.24333	40.4967	2.60333	3.79333	3.59667	3.3	3.53667	5.03667	49.7133	8.33667	5.50333	3.43	3.39333	3.70667	3.77333	61.54	2.61	2.97333	4.82667	3.41333	3.46	5.16	54.1267	3.71333	4.5	3.54333	3.67667	3.14	4.14	33.8267	4.32	3.68
432.934	4.01333	2.84	2.49333	3.84333	42.48	3.61667	2.63333	3.25333	2.53667	3.20667	4.40333	31.4233	4.12667	3.32667	5.29	2.83333	3.39667	5.26	40.5233	2.61667	3.79333	3.59333	3.27333	3.53	5.05333	49.8033	8.37	5.52	3.44	3.39333	3.7	3.75333	61.5333	2.6	3	4.85333	3.44667	3.50667	5.18333	54.1333	3.73667	4.54	3.57	3.71	3.17333	4.17	33.8367	4.35	3.70333
433.288	4.02	2.87333	2.5	3.87667	42.5467	3.62333	2.63333	3.25667	2.55667	3.24	4.43333	31.5	4.14667	3.35667	5.31	2.86667	3.41333	5.25	40.67	2.64	3.80667	3.60667	3.31	3.54333	5.06667	49.94	8.4	5.53667	3.46	3.42333	3.72	3.77667	61.6433	2.60667	3.00333	4.85333	3.47667	3.52667	5.2	54.1	3.75333	4.54667	3.55667	3.70333	3.22	4.18333	33.85	4.35667	3.71667
433.642	4.05333	2.9	2.53	3.91667	42.61	3.66333	2.66	3.29	2.58333	3.25667	4.46667	31.5933	4.15667	3.38667	5.36333	2.89	3.43667	5.27333	40.7867	2.67333	3.81	3.63	3.33	3.58667	5.09333	50.1	8.42	5.55667	3.46	3.46667	3.78	3.79667	61.8	2.63667	3.04667	4.85667	3.45	3.51333	5.17333	54.1433	3.71	4.55333	3.54667	3.66333	3.21333	4.19	33.9067	4.33333	3.73667
433.996	4.08333	2.93667	2.54333	3.93667	42.65	3.67	2.68	3.29667	2.62667	3.28	4.48333	31.6233	4.18333	3.40667	5.38667	2.94	3.47	5.31	40.86	2.7	3.83333	3.67333	3.34667	3.62667	5.11333	50.14	8.46	5.57333	3.49667	3.50667	3.80333	3.81	61.8433	2.66333	3.06	4.85333	3.45	3.51	5.19333	54.2733	3.68667	4.53667	3.54667	3.66333	3.22	4.19	33.9533	4.33333	3.74333
434.35	4.10333	2.94667	2.56667	3.96667	42.7133	3.69	2.70333	3.32	2.67	3.32333	4.52	31.6967	4.17667	3.41333	5.41	2.95667	3.51333	5.31667	40.92	2.72	3.85667	3.69333	3.36333	3.67	5.12	50.1867	8.5	5.6	3.52	3.54	3.82667	3.84667	61.98	2.72	3.07	4.83667	3.44	3.49667	5.19333	54.3033	3.65	4.53	3.50667	3.66	3.21333	4.19333	33.9033	4.34	3.73
434.703	4.10333	2.93667	2.54333	3.94333	42.81	3.68667	2.69333	3.33333	2.66667	3.31333	4.52	31.76	4.19333	3.43	5.40667	2.95333	3.52333	5.30667	40.96	2.72	3.87	3.69	3.36667	3.68333	5.10333	50.2167	8.49	5.59333	3.52	3.53667	3.82	3.85	62.1967	2.72667	3.05	4.86333	3.46667	3.50333	5.22	54.4067	3.68	4.55667	3.55333	3.67667	3.23667	4.20667	33.9267	4.37667	3.78333
435.057	4.15	2.98333	2.58667	3.98	42.8967	3.73333	2.73667	3.38667	2.70333	3.35	4.54333	31.8267	4.24333	3.44333	5.46	2.98333	3.58333	5.38667	41.01	2.75667	3.92	3.73333	3.40333	3.73	5.18	50.22	8.53	5.65667	3.55	3.58333	3.86667	3.89667	62.35	2.76	3.08333	4.89667	3.49667	3.56333	5.26333	54.5067	3.73333	4.58667	3.62667	3.72333	3.26	4.25	33.9433	4.42333	3.82333
435.411	4.18	3	2.58667	3.99333	42.9867	3.74	2.75	3.38667	2.72333	3.37	4.57333	31.8333	4.25333	3.45	5.46	3.01667	3.60333	5.41333	40.9967	2.75	3.95667	3.74	3.42	3.75333	5.19667	50.2267	8.57667	5.65333	3.59333	3.59333	3.87333	3.93667	62.5033	2.78	3.09667	4.9	3.54667	3.60667	5.29333	54.5933	3.74333	4.59667	3.63667	3.74333	3.26333	4.26667	34.0033	4.45667	3.83333
435.764	4.18667	3.02333	2.59	4	43.0467	3.72	2.73667	3.40667	2.70667	3.36667	4.55333	31.89	4.25667	3.44	5.48333	3.03	3.62	5.45	41.0533	2.74	3.96667	3.74	3.44	3.73667	5.21667	50.3567	8.56333	5.65333	3.58667	3.59	3.87667	3.94333	62.6933	2.76667	3.11333	4.92667	3.60667	3.66	5.34333	54.7733	3.81333	4.65667	3.66667	3.78667	3.29333	4.30333	34.0567	4.48667	3.87667
436.118	4.20333	3.06	2.62667	4.02333	43.1467	3.71667	2.75333	3.42	2.71	3.37	4.58	31.9	4.27667	3.48667	5.52667	3.06333	3.63	5.5	41.1233	2.75	4.00667	3.76	3.45333	3.75667	5.23333	50.4033	8.60667	5.65	3.60667	3.58333	3.89667	3.95667	62.8867	2.74667	3.14	4.95667	3.66667	3.68667	5.39	54.9133	3.87667	4.69667	3.73	3.81667	3.34333	4.33333	34.1667	4.53	3.94
436.471	4.24333	3.11	2.68333	4.07	43.21	3.75667	2.80333	3.46	2.75	3.40333	4.61667	31.9867	4.32667	3.53	5.58	3.11333	3.66333	5.56333	41.22	2.77667	4.04667	3.81333	3.5	3.82	5.29667	50.4867	8.68	5.7	3.64667	3.61	3.95	4.01	63.0233	2.75333	3.18	4.95667	3.65667	3.69	5.39667	54.9467	3.85333	4.69	3.7	3.82667	3.33	4.35667	34.11	4.54333	3.91667
436.825	4.2	3.04	2.6	3.99333	43.24	3.70667	2.72333	3.40333	2.68	3.33	4.57	31.9667	4.27	3.47	5.5	3.09333	3.6	5.53333	41.1067	2.7	3.96667	3.75333	3.44667	3.77333	5.24333	50.52	8.64333	5.61333	3.58667	3.55333	3.89	3.95333	63.1233	2.68667	3.13333	4.99	3.70333	3.71	5.43667	55.0733	3.85667	4.70333	3.70667	3.86333	3.34333	4.40333	34.18	4.59333	3.92667
437.178	4.17	3.01333	2.57333	3.96333	43.3167	3.64333	2.68667	3.38	2.63	3.3	4.53333	31.9567	4.25	3.45	5.49333	3.06667	3.60667	5.52333	41.13	2.68333	3.92667	3.75667	3.42	3.75	5.25333	50.5167	8.64333	5.60333	3.54667	3.53333	3.88	3.94667	63.2133	2.62667	3.10333	5.01	3.70333	3.7	5.47333	55.1533	3.87	4.75	3.73	3.89	3.39	4.45667	34.1067	4.61333	3.97333
437.531	4.2	2.99667	2.58667	3.98	43.44	3.71333	2.68333	3.38667	2.64	3.33	4.57	31.9567	4.28667	3.46	5.49667	3.04	3.62333	5.54667	41.1533	2.69667	3.95333	3.79	3.44333	3.79667	5.29333	50.5033	8.69667	5.61	3.56333	3.54333	3.9	3.97	63.33	2.65333	3.11	5.03	3.72333	3.73	5.49	55.1733	3.87	4.78333	3.76333	3.92667	3.42333	4.48333	34.1533	4.68667	3.98667
437.885	4.21333	2.99333	2.59333	3.99	43.52	3.72333	2.66667	3.40333	2.62667	3.33333	4.57333	32.0267	4.29667	3.46	5.49333	3.02	3.63	5.56667	41.2067	2.7	3.94333	3.78	3.48333	3.82333	5.29	50.58	8.71	5.62	3.56	3.54	3.91667	3.97	63.44	2.67	3.11	5.03667	3.7	3.73667	5.48333	55.1267	3.86667	4.77667	3.75333	3.93667	3.39667	4.47333	34.07	4.70333	3.96
438.238	4.20333	2.98333	2.6	4.02333	43.6933	3.71333	2.68	3.40667	2.62333	3.35333	4.61	32.09	4.29	3.43667	5.49	3.02333	3.68	5.60333	41.3233	2.7	3.94667	3.79333	3.49667	3.82	5.33667	50.71	8.71667	5.61667	3.56333	3.57333	3.95667	3.97	63.67	2.69667	3.10333	5.07	3.73333	3.78	5.50667	55.2867	3.88667	4.81667	3.81	3.97	3.43667	4.48333	34.16	4.71	4.00333
438.591	4.20333	2.95667	2.62333	4.06	43.85	3.66667	2.69667	3.38333	2.63333	3.38667	4.63	32.19	4.28333	3.44667	5.51	3.01	3.7	5.59	41.43	2.69667	3.96333	3.79333	3.49667	3.82333	5.33667	50.78	8.72333	5.61667	3.57333	3.56333	3.96	3.98	63.7867	2.68333	3.11333	5.08667	3.72333	3.76667	5.47	55.44	3.86667	4.86333	3.78667	3.95333	3.44333	4.48	34.1767	4.71	4.00333
438.945	4.25667	3.02667	2.72667	4.13333	44.01	3.78333	2.77333	3.48333	2.71	3.47333	4.72667	32.2833	4.37667	3.50667	5.58	3.10333	3.78333	5.68667	41.62	2.76333	4.04667	3.85	3.59	3.93	5.43333	50.8967	8.79667	5.69333	3.66	3.63667	4.00333	4.05333	63.9567	2.75667	3.21333	5.15	3.76333	3.87333	5.51667	55.59	3.91667	4.90333	3.84667	4.02333	3.51333	4.51	34.29	4.79333	4.06333
439.298	4.29333	3.08	2.77	4.15333	44.1533	3.77667	2.82	3.51667	2.74	3.49333	4.75	32.4133	4.36333	3.53	5.64333	3.16667	3.82667	5.73333	41.76	2.79	4.05	3.87	3.59667	3.97667	5.47	51.06	8.78667	5.71333	3.68333	3.70667	4.04667	4.07667	64.12	2.77333	3.28	5.17667	3.76667	3.89667	5.53667	55.7033	3.92333	4.92667	3.83333	4.02333	3.51	4.52333	34.31	4.77	4.11667
439.651	4.32667	3.13	2.80333	4.17	44.2733	3.8	2.87667	3.51333	2.80333	3.57	4.81	32.5267	4.42333	3.55	5.68333	3.21	3.9	5.77	41.8367	2.83667	4.10667	3.92667	3.63333	4.01	5.55333	51.2167	8.84333	5.76667	3.71	3.80667	4.08333	4.13667	64.2167	2.77333	3.31333	5.21333	3.80333	3.94333	5.59667	55.9133	3.93333	4.95667	3.88667	4.06667	3.57333	4.58667	34.4767	4.85667	4.16333
440.004	4.44333	3.18333	2.83	4.19667	44.3167	3.87333	2.88333	3.55667	2.83667	3.61	4.86333	32.5667	4.44	3.62333	5.72333	3.27333	3.94333	5.79667	41.84	2.88667	4.16667	4	3.68667	4.07333	5.57667	51.1733	8.87667	5.79333	3.72667	3.84333	4.07	4.19667	64.2333	2.80667	3.40333	5.2	3.81333	3.96333	5.58667	56.0433	3.92	4.94333	3.88333	4.07667	3.59	4.57333	34.54	4.89667	4.15667
440.357	4.51	3.23333	2.88667	4.23667	44.3733	3.91333	2.9	3.63	2.88333	3.64333	4.9	32.6033	4.48667	3.68	5.77	3.32667	4.01	5.88667	41.9867	2.94667	4.19	4.05	3.72333	4.15	5.64333	51.1567	8.93667	5.86333	3.77	3.91667	4.12333	4.24	64.2933	2.84333	3.44667	5.20667	3.84333	3.98333	5.68	56.0767	3.92667	4.94667	3.92667	4.12667	3.60333	4.56	34.6233	4.98333	4.22
440.71	4.49333	3.19	2.82	4.20667	44.37	3.89	2.84667	3.54	2.88333	3.59333	4.86	32.6567	4.47	3.63667	5.74	3.29667	4.01	5.86667	42.0333	2.86667	4.13667	4.02667	3.66	4.08333	5.57	51.2133	8.92333	5.81333	3.74333	3.89	4.13667	4.20333	64.2967	2.83333	3.37	5.21	3.82333	3.92667	5.65333	56.1667	3.88	4.93	3.91	4.1	3.54	4.55333	34.5767	4.93333	4.19333
441.063	4.50333	3.23	2.83	4.22333	44.4233	3.89333	2.87	3.55333	2.86	3.60333	4.91	32.72	4.48333	3.65	5.73	3.34	4.03333	5.86667	42.03	2.88	4.18	4.02	3.66667	4.06	5.56667	51.2367	8.97333	5.83	3.77	3.86	4.13667	4.20333	64.2167	2.83667	3.34667	5.2	3.83667	3.90667	5.69	56.29	3.87333	4.89333	3.95667	4.12333	3.54667	4.59333	34.66	4.94	4.17
441.416	4.54	3.22	2.84667	4.22667	44.46	3.90333	2.83333	3.59	2.87667	3.58667	4.88667	32.7667	4.44667	3.67667	5.72667	3.35333	4.02	5.89667	42.0633	2.86333	4.15667	4.03	3.64667	4.02667	5.59	51.3067	8.96667	5.81	3.79667	3.84333	4.16667	4.18333	64.1667	2.87	3.37	5.23667	3.88333	3.94667	5.71333	56.35	3.92333	4.95333	4	4.16333	3.56667	4.64	34.71	4.93	4.23333
441.769	4.46	3.20667	2.79333	4.17	44.61	3.83667	2.78667	3.53667	2.78667	3.52667	4.83667	32.9333	4.46	3.58	5.7	3.28333	3.96333	5.84667	42.17	2.78333	4.08333	3.99	3.58667	3.94667	5.55	51.5033	8.95	5.75333	3.78	3.81	4.16667	4.13333	64.2133	2.80667	3.26	5.28333	3.91667	3.97667	5.76667	56.4367	3.97333	5.03667	3.99667	4.20333	3.61667	4.74333	34.7867	4.98333	4.27
442.122	4.46	3.24333	2.79333	4.21667	44.6767	3.90667	2.79333	3.53	2.79333	3.52333	4.87	33.0533	4.48667	3.55333	5.75667	3.3	3.96667	5.87	42.2533	2.76667	4.14	3.99	3.62	3.99	5.6	51.66	8.99333	5.74	3.81	3.81667	4.17667	4.16333	64.3167	2.81	3.28333	5.25	3.96667	4.03	5.73	56.6367	4.02333	5.02333	4.02667	4.24333	3.64	4.84	34.8367	4.96667	4.26333
442.474	4.43333	3.28	2.84333	4.24	44.8033	3.92333	2.81667	3.57333	2.74667	3.50333	4.89667	33.2167	4.46333	3.57667	5.79667	3.32	3.9	5.90333	42.2833	2.83667	4.19333	3.99	3.68	3.99667	5.61667	51.7133	8.98333	5.73333	3.80333	3.80333	4.15667	4.16	64.4433	2.79667	3.33	5.27333	4.03333	4.09333	5.77333	56.75	4.07	5.03	4.04667	4.27333	3.68333	4.87	35.0533	5.00333	4.30667
442.827	4.45667	3.24667	2.85667	4.24	44.91	3.96333	2.83333	3.6	2.81333	3.52	4.91	33.4033	4.47	3.59	5.88	3.30333	3.94667	5.93	42.3933	2.87667	4.22	4.03	3.72333	4.06	5.67	51.8	8.99667	5.78667	3.82667	3.86667	4.21	4.22	64.6067	2.78667	3.42667	5.44333	4.16	4.22	5.91333	56.8033	4.25	5.2	4.15333	4.40667	3.83667	4.99333	35.15	5.18	4.42
443.18	4.38333	3.22	2.78667	4.24667	45.01	3.92667	2.75667	3.58667	2.76333	3.48667	4.93	33.56	4.46667	3.52	5.9	3.28333	3.93333	5.89	42.5767	2.87	4.19	3.98	3.67667	4.07667	5.70333	51.8067	8.99667	5.74	3.82333	3.89333	4.17	4.22	64.8433	2.69	3.42333	5.47333	4.16333	4.25667	5.92667	56.9333	4.26667	5.23667	4.15	4.42	3.89333	4.99333	35.2667	5.27333	4.43667
443.533	4.4	3.19667	2.83667	4.27667	45.01	3.93667	2.77333	3.54	2.82333	3.52	4.96667	33.7067	4.45667	3.56667	5.9	3.31667	3.96333	5.99	42.75	2.87	4.18667	3.95333	3.71	4.08	5.71667	51.9533	8.98	5.76333	3.88667	3.89667	4.12333	4.2	64.9667	2.68333	3.47	5.48	4.15333	4.23	6.01333	57.1167	4.29	5.26333	4.28333	4.43333	3.92	4.97333	35.4833	5.30333	4.49667
443.885	4.58333	3.36	2.97	4.34	45.2367	4.05	2.91	3.66333	2.92	3.69667	5.13	34.0367	4.56667	3.75333	6.05	3.45667	4.11333	6.14667	43.0033	2.99	4.31667	4.08	3.84667	4.17333	5.84	52.1833	9.04333	5.92667	4.01667	4.02	4.27333	4.35333	65.1367	2.81333	3.64667	5.56333	4.13	4.17667	6.10333	57.24	4.29333	5.29667	4.29333	4.4	3.96667	4.97333	35.6667	5.33333	4.55333
444.238	4.63667	3.39333	2.92667	4.36	45.3167	3.99667	2.89333	3.69333	2.92333	3.73667	5.20333	34.0767	4.57667	3.77	6.06667	3.45	4.17667	6.20333	43.17	2.96	4.32333	4.12	3.84667	4.22333	5.91667	52.41	9.08667	5.92667	4.06333	4.06667	4.34667	4.39	65.1067	2.79	3.63	5.58333	4.13333	4.16	6.19	57.39	4.35	5.41	4.32333	4.38667	4.00667	5.01	35.8033	5.38333	4.62333
444.59	4.63333	3.43667	2.91667	4.41	45.3867	3.98333	2.92	3.67333	2.91333	3.79667	5.26333	34.2667	4.68	3.81667	6.03333	3.55	4.12667	6.31667	43.3467	2.98667	4.33333	4.04667	3.87667	4.29667	5.97333	52.5367	9.18333	5.88333	4.12	4.08667	4.38	4.36667	65.1167	2.84667	3.65	5.47667	4.15667	4.11	6.15	57.6833	4.33333	5.43	4.36667	4.44	4.00667	5.07667	36.0667	5.39667	4.76
444.943	4.75	3.54	2.97667	4.48667	45.4667	4.06667	3.03667	3.69	2.92	3.81	5.32667	34.51	4.82	3.86667	6.12667	3.64667	4.16333	6.43333	43.4433	2.95	4.44	4.08667	3.91667	4.31667	5.93	52.78	9.24	5.92333	4.18	4.08	4.46	4.44333	65.1133	2.93333	3.76	5.56	4.3	4.18333	6.28667	58.02	4.48667	5.53	4.51667	4.59333	4.06	5.18333	36.3533	5.48	4.91
445.295	4.63667	3.58333	2.99	4.51333	45.6167	4.06333	3.02	3.74	2.86667	3.79333	5.29667	34.6733	4.76333	3.84333	6.18	3.64333	4.13333	6.45	43.5733	2.92	4.46667	4	3.91333	4.39	5.99333	52.82	9.23667	5.87667	4.10667	4.09	4.63333	4.61333	64.9333	3	3.81333	5.56	4.37	4.28333	6.28	58.28	4.52667	5.55	4.45333	4.63	4.12333	5.22667	36.5467	5.54	5.01333
445.648	4.50333	3.44667	2.9	4.41667	45.7267	3.94333	2.85667	3.61	2.74333	3.61	5.34333	34.8267	4.66667	3.74333	5.98667	3.53333	4.01333	6.30667	43.6433	2.81667	4.31	3.83667	3.78667	4.34333	5.92667	52.9333	9.20333	5.71333	4.06667	3.97667	4.62333	4.50667	64.96	2.89333	3.65	5.78333	4.57667	4.56667	6.42	58.4833	4.76333	5.82667	4.66333	4.90333	4.28	5.52	36.7633	5.77667	5.22667
446	4.54333	3.48667	2.89333	4.41667	45.7633	3.97333	2.84667	3.60333	2.85667	3.60667	5.33333	35.3	4.78333	3.74	5.99333	3.55667	4.05667	6.29	43.69	2.82	4.37667	3.75667	3.72333	4.31667	5.94333	52.91	9.25667	5.80667	3.97333	4.12	4.70333	4.52	64.9833	2.92667	3.80333	5.82333	4.62	4.60667	6.43333	58.7867	4.86333	5.80333	4.83	4.97	4.37333	5.53	37.0267	5.82	5.40667
446.353	4.51333	3.44333	2.99	4.51	45.89	3.94667	2.79333	3.51333	2.84	3.58	5.39	35.4933	4.82333	3.66333	5.94333	3.51	4.05	6.22333	43.7833	2.67	4.36667	3.82	3.57333	4.29	5.94	52.9933	9.19	5.71667	3.88333	4.10333	4.67667	4.63	65.1133	2.88	3.72333	6.04333	4.7	4.74	6.57667	59.05	4.88333	5.92667	4.96667	4.95	4.55	5.49333	37.3833	5.89	5.41333
446.705	4.54333	3.45667	3	4.55333	46.0433	3.92333	2.71	3.58333	2.78333	3.70333	5.4	35.6633	4.72	3.73	5.91333	3.59	4.17333	6.24	43.9867	2.77333	4.4	3.8	3.66	4.25667	6.02	53.1167	9.23333	5.76333	3.92	4.06333	4.75	4.67	65.2	2.93	3.68333	6.04667	4.58	4.69333	6.68	59.09	4.83	5.86333	4.86	4.88667	4.51667	5.42333	37.3833	5.72333	5.35667
447.057	4.98333	3.61667	3.11	4.78	46.28	4.05333	2.79333	3.75	3.05667	3.82	5.66	36.1433	4.95	3.89	6.02667	3.82667	4.40333	6.37333	44.2433	3.04	4.49	3.99333	3.87667	4.37	6.14333	53.2467	9.46667	5.84667	4.14333	4.32	4.82	4.83333	65.3033	3.03	3.92	6.24	4.78667	4.79667	6.85667	59.33	5.09333	6.02	5.09	5.10333	4.69	5.61	37.5867	5.82	5.49
447.409	4.83333	3.69	3.01333	4.87667	46.2433	3.91333	2.82333	3.80333	3.2	3.92667	5.58333	36.2267	4.94	3.84333	6.17333	3.89333	4.49	6.63333	44.2733	2.92667	4.41	4.12667	3.92	4.39	6.12333	53.15	9.39667	5.85667	4.02	4.42667	4.80333	4.84333	65.2467	2.98	3.95333	6.03333	4.6	4.44667	6.80667	59.56	4.71667	5.84667	4.87333	4.79667	4.64	5.17667	37.7533	5.49	5.25667
447.762	4.93333	3.83333	3.12333	5.09	46.6367	3.97333	2.94667	3.92667	3.23667	4.07667	5.66667	36.6067	4.92333	3.94333	6.3	4.08667	4.51333	6.82	44.53	3.04	4.40667	4.23333	4.05	4.62333	6.23	53.4967	9.43667	5.81333	4.27333	4.35	4.92333	4.97	65.3433	3.00333	3.94667	6.13333	4.93667	4.56	6.95667	59.9867	4.77667	6.05	4.82667	4.98	4.72333	5.37	37.9867	5.62333	5.16667
448.114	5.04333	3.87333	3.1	5.02	46.6367	3.96	2.79	4.10667	3.26333	4.01	5.58333	36.9333	4.91	3.96	6.42333	4.17667	4.62333	6.90333	44.4467	2.97333	4.34667	4.26333	4.17667	4.54	6.15	53.6667	9.66667	5.93667	4.23333	4.30333	5.02	4.99	65.3567	3.03667	3.99667	5.89333	4.86333	4.42333	6.81	60.1967	4.66	5.68333	4.48667	4.91667	4.47333	5.23333	38.0233	5.38333	5.12
448.466	5.06	4.05333	3.19	4.98667	46.84	4.03	2.91	4.13333	3.4	4.08333	5.8	37.36	5.01	3.95	6.58333	4.17667	4.49333	6.95667	44.5933	3.02	4.33	4.33	4.23333	4.73667	6.18333	53.5667	9.75667	5.98	4.26333	4.53333	5.06333	5.08	65.35	3.05333	4.10333	5.71667	4.77667	4.26	6.53	60.4133	4.43333	5.59333	4.36667	4.72667	4.52333	5.26	38.0433	5.42667	5.05333
448.818	5.23	4.33667	3.4	5.11667	46.7	4.23667	3.13667	4.39667	3.61667	4.19	6.08333	37.4667	5.22333	4.07667	6.96667	4.44333	4.68	7.22333	44.6267	3.14	4.61	4.45667	4.36667	4.93	6.48333	53.6467	10.01	6.38	4.55333	4.80333	5.29333	5.33667	65.4233	3.25667	4.29667	5.67333	4.73	4.18667	6.49	60.5433	4.29667	5.58667	4.33333	4.81667	4.32667	5.26667	38.22	5.40333	5.08
449.17	5.26667	4.28667	3.44333	5.09333	46.8367	4.28667	3.05333	4.26	3.38667	4.21	5.90667	37.6667	5.11	4.06	7.05667	4.36333	4.56	6.95	44.62	3.15	4.78	4.28667	4.20333	4.81	6.37333	53.5167	10.18	6.21333	4.65	4.70333	5.12667	5.11333	64.9833	3.22	4.26	5.80667	4.94	4.54333	6.56	60.48	4.73667	5.9	4.71333	5.17	4.49333	5.7	38.2433	5.65333	5.47333
449.522	5.34667	4.31333	3.52333	4.95	46.6467	4.32333	2.97	4.22	3.40667	4.32667	5.99	37.6367	5.29667	4.18333	7.22667	4.32333	4.66333	7.02333	44.6033	3.24333	4.87333	4.32333	4.30333	4.71333	6.43	53.3033	10.2033	6.22667	4.75	4.75667	5.01	5.09667	64.8267	3.32333	4.35	5.85333	4.75	4.66	6.68333	60.0967	4.86667	5.88667	4.90667	5.16	4.67	5.60667	38.2567	5.67	5.68333
449.874	5.34	4.48667	3.30333	4.92333	46.8067	4.24333	3.14667	4.17	3.52	4.45	6.10333	37.58	5.21333	4.28667	7.17667	4.28667	4.75333	6.94333	44.9	3.32667	4.81333	4.23667	4.27667	4.65	6.52	53.1533	10.04	6.09667	5.01	4.83333	5.08667	5.07333	64.54	3.20333	4.19667	5.70333	4.46333	4.52	6.49667	60.21	4.54	5.96333	4.88	4.86	4.48333	5.51	38.06	5.53667	5.31
450.226	5.58667	4.41	3.37333	4.98333	46.9567	4.19333	3.22	4.17667	3.76	4.63	5.95	37.8467	5.36333	4.28	7.14333	4.39333	4.96	7.14	44.83	3.43333	4.69	4.05333	4.17667	4.68667	6.52667	53.3833	10.0067	6.05	5.10333	4.72333	5.17	5.03333	64.3267	3.35667	4.18	5.83667	4.82	4.94	6.60667	60.4067	4.77	6.18333	5.10667	5.08	4.59667	5.41333	38.44	5.78	5.49667
450.578	5.43	4.14333	3.15333	4.79	47.1767	3.98333	3.18	3.92333	3.38667	4.75667	5.89333	37.8233	5.24	4.26	6.91667	4.19333	4.84667	6.91667	44.7633	3.28333	4.61	3.88	3.95	4.52	6.39667	53.2233	9.84	5.58	4.81333	4.49333	5.02	4.64	64.1167	3.17667	3.86667	5.70333	4.58667	4.82333	6.31667	60.34	4.55333	6.04667	4.87333	4.72	4.56333	5.21667	38.1967	5.50333	5.45667
450.929	5.41333	4.29667	3.08333	4.73333	46.6867	4.02	3.32667	4.19667	3.58667	4.70333	6.07	37.9	5.44667	4.33667	6.74333	4.31	4.82333	7.17667	44.2667	3.34667	4.66333	3.81667	4.12333	4.39333	6.43333	53.06	9.64333	5.66667	4.99	4.60667	5.14667	5.00333	63.8133	3.15667	3.97	5.6	4.45	4.58	6.36	60.5767	4.36	5.79	4.67	4.51667	4.29333	5.2	38.33	5.59333	5.28
451.281	5.15333	4.02667	2.81667	4.63667	47.0833	3.77	3.32667	3.92	3.31	4.52	5.86667	38.2433	5.07	3.95	6.59667	4.21333	4.65333	6.86	44.3533	3.06333	4.37333	3.4	3.79	4.19	6.33	52.9267	9.37333	5.43	4.79667	4.40333	5.16667	4.85333	63.9433	3.06667	3.77	5.61	4.56333	4.63	6.27333	61.21	4.44333	5.83333	4.97667	4.86333	4.12667	5.37333	38.4767	5.62	5.28667
451.633	4.91333	3.87	2.99333	4.6	47.0867	3.66667	3.06667	3.63333	3.13333	4.26667	5.91667	38.62	4.96333	3.78333	6.66	4.16333	4.35667	6.91	44.5133	3.01	4.21667	3.25	3.66333	4	6.21667	53.26	9.21	5.49667	4.62	4.3	5.03	4.78	64.3133	2.89	3.98667	5.76333	4.50667	4.86	6.40333	61.1333	4.88667	5.79	5.01667	5.12667	4.22333	5.49333	38.63	5.84667	5.73
451.985	4.67667	3.98667	3.06333	4.78333	46.9867	3.85667	3.21333	3.70333	3.18	4.00667	6.21667	38.5933	5.12	3.98	6.7	4.4	4.48667	7.02	44.5767	2.74	4.50667	3.32333	3.74667	4.03333	6.38333	53.05	9.3	5.74	4.87333	4.55	5.40667	5.04	64.1733	3.02333	4.25667	6.18	4.57	4.97667	6.71333	61.6267	5.18	5.78333	5.39	5.45	4.24667	5.87333	39.0867	5.89667	6.09667
452.336	4.97333	4.29333	3.39667	5.01	46.9967	4.07	3.22667	4.05	3.55333	4.16	6.32	39.0433	5.11333	4.15333	6.74333	4.61	4.66333	7.42	44.8267	3.03667	4.5	3.49333	4.03	4.28667	6.59	53.0567	9.48	6.21333	5.3	4.63	5.68667	5.45333	64.2933	3.28	4.69667	6.49667	5.00667	5.46333	7.06	61.5833	5.49333	6.10667	5.75667	5.82	4.57667	6.24333	39.4267	6.28333	6.27667
452.688	5.47667	4.71333	4.01	5.54333	47.9867	4.55667	3.77667	4.25667	3.82667	4.49667	6.77333	39.9233	5.19	4.41	7.38333	4.87667	5.14	7.60667	45.72	3.43333	4.79	3.96667	4.21667	4.86667	7.05	53.95	9.85667	6.66	5.45667	4.71	6.07667	5.76	64.84	3.70667	4.97	6.57667	4.82667	5.35333	6.94667	61.83	5.40333	6.15333	5.82667	5.79	4.74	6.02667	39.7	5.94667	6.37333
453.039	5.96667	5.33	4.53667	5.64667	47.7633	4.92	3.89667	4.79	4.16667	4.82333	7.49667	40.12	5.58667	4.89333	7.74	5.38	5.43	8.1	45.7333	3.64667	5.13	4.44333	4.71667	5.08	7.48333	54.3133	10.3867	7.09	5.49	5.02	6.42	6.23667	64.37	4.08333	5.42667	6.32333	4.50667	5.11333	6.86667	62.31	4.94333	5.85	5.22	5.44667	4.56	5.83667	39.9567	5.51667	6.22
453.391	6.34667	5.32667	4.46667	5.63667	47.7967	5.17667	3.92667	4.77667	4.07	5.09667	7.50333	40.32	5.46	4.96667	7.55333	5.55	5.61	7.91	45.4433	3.57333	5.27667	4.56667	4.74	5.2	7.46	53.9633	10.38	7.08333	5.59667	5.02333	6.32667	6.20667	63.92	4.52667	5.34	6.18667	4.93667	5.23	7.09	62.99	5.01667	6.1	5.38667	5.64667	4.75667	6.05	40.4267	5.6	6.23333
453.742	6.25	5.04	4.30333	5.52333	47.9367	5.02333	3.62667	4.64	3.73333	5.04333	7.38	40.49	4.99333	4.73	7.43	5.25	5.34333	7.65	45.7367	3.72333	5.18333	4.63	4.40667	5.08333	7.27	54.1133	10.1033	6.86333	5.17	4.89	5.80333	6.01333	64.1933	4.47667	5.22	6.16	4.87333	5.20667	7.26667	62.8867	5.02	6.50333	5.28	5.67667	4.87333	6.17667	40.2333	5.62	6.14
454.094	5.46667	4.50667	3.93333	5.06	47.77	4.73667	3.33333	4.07	3.28333	4.27667	6.93333	40.3733	4.63333	4.36333	7.28	4.81	4.87	7.26667	45.47	3.31333	4.92	4.2	3.86	4.6	6.6	54.25	9.38	6.28333	4.39333	4.55	5.42667	5.5	63.64	4.12	4.91667	6.33	4.95667	5.56333	7.75667	63.6167	5.28	6.69667	5.43	5.80333	4.95333	6.20667	40.59	5.66	6.48
454.445	5.36333	4.07333	3.83	4.91	47.73	4.61	2.96	3.78	2.97	3.91	6.54	40.21	4.54333	4.27	6.91333	4.66333	4.67	7.08333	45.5167	2.93333	4.44333	3.99333	3.51667	4.11333	6.34333	54.11	9.01667	5.86667	4.18667	4.89	5.11333	5.49667	63.63	4.07333	4.8	6.16667	4.89667	5.5	7.74667	64.0233	5.17	6.43	4.99	5.68	4.68667	6.14333	40.6733	5.64667	6.49667
454.797	5.04333	3.94333	3.49667	5.14667	47.8367	4.68	3.13667	3.73667	3.02333	3.81667	6.22333	40.2967	4.43	4.10333	6.84667	4.27333	4.69333	6.93333	45.6567	2.95333	4.45	4.07667	3.39333	4.02333	5.86333	53.93	8.73667	5.58	4.49	4.84	4.99667	5.32667	63.8967	3.90333	4.63333	6.42667	5.28333	5.90333	7.89667	63.7667	5.51	6.76333	5.36667	5.84667	5.00667	6.26667	40.7867	6.00333	6.58667
455.148	4.73667	3.68333	3.2	5.17333	47.8167	4.49333	3.17333	3.87	3.02333	3.61333	6.07	40.3933	4.55	3.73667	6.77333	4.05	4.56667	6.99667	45.79	2.91	4.37667	3.80333	3.02667	3.74333	5.88	54.1333	8.52667	5.38	4.29667	4.72333	4.9	5.36667	63.77	3.48667	4.66667	7.27333	5.81333	5.88667	8.34333	63.5667	5.85667	7.30667	5.73667	6.24333	5.51667	6.39667	40.9233	6.16	7.01
455.499	4.67667	3.74667	3.2	5.02	47.8533	4.29667	3.18667	3.98333	3.07333	3.62333	5.75333	40.6867	4.56333	3.66	6.78667	4.00667	4.57667	6.71333	46.2133	2.72	4.09667	3.37667	3.17	3.69667	5.83333	54.5833	8.40667	5.05667	4.1	4.56333	4.6	5.11667	63.4967	3.01333	4.11333	7.53	6.02667	5.82333	8.24333	64.01	5.78667	7.33333	5.76333	6.04667	5.47333	6.39	41.4567	6.46	7.39667
455.85	4.49667	3.54333	3.00667	4.84	47.5467	4.13	2.76667	3.78667	2.72	3.75333	5.47333	40.6233	4.46	3.27	6.75	3.84333	4.18333	6.65333	45.8667	2.45333	4.04667	3.23	2.87667	3.31	5.88333	54.2	8.41	4.9	3.87	4.32667	4.26667	4.92667	63.2767	2.73333	3.59333	7.11333	5.39	4.74333	7.67333	63.61	5.16	6.57	5.47667	5.61333	4.84	5.76	41.39	6.34667	6.73667
456.202	3.97	3.48333	2.71667	4.59	47.1233	4.05	2.65	3.74333	2.9	3.66667	5.50667	40.65	4.46	3.32667	6.38333	3.77667	4.06	6.54333	45.74	2.25	3.9	2.95667	3.40333	3.35333	5.8	53.8667	8.47333	4.43333	3.63333	3.99333	4.31667	4.62667	62.7	2.47333	3.44667	7.28667	5.84667	5.37667	7.74667	63.6367	5.76667	6.88	5.99667	5.81333	5.27	5.72333	41.48	6.81333	7.10333
456.553	4.04333	3.62667	2.96333	4.73667	47.14	4.13	2.87	4.06667	3.24	3.94	5.63667	40.5833	4.5	3.43667	6.68333	4.10333	4.28667	6.63	45.7933	2.61667	4.00333	2.63	3.50667	3.5	6.08667	53.8733	8.75	4.58333	3.68667	4.20333	4.52	4.67	62.23	2.33667	3.50667	7.41667	5.65	5.27667	7.69	64.3533	5.72	6.86	5.92333	5.65	5.1	5.72333	41.6767	6.93667	7.18667
456.904	4.59	4.58333	3.61	5	47.5433	4.61333	2.96333	4.45	3.47	4.59667	6.10667	41.0833	4.94	4.10333	7.26333	4.46333	4.79	7.41	46.5867	3.02	4.60667	3.27333	4.13667	4.12667	6.60667	54.4367	9.4	4.96333	4.14	4.68	5.12333	4.99	62.6367	3.10667	3.86667	6.71333	5.07333	5.45	7.24667	64.3	5.47667	6.42	5.82333	5.47	4.87667	5.64667	41.5867	7.10667	7
457.255	4.82	5.07	4.00333	5.36333	47.2733	5.18	3.5	4.61	3.85667	4.86667	6.74	41.3233	5.41667	4.54333	7.54667	4.98	5.25	8.05	46.12	3.20333	5.23333	4.01667	4.68333	4.38333	7.22333	53.9467	9.9	5.55333	4.87667	5	5.61667	5.56667	62.47	3.42333	4.53667	6.63333	5.03667	5.39	7.19667	63.9367	5.54667	6.35667	5.57	5.73333	5.02667	5.62667	41.6767	7.04667	6.98333
457.606	6.12667	6.23	5.06333	6.58667	48.1867	6.16333	4.74	5.95333	5.1	5.76667	7.81	42.3033	6.19667	5.50667	8.31333	5.95333	6.6	8.98667	46.9233	4.15667	6.37333	5.20333	5.71	5.57333	8.02333	54.3533	10.9233	6.29	5.82333	6.35	6.74333	6.77	62.7667	4.56	5.59	6.65333	5.15667	5.77333	7.14667	64.4033	5.74333	6.51667	5.54	5.98	5.40333	5.85667	41.7633	6.9	7.35333
457.957	6.50667	6.47333	5.43	6.75	48.5833	6.34	4.86333	6.01333	5.04	6.08667	8.14667	42.7633	6.50333	5.12333	8.49667	6.26667	6.74667	9.28667	47.2267	4.56	6.87333	5.53667	5.7	5.73333	8.19	54.5533	11.0533	6.71667	6.22667	6.56667	7.2	6.76333	63.3933	4.6	5.94333	6.91333	5.04667	5.48333	7.12333	64.7233	5.25	6.39	5.48	5.95	5.36	6.25667	42.0733	6.50667	7.29
458.308	6.62667	6.13667	5.38333	6.4	48.35	6.26	4.68	5.76	4.53	6.03333	7.96	43.1267	6.59667	5.04667	8.09667	6.18667	6.62667	9.06333	47.3067	4.26333	6.69667	5.86	5.79	5.63	8.36667	54.88	11.0067	6.68333	6.08	6.63333	7.12	6.80333	63.5667	4.68	6.31333	7.01667	5.03333	5.21667	7.21	64.63	5.34333	6.24	5.49667	6.08333	5.58333	6.07333	42.5067	6.49333	7.34333
458.659	6.49	5.58333	5.23667	6.48667	48.12	6.17667	4.89	5.73333	4.76333	5.51667	7.65	42.7833	6.24667	4.79333	8.06667	5.97667	6.37	8.82333	46.93	3.99667	6.45333	5.28333	5.73333	5.59333	7.95333	54.3167	10.6433	6.11667	5.88333	6.46	6.52667	6.52333	62.9567	4.21	6.09667	7.68667	5.21667	5.52	7.51	65.6767	5.62	6.70333	5.84	6.17333	5.74333	6.47667	43.0833	6.73667	7.29333
459.01	6.67	5.55	5.12667	6.38333	48.4867	5.75333	4.65	5.84	4.45667	5.42	7.27667	42.59	6.11333	4.74667	7.71	5.65667	6.49	8.65333	46.88	4.04667	6.23	4.84667	5.49667	5.70667	7.37667	54.2867	10.26	5.89667	5.58	6.29333	6.75	6.26667	63.05	4.1	6.01333	7.13667	4.99667	5.48333	7.16	66.2767	5.62667	6.44333	5.8	5.97	5.32	6.16	42.94	6.08	7.10667
459.36	5.61333	4.57	4.55	5.49333	48.2633	5.06	4.03667	4.96333	3.98	4.57667	6.76667	42.2233	5.56	4.36667	6.89	5.29667	5.83667	7.82333	46.6267	3.45333	4.95333	3.91	4.91333	4.91	6.93	54.1733	9.52333	5.38333	5.38333	5.74	5.70333	5.30667	62.8967	3.33333	5.26	7.36667	5.76667	6.09	7.32333	66.45	5.88	6.73667	5.76667	6.16	5.67667	6.68667	43.4667	6.36667	6.94333
459.711	5.6	4.62333	4.43333	5.50667	47.9433	5.00667	4.17667	5.14	4.02667	4.63	6.55333	42.13	5.43667	4.82333	7.37	5.70667	5.80333	7.69	46.6633	3.69667	4.98	3.83	4.71667	5.17	6.89667	54.29	9.84	5.23667	5.39	5.66	5.39	5.52667	62.26	3.3	5.02667	7.48	5.76	6.20667	7.49	65.85	6.25667	7.39	5.75	6.42333	5.71	6.84	43.3533	6.35333	6.70333
460.062	5.64333	4.77667	4.55	6	48.35	5.20667	4.32333	5.26333	4.46	4.68333	6.74333	42.3667	5.43667	4.93333	7.84	5.92333	5.91667	7.98667	46.9833	3.65333	5.26	4.14333	4.59333	5.34	6.77333	54.4133	9.91333	5.47	5.48667	5.54333	5.50667	5.76667	62.6333	3.64	5.10333	7.48	5.38	5.94333	7.50667	65.4833	5.79333	7.56667	5.37667	6.13	5.79	6.78	43.0667	5.92333	6.68667
460.413	5.68667	4.76667	4.62333	6.02667	48.49	5.21333	4.58667	5.41	4.41	4.99	6.94	42.6	5.76	5.06667	7.77	6.44333	6.00667	8.05	47	3.74333	5.41333	4.57333	4.48333	5.59667	7.02	54.7533	9.91333	5.80333	5.86667	5.62333	5.71667	6.24	63.11	3.98333	4.96667	7.30667	5.67	5.40333	7.14667	64.6967	5.47	7.61667	5.38667	6.2	5.49667	6.45333	42.7267	5.62667	6.80333
460.763	5.64333	4.61	4.83667	6.06333	48.51	5.45	4.66	5.57667	4.52333	5.34	7.18333	42.7267	6.07667	5.20667	8.21333	6.79333	5.81	8.26333	47.3933	4.08667	5.35	4.88	4.66333	5.38667	7.57	55.1233	10.4867	6.11667	6.21667	5.69667	5.41	6.29333	63.28	4.25667	5.25333	7.50333	5.97667	5.52333	7.98667	64.3733	5.60333	8.08667	5.51667	6.17	5.76333	7.1	43.0933	6.02667	6.61333
461.114	5.71	4.67667	4.59333	6.07333	48.43	5.52	4.73667	5.58	4.23333	5.64333	7.23667	42.5433	6.35	5.17333	8.21	6.64	5.93333	8.70667	47.44	4.25	5.93333	4.86	4.58333	5.25	7.47667	54.9033	10.46	6.36667	6.23333	5.55333	5.91	6.60667	63.46	4.19333	5.51	7.16667	5.23667	4.85667	8.10333	64.52	5.79	7.93333	5.54333	5.98	5.41667	6.78	42.4467	5.76	6.67333
461.464	5.65	4.53	4.53	5.71333	48.4	5.02667	4.41667	5.60667	3.97333	5.45333	7.12667	42.5967	6.36667	4.87	7.90333	6.01667	5.75	8.81	47.05	3.97667	5.67	4.41667	4.55333	5.01333	7.35	54.8367	10.1633	6.68333	5.89667	5.4	5.55	6.53333	63.5933	4.18333	5.39	6.95333	5.35	4.72	8.07333	65.2067	5.69	7.48333	5.53667	5.79333	5.75333	6.15667	42.73	5.83667	6.65
461.815	6.18667	4.81	5.16667	5.75667	48.5867	5.20667	4.81	6.01333	4.3	5.75	7.81667	42.8	6.9	4.93333	7.86667	6.58667	6.14667	9.22333	47.3733	4.57667	6.06333	4.86667	5.04	5.65	7.7	54.55	10.4867	6.87667	6.38667	6.14667	5.59667	6.99333	63.4367	4.39333	5.58333	7.14667	5.86333	5.57	8.20667	65.6367	6.08333	7.69667	6.15667	6.13667	5.85	6.14	42.7933	6.45667	7.02667
462.166	6.09333	4.82333	5.29	6	48.53	5.17667	4.27	5.82667	4.18667	5.9	7.62667	43.1333	6.90667	5.07333	7.98	6.25333	6.15	8.85667	47.59	4.74	5.94	4.50333	5.18	5.13	7.63667	54.3967	10.6867	7.02	5.91333	5.93	5.59333	6.61	63.22	3.70333	5.6	7.68	6.03667	6.12	8.95333	66.1167	6.73667	7.68667	6.27333	6.02333	6.06	6.57667	43.21	7.00333	7.54333
462.516	6.60333	5.10667	5.06667	5.93333	49.0233	5.65667	4.50667	5.89	4.62333	6.1	7.87	43.5567	6.97	5.08	8.20667	6.19667	6.26667	8.82	47.1067	4.74333	6.43667	4.85333	5.54667	5.38667	7.27667	54.53	10.81	7.03333	5.85	6.25333	5.81	6.90333	63.24	3.84	5.37	7.89333	6.00333	6.51333	8.71333	66.68	6.64	7.45333	6.48333	6.24333	6.03	6.44333	43.34	7.34333	7.64333
462.866	6.84333	5.53	5.10667	5.90667	48.8567	5.47667	4.29667	5.98	4.75333	6.19	7.98667	43.5667	6.94	5.08667	8.38	6.15667	5.74	8.26333	46.9	4.5	5.94667	4.65333	5.36667	5.42	6.92333	54.6867	10.6767	6.91	5.58333	6.16	5.61667	6.85333	62.93	3.80667	5.67	8.24333	6.24333	6.66	8.67	66.8867	6.55	7.71667	6.48667	6.48	6.14333	6.3	43.9467	7.70333	7.69333
463.217	6.74667	5.36667	4.96667	5.87333	49.36	5.89667	4.36	5.63	4.71333	6.14	7.79667	43.7067	7.02667	5.05333	8.35	6.01	5.65333	8.51	47.2767	4.19	5.66333	4.96	5.38333	5.50333	6.85	55.0933	10.6433	6.67	5.47	6.18	5.97667	6.63667	62.84	3.86	5.64667	8.36333	5.82	6.67667	8.45	66.43	6.26667	7.57667	6.36333	6.38333	5.74333	6.54333	43.44	7.76333	8.02333
463.567	6.27	5.33333	4.36333	5.28667	49.0433	5.69667	3.70333	4.99333	4.23	5.71333	6.97	44.09	6.53	5.20667	8.30667	5.23667	5.21667	7.91	46.96	3.77	5.42333	4.36	4.86	4.95	6.24333	55.4367	10.1233	6.28667	4.71	5.30333	5.68	5.95667	63.0067	3.43333	5.33667	8.27	5.63	6.25333	8.06333	66.3433	6.23333	7.47667	6.33333	6.70667	5.69333	6.59333	43.4933	7.86333	7.93333
463.917	5.76667	5.23333	4.02667	4.49	48.8467	5.49	3.72	4.51667	3.79667	4.93	7.05333	43.6967	6.28333	4.74667	8.51667	4.79667	5.03667	7.61	46.4367	3.53	5.04333	4.24	4.35667	4.80333	5.65667	55.3	9.93333	5.9	4.64	5.23	5.48667	6.00333	62.7033	3.7	5.22	8.28	5.73667	6.39667	7.77333	66.1933	6.12333	7.73	5.88667	6.76	5.96333	6.56	43.4833	7.40667	7.72
464.268	5.20667	5.28	4.22667	4.79667	48.6133	5.16	3.66333	4.23667	3.47	4.56667	6.94	43.4267	5.99333	4.58	8.33333	4.98	5.22	7.63	46.7567	3.35667	4.66333	4.06667	4.15	4.83	5.98	55.05	9.70333	5.34333	4.53	5.12667	5.53667	5.98667	62.0433	3.54	5.52667	8.08667	5.37667	5.66333	7.38667	66.0333	5.97333	7.12333	5.71667	6.1	5.69	5.89333	42.8	6.60333	7.35667
464.618	5.71667	5.3	4.55333	5.41667	49.1467	5.42667	3.83	4.15667	3.72333	4.43667	6.94	43.9167	5.84333	4.68667	8.49	5.27	5.86333	8.14	47.03	4.03	5.38	4.47333	4.71333	5.17	6.68	55.5533	9.97	5.61667	4.77	5.23	5.87333	6.24333	62.6767	3.63667	5.47333	8.18667	5.95	6.3	8.01333	66.4333	6.19	7.62	6.19	6.46333	6.16333	6.22	43.5133	6.49667	7.99
464.968	6.29333	5.85	5.09	6.11	49.53	5.66667	4.45667	4.77667	4.36667	4.77	7.37333	44.3033	6.27333	5.09333	8.84	6.2	6.63667	8.19667	47.42	4.64333	6.12333	4.95	5.16667	5.22667	7.07333	55.64	10.4733	6.02	5.59667	5.71	6.05667	7.27333	63.5	4.19	6.01667	8.1	6.55667	6.46333	8.57	67.2633	6.73	8.12667	6.58	7.02667	6.61667	6.69333	44.38	6.86667	8.28333
465.318	6.09	5.66333	4.85	5.97	49.2667	5.35	4.43	4.67	3.98667	4.59667	7.38	43.45	6.32333	4.66333	8.45667	6.08	6.04333	8.16	47.0633	4.50333	5.53	4.31333	5.14333	5.03333	7.32667	55.3133	10.3933	5.82333	5.93	5.41667	5.91333	7.09	63.17	4.03	5.85	7.76333	6.60667	6.31333	8.63333	67.5733	6.76	7.99333	6.11333	6.40333	6.71667	6.84667	44.7533	6.50333	8.10333
465.668	7.08667	6.35667	5.4	6.61333	50.1467	5.88	5.27667	5.62333	4.85667	5.70667	7.89	44.41	7.28333	5.57333	8.77667	6.65333	6.74	8.88667	47.83	5.09667	6.37333	5.13	5.86333	5.91333	8.57333	55.9633	11.13	6.53	6.54667	6.53	6.48333	7.65	63.7533	4.56333	6.52667	7.66667	6.74	6.25667	8.82333	67.8867	6.70667	7.65333	6.62667	7.04667	6.93333	7.32	44.9467	6.57	8.46333
466.018	6.92333	5.76667	5.01333	5.95667	50.15	5.64667	4.69333	5.04	4.47	5.47667	8	44.95	6.84	5.38	8.72667	6.4	6.09	8.44	47.9867	4.70333	6.21667	4.72	5.25	5.54333	8.1	56.1133	10.9033	6.47667	6.12667	6.17333	6.08667	7.27	64.7733	4.33667	5.93	7.64	7.32	6.65667	9.02333	68.37	6.63333	8.21333	6.78667	7.78333	7.77	7.95	45.1933	7.28667	9.16333
466.368	6.93333	5.87333	4.88667	5.91667	50.2233	5.91333	4.93	5.64667	4.29667	6.16667	8.47333	45.03	7.36667	5.52	8.95333	6.45333	6.26	8.83	48.32	4.74667	6.3	5.18333	5.34667	5.97333	8.08	55.99	11.1633	6.68	6.64333	6.57	5.94	7.48	64.8167	4.97667	6.07333	7.90333	7.09	6.62333	8.90333	67.9633	6.69333	7.99	7.03667	7.84333	7.68333	8.39667	44.5233	7.51333	9.08
466.718	6.70333	5.85333	4.71667	5.34667	49.66	5.66	4.11667	5.31667	4.03333	6.21667	8.42667	44.3933	6.98667	5.34667	8.60667	6.02	6.08333	8.67	47.7433	4.60667	5.84667	4.59667	4.80333	5.46	7.86	55.57	10.7567	6.11333	6.39667	5.91333	5.57333	6.64333	63.97	4.39667	5.88333	8.03	7.62667	6.97667	9.12	67.7067	6.92	8.27667	7.25	8.06667	7.59	8.87333	44.7767	8.13667	9.58
467.068	6.86333	5.91667	4.98	5.71667	50.1267	5.46333	4.02	5.37667	4.57	6.19	8.67667	44.2133	6.76333	5.51667	8.49	6.34	6.28	9.00333	47.5767	4.35	6.55	4.95333	4.48	5.4	7.62	55.2733	10.8367	6.49	5.88667	6.40333	5.59	6.85333	63.85	4.52667	5.64	8.17333	8.07667	7.34	9.4	68.1533	7.09333	8.77667	7.76	8.96	7.83	9.09667	44.9933	8.64667	10.0433
467.418	6.58333	5.49333	4.80667	5.86333	49.9133	5.39667	3.29333	5.01333	3.82667	5.29667	8.42333	44.1833	6.12	4.68667	8.12	6.32	5.97333	9.04	47.6933	4.08667	6.43333	4.63	4.14	5.14	6.93333	55.44	10.69	6.31333	5.58	5.83667	5.39333	6.65333	63.98	4.10333	5.53	7.89	7.87	7.61	9.56667	68.2933	6.95667	8.84667	7.51667	8.66667	7.47667	8.77667	44.8933	8.97	9.92
467.768	6.57333	6.07	5.05667	5.68667	49.6	5.34667	3.71667	5.57667	3.92333	5.31667	8.47	43.8067	6.10333	4.72	8.34667	6.46	6.24667	9.34333	47.9533	4.17	6.61333	4.82667	4.43333	5.43333	7.01	55.8533	10.7767	6.53	5.76667	6.13667	5.64	6.94667	63.5233	4.22333	5.89	8.21	7.34	7.97667	9.90667	68.1067	7.23667	8.97	7.60333	8.88667	7.72667	9.15333	45.5667	8.98667	9.65
468.117	6.11	5.74667	4.64667	5.22	49.64	4.73667	3.36667	4.80667	3.67333	4.32	7.63667	44.0167	6.13667	4.39333	7.77	6.24667	5.95	8.74333	47.82	3.50333	5.96667	4.05	3.87	4.5	6.65667	55.5467	10.7367	6.08667	5.06	5.29667	5.69	6.61	63.49	3.71667	5.45	7.92	7.53	7.60667	9.73333	68.6233	7.01333	8.98667	7.4	8.58667	7.64	8.76	45.94	9.02667	9.54333
468.467	5.86667	5.30667	4.31	5.43667	49.4867	4.79	3.82333	4.91333	3.58	3.81333	7.56	44.5433	5.89333	4.33667	7.63667	5.99667	5.35667	8.19333	47.57	3.14	6.23	4.06333	3.85333	4.58333	6.56667	55.31	10.5733	6.49667	4.34	5.32333	5.69333	6.47333	63.6533	3.67333	5.23	7.68667	7.05333	7.14	9.27	68.3533	6.73	8.41667	6.81	7.98667	7.89333	8.18	45.17	8.12333	8.94667
468.817	5.73	5.10333	4.15	5.34	49.48	5.04	3.99667	5.15333	3.63333	4.27	7.44333	45.6067	6.09	4.19	8.03	5.85333	5.60667	8.02	48.1667	3.25	6.09667	3.93	4.46	4.53333	6.61333	55.9267	10.8567	6.45	4.54	5.33333	5.95667	6.61667	64.1333	3.71667	5.15667	7.52667	7.03333	7.02667	9.23333	68.2767	7.03667	8.36667	6.73333	7.31	7.79	8.13	44.6767	7.77667	8.82
469.166	5.75333	5.16333	4.15667	4.92667	49.5	4.79	4.47667	5.17	3.71667	4.41333	7.49667	45.6033	6.00667	4.74333	7.81	5.47333	5.63333	8.04	47.5133	3.15333	5.97667	4.25	4.74	4.29667	6.71667	55.0933	10.37	6.63	4.58	5.48667	6.07333	6.82333	63.6633	3.96333	4.94667	7.41667	6.94333	6.64333	8.61333	68.48	7.25667	8.2	6.74333	7.31333	7.87667	7.61	45.19	7.60667	8.76
469.516	6.27	5.10333	4.28	5.48	49.7667	4.57667	4.58667	5.47667	3.74333	4.74667	7.17667	46	6.55	4.89	7.94667	5.67333	5.78	8.24667	47.43	3.53333	5.86667	4.50667	4.53333	4.40333	6.9	54.82	10.72	6.97333	4.87333	5.46667	6.02	6.90667	64.17	3.83	5.00667	7.32667	7.19	6.3	8.51333	68.2633	7.47667	8.08667	6.16	6.98	7.33333	7.28	44.7833	7.36333	8.88
469.866	6.52333	5.35	4.58667	5.51333	49.86	4.76333	4.56	5.70667	3.96	5.24667	7.39667	45.6533	6.62	4.65	7.91667	6.05	5.57667	8.23	47.3233	3.66667	6.32667	4.76333	5.02	4.99	7.2	55.0067	10.65	7.01	5.14333	5.62	5.82333	6.74	63.7867	3.52667	5.30667	7.60667	7.19667	6.73	9.38667	68.42	7.81333	8.27	6.7	7.51	7.75	7.54333	45.0867	7.58333	8.92667
470.215	6.40667	5.45	4.59667	5.49	49.9867	4.56	4.07333	5.46333	3.85	5.06333	7.17333	45.32	6.81	4.88333	7.71333	6.51	5.84	8.47333	47.2533	4.16667	5.93333	4.57	4.87667	4.66	7.13	55.3233	10.75	7.02333	5.42	5.77	5.76333	6.55	63.68	3.68	5.17	8.07333	7.71333	6.97667	9.67333	69.2433	7.74667	8.67667	7.51667	8.25	7.34667	7.80333	45.7233	7.84667	9.18333
470.565	6.81	5.83333	4.47333	5.78	50.5333	4.89667	4.02333	5.58	3.63	5.02667	7.36333	45.29	7.07333	5.23333	7.99333	6.49333	6.20333	8.51	47.7333	4.93667	5.86	4.54	5.01	5.06333	7.25667	55.4133	10.8633	7.15	5.68333	6.06667	5.86667	6.58	63.7567	3.88	5.56333	7.88	7.28667	6.23667	9.46	68.75	6.80667	8.18	7.11333	8.07	6.56	7.41667	45.4033	7.74333	8.99
470.914	6.63333	5.63667	4.16	5.74333	50.3333	4.48	3.27333	5.16	3.7	4.91333	7.15333	45.0567	6.97667	4.68333	7.82667	6.46333	5.81	8.21333	48.2767	4.46667	5.15333	3.66667	4.64	4.93	7.09333	55.7767	10.89	6.40667	5.37	5.41333	5.38	5.81667	64.0067	3.68	5.57	8.23667	7.50333	6.36	9.79667	68.61	6.97667	8.72667	7.37667	8.36667	6.88	8.32667	45.25	7.80333	9.02333
471.263	5.89	5.04	3.48333	5.3	50.26	4.37333	2.76667	4.38667	3.44	4.22667	7.18333	44.7033	6.22667	4.35333	7.24333	5.64	4.95333	7.55333	48.14	3.73	4.57333	3	4.27667	4.23667	6.46667	55.4467	10.3667	5.53667	4.85	5.01333	5.14333	5.01667	63.3567	3.48333	4.82	8.20667	7.35333	6.3	9.45	68.9767	6.34333	8.81	8.01667	8.25	6.45333	8.22667	45.4	7.98	8.85
471.613	5.70333	4.72	3.73667	5.30333	50.2433	4.49	2.96	4.32	3.47333	3.98667	7.19333	44.83	5.84	4.55667	7.49667	5.39333	5.09	7.42333	48.5767	3.43	4.72333	2.70667	4.09333	4.01667	6.36333	55.5933	10.6467	5.51667	4.26	5.46333	5.21667	4.98333	63.58	3.57333	4.18	7.86333	7.15667	5.87333	8.34	68.0967	5.62	8.51333	7.20333	7.01	5.76667	7.63333	44.3667	7.63667	8.34333
471.962	5.48	4.29	3.47	4.90667	49.7833	4.13	3.09667	3.97	3.00333	3.92	7.07667	44.4433	5.16333	3.65333	7.42667	4.98333	4.49333	7.09333	48.8033	3.03667	4.7	2.72667	4.05333	4.39	5.74333	55.1933	10.3567	4.97333	3.97333	4.87	4.85333	5.10667	63.5467	3.24	4.36333	7.51	6.25	5.46333	7.56667	67.3533	5.13	7.87	6.54667	6.33333	5.32333	6.79333	43.7933	7.22667	7.46
472.311	4.61	3.82	3.14333	4.53	49.0533	3.64	2.84667	3.39333	2.70667	3.35	6.48333	43.9033	4.6	3.50333	6.49	4.71	3.83333	7.09667	47.77	2.13667	4.28333	2.86333	3.23333	3.95	5.49333	54.4733	10.2367	4.45667	3.88333	4.04333	4.62667	4.52667	62.69	2.58667	3.75	8.32667	6.73667	6.92667	8.22333	67.6033	6.2	8.40333	7.11	6.76	6.42	7.42	44.73	7.73	7.81667
472.661	4.23333	3.32333	2.66333	3.82667	49.07	3.3	2.64333	3.25333	2.54333	2.98667	6.14333	43.9267	4.13667	3.09667	5.92667	4.44667	3.48667	7.01	47.4267	1.78	3.97667	2.34667	3.13	3.36667	5.04667	54.1833	9.71333	4.25	3.72	3.87667	4.49667	4.29667	62.3733	2.01667	3.07	7.46333	5.68333	5.93333	7.54	67.3	5.31667	7.60667	6.57667	5.59667	5.28667	6.33	44.4433	7.04	6.90333
473.01	4.64	3.74	3.17	4.06667	49.4067	3.69	2.99667	3.68333	3.02667	3.68333	6.53333	44.3567	4.42667	3.12333	5.93	5.14	4.10333	7.56333	47.78	2.39333	4.80333	2.70667	3.76333	3.8	5.83333	54.7067	9.82333	4.75333	4.05333	4.07667	5.04333	4.76333	62.6833	2.13667	3.65333	7.6	6.15	6.24667	8.36333	67.29	5.76333	7.95333	6.71667	5.85333	5.97667	6.31	44.8467	7.00667	7.43333
473.359	4.53333	3.47333	3.03333	3.94333	49.0433	3.41667	2.73	3.82667	2.61	3.57	6.28667	44.1067	4.15333	3.27667	6.05	4.87333	4.06333	7.77	47.3833	2.50333	4.45	2.67667	3.48333	3.67667	5.62333	54.6633	9.54667	4.66	4.47333	3.59333	5.09667	4.90333	62.3033	1.93667	3.6	7.92333	6.18667	6.81667	8.75667	68.14	5.92667	7.94333	6.78667	6.24333	6.12333	6.42333	45.6333	6.97333	7.57
473.708	5.19	4.15333	3.66333	4.69	50.32	3.96667	3.57667	4.46333	3.45	4.41333	6.85667	45.0167	5.08	4.20333	6.71667	5.32333	5.34667	8.56333	48.08	3.00667	4.93	3.03333	4.20667	4.05	6.87333	55.1433	10.39	5.54667	5.11	4.47333	6.13	5.29	63.1967	2.49333	3.93667	7.81667	6.58333	7.04667	9.48	68.6933	6.32667	7.89	6.68667	6.11	6.84	6.55667	45.53	7.28667	7.87
474.057	5.83	4.51667	4.19	4.69	50.96	4.57	3.95667	4.75	4.03667	4.93	7.25667	45.36	5.45667	4.18333	7.49333	5.68	5.79333	8.91	48.97	3.21667	5.27	2.89667	4.83667	4.51	7.52	55.7467	10.48	6.25667	5.27333	5.18333	6.48667	5.91	64.07	3.13	4.76	7.69667	6.59333	5.96667	9.34667	68.8533	6.03	7.54667	6.45	6.37	5.83	6.33667	45.0767	6.83333	7.55
474.406	6.18	5.31	4.85	5.84	51.25	5.39333	4.16333	5.19	4.18333	5.54	7.95	45.5967	5.94667	4.88667	8.11667	6.32667	6.3	9.24	49.2733	4.19	5.98333	3.67667	5.08	5.12667	8.08667	56.4233	11.1633	6.84667	5.76667	5.66667	6.92	6.87333	64.7867	3.85	5.61667	7.70667	6.89667	6.43333	9.60333	69.22	5.78667	7.11	6.21667	6.58333	5.88333	6.15667	44.8133	7.04667	7.56333
474.755	6.97667	5.80333	5.34667	6.60667	51.2967	5.83	4.34	5.59	4.44333	5.71333	8.27667	45.59	6.71333	5.62	8.6	6.64667	6.97333	9.88667	49.27	4.75333	6.27333	4.36	5.44667	5.64	8.70667	56.33	11.58	7.63	6.38333	6.56667	6.99667	7.57667	65.2467	4.61333	6.00333	7.33333	6.51333	6.11333	8.77667	68.5033	5.29667	6.46667	5.87333	6.27333	5.44333	6.10667	43.9	6.93667	7.24333
475.104	7.42667	6.59333	5.65	7.05667	51.4667	6.27667	4.81	5.94667	4.87667	6.50333	9.02	46.3567	7.23	5.86333	8.86333	7.52	7.38667	10.19	49.5967	5.48333	6.76	4.76333	6.18667	6.06667	9.46	56.4733	11.9567	7.91	6.74	7.09667	7.44333	7.97	66.0667	5.23	6.77333	7.33667	6.28667	6.17	8.95333	68.27	5.84333	6.81667	5.99333	6.53333	5.62	6.52	43.5567	6.96	7.74667
475.453	7.19667	6.67333	6.02333	7.14	51.5133	6.68	4.57667	6.10667	4.77	6.57	9.29333	46.4667	7.28333	6.10333	8.98667	7.47667	7.01	10.1533	50.0367	5.39	6.95667	4.82333	5.74667	6.23333	9.42333	56.7267	11.9867	8.16	6.92333	6.99	7.33667	8.01667	66.2667	5.20667	6.81333	7.04667	5.72667	5.85667	8.42667	68.2133	5.47333	6.61667	5.72333	6.53	4.88333	6.47667	43.9433	6.62	7.41
475.802	7.30667	6.71333	6.03333	7.47333	51.2567	6.44	4.69	6.13667	4.57667	6.47	9.29	46.4367	7.35667	6.16333	8.75667	7.29333	7.16333	10.2533	49.8367	5.47667	6.78333	4.97	5.65333	6.03	9.31667	56.9467	11.6733	7.71	6.66667	6.87	7.26	7.89333	66.0833	4.84333	6.59333	6.43333	5.13	6.05333	7.68667	67.91	4.91667	6.84	5.58667	5.57	5.46	6.4	43.7233	6.50667	7.24
476.15	7.38333	6.83	6.28333	7.07333	51.28	6.31667	5.24333	6.32333	4.80667	6.58	9.08667	46.2633	7.52333	6.23	8.93667	7.52	7.46333	10.1167	49.6333	5.35333	7.07333	4.99	5.71667	6.35	9.63333	56.0067	12.0467	7.79667	6.71333	7.23333	7.48	7.65333	65.6967	4.75333	6.36	6.37333	4.55667	5.48667	7.11667	67.3133	5.14333	6.89333	5.37667	5.27667	5.66333	6.18333	43.7033	5.89333	7.2
476.499	6.89	6.62	6.18333	6.73667	50.88	6.11667	5.11333	6.03333	4.49667	6.50667	8.96	46.3267	7.10333	6.04	8.94333	7.13	7.21	9.59	49.36	4.75333	6.54667	4.48667	5.36667	5.93	9.11	55.9167	12.0133	7.06333	6.31333	6.68	7.29	7.23	65.4	3.99667	5.99667	7.05	4.96	6.23333	7.70667	67.93	5.76	7.69333	6.25333	5.92667	6.36333	6.59333	44.4967	6.62	7.51667
476.848	6.65	6.24	5.93667	6.29667	50.8233	5.80333	4.90667	5.50667	4.34333	5.81667	8.68333	45.96	6.93333	5.45667	8.56	6.29667	6.87	9.14333	49.0567	4.07	6.43667	4.28	4.86667	5.74333	8.59667	55.6167	11.6867	6.82	5.87	6.43333	6.97	6.68333	64.6567	3.73333	5.64333	7.39	5.60667	6.12667	7.67333	68.1433	5.9	7.56	6.59333	6.22333	6.60667	6.70333	44.8667	7.14	7.45333
477.197	6.49	5.72333	5.23333	5.81667	50.5567	5.26333	4.17333	4.80667	3.94	5.51667	8.01	46.3367	6.52333	4.59667	7.79667	5.79	6.59	8.89333	48.56	3.66333	5.74667	3.90333	4.8	5.18	8.03667	55.8267	11.19	6.08667	5.48	5.97333	6.38333	6.17333	64.7067	3.19667	5.07667	8.05667	6.18	6.3	8.06	68.0167	6.4	7.90667	7.09333	6.45333	6.88	7.21667	44.91	7.52333	7.89333
477.545	6.20667	5.94333	5.03	5.80667	50.5467	5.24333	3.92667	4.76667	3.75	5.32	8.17333	46.41	6.54333	4.33667	7.70667	6.05667	6.36667	8.49333	48.54	3.53	5.7	4.17	4.91333	5.32667	7.76667	55.7233	11.3367	5.96	5.81333	5.84	6.41333	6.01333	65.0467	3.41	4.93	8.36667	6.37	6.38333	8.54667	68.1533	6.70667	7.83667	7.47	7.29	6.68667	7.24667	45.3267	7.71	7.91
477.894	5.96333	5.64	4.44333	5.83667	50.49	5.08	3.29333	4.37333	3.39667	5.03333	8.13	46.4533	6.04667	4.04	7.47333	5.36	5.92667	7.97667	48.7467	3.06	5.28333	3.99667	4.47667	4.81667	7.20333	56.3067	10.63	5.64667	5.44667	5.42	6.15333	5.68	64.8933	2.93333	4.72667	8.81333	7.11333	7.03	8.95667	68.4867	6.95	8.08667	7.84	7.69667	6.54	7.74333	45.13	8.6	8.44333
478.242	5.94	5.64	4.19667	5.77	51.2267	5.35	3.55667	4.63667	3.49333	5.07667	7.87333	46.76	5.94	3.82333	7.51	5.02667	5.63333	7.89	49.3367	2.98	5.24	3.93333	4.46333	5.16667	7.12667	56.5033	10.48	6.01	5.22333	5.43	6.23333	5.78333	64.9067	3.03667	5.09	8.12	6.56333	6.04333	8.28	68.7433	6.35	7.37667	6.69667	6.89667	5.47333	7.23	45.0967	7.95	7.95
478.591	5.63	5.39333	3.56667	5.42333	51.1433	5.31	2.99333	3.93333	2.83	4.78667	7.29667	46.84	5.13333	3.32667	6.99667	4.85333	5.06	7.75667	49.04	2.62667	4.70333	3.54333	4.03667	4.81667	6.58333	56.47	9.85667	5.61	4.94	4.78667	5.82667	5.36667	65.2067	2.36333	4.85333	7.67333	6.21667	5.68333	8.02	68.75	5.79	7.34	6.51667	6.52667	5.3	6.94	45.2867	7.08333	7.61
478.939	5.75667	6.02	3.88	5.74333	50.7967	5.34667	3.39333	4.31333	2.98333	5.15	7.67333	46.24	5.34	3.77	7.57333	5.14	5.33	7.85	49.1667	2.96333	5.16	4.21	4.05333	5.19	6.93	55.95	9.80667	5.74	5.19333	5.34667	6.11	6.16667	64.79	2.70667	5.21333	7.25667	5.64	5.44	7.71333	69.6167	5.56	7.17333	6.31	6.46667	5.30667	6.85667	45.3967	6.74	7.02667
479.288	6.10667	6.12667	4.3	5.91667	51.0333	5.6	3.54333	4.74333	3.36	5.47333	7.93	46.4033	5.46333	3.88333	8.07	5.28	5.59	8.31333	49.4133	3.36333	5.73667	4.38	4.32333	5.43667	6.88667	56.17	10.1533	6.16333	5.47	5.68333	5.95	6.93667	64.5967	3.01333	5.36333	7.57667	5.89667	5.42	7.67	69.28	6.08667	7.54667	6.25333	6.35	5.73333	7.25667	45.2933	7.12667	7.70333
479.636	6.50667	6.67333	4.83667	6.16	50.6933	5.96333	4.42667	5.45667	3.94333	5.90667	8.30333	46.3533	6.09333	4.29333	8.33	6.04	6.05333	9.03	49.4833	3.92667	6.33333	5.03333	5.09	5.94333	7.40667	56.05	10.6767	6.60667	5.84333	6.04	6.29	7.17667	64.8833	3.73667	5.95667	7.42667	5.42667	5.07	7.56333	69.06	6.02	7.39667	6.13	6.14	5.97667	7.02	45.11	6.65333	7.38333
479.985	6.64667	6.71	5.07333	6.21333	50.5633	5.76667	4.22333	5.46333	4.20333	5.70667	8.55333	46.0933	6.57	4.63667	8.29	6.48	6.32667	9.27	49.0367	4.24667	6.85333	5.41	5.26667	5.60333	7.27333	55.9567	10.8133	6.39667	5.99	6.03333	6.32667	7.04	65.2167	3.97667	5.52333	7.79667	6.27	5.78667	8.02	68.9333	6.55333	7.95	6.81333	6.85333	6.51667	7.35	45.32	6.97667	7.99
480.333	7.15667	7.17333	5.67333	7.00667	50.95	6.16667	4.72333	6.11667	4.83	6.41333	8.96667	46.3733	7.49333	5.62	8.95667	7.05	7.23667	9.66333	49.8033	4.93	7.32333	6.13	5.8	6.22	7.84333	56.5633	11.5233	7.16333	6.66667	7	6.94667	7.55333	65.5933	4.62	5.75	7.73333	6.44	5.96333	8.09	68.42	6.51667	7.83333	6.81667	6.97333	6.35667	7.43667	45.16	7.62667	8.16667
480.681	7.37	6.88333	5.62667	6.79667	51.35	6.26667	4.67667	6.21	5.19333	6.34667	8.64333	46.7333	7.43333	5.78333	8.97333	7.35333	7.14	9.66	49.64	4.83667	7.51	5.70333	5.98667	6.21	7.83333	56.86	11.7967	7.33	6.75667	6.76333	6.95667	7.26667	65.4667	4.76	5.87	7.72667	6.70667	6.17	8.24667	68.0933	6.46333	7.89	6.69667	6.7	6.14333	7.11333	44.9367	7.50333	8.70333
481.029	7.23	6.76333	5.48333	6.78	51.4067	6.01333	4.96667	5.90333	5.14333	6.34333	8.38667	46.82	7.21333	6.07333	8.93333	7.3	7.17667	9.38333	49.6433	4.79	7.33667	5.68	5.72	5.94667	8.15	57.0267	11.8767	7.27667	6.52	6.54	7.07333	7.01333	65.44	4.60333	5.96667	7.29333	6.30333	5.88667	8.09	68.6933	5.59667	7.32	6.55	6.13333	5.53	6.76333	44.62	6.96	8.07333
481.377	6.75333	6.10667	5.12333	6.34333	51.5	5.41333	4.26	5.27667	4.54	5.69333	7.74333	46.8767	6.68333	5.56333	8.69667	6.73333	6.77333	8.86	49.37	4.48667	6.65667	5	5.05667	5.32	7.65667	56.94	11.7067	7.04	6.22	6.08	6.45333	6.83333	65.3067	3.87667	5.44667	7.22	6.63	6.06667	8.34333	69.1567	5.54	7.46667	6.64	6.07667	5.48667	7.11	45.5233	7.13	8.28
481.726	6.59	6.09667	4.89667	6.19	51.4833	5.28333	4.31667	5	4.32333	5.68	7.59	46.8567	6.35	5.51667	8.56	6.70333	6.69	8.76333	49.4733	4.34667	6.50333	4.88	4.90333	5.17667	7.77667	56.8433	11.84	7.00667	6.13	5.80667	6.47	6.77	65.0367	3.87333	5.70333	6.77	5.81	5.29333	7.89	68.9933	4.97333	6.97667	6.10667	5.32667	5.17333	6.66333	45.2533	6.67333	7.42333
482.074	5.95333	5.42	4.41333	5.64333	51.2667	4.62	4.00333	4.68	3.93	4.88	7.24333	46.3167	5.74	4.8	8.02	5.97667	5.85667	8.36667	48.8267	3.56333	6.04333	4.42333	4.52667	4.55333	7.38333	56.49	11.4433	6.68667	5.42	5.16333	5.85667	6.44667	64.44	3.42333	5.33333	6.56	5.18333	4.99333	7.95333	69.2133	5.21667	6.82333	5.78333	5.23	4.98	6.42	45.0267	6.15	7.00667
482.422	5.86333	5.36667	4.25	5.86667	51.4	4.60667	3.92667	4.75	3.7	4.59333	7.49	46.2433	5.65667	4.69	8.28333	5.72667	5.70667	8.41333	48.96	3.58	5.81333	4.44	4.50333	4.55333	7.56667	56.7933	11.4733	6.58667	5.24667	5.19333	5.89333	6.38	64.74	3.14667	5.36667	6.63	5.3	4.98333	8.25667	68.8033	5.64	7.11	6.12667	5.85667	5.48667	6.64	44.9567	6.65333	6.96667
482.77	6.06	5.24333	4.25333	5.77667	51.37	4.69333	3.43667	4.82	3.97	4.34333	7.25667	45.7867	5.61333	4.37	8.01667	5.57667	5.38333	8.21333	48.8933	3.40333	5.70333	4.35667	4.56667	4.5	7.29	56.4433	11.1667	6.51667	4.99	5.21	5.54	6.14667	64.39	2.85667	5.39667	6.54667	5.3	4.96667	8.09333	68.62	5.85	7.08667	5.90333	6.13	5.43333	6.43333	45.15	6.48333	6.79333
483.118	6.34333	5.78333	4.36667	5.79333	51.4533	5.18	3.77	5.10667	4.35333	4.84667	7.65	46.34	6.04667	4.66	8.14667	6.08667	5.51333	8.46	49.3333	3.79333	6.25667	4.66	4.98333	4.81333	7.7	57.0433	11.3	6.69333	5.47333	5.44667	5.98667	6.42	64.93	3.18333	5.63667	6.85333	5.62333	5.30667	8.21667	69.0267	6.06667	7.44667	6.25	6.81667	5.75	6.48	45.38	6.59	6.85333
483.466	6.09	5.64333	4.05667	5.66667	51.3133	5.06	3.44667	5.09667	4.14333	5.04	7.39	46.3033	5.73	4.08667	8.23	5.96667	5.38	8.23333	49.26	3.73	5.98667	4.40667	4.81667	4.93	7.43	57.3067	10.9567	6.47667	5.41	5.22333	5.76333	6.47	65.1	2.75667	5.23333	7.09333	5.84	5.62333	8.42667	69.13	6.46	7.77333	6.36667	7.07667	6.05	6.83333	45.52	6.70333	7.33667
483.813	5.92	5.67667	4.08	5.9	51.06	5.20667	3.45667	5.12	4.45333	5.12667	7.22667	46.33	5.57667	4.34333	8.53667	6.47333	5.63333	8.1	49.0933	4.01	5.83667	4.47333	4.80667	5.05667	7.42333	57.1033	10.94	6.14667	5.73	5.08	5.9	6.62667	64.8933	2.84	5.37	7.46333	6.24333	5.75667	8.32	68.9533	6.38	7.89667	6.43333	7.22	6.12	7.18	45.6367	6.75667	7.74333
484.161	5.64	5.72667	4.03667	5.60333	50.71	5.04667	3.46	4.89333	4.43	5.06	7.17	46.0533	5.46333	4.3	8.22333	6.34	5.69	7.90333	48.8367	3.84333	5.78	4.53333	4.74667	4.93333	7.14667	56.6633	10.89	5.95333	5.56	5.30667	5.69333	6.57333	64.2267	2.88333	4.91333	7.72667	6.30667	5.89	8.29333	69.21	6.44333	8.12667	6.56333	7.08333	6.13333	7.34	45.94	6.58333	7.63
484.509	5.49	5.5	3.99	5.54333	50.7867	5.10667	3.60667	4.88333	4.27	5.35333	7.26	46.2733	5.48	4.70333	8.42333	6.31333	6.08667	8.11	48.9767	3.87667	5.85	4.60333	4.97333	4.98667	7.4	56.6967	10.9667	5.87333	5.76	5.44667	6.14667	6.44333	64.6133	3.1	4.41333	7.67333	6.25667	6.18667	8.47667	69.0733	6.29333	8.04	6.41	7.23	6.25667	7.44667	45.95	6.66	7.66667
484.857	5.46667	5.19667	4.26667	5.70333	51.0667	5.02667	3.71	4.75333	4.27333	5.21667	7.24333	45.7767	5.40333	4.57667	8.44	6.12	6.19333	8.17667	48.6633	3.62333	5.79	4.72667	5.07333	5.13333	7.40333	56.5167	10.88	5.70667	5.66333	5.45667	6.12333	6.37333	64.15	3.24	4.21667	7.44667	5.92667	5.67667	8.39	69.0967	6.10667	7.79	6.10667	6.67	5.96	7.11	45.6267	6.63	7.51
485.205	6.06333	5.43	4.76667	6.25	51.2933	5.23333	4.24667	4.99667	4.87333	5.24333	7.57667	46.0333	5.89333	5.10667	8.65667	6.39333	6.61667	8.57	49.0567	4.05667	6.15	5.16333	5.50333	5.38333	8.08333	56.2067	11.22	6.38	6.05	6.18	6.40333	6.77667	63.9867	3.72333	4.63333	6.85	5.28	5.08667	7.87667	68.9433	5.50333	7.06	5.71667	6.42	5.47333	6.46	45.2133	6.21333	6.81
485.552	6.8	5.87	5.08	6.24667	51.7833	5.47667	4.76667	5.39667	5.02667	5.75667	8	46.4333	6.40333	5.28667	8.88333	6.33333	6.94	8.77667	49.63	4.41667	6.53333	5.29667	5.67333	5.70333	8.31	56.3633	11.3467	6.75333	6.23	6.65	6.65333	6.99	64.4133	3.99667	4.89333	6.42667	5.43	5.23	7.91	69.0367	5.55333	6.9	5.58667	6.36667	5.69	6.51	45.02	6.27333	6.69333
485.9	6.97333	6.00333	5.26	6.64333	52	5.42333	4.97333	5.59667	5.21	5.75667	8.18	46.68	6.65	5.26	8.82667	6.60667	7.11	9.01	49.8067	4.49333	6.56667	5.62	5.75	5.91667	8.42	56.5033	11.24	6.89333	6.42333	6.79333	6.90667	7.17667	64.8967	4.11333	5.09	6.14	5.22333	5.25333	7.84333	68.9033	5.32333	6.71	5.35333	6.16667	5.25	6.46333	44.86	6.43	6.85333
486.247	6.97333	6.11333	5.39667	6.86333	51.9733	5.30667	4.99333	5.55	5.17333	5.56333	8.36333	46.5033	6.78	5.20333	8.51	6.62	6.87667	9.03667	49.7133	4.45	6.49	5.47333	5.59	5.86333	8.44333	56.5833	11.2767	6.92333	6.24333	6.81	6.57333	7.29	64.89	3.93333	5.31333	6.54	5.61	5.32667	8.20333	69.02	5.85333	7.17333	5.63333	6.40333	5.59	6.68667	45.0767	6.68333	7.14333
486.595	6.94667	6.05667	5.17333	6.75667	52.33	4.91667	4.72667	5.51667	5.17	5.64333	8.38333	46.7867	6.80667	5.32667	8.37667	6.76667	6.87	9.16667	50.1567	4.44	6.11333	5.26667	5.54333	5.82333	8.33	56.75	11.18	7.09667	6.07333	6.79	6.62333	7.45	65.2533	3.82	5.50667	6.79333	5.72667	5.90333	8.86333	68.5133	6.17	7.54	5.72	6.49667	5.94667	7.10333	45.0633	6.8	7.48667
486.942	6.46333	5.78	4.81	6.53	52.0967	4.75667	4.48667	5.17667	4.72667	5.48	8.38333	46.5833	6.66333	5.25667	7.97333	6.47667	6.52	8.98333	49.8467	4.06	5.74667	4.88	4.93667	5.64	7.91	56.7033	10.9233	6.60333	5.82667	6.35667	6.35333	7.16	65.1633	3.72333	5.14	7.68	6.41667	6.48667	9.53333	68.8433	6.98667	8.28667	6.3	6.89333	6.33	7.71333	45.2333	7.48	8.25667
487.29	6.33667	5.72	4.98667	6.87	52.0633	4.86	4.46	5.22	4.80333	5.37667	8.4	46.47	6.87	5.46333	7.90333	6.41333	6.67	9.09333	49.85	4.16333	5.82333	5.19667	5.37667	6.04333	8.06333	56.91	11.0833	6.75333	6.03667	6.35667	6.30667	7.15	65.1567	3.90667	5.08667	8.2	6.07	6.30333	9.68	68.7333	6.74667	8.68333	6.56	6.95667	6.26	7.53	45.3467	7.62	8.07333
487.637	6.67667	5.82333	4.96	6.67667	51.9867	5.28333	4.25333	5.13667	4.95667	5.61667	8.39	46.73	6.9	5.45333	8.08667	6.31667	6.7	9.22	49.9333	4.31333	6.08333	5.12333	5.35667	5.85333	8.21667	57.27	11.2333	7.03	6.10333	6.22667	6.35667	7.03667	65.0867	3.9	5.19333	8.61333	6.43	6.41667	9.88333	69.1233	6.83	8.96333	6.93	7.34333	6.77333	7.72	45.4833	7.74	8.15333
487.985	6.8	5.88333	4.93667	6.69667	52.0967	5.36333	4.34	5.14667	4.87	5.68333	8.26	47.4367	6.87333	5.34333	8.10667	6.47	6.80333	9.15667	50.2733	4.44667	6.02	5.07667	5.34667	6.14333	8.22667	57.4733	11.01	7.17	6.31333	6.31667	6.55333	6.93667	65.04	3.91333	5.33333	8.56	6.47667	6.39667	9.64	69.5733	6.59	8.84333	6.97667	7.37333	6.58	7.72333	45.75	7.71333	8.08667
488.332	6.82667	5.93667	4.78667	6.85333	51.8767	5.63333	4.4	5.23667	4.70333	5.63	8.12333	47.2067	6.78333	5.15333	8.31667	6.26	6.68667	8.85	50.1233	4.55	6.15667	5.31333	5.24667	5.94667	8.15333	57.16	11.1967	7.22333	6.23333	6.33667	6.55	6.71667	64.9333	4.08	5.33667	8.15333	6.42	6.01333	9.01333	69.98	6.34667	8.68333	7.01667	7.39	6.29	7.67	45.8267	7.53333	7.73
488.679	6.94333	5.92	4.99667	6.56667	51.7367	5.58	4.25	5.33667	4.71333	5.62333	7.81	47.3433	6.85	5.17333	8.25	6.46333	6.70333	8.66333	50.07	4.71333	6.45667	5.38	5.54333	6.04	8.23333	57.32	11.2833	7.44667	6.11667	6.62667	6.71333	6.68333	64.7267	4.05333	5.46667	7.63	5.91	5.67333	8.51333	70.2167	5.71	7.97667	6.62	6.97	5.88333	7.33333	45.95	7.05333	7.33
489.027	6.75667	6.05333	4.78	6.18	51.8533	5.45667	3.95667	5.09	4.48667	5.68667	7.90667	47.4467	6.6	4.83333	8.26333	6.73667	6.54	8.52333	50.3233	4.34667	6.38667	4.92333	5.14	5.52	8.20667	57.6333	11.1833	7.26667	5.77	6.61333	6.65	6.61	65.0667	3.95	5.48333	7.69	6.31	6.00667	8.63	70.8333	6.04	8.14667	6.78333	7.12667	6.09	7.51	46.3567	7.42333	7.82
489.374	6.6	6.15333	4.83667	6.37333	52.17	5.34	4.32	5.39	4.38	5.61667	7.95667	47.4833	6.71667	5.09	8.21333	6.83667	6.54333	8.58	50.7	4.21333	6.55333	5.03333	5.35667	5.79333	8.06333	57.5033	11.3	7.13333	5.57667	6.52	6.74333	6.71	65.19	4.14667	5.51333	7.56667	6.03667	5.82667	8.29333	70.8067	5.92	7.89667	6.30667	6.67333	6.08	7.29	46.3733	7.05	7.74333
489.721	6.53333	6.36667	4.98333	6.29	52.3267	5.22333	4.26667	5.41	4.38	5.63333	7.97	47.1367	6.83333	5.19333	8.35667	6.69333	6.69	8.83	50.7067	4.22	6.76667	5.20333	5.37667	5.75667	8.00667	57.49	11.89	7.14667	5.64	6.47333	6.86	6.85667	65.38	4.49667	5.5	7.51	6.21	5.49	8.42667	70.4167	5.75667	7.58667	6.48	6.52333	5.94	7.20333	45.9933	7.03667	7.64667
490.068	6.87667	6.51	5.53667	6.58667	52.22	5.61667	4.47333	5.73667	4.92	5.81667	8.30667	47.35	7.14	5.73	8.59	7.02667	7.16	9.18667	50.6667	4.42	7.24333	5.46667	5.70667	6.61	8.48333	57.8133	12.1167	7.45	6.09667	6.68667	7.12333	7.27	65.0233	4.80333	5.88333	7.74333	5.98	5.24	8.00667	70.0367	5.58	7.10667	6.11333	6.23667	5.77	6.86667	45.6533	6.95333	7.46333
490.415	6.70667	6.69	5.16	6.62667	52.22	5.56333	4.24667	5.66333	4.72	5.73333	8.32667	47.1833	6.86667	5.19667	8.75667	6.60667	6.95667	9.18333	50.9067	4.05667	6.80333	5.30667	5.60333	6.08	8.32	58.0567	12.0233	7.21	5.94333	6.51667	7.04	7.08333	65.4267	4.70667	5.86667	8.21667	6.82	5.77667	8.48	69.31	6.17	7.97333	6.62667	6.89667	6.48	7.34333	45.7167	7.44	7.68667
490.762	6.68333	6.72333	5.34667	6.91	51.8067	5.50333	4.04667	5.87	4.83	5.69	8.17333	46.9633	7.02667	5.44667	8.49667	6.42333	6.98333	9.44333	50.7233	4.26	6.97	5.36333	5.63333	6.07	8.20333	57.56	12.0433	7.23667	5.94333	6.52333	7.04333	7.15	64.9267	4.84667	5.92667	8.12667	6.57333	5.56333	8.10333	68.9333	6.11333	7.53	6.29333	6.59333	6.10333	7.19667	45.32	6.96333	7.38333
491.109	6.38667	6.18667	5.15667	6.54333	51.5	5.23667	3.59	5.31333	4.41	5.43333	7.82333	46.47	6.75	5.20333	8.32333	6.29	6.59333	9.26	50.4667	3.93333	6.36	4.86	5.07	5.73667	8.12	57.0533	11.6	6.96667	5.84667	6.22	6.64333	6.85333	64.87	4.41667	5.56667	7.87	6.64	5.58667	8.17667	68.8733	6.16667	7.48667	6.42667	6.66333	5.86667	7.14	45.4967	7.01667	7.19333
491.456	6.30333	5.90667	4.80333	6.64	51.0433	5.42333	3.65667	5.57333	4.54333	5.41	7.81	46.4467	6.50667	5.30667	8.30333	6.58333	6.41667	9.24667	50.2467	3.8	6.34333	4.61	5.01	5.58333	8.20333	57.03	11.4433	7.12	5.86333	6.13667	6.64	6.94333	64.6833	4.25	5.25667	8.44667	6.43333	6.12333	8.16	68.7567	6.67333	7.84333	6.57333	6.85	6.13	7.33333	45.2333	7.35667	7.53667
491.803	5.76667	5.79333	4.27333	6.27667	50.9567	5.03333	3.32333	4.97	3.97	4.99667	7.48667	46.11	6.06	4.89667	7.99667	6.30333	5.71333	9.03333	50.2467	3.23	5.99	4.2	4.52333	4.79333	7.82333	56.7467	11.0833	6.54333	5.37333	5.69333	6.33	6.58	64.8533	3.69	4.77333	8.45333	6.74	6.7	8.72333	69.4	7.00667	8.41667	7.02667	7.45333	6.49667	7.62	45.82	7.63333	8.01
492.15	6.19667	6.04	4.70333	6.67333	51.4533	5.42667	3.70333	5.31333	4.54333	5.16333	7.73333	46.5367	6.49667	5.65	8.16667	6.68333	6.29333	9.37	50.2533	3.67	6.53333	4.63333	4.79667	5.34333	8.12333	56.93	11.54	6.68	5.88667	6.01667	6.63667	6.94667	65.34	3.91667	5.22333	7.98667	6.22667	5.94667	8.54	69.9867	6.70333	7.85333	6.47667	7.02667	5.99	7.24	45.6067	7.31667	7.83667
492.497	6.09	5.81	4.41333	6.27667	51.41	5.2	3.80667	5.09	4.40667	4.8	7.70333	46.4433	6.28667	5.34	8.28	6.32	6.06	9.17333	49.85	3.57667	6.45667	4.55	4.84333	5.20333	8.03333	56.6567	11.55	6.72333	5.69667	5.8	6.38	6.9	65.4233	3.38667	4.97667	7.93667	6.57667	6.14667	8.79667	70.22	6.86333	8.16	6.98333	7.12333	6.31	7.56667	45.8167	7.62	8.03333
492.843	5.94667	5.68	4.19667	6.17333	51.3467	5.00333	3.66333	5.05	4.40333	4.85	7.60333	46.4767	6.27667	5.22667	8.05	6.05667	5.93	8.75667	49.6567	3.76667	6.36333	4.48667	4.82333	4.89333	7.53667	56.99	11.7367	6.58667	5.68333	5.65	6.29333	6.6	64.9667	3.02	4.92333	7.73	6.48	5.99	8.98667	70.1067	6.94	8.16333	6.9	7.16333	6.11	7.57333	45.4667	7.67333	8.06667
493.19	5.93	5.93333	4.4	6.35	51.7233	4.84333	3.62333	4.82333	4.31333	5.15333	7.89333	46.8867	6.63333	5.34333	8.26667	6.15	6.26667	8.83	49.72	4.00667	6.51333	4.87333	4.98333	5.11333	7.74	56.9433	11.6967	6.78	5.78333	5.79	6.36	6.69333	65.08	3.37333	5.49667	7.21	6.35667	5.64	8.73667	70.53	6.46	8.00333	6.55667	6.89333	6.04667	7.17	46.0267	7.25667	7.72667
493.537	6.15	6.01	4.29667	6.43333	51.9033	4.96667	3.62	4.99333	4.40333	5.43333	7.71667	46.93	6.82333	5.50667	8.1	6.35333	6.51333	8.94333	49.6633	4.43333	6.61667	4.8	5.25667	5.16333	7.61667	57.0233	11.9633	6.87	5.65	5.92333	6.23667	6.67	65.0067	3.42667	5.41667	7.43	6.70333	5.71667	9.08333	70.33	6.64333	8.06333	6.87333	7.10333	6.27333	7.61667	45.9533	7.51	7.84
493.883	5.84333	5.67	4.25333	6.06667	51.32	4.66667	3.47	4.63	4.00333	5.32	7.48333	46.2533	6.47667	4.98333	7.75667	6.26	6.1	8.67667	49.44	4.17667	6.24333	4.33667	5.15	5.08667	7.29	56.55	11.7833	6.91667	5.26	5.54667	5.87	6.38667	64.1767	3.2	5.04667	7.60333	6.62667	6.22333	8.85333	70.1733	6.6	8.10667	7.15333	7.00667	6.36333	7.65667	46.1433	7.21333	7.92
494.23	6.32	6.1	4.54667	6.71667	52.0033	5.23667	3.73333	5.08	4.26	5.91667	7.66333	46.67	6.77333	5.48	8.20333	6.96333	6.51	9.10667	49.96	4.36	6.52	4.71	5.43	5.58333	7.79333	57.4433	12.1767	7.14333	5.74	5.8	6.40667	6.84	64.5933	3.87667	5.49667	7.19333	6.17667	5.95	8.49667	69.9667	6.15667	7.78333	6.52333	6.95667	5.83333	7.27	45.8167	6.86	7.42333
494.577	6.89667	6.41333	5.06333	7.02	52.07	5.50667	4.23667	5.39333	4.46667	6.33667	8.06333	46.6567	6.98333	5.62	8.54	7.29	7.04	9.51	50.12	4.69333	7.17	5.01	6.14333	5.90667	8.54	57.38	12.4467	7.73667	6.18333	6.25333	6.78667	7.34	64.9	4.5	6.02667	7.79	6.51667	6.35333	8.53333	70.3267	6.38667	8.09667	6.9	7.40333	6.24	7.60667	46.21	7.13667	7.72
494.923	6.85667	6.42	4.94	6.89	51.81	5.56667	4.30333	5.43333	4.47667	6.18667	7.71667	46.3133	6.79	5.18	8.39	6.85667	6.53667	9.03333	49.9533	4.49333	7.08	4.84333	5.98667	5.62667	8.12667	57.2633	12.4733	7.41	5.86	5.93667	6.7	6.93	64.6933	3.98	5.68333	7.94667	6.57333	6.65333	9.1	70.2233	6.58667	8.28667	6.95	7.64	6.49	8.15667	45.8533	7.46	7.96667
495.27	7.02333	6.48667	5.29	7.10333	51.3033	5.6	4.70667	5.71667	4.49333	6.07667	7.66667	46.27	6.89333	5.13667	8.47667	6.98	6.62333	9.16333	50.0767	4.62333	7.01333	5.11667	5.95667	5.76667	8.11	56.9833	12.5433	7.58333	6.14333	6.05667	6.82	7.18	64.6933	4.05333	5.81	7.93	6.1	6.23333	8.71667	69.9433	6.28	7.80333	6.71333	7.39667	5.99667	7.70667	45.6167	7.17667	7.63
495.616	6.99	6.35333	5.20667	7.18667	51.4333	5.72333	4.6	5.79	4.41667	6.07	7.51	46.52	6.92667	5.06	8.5	6.83333	6.61667	9.27667	50.24	4.73	7.36667	5.28	5.99667	5.61667	8.22667	57.0967	12.48	7.74	6.17667	6.16	6.82667	7.14333	64.7533	4.05333	5.85	8.17	6.56667	6.55	9.09333	69.8233	6.5	8.05	6.69333	7.72333	6.20667	7.84333	45.33	7.73	7.79667
495.962	6.83333	6.14333	5.25333	6.78667	50.9167	5.41667	4.64667	5.64	4.43	5.78667	7.41333	46.58	6.97	4.85333	8.39333	6.89667	6.49	9.23333	49.8867	4.91	7.44333	5.27333	5.84333	5.46	8.09	56.6933	12.5867	7.67667	6.26667	6.27	6.76	6.91333	64.3467	3.78333	5.53333	8.63667	6.51	6.45667	9.39667	70.1867	6.63667	8.2	6.76333	7.61667	6.36	7.98	45.7567	7.99667	7.85333
496.309	6.56	6.16667	4.92	6.64667	50.71	5.39	4.39333	5.58333	4.43333	5.37667	7.32333	46.77	6.88667	4.85	8.28333	6.83333	6.39333	8.88667	49.68	4.61667	7.14333	5.22	5.54	5.64667	7.92667	56.53	12.5467	7.45333	6.04	6.13	6.68333	6.75667	64.36	3.74	5.3	8.43667	6.37333	6.41	9.21667	70.1833	6.65333	8.03667	6.47333	7.44333	6.16	8.04333	45.7667	7.87667	7.85
496.655	6.58333	5.88333	4.69	6.19	50.7933	5.10667	3.99	5.22333	4.27333	5.06667	7.37	46.71	6.90333	4.85333	8.19667	6.93667	6.3	8.90333	49.6467	4.75333	7.03667	4.89	5.42333	5.48	7.80333	56.6333	12.33	7.52	5.88333	6.17333	6.27	6.83667	64.64	3.70667	5.16667	8.14	6.12	6.37333	8.67333	70.1233	6.64	7.66333	6.31667	7.22667	5.73333	7.61333	45.97	7.5	7.71667
497.001	6.38333	5.68667	4.66667	5.73333	51.1567	4.99333	3.6	4.87	4.09	5.16667	7.52	47.0733	6.81	4.91333	8.00333	6.65667	6.25667	8.8	49.6867	4.63	7.02333	4.63667	5.20667	5.51	7.89667	57.1167	12.23	7.43667	5.83333	6.08	5.94667	6.76333	64.88	3.65333	5.15667	8.05	6.28	6.56	8.48333	70.3667	6.85667	8.01	6.36333	6.98667	5.72667	7.81	46.2833	7.59333	7.76667
497.347	6.31667	5.88333	4.60333	5.77333	51.47	4.95	3.69	4.76	4.27	5.12667	7.72	47.2133	7.15333	5.30667	8.03333	6.78	6.50667	8.67333	49.8667	4.64333	7.16333	4.48333	5.12	5.73333	7.94	57.3333	12.39	7.53	5.70333	6.05333	6.09	7.00333	65.5367	3.87333	5.00667	7.63333	5.78667	6.21667	8.34667	70.7533	6.73	7.88667	6.36333	6.69667	5.49667	7.73667	46.5267	7.2	7.48
497.694	6.14333	5.76	4.28	5.57333	51.8533	4.93	3.39	4.53	4.11	5.25667	7.68	47.1567	7.01667	5.22333	7.92	6.4	6.32667	8.48333	50.12	4.63	6.85333	4.18	4.87667	5.56667	7.88333	57.7167	12.3133	7.65667	5.20333	5.73	5.97667	6.87	66.02	3.70667	5.01	7.23	5.83	6.31333	8.29333	70.72	6.93667	7.82333	6.33	6.78667	5.81	7.59	46.3467	6.96333	7.70333
498.04	6.06667	5.75	4.32667	5.65333	52.2067	4.98333	3.43667	4.67333	4.25333	5.34333	7.51333	47.0133	6.95	5.16667	7.72667	6.34	6.18333	8.97333	50.18	4.72333	7.06333	4.16333	4.78	5.45	7.73667	57.8333	12.51	7.65667	5.17333	5.82667	5.92	7.05333	65.98	3.77667	4.92667	7.17	5.99333	6.2	8.21667	71.13	6.55	7.74	6.44	6.48	5.85333	7.28333	46.39	6.95	7.49333
498.386	6.37667	6.11333	4.88	6.13333	52.2967	5.78667	3.97667	5.32333	4.58667	5.81333	7.85667	47.2167	7.36333	5.65667	7.93667	6.73667	6.65	9.42	50.7467	4.91333	7.35667	4.75667	4.95333	6.01333	8.04	57.9867	12.9267	7.92333	5.55333	6.13667	6.45667	7.36333	66.1433	4.26667	5.41333	7.3	6.30667	6.25333	8.62333	71.3233	6.82333	8.36333	6.80667	6.58333	6.06	7.60667	46.58	7.19	7.67667
498.732	5.86	5.84667	4.24333	5.94667	52.0667	5.47333	3.67667	4.93333	4.46667	5.50667	7.41	46.6767	7.28333	5.19333	7.61667	6.38	6.17667	8.95333	50.3567	4.52333	7.15	4.52	4.83	5.53	7.57	57.5667	12.8	7.64	5.33	5.61333	6.44667	6.76333	66.02	3.96333	4.95333	7.12	6.26667	6.35667	8.67333	71.1033	6.58	8.18333	6.44667	6.55	6.01667	7.40667	45.9633	6.96667	7.70667
499.078	5.97	5.71667	4.25667	5.67667	51.94	5.37667	3.50667	5.06667	4.19333	5.55333	7.20667	46.6	7.24667	4.87	7.73333	6.57333	5.94	9.14333	50.2933	4.57667	6.9	4.78333	4.90667	5.28333	7.55667	57.66	12.7967	7.54	5.44	5.63	6.33667	6.63	65.79	3.7	5.12667	7.35	6.72333	6.31	8.99	71.0833	6.73333	8.29333	6.49667	6.62667	6.04	7.58667	46.3067	7.43667	7.68333
499.424	6.26667	5.85667	4.47	5.98667	51.7367	5.57333	3.65667	5.16	4.1	5.52	7.16333	46.6167	7.21	5.01333	7.51333	6.65333	6.12	9.33	50.3333	4.57333	6.86667	4.93333	5.03333	5.21667	7.35333	57.6067	13.1033	7.47	5.5	5.87667	6.29667	6.73667	65.67	3.81	5.05333	7.69	7.19	6.74333	9.18667	71.24	6.86	8.38333	7.01	6.97667	6.1	7.66667	46.4433	8.02333	8.12333
499.77	6.47	5.95	4.96333	6.2	51.7567	5.78667	3.79333	5.12	4.29	5.80667	7.78667	46.92	7.52333	5.49333	7.99	7.03667	6.44333	9.41333	50.68	4.99	7.07	5.19	5.47	5.5	7.71	58.0067	13.6733	7.83333	5.85667	6.18333	6.49667	6.77	65.82	4.06333	5.62	7.49667	6.61	6.51333	9.31667	70.8	6.93333	8.26667	6.85333	7.01	5.70667	7.51667	46.46	7.99	8.05
500.116	6.51	5.80667	4.84	6.08667	51.6467	5.55667	3.67667	4.98667	4.16	5.51333	7.61333	46.8767	7.39333	5.35333	7.9	6.79667	6.36667	9.46333	50.4567	4.92	7.06333	5.13	5.54	5.25	7.74333	58.1867	13.7967	7.84667	5.74667	6.06	6.35333	6.68	65.8067	3.82333	5.22667	7.36333	6.42333	6.15333	8.92333	70.1433	6.62333	7.79667	6.28333	6.78667	5.44	7.26667	45.9	7.84667	7.61667
500.461	7.91	6.73667	5.87	6.95	52.5	7.52333	3.28333	6.05	5.17	6.71333	8.74	47.88	7.20333	4.82	8.99	7.74667	7.46	11.5033	52.65	7.07667	6.84667	6.10667	6.64667	6.37333	9.81333	60.4533	14.9967	9.18667	7.64	8.50333	8.11333	7.99	67.9333	5.01	4.89333	8.83333	7.64333	7.85333	8.95333	70.6933	8.61667	9.60333	9.14333	9.64667	7.31333	8.87	47.85	9.89333	9.44333
500.807	7.98667	7.00333	6.18	7.47	52.37	8.08	3.55333	6.14667	5.46667	6.72667	9.16333	48.1633	7.16667	4.97333	9.08667	7.64	7.66667	11.7633	52.9367	7.35333	7.09333	6.05	6.66333	6.94333	9.87	60.63	15.4233	9.19	7.86667	8.68	8.23333	7.93333	68.0467	5.24333	4.87333	8.78333	7.42	8.14667	8.89	70.73	8.78	9.80333	9.32667	9.8	7.37667	9.1	47.64	9.79667	9.52667
501.153	7.79333	7.07	5.98667	7.31667	52.32	7.92333	3.54667	6.04667	5.51667	6.67333	9.27667	48.1667	7.26667	4.97	9.19	7.56333	7.56667	11.64	52.9933	7.34333	7.29667	5.93333	6.54333	7.06	9.93667	60.7	15.39	9.23667	7.98333	8.48	8.25667	7.76667	67.9967	5.09	4.99667	8.44333	7.00333	7.69	8.54333	70.93	8.54	9.58667	8.8	9.37667	7.05	9.10333	47.53	9.27333	8.97
501.499	7.83	7.44667	5.67	7.41667	52.5	8.11333	3.70333	6.07333	5.59667	6.53	9.06333	48.2967	7.42667	4.91333	9.18333	7.47	7.64333	11.5833	53.09	7.17	7.35667	5.78	6.46667	6.9	9.87333	61.0733	15.2267	9.54667	7.74667	8.5	8.36	7.97667	68.36	5.13333	4.63	8.95	7.71	8.4	9.03667	70.9733	9	10.0867	9.40667	9.79667	7.78333	9.50667	47.6467	9.87	9.56667
501.844	7.23	7.14333	5.19333	7.11	52.48	7.92333	3.24333	5.59667	5.12333	6.25	8.61667	48.22	7.09	4.53	8.70667	7.11	7.52	11.2	53.0667	7.13667	6.91333	5.21333	5.82	6.55667	9.64	60.88	14.9767	9.14333	7.33	8.29667	8.06667	7.72333	68.13	4.92	4.42	9.2	8.17	8.65333	9.44	71.0133	9.39333	10.51	9.85667	10.2767	7.95	9.68333	47.71	10.1167	9.91
502.19	6.4	6.56	4.79	6.54333	51.9133	6.39	4.17333	4.92	4.43667	5.29667	8.08	47.5833	7.61667	5.63333	7.97333	6.54333	6.90333	9.3	51.1567	5.4	7.49333	4.45333	4.92333	5.72333	7.91	58.8167	14.2567	8.25333	5.49	6.44667	6.67	6.83	66.0967	4.10333	5.16333	7.90333	6.88	7.17333	9.53667	70.61	7.62333	9.05333	7.28	7.62333	6.57	8.07	46.3467	8.21333	8.15333
502.536	6.37333	6.37667	4.60333	6.44333	52.42	6.24333	4.29667	4.65333	4.35333	5.41	7.84667	47.5133	7.74333	5.79333	7.88667	6.50333	6.88333	9.07	51.2733	5.27	7.52333	4.51	4.98667	5.32	7.97	58.9567	14.0767	8.32	5.20667	6.30667	6.25667	6.79333	66.0667	4.08333	4.76667	8.19333	7.03333	7.23667	9.67667	70.9167	7.74333	9.04	7.22	7.97333	6.84	7.96	46.7333	8.33333	8.49333
502.881	6.34	6.33	4.76	6.54333	52.4567	6.47667	4.31	4.57667	4.50667	5.25	7.98	47.4367	7.83333	5.94667	7.89333	6.51667	7	9.01667	51.27	5.20667	7.67333	4.81667	5.14667	5.48333	8.06	58.58	14.3767	8.71333	5.20667	6.31667	6.25333	6.93	65.8867	4.33667	4.85333	8.31333	7.28667	7.28667	9.87	70.55	8.12333	9.35333	7.36	8.01	6.89667	8.02333	46.4867	8.58667	8.64333
503.227	6.77333	6.6	5.05333	6.79	52.5267	6.91	4.47667	5.03333	4.76	5.61	7.98	47.8233	8.26667	5.96667	7.98667	6.72	7.26	9.27	51.7333	5.68333	7.83667	5.04667	5.29333	5.89333	8.49	58.5333	14.8267	8.82	5.47667	6.59333	6.49	7.06	66.17	4.6	5.12333	7.82	6.87667	6.73333	9.25333	70.0867	7.76333	9.10667	6.74333	7.59	6.33667	7.76333	45.8867	7.93	8.03
503.572	7.16667	6.99667	5.64333	7.06667	52.7633	7.26667	5.14333	5.42667	5.33333	6.06667	8.34333	47.8967	8.58333	6.38	8.58	7.27667	7.57333	9.52	51.9	5.93667	8.69	5.30333	6.09667	6.11333	8.85	58.7833	15.36	9.31333	6.00667	6.89667	6.82667	7.33	66.4833	4.97	5.80333	7.90667	6.79667	6.85	9.05667	70.6333	7.74	9.17667	6.61333	7.46	6.45667	7.92	46.1633	8.04667	8.01
503.917	7.15667	7.25333	5.84667	7.25667	52.7833	7.58333	5.27	5.58	5.53333	6.08667	8.52667	48.27	8.61667	6.38667	8.98667	7.51667	7.85333	10.0367	52.16	6.05333	9.07667	5.36333	6.09667	6.35667	9.03333	59.03	15.77	9.53667	6.10667	7.07667	6.77	7.47	66.7367	5.15667	5.86333	8.01667	6.98	6.61	9.07667	70.6933	7.98667	9.21333	6.86	7.51333	6.39333	7.94	46.0333	8.49333	8.21333
504.263	6.74	7.14	5.6	6.86333	52.1933	7.3	4.95333	5.48667	5.27	5.51333	8.39	48.1867	8.45	6.24	8.65667	7.17667	7.61	9.7	51.3867	5.91333	8.83	5.25	5.78667	6.18	8.75	58.5	15.8233	9.34667	5.84	6.65667	6.82667	7.38333	66.4533	5.05	6.01667	8.03	7.19333	6.9	8.92333	70.5467	8.03333	9.23667	7.03	7.23667	6.4	7.74	45.8933	8.53	8.18667
504.608	6.96667	7.21667	5.89	7.17	52.5467	7.54	5.41333	5.94667	5.43	5.87667	8.37667	48.3633	8.77333	6.49333	9.04333	7.56667	7.86333	10.01	51.6033	6.3	9.05333	5.39667	6.25667	6.44333	9.29333	58.79	16.2367	9.32333	6.16	6.88333	7.04333	7.76667	66.8467	5.61	6.15667	7.94333	7.06333	6.73667	9.04	70.9333	8.06667	9.14333	7.14	7.21	6.5	7.57333	46.4367	8.65333	8.20667
504.953	6.43333	6.77	5.73	6.88	52.2933	7.18333	5.07	5.62	4.93333	5.51	8.37333	47.86	8.56667	6.65	8.89667	7.38333	7.51333	9.81	51.1367	6.16333	8.91333	5.21333	6.13667	6.17667	8.90667	58.1733	16.2967	9.07333	6.15	6.45	6.82	7.6	66.4467	5.31	6.02	7.67	6.76	6.58667	9.01	71.3833	8.14333	8.71	6.94333	6.82333	6.5	7.24333	46.6833	8.64	8.19667
505.299	6.38667	6.79	5.58	6.83	52.76	7.06667	4.71667	5.57333	4.92667	5.25	8.38667	48.2533	8.62	6.56667	8.70667	7.35	7.42333	9.77	51.1033	6.1	8.71	4.97	6.01667	6.38	8.76333	58.2333	16.42	8.95667	6.12667	6.44667	6.81667	7.72333	66.5033	5.16667	5.63	7.40333	6.29667	6.55667	8.86333	71.39	8.00667	8.5	6.92333	6.47	6.21667	7.06667	46.83	8.28667	8.02667
505.644	6.28667	6.59	5.21	6.74333	52.6533	7.15	4.53333	5.40333	4.78333	5.06667	8.10333	48.0333	8.75667	6.41333	8.37	7.14667	7.37667	9.49	50.8967	6.06667	8.57667	4.99333	6.06667	6.05667	8.75	58.2067	16.1433	8.56	6.02	6.02667	6.63	7.52333	66.24	5.07667	5.57333	7.78	6.68667	7.06667	9.37	71.4667	8.37	8.93333	6.88	6.68333	6.53333	7.62	47.0067	8.27667	8.35667
505.989	7.01667	7.03667	5.76333	7.15333	53.2267	7.75333	5.09	6.00333	5.38	5.81667	8.56333	48.41	9.23	6.96667	8.95333	7.79333	7.94333	9.91	51.4033	6.42667	9.18333	5.25	6.45333	6.38667	9.10333	58.5133	16.69	9.15333	6.61	6.8	7.15	8.16	66.6933	5.66333	6.08	8.04333	6.89	7.02	9.44667	71.7167	8.82333	9.30667	7.15667	7.06667	6.93667	8.41667	46.9367	8.54667	8.61
506.334	6.94333	7.04667	5.62333	7.18333	53.18	7.80333	4.86667	5.78333	5.12	5.71	8.68667	48.41	9.35667	6.80667	8.66667	7.57667	7.94	9.79	51.44	6.36333	9.29667	4.97	6.10667	6.12667	8.70667	58.6867	16.3467	9.07333	6.59667	6.8	7.13	7.91667	66.69	5.29333	6.02667	8.34333	6.83	7.53667	9.58667	71.71	9.01667	9.57333	7.19	7.34667	7.12	8.78667	47.0267	8.46667	8.70667
506.679	6.95667	6.85	5.30667	6.98333	53.01	7.85667	4.85	5.57	4.8	5.62333	8.45	48.39	8.99	6.52	8.39333	7.35	7.73	9.63	51.28	6.12667	9.33333	4.90333	5.78667	5.97	8.5	58.9133	15.94	8.96	6.12	6.47	6.67667	7.41	66.8133	5.1	5.58667	8.45667	7.03333	7.34667	9.52333	71.6833	9.04333	9.77333	7.33667	7.58333	7.14333	8.95667	47.12	8.39	8.54667
507.024	6.68667	6.60667	5.15333	6.77667	51.9933	7.66667	4.93333	5.27667	4.33333	5.49667	8.39667	47.77	9.08333	6.53667	8.13667	7.05	7.39	9.52333	51.0233	6.07333	9.27333	5.14667	5.39	5.71667	8.30667	58.5433	15.6267	8.87333	5.95	6.10333	6.26	7.11333	66.2633	5.06	5.3	8.72333	7.58333	7.43	10.06	71.8333	9.63	10.0133	7.56333	7.96333	7.65	9.01	47.04	8.71333	8.86667
507.369	6.60667	6.56667	5.36667	6.68667	51.95	7.46333	5.17	5.38333	4.15667	5.49333	8.41333	47.71	9.09667	6.61333	8.16667	6.71	7.24	9.52333	51.02	6.27667	9.18	5.24667	5.43	5.9	8.19667	58.5867	15.7867	8.96333	6.04667	6.15	6.63	7.03	66.2033	5.13333	5.29	8.02	7.01	6.72	9.24	71.96	9.24333	9.50333	7.10333	7.59	6.91667	8.40333	46.8667	8.29667	7.99667
507.714	5.98667	6.02	4.88	6.29	51.33	7.16667	4.64667	4.71333	3.42667	4.81333	7.88667	47.0667	8.87	6.00333	7.76333	6.35	6.63	9.09	50.9	6.13333	8.72333	4.85333	5.01	5.34667	7.93667	58.45	15.44	8.55333	5.67333	5.38333	6.24333	6.31667	65.5933	4.60333	4.68	8.09667	6.93	6.75	9.48	71.6767	9.47333	9.68	7.00667	7.72	6.77333	8.06	47.1033	8.50667	7.92
508.059	5.64667	5.63333	4.48	5.76	51.0133	6.9	4.17333	4.38667	3.12	4.52333	7.38667	46.82	8.57	5.62	7.57	6.18	5.80667	8.67	50.4833	5.88333	8.41333	4.67667	4.70333	5.05333	7.62	58.0867	15.3067	8.23	5.15667	4.96333	5.68333	5.74667	65.6767	4.27	4.22333	8.02	7	6.47	9.15333	71.47	9.24667	9.35667	6.85333	7.79	6.48333	7.72	46.6267	8.27	7.91667
508.404	5.84667	5.83333	4.58333	5.95	51.0967	6.95333	4.32	4.42667	3.47333	4.5	7.3	46.53	8.94667	5.68667	7.74667	6.41667	6.24	8.68333	50.5867	6.03667	8.57667	4.56667	4.94667	5.01667	7.56667	57.9567	15.57	8.30333	5.43667	5.28333	5.92333	6.06667	65.3	4.3	4.58	8.46667	7.27333	7.13667	9.57333	72.2267	9.56667	9.69667	7.13333	8.22	6.80667	8.00333	46.9433	8.76333	8.39
508.748	6.45	5.98333	4.63667	6.23333	51.62	7.54333	4.56667	4.78	4.08	4.83667	7.40667	46.95	9.09333	5.88333	7.76667	6.74667	6.57333	9.12333	50.92	6.43	8.83	4.64333	5.31	5.13667	7.93667	58.5167	16.0167	8.68667	5.75333	5.60333	6.40667	6.34	65.64	4.49	5.11	8.50333	7.45667	7.14333	9.86667	72.6333	9.90333	10.13	7.35	8.42	6.94667	8.47333	47.4733	9.24	8.53667
509.093	6.97667	6.33667	5.01	6.56333	51.7667	8.21	4.80333	5.12667	4.6	5.29	7.72	47.01	9.64667	6.36667	8.03333	7.46333	7.10333	9.42667	51.2167	6.86	9.51333	4.82667	5.70333	5.66	8.32	58.73	16.5367	9.40333	6.23667	6.24	6.46	6.93333	65.9133	4.90333	5.43667	8.56	7.44333	7.10667	9.98333	72.46	9.77	10.1167	7.45667	8.15333	6.77667	8.52667	47.4433	9.32333	8.60333
509.438	7.25333	6.78	5.04667	6.87667	52.2067	8.28	5.21333	5.44333	5.19333	5.72333	7.97667	47.35	9.56333	6.86333	8.1	7.60333	7.31667	9.85667	51.3233	7.01	9.71667	4.95333	5.99333	6.24333	8.26	58.9733	16.8333	9.57667	6.48667	6.71333	6.74667	7.20667	66.5467	5.24	5.91333	8.10333	7.37667	6.81	9.98667	72.8767	9.55	9.94333	7.35667	7.84	6.91667	8.39333	47.5167	9.13333	8.59
509.783	7.75333	7.18333	5.39333	7.07667	52.1867	8.71667	5.58667	5.49	5.53333	6.07	8.49667	47.6533	9.95	7.27667	8.33333	7.88	7.97667	10.3633	51.66	7.48	10.0167	5.24333	6.46333	6.32	8.68333	58.9467	17.43	10.0033	6.84	7.15	7.24333	7.51333	66.2033	5.77333	6.44	8.23	7.88667	7.21333	10.5	72.6933	10.2367	10.7333	7.70333	8.13667	7.51	8.68333	47.9567	9.60333	9.00667
510.127	7.55333	7.21667	5.67	6.80333	52.29	8.98	5.71333	5.68667	5.52	6.22	8.75667	48.2	9.88	7.55	8.40333	7.96333	8.03667	10.5767	51.8767	7.76	10.15	5.35333	6.47333	6.53	9.05667	59.26	17.58	9.99	6.89	7.45	7.45333	7.67667	66.4867	6.05667	6.6	8.42333	8.07	7.2	10.67	72.3167	10.5967	10.79	7.61333	8.24	7.73	8.91	47.9667	9.61667	9.22
510.472	7.20667	7.30333	5.73667	6.82667	52.1667	8.89667	5.74	5.74333	5.09333	6.09	8.6	48.1533	9.91667	7.59667	8.82667	7.77	8.23667	10.16	51.84	7.94	10.13	5.31667	6.37667	6.52667	9.00667	59.08	17.6433	10.0067	6.82333	7.4	7.43667	7.48333	66.5733	6.12333	6.62	8.32333	7.59333	7.01333	9.99333	71.9	10.1667	10.3067	7.24333	7.88667	7.26333	8.40667	47.64	9.33333	8.91667
510.816	7.09	7.13667	5.73333	6.91	52.23	8.68667	5.72	5.71333	4.97	6.05333	8.46667	48.15	9.6	7.47667	9.01667	7.74	7.76	10.0967	51.7967	7.81333	10.1633	5.23667	6.35667	6.20667	9.04667	58.82	17.7433	9.96	6.54667	7.30333	7.52333	7.24	66.4	5.96	6.69333	8.45333	7.92333	7.09333	10.1667	72.21	10.46	10.5733	7.08333	8.22	7.55	8.53	47.7533	9.54333	9.04333
511.161	6.9	6.79333	5.79667	6.57	52.24	8.87667	5.46667	5.66333	4.58333	5.93	8.50333	48.03	9.92667	7.31333	8.74	7.55667	7.80333	9.98667	51.7367	7.86333	10.15	5.20333	6.21667	5.98	8.97333	58.7033	17.85	9.92333	6.37333	7.15	7.23333	7.09333	66.2967	5.71	6.53667	8.76333	7.73333	7.23	10.23	71.67	10.69	10.42	7.03667	8.44667	7.35333	8.57	47.24	9.50667	8.97
511.505	6.55333	6.63333	5.65333	6.59333	52.4767	8.59333	5.47667	5.94333	4.47333	5.58	8.15	48.03	9.98333	7.22333	8.67667	7.36333	7.81667	9.71	51.8333	7.80667	9.95333	4.80667	6.04667	5.95667	8.86	59.02	17.65	10.01	6.35	7.02	7.16	6.98	66.5667	5.42333	6.45667	8.70333	7.25	6.98667	9.85	71.33	10.41	10.0733	6.92333	8.13333	6.91	8.5	46.84	9.46	8.56667
511.85	6.99333	6.75667	5.63333	6.82333	52.5467	8.91333	5.79	6.09	4.71333	5.58333	8.11333	48.0467	10.35	7.07667	8.8	7.41	7.69	9.90333	51.7633	8.02333	9.99	4.96667	6.12333	6.07333	9.08333	59.1033	17.9033	10.4133	6.3	6.86333	7.17667	7.04	66.4567	5.53	6.5	8.37333	7.2	6.90667	9.83	71.4633	10.3333	9.94333	6.90667	7.95333	6.6	8.41	46.7133	9.34667	8.4
512.194	7.19667	7.08667	5.67	6.99	52.8033	9.32333	5.92667	6.03	5.21667	5.74667	8.23	48.2133	10.6867	7.16667	8.84	7.6	7.69333	10.2767	51.6633	8.15	10.1267	5.33	6.36	6.35667	9.06667	59.2967	18.1933	10.61	6.39333	7.17667	7.3	7.29	66.7433	5.88667	6.67333	8.40667	7.42	7.01333	10.0533	71.3667	10.6	10.2867	7.18	8.19	7.13333	8.89	46.8467	9.45667	8.32667
512.538	6.87667	6.82333	5.32667	6.65	53.1067	9.17667	5.6	5.58667	4.78	5.45333	7.82	48.2067	10.7467	6.93333	8.48667	7.39	7.63	10.25	51.84	8.11667	9.70667	5.17	5.89667	6.29	8.83333	59.5133	18.09	10.3967	6.20667	6.99333	6.79667	6.95333	66.9367	5.85333	6.41	8.59333	7.17333	7.37333	10.2133	70.7833	10.9467	10.4167	7.69667	8.42667	7.23667	8.88667	46.7233	9.7	8.70333
512.883	6.93	6.94333	5.48667	6.93	53.11	9.55667	5.89333	5.64333	4.78667	5.52667	7.72	48.25	10.8767	6.94333	8.86	7.48333	7.49667	10.4067	52.0633	8.20333	9.80667	5.32333	6.13333	6.44	9.13333	59.41	18.15	10.4633	6.28	7.17667	6.98333	7.13	66.7367	5.92667	6.43667	8.38667	7.45	7.43333	10.11	70.86	10.8967	10.47	7.75333	8.28333	7.25333	8.87	46.9467	9.80333	8.85
513.227	6.95	7.03667	5.6	6.86667	52.62	10.02	5.91333	5.77667	4.92	5.73	7.62	47.9267	10.84	7.13	8.51	7.44333	7.42	10.48	51.65	8.23	9.85667	5.62667	6.28667	6.61667	9.08667	59.1433	18.1967	10.34	6.31	7.22667	7.09	7.19	66.3567	6.16333	6.26333	8.01	7.41	7.01333	9.98333	71.04	11.01	10.1	7.49667	8.03	6.86667	8.82667	47.0867	9.53333	8.44
513.571	6.33333	6.38333	5.28	6.57	52.6033	9.51667	5.46333	5.30667	4.08667	5.23	7.24333	47.59	10.5433	6.88667	7.96	6.88333	6.99333	9.98	51.54	7.9	9.5	5.18667	5.70333	6.16667	8.54	59.4033	17.9467	9.95	6.09	6.96667	6.73	6.83	66.6767	5.85667	5.81667	7.93667	7.13	6.6	9.57	70.6	10.7367	10.1533	7.21	7.86667	6.72	8.62667	46.8467	9.33	8.18333
513.915	6.03667	5.97	5.44333	6.26333	52.6767	9.55667	5.43667	5.14333	3.69333	5.25	7.33333	47.4067	10.3133	6.78667	7.72667	6.85	6.72333	9.81667	51.6467	7.75	9.58333	4.92	5.60667	6.22333	8.43667	58.9067	17.91	9.76667	5.92333	6.65	6.58333	6.77	66.2133	5.59667	5.83333	7.54333	6.79	6.42	9.17333	70.43	10.52	9.76667	6.72667	7.59	6.06333	7.99	46.72	8.8	7.87667
514.259	6.46333	6.15333	5.58667	6.61	52.32	9.87667	5.81	5.37667	3.85	5.44667	7.86	47.4967	10.5167	7.14667	7.75333	6.90667	6.95667	9.95	51.54	8.06	9.93667	5.19	5.83667	6.27333	8.71667	58.8633	18.0533	10.1433	6.13333	6.77667	7.02	7.04	66.05	5.9	5.93333	7.49	7.43333	6.28667	9.30667	70.8667	10.6333	9.58333	6.65333	7.46667	6.33667	8.09667	46.67	8.41	7.83333
514.603	6.85	6.49333	5.77	7.02333	52.24	10.05	5.89667	5.29667	4.13667	5.67	8.27667	47.7567	10.64	7.41333	7.63	7	7.30333	10.0767	51.3567	8.50667	10.26	5.29667	5.92333	6.25667	8.99	58.8867	18.44	10.43	6.20333	6.97333	7.25667	7.23667	66.3833	6.47333	6.18333	7.40667	7.14333	5.88667	9.09	70.87	10.41	9.36667	6.39667	7.17333	5.96333	7.91667	46.3267	8.04333	7.61
514.947	7.36333	6.69333	5.94	7.28667	52.6867	10.27	6.29	5.14	4.29333	5.79667	8.64333	48.1767	10.77	7.52	8.28	7.11	7.53333	10.2733	51.71	8.66333	10.6967	5.59	5.94667	6.45667	9.09333	59.31	18.71	10.8667	6.3	7.15	7.34667	7.53	66.6933	6.62	6.55	7.71333	7.63667	6.54667	9.46667	71.0833	10.48	10.0133	6.93333	7.56	6.43333	7.96333	46.76	8.33667	8.09
515.291	7.51333	7.09667	5.99667	7.79667	52.4867	10.67	6.57333	5.31	4.8	6.19667	8.93667	48.18	11.0333	7.84667	8.52333	7.39333	7.95667	10.63	51.99	8.93667	11.0733	6.04667	6.38	6.71333	9.35667	59.03	19.0967	11.1333	6.61333	7.38	7.60333	7.75667	66.5367	6.99	7.05	7.89667	7.99	7.05333	9.83667	71.22	11.16	10.2633	7.36333	7.90333	6.75333	8.11667	47.1767	8.79333	8.44333
515.635	7.68333	7.37667	5.96333	8.00333	52.03	10.6467	6.48333	5.50333	4.83333	5.98	9.03	47.9567	11.1967	7.92	8.66333	7.30333	8.17667	10.6133	51.8	9	10.9967	6.07667	6.41333	6.61	9.45667	59.0667	19.3867	11.08	6.77	7.46333	7.57667	7.64	66.3133	7.08	6.73	8.14667	8.10667	6.93333	10.08	71.4967	11.2767	10.3033	7.67667	7.92	6.85667	8.23	46.7033	9.15667	8.70667
515.979	7.25	7.10667	5.48333	7.74	51.8567	10.47	5.99667	5.33667	4.71667	5.63333	8.6	47.6	11.0033	7.45667	8.54	7.07333	7.94333	10.1767	51.47	8.66	10.6933	5.65333	6.15667	6.41	9.15333	58.6767	19.29	10.6967	6.48	7.04	7.20667	7.42	66.15	6.95667	6.45333	8.01333	7.63667	6.79667	10.0133	71.5267	11.3933	10.48	7.49	7.72667	6.68667	8.17333	46.76	9.35333	8.69667
516.323	7.17667	7.19333	5.32	7.32	51.92	10.38	6.15667	5.40333	4.57333	5.69	8.30333	47.41	11.1433	7.47	8.57667	7.20667	7.88667	9.96667	51.5667	8.52667	10.8033	5.62	6.17333	6.64333	9.19	58.6167	19.5033	10.7167	6.78	6.98333	7.15	7.41667	65.9433	6.97333	6.47	7.99333	7.74667	7.02333	10.1367	72.1033	11.7733	10.6767	7.55667	7.82	6.96667	8.28667	47.2633	9.30667	8.72
516.667	7.04333	7.29667	5.22	7.28333	52.2067	10.6267	6.31333	5.53	4.58333	5.59	8.45667	47.5633	11.5	7.60333	8.41	7.44	7.89	9.90333	51.9067	8.75	11.0033	5.62333	6.25667	6.57667	9.37	58.9633	19.93	10.62	6.86333	7.11667	7.25	7.56333	66.0167	7.06667	6.61	8.14667	7.52333	7.07333	10.3633	72.5367	12.0767	10.6967	7.54	7.71667	7.32667	8.62	46.98	9.32667	8.79333
517.011	6.83	7.15	5.27	6.78	52.21	10.67	6.21333	5.47	4.53	5.43333	8.33333	47.5333	11.17	7.10667	8.32333	7.36667	7.60667	9.53667	51.9	8.76333	10.8833	5.36	6.18667	6.37333	9.26667	58.9667	19.8	10.4467	6.55667	6.89333	7.24333	7.28	65.91	7.21	6.16	8.30667	7.37667	6.88333	10.27	72.89	11.9167	10.87	7.59667	7.79333	7.21333	8.63	47.0267	9.31333	8.58
517.354	6.23333	6.40333	4.67667	6.18	52.1333	10.3533	5.79	4.96	4.00333	4.86667	7.64333	47.5833	10.55	6.72	7.62	7.14667	6.91667	8.97333	51.6167	8.31333	10.6367	4.85667	5.79	5.77667	9.04667	58.8633	19.3833	10.0567	5.82333	6.43333	6.84	6.92	65.95	6.97667	6.00333	8.38667	7.45333	7.07333	10.06	72.8567	12.1167	10.8967	7.39333	7.81	7.34333	8.63	47.3433	9.21667	8.62
517.698	6.50667	6.88667	5.15667	6.40333	52.6567	10.91	6.66	5.26	4.3	5.20333	8.20667	47.9933	11.0167	7.34667	7.68667	7.34	7.31	9.36333	52.08	8.8	11.04	5.4	6.31	5.90333	9.36333	59.46	19.7667	10.54	6.15	6.64333	7.13	7.19333	66.36	7.32667	6.67667	8.62667	7.40333	7.16333	9.78667	73.2067	12.2167	10.84	7.35667	8.00333	7.22667	8.59	47.3433	9.23667	8.41333
518.042	6.19	6.41333	4.93667	6.53	52.5967	11.0133	6.42667	5.33333	4.32333	4.92333	8.03667	47.97	10.8767	7.07333	7.39	7.21	7.08667	9.13667	52.0133	8.62667	10.7067	5.28667	6.06667	5.54	8.90333	59.6967	19.4067	10.45	5.77	6.30333	7.05333	6.76667	66.1733	7.12667	6.46333	8.47	7.32333	7.22333	9.62	72.6667	12.25	10.9033	7.49667	8.03667	7.02333	8.47	47.1167	9.16	8.11
518.385	5.81	6.03	4.7	6.19333	52.2867	10.6733	5.94333	4.85667	3.88333	4.70333	7.56	47.66	10.55	6.62333	7.03333	6.75333	6.53667	8.81667	51.7533	8.42333	10.3133	4.82667	5.67	5.08333	8.43667	59.2133	19.0233	10.0367	5.42	5.89333	6.64333	6.07667	66.1267	6.86333	5.98333	8.17333	7.14667	6.84333	9.18667	72.2433	11.9933	10.6267	7.09333	7.89333	6.49667	8.09667	46.95	9.05333	7.9
518.729	6.22333	6.28	4.77	6.59	52.4367	10.8933	6.08333	5.06333	3.91667	4.87	7.78667	47.6467	10.9833	7.07	7.32667	7.01667	6.65667	9.07333	51.6767	8.69	10.7267	4.96667	5.84667	5.44333	8.69	59.4533	19.1433	10.2	5.67	6.08333	6.66	6.41	66.2633	6.91333	6.45333	7.94333	6.98333	6.89	9.10667	72.0267	12.0633	10.6267	6.78333	7.79667	6.47667	8.00667	46.86	8.89	7.82667
519.072	6.68667	6.66333	5.30333	7.03	52.7067	11.3933	6.5	5.46	4.52	5.20333	8.24333	47.9233	11.4833	7.47667	7.80667	7.34333	7.10333	9.47333	52.25	9.01333	10.7567	5.4	6.07667	5.68333	8.93333	60.1633	19.6233	10.6133	6.14333	6.52333	6.94667	6.86	66.69	7.25	6.82	8.01	7.20667	6.91	9.45333	72.3367	12.3267	10.84	6.98	7.84667	6.51333	8.06	46.9333	9.15333	7.94667
519.416	6.36667	6.50333	5.15667	6.84667	52.33	11.41	6.27	5.20333	4.28333	4.92	7.65	47.9067	11.21	7.11	7.75	7.35333	6.78	9.36667	52.29	8.81333	10.5867	5.12333	5.91	5.79	8.70333	60.13	19.5533	10.4333	5.90667	6.57	6.74	6.71	66.8	7.14	6.7	7.68333	7.08333	7.08	9.68333	72.1467	12.1333	10.6967	6.79667	7.66	6.48333	7.85333	47.08	9.09	7.92333
519.759	6.44	6.65667	5.45667	6.90333	51.9567	11.42	6.12667	5.07	4.21667	4.82	7.67667	47.8067	11.27	7.12667	7.86333	7.32667	6.89667	9.53	52.1267	8.97667	10.6	5.20667	6.03333	5.91	8.86	60.1467	19.73	10.4467	5.94333	6.67333	6.62	7.11333	66.6933	7.15667	6.90667	7.68333	6.94	6.84667	9.63	72.04	11.88	10.66	6.42667	7.31	6.30667	7.72333	47.0633	9.11333	8.00333
520.103	6.64	6.80333	5.66333	7.19333	51.5567	11.8633	6.38333	5.52667	4.67	5.14	7.81333	47.83	11.4233	7.41667	8.1	7.74	7.28333	9.89	52.0733	9.34667	10.7733	5.37	6.46667	6.33333	9.21	60.1	20.0067	10.8633	6.05667	6.96333	6.83667	7.69667	66.4967	7.54	7.21667	7.93333	7.07333	6.74333	9.64	72.12	12.1133	10.7	6.61667	7.47	6.46	7.82667	47.0433	9.08333	8.03667
520.446	6.57667	6.78333	5.77667	7.10667	51.49	11.8367	6.45333	5.30333	4.68667	5.05667	7.62	47.6733	11.4567	7.44667	7.89	7.70667	7.30667	9.90667	52.2533	9.4	10.6733	5.42667	6.45333	6.10333	9.04	59.8167	20.2	11.0367	5.97667	6.84	6.73	7.62	66.4133	7.63333	7.07333	8.02667	7.34667	6.64667	9.62333	71.7867	12.4	10.6567	6.76	7.45667	6.42333	7.92333	46.9867	9.15	8.19
520.789	6.79667	7.07333	5.74	7.27333	51.6867	11.93	6.81	5.39333	4.74	5.44333	7.66667	47.8267	11.8767	7.43333	8.05	7.79	7.4	9.97	52.3033	9.72667	11.0333	5.6	6.72667	6.56667	9.17333	59.79	20.4067	11.12	6.19667	6.93333	6.90667	7.79667	66.4567	7.89333	7.38667	7.87667	6.97	6.65333	9.37667	71.35	12.3	10.5567	6.61667	7.41	6.44333	7.82333	47.0633	9.02667	7.95
521.132	6.89333	6.82	5.73333	7.52	51.5967	11.8	6.64333	5.45	4.75667	5.50333	7.80667	47.7333	11.8367	7.42	8.03667	7.51667	7.25667	9.83667	52.1233	9.75667	11.0467	5.53	6.66667	6.42	8.99	59.7067	20.32	10.8633	6.08333	6.76667	6.88	7.7	66.2867	7.85667	7.27333	8.08	7.27	6.72667	9.51	71.2533	12.82	10.97	7.13667	7.83	6.77667	8.21333	47.1467	9.38333	8.39333
521.476	7.11	6.86333	5.48333	7.29667	51.8433	12.0767	6.89667	5.47	4.61333	5.49333	7.81667	48.0167	11.8767	7.46667	8.15333	7.51333	7.22	9.77333	52.6433	9.84333	11.3467	5.48	6.8	6.54333	9.22667	59.8133	20.2367	10.7433	6.01333	6.74667	6.98333	7.64	66.4467	7.93	7.22	8.09667	7.30333	6.87667	9.72333	71.7333	13.12	11.1967	7.43	8.08	6.95667	8.34333	47.2567	9.66667	8.60333
521.819	6.99333	6.64667	5.51333	7.17333	51.9933	12.0433	6.89	5.35333	4.29667	5.32333	7.75333	47.9033	11.9267	7.34333	7.96333	7.31	7.13667	9.49	52.41	9.70667	11.3733	5.35	6.53333	6.45	9.16667	59.72	20.0233	10.5167	5.93667	6.62	6.81333	7.34	66.2533	7.87333	7.21	8.17	7.44333	7.17333	10.06	71.89	13.2933	11.46	7.62333	7.82	7.03	8.38333	47.71	9.99	8.88667
522.162	6.79333	6.44333	5.33667	6.98333	51.7667	11.93	6.83667	5.34667	4.11333	5.23667	7.66667	47.75	11.85	7.12667	7.85	7.02333	7	9.17	51.8667	9.43667	11.1733	5.07667	6.33667	6.42667	8.92333	59.53	19.6967	10.3433	5.87	6.59667	6.78333	7.28667	65.8567	7.8	7.19	8.39	7.42	7.36333	10.34	72.58	13.2467	11.7967	7.71333	7.93667	7.26667	8.56667	47.7567	10.11	8.92
522.505	6.82333	6.29667	5.52667	7.16	51.7467	12.3467	6.85333	5.19	3.97	5.20333	7.93333	47.6767	11.9633	7.38	7.86	7.23333	7.06667	9.41	51.98	9.75333	11.3967	5.23	6.32	6.44	9.04	59.4433	19.71	10.2567	5.96333	6.57	6.83667	7.27	65.7867	7.87	7.05333	8.47	7.76	7.42667	10.4433	72.7667	13.3933	11.88	7.66667	8.14333	7.4	8.88667	47.8133	10.1267	9.16
522.848	7.03	6.46333	5.66667	7.17333	52.0433	12.6533	6.98667	5.28333	3.94667	5.49667	8.22333	47.7767	12.23	7.43	8.02667	7.59333	7.47	9.68	52.1	10	11.4833	5.29667	6.43667	6.69333	9.48	59.65	19.9833	10.46	6.32	6.73667	6.97333	7.71333	65.5	8.21667	7.20667	8.31333	7.68	7.21667	10.2567	72.5267	12.9767	11.6133	7.61333	7.85667	7.24667	8.81333	47.74	9.85	8.62
523.191	6.72667	6.22667	5.59667	7.20333	52.1133	12.65	6.84333	5.05667	3.96333	5.41	8.04667	47.4533	12.14	7.12333	7.87667	7.47667	7.30667	9.61667	51.8367	9.93667	11.34	5.15	6.16333	6.51667	9.24333	59.6233	20.09	10.4567	6.26333	6.76667	6.88667	7.54333	65.69	8.27667	7.06	8.44	7.81	7.08333	10.1533	71.9967	13.0233	11.53	7.48333	8.02333	7.28667	8.80333	47.7433	9.82333	8.56
523.534	6.76	6.62	5.62667	7.29667	52.2067	12.73	7.05667	5.27667	4.17333	5.62	8.14333	47.5467	12.2867	7.34333	8.11	7.69	7.26667	9.88	51.99	10.0267	11.4933	5.36667	6.32667	6.72667	9.36667	59.7567	20.3967	10.8233	6.43333	6.74667	7.07333	7.92333	65.92	8.47667	7.21	8.46667	7.75667	6.91	9.81667	72.0333	12.97	11.49	7.36667	8.15667	7.23667	8.72	47.7	9.58333	8.24667
523.877	6.99	6.79333	5.85333	7.44667	52.3	13.3533	7.29	5.47333	4.42333	5.82	8.36	47.9033	12.6133	7.66	8.44333	8.12	7.46667	10.1667	52.3233	10.4933	11.8433	5.66667	6.46333	6.92333	9.86333	60.1	20.9233	11.1733	6.65667	6.88667	7.3	8.02	66.2467	8.66	7.35667	8.31667	7.76667	6.85667	9.62667	71.6767	13.0067	11.3	7.47333	7.92333	7.15	8.60667	47.4133	9.54333	8.27
524.22	6.91	6.82333	5.74	7.15	51.9333	13.11	7.40333	5.67333	4.53667	5.61333	8.02667	47.6867	12.3567	7.44	8.59	7.80667	7.52333	10.14	52.1967	10.2667	11.5267	5.42	6.34	6.83333	9.75	59.9433	20.84	11.2033	6.53667	6.74333	7.17333	7.90333	65.9867	8.61333	7.30667	8.38333	7.65	6.97333	9.65333	71.7667	13.1067	11.56	7.62333	7.91	7.1	8.51	47.6167	9.47	8.22667
524.562	6.83333	7.06	5.77333	7.06667	51.6233	13.2	7.49	5.63	4.69333	5.41	7.80333	47.3233	12.44	7.55333	8.55	7.77333	7.30667	10.0567	52.1	10.2933	11.54	5.39	6.41333	6.8	9.58	59.6233	20.8467	11.1833	6.57333	6.85667	7.3	7.64333	66.0033	8.65333	7.33	8.60667	7.83	7.03	9.85667	71.85	13.2633	11.8667	7.57667	7.98667	7.07	8.56333	47.6733	9.58	8.59667
524.905	7.21	7.52333	6.16667	7.35	51.7533	13.5133	8.12667	6.12667	5.14	5.83667	8.24667	47.4967	12.8433	8.22	8.93	8.26667	7.71	10.3967	52.3033	10.5633	11.6667	5.69	6.88	7.03333	9.98667	59.64	21.08	11.6267	7.00667	7.07	7.55333	7.91333	65.9033	9.19	7.81	8.66667	7.82667	7.16667	9.94667	72.2033	13.2467	12.04	7.56	7.79667	7.07667	8.61	47.5967	9.56	8.48333
525.248	6.99667	7.14	6.00667	7.17667	51.6167	13.2733	7.80333	5.54	4.83	5.32667	7.97	47.19	12.4133	7.84	8.76	7.96	7.53667	9.94	52.4333	10.28	11.3367	5.48333	6.60333	6.69	9.73	59.63	20.4833	11.18	6.77	6.77333	7.25333	7.45	65.6733	8.93	7.44	8.56333	8.05333	7.43333	10.2967	72.3067	13.5367	12	7.54333	7.88333	7.34333	8.7	47.54	9.60667	8.66
525.591	6.87333	7.26333	5.94	7.06667	51.6367	12.98	7.73	5.43667	4.79333	5.27667	7.81333	47.1267	12.28	7.65	8.52	8.01	7.56333	9.86667	52.3133	10.0367	11.1133	5.49667	6.58667	6.67	9.61	59.7667	20.34	10.9633	6.57	6.65	7.04	7.27333	65.3667	8.86	7.58	8.58	8.02333	7.31	10.2033	72.2367	13.6433	11.8733	7.24333	8.03667	7.15	8.67	47.7433	9.49667	8.67
525.933	7.03667	7.36667	5.90667	7.20667	52.0367	13.2333	7.59	5.43	4.74333	5.33	8.07667	47.2433	12.3233	7.73667	8.32	8.17	7.39667	9.90667	52.4767	10.2867	11.2867	5.63	6.70333	6.66333	9.64	59.5967	20.51	11.1433	6.51333	6.83	7.17	7.37	65.79	8.96667	7.80667	8.53667	7.96667	7.21	10.31	72.4567	13.6767	11.6733	7.36	7.90667	7.03667	8.79667	47.4733	9.54667	8.66333
526.276	7.15	7.55	5.89667	7.31667	52.04	13.29	7.74667	5.55333	4.81667	5.36	8.32333	47.5367	12.3933	7.82	8.28333	8.27	7.56667	9.98667	52.6433	10.38	11.34	5.86	6.78333	6.71667	9.84667	59.9	20.6233	11.42	6.50333	6.95	7.20333	7.58333	65.86	9.03333	7.93667	8.46	7.9	7.22667	10.2833	72.8733	13.9567	11.7433	7.39	7.8	6.98333	8.81667	47.6867	9.48667	8.61333
526.618	7.08	7.46333	5.77	7.29333	51.58	13.1067	7.56667	5.30667	4.69	5.36333	8.25333	47.2967	12.3	7.64	8.21333	7.96	7.53333	9.81	52.2667	10.31	11.26	5.85	6.72	6.72	9.70667	59.71	20.5033	11.3267	6.36333	6.98	7.07333	7.51333	65.3133	8.8	7.81333	8.53	8.03	7.43667	10.23	72.96	14.2733	11.7633	7.53667	7.94333	7.03667	8.93667	47.74	9.76	8.83333
526.961	7.06667	7.58	5.66333	7.10667	51.5433	13.2467	7.60333	5.39333	4.69	5.48333	8.12333	47.26	12.3767	7.78	8.14333	7.96667	7.48667	10.1433	51.8867	10.3667	11.21	5.87667	6.85	6.78333	9.79	59.61	20.8133	11.27	6.33333	7.11	7.1	7.5	65.33	9.06	7.89667	8.58	7.79	7.17333	9.95667	72.7433	14.0267	11.68	7.49	7.96	6.94333	8.86667	47.78	9.88	8.81333
527.303	7.02667	7.37667	5.51	7.17667	51.5133	13.3867	7.47333	5.13667	4.69333	5.26667	8.11667	47.3133	12.3533	7.79667	8.19667	7.68667	7.29667	10.0833	52	10.3	11.0333	5.66667	6.74	6.54667	9.70667	59.4	20.7133	11.3067	6.31	7.12667	7.15667	7.64667	65.5467	9.12	7.57	8.55	7.86	7.24667	10.12	72.5067	13.9367	11.76	7.70667	7.70667	6.96333	8.73	47.6567	9.95667	8.53
527.646	6.70667	7.09	5.25	6.87667	51.2667	13.03	7.34333	4.82667	4.31	5.14333	7.73333	47.2133	12.31	7.67333	7.88667	7.27333	7.13	9.93	51.7	9.97667	10.8767	5.33	6.40333	6.34667	9.44667	59.6933	20.69	11.0733	5.95667	6.79333	6.75	7.3	65.0667	9.11	7.33	8.67	8.01333	7.39	10.28	72.2967	14.02	11.9167	7.69	7.99333	7.07	8.75333	47.8033	10.1633	8.54333
527.988	6.5	6.72	4.92667	6.51333	51.1367	12.7767	7.23	4.59667	4.26	5.07333	7.24	47.1433	11.96	7.38	7.55	7.19667	6.92333	9.75	51.71	9.72333	10.5867	5.11	6.18	6.1	9.22667	59.4033	20.34	10.71	5.69667	6.66	6.52667	6.99333	64.83	8.88	6.98667	8.44667	7.75333	7.45	10.1767	72.49	13.8667	11.5333	7.31	8.05	6.99667	8.52333	47.5733	10	8.33333
528.33	6.56333	6.57	5.01333	6.52333	51.3067	12.9467	7.19	4.68333	4.3	4.87333	7.19667	47.2967	11.9067	7.36667	7.53	7.37	6.78667	9.61333	52.0867	9.68333	10.8	5.09333	6.09333	6.18	9.32333	59.5967	20.4133	10.6967	5.67667	6.60667	6.59333	7.02	65.2267	8.98333	7.08667	8.55667	7.72	7.38667	10.3467	72.56	13.9967	11.5533	7.39	8.10333	7.11667	8.40667	47.83	9.88333	8.22
528.673	6.77	6.52333	5.18667	6.81667	51.6567	13.0667	7.51667	4.69	4.44667	4.94667	7.51	47.5333	12.08	7.44333	7.46333	7.37	7.05	9.59667	52.64	9.99333	11.04	5.03667	6.15333	6.23	9.32333	60.0067	20.6833	10.9467	5.81333	6.72333	6.68667	7.23333	65.24	9	7.25667	8.45333	7.70333	7.4	10.44	72.5767	14.0567	11.6633	7.23333	7.95333	6.98667	8.34333	47.6867	9.76667	8.17
529.015	6.99333	6.73667	5.37333	6.88333	51.6367	13.2633	7.69	4.97	4.44	5.26333	7.54	47.65	12.25	7.62333	7.50667	7.46333	7.32667	9.73667	52.76	10.3033	11.4167	5.35667	6.48667	6.47667	9.38	59.9133	20.83	10.9133	5.94667	6.86667	6.73333	7.30333	65.0933	9.26	7.52	8.09	7.35333	7.18333	10.05	72.79	13.9267	11.6467	6.7	7.92333	6.75333	8.13667	47.6233	9.47333	7.99667
529.357	7.08333	6.93667	5.65667	7.19333	51.72	13.7667	8.01667	5.09333	4.67667	5.39667	7.91333	47.99	12.2767	7.71667	7.68667	7.82333	7.66667	9.85333	53.1033	10.55	11.59	5.71	6.99667	6.73333	9.63667	60.1167	20.7967	11.0967	6.27	7.14667	7.16	7.54333	65.2567	9.39333	7.66667	7.82667	7.14333	6.88667	9.79667	72.87	13.8067	11.4767	6.58667	7.66667	6.62333	7.96333	47.53	9.25667	7.98667
529.699	7.16667	6.98667	5.97	7.35	51.7367	13.97	7.95333	5.17667	4.39667	5.28667	8.23333	48.13	12.49	7.85	7.92667	7.88	7.72	9.85	53.1367	10.6733	11.71	5.74333	7.09333	6.98333	9.71333	60.53	21.0733	11.2067	6.40333	6.99333	7.23	7.58667	65.49	9.56667	7.94333	7.76	7.11333	6.65333	9.59333	72.5967	13.5267	11.6133	6.5	7.41667	6.60333	7.76667	47.74	9.37333	8.03
530.041	7.11	7.14333	5.93	7.48667	52.32	14.1833	8.03	5.26333	4.37667	5.55667	8.36667	48.4833	12.7033	8.08	8.05667	8.01667	7.89	10.0467	53.33	11.0733	11.7333	5.81333	7.42	7.06667	9.70667	60.6967	21.3067	11.3967	6.60667	7.22667	7.33667	7.64	65.72	9.79667	7.90667	7.17667	6.76667	6.35667	9.37333	72.54	13.18	11.3867	6.19667	7.26	6.23333	7.57667	47.4	9.21333	7.93333
530.383	6.90333	7.10333	5.87	7.40333	52.2467	14.3533	7.93	5.35333	4.32333	5.55333	8.17667	48.5667	12.6967	8.11	8.09	8.07667	7.72667	10.07	53.3933	10.9433	11.63	5.74	7.45	7.09333	9.75333	60.7833	21.2033	11.4533	6.48	7.18667	7.27	7.51667	65.83	9.73667	7.72667	7.22333	6.83	6.42	9.24333	72.8833	13.3233	11.5833	6.38667	7.49	6.14333	7.73	47.51	9.15667	7.74333
530.725	7.01	7.21667	6.05667	7.65	52.6367	14.51	8.05333	5.54333	4.51667	5.59667	8.42	48.8167	12.86	8.31	8.28	8.38	7.9	10.4167	53.6667	11.03	11.79	5.77333	7.26333	7.34333	9.95	61.46	21.4133	11.7833	6.79667	7.49667	7.53333	7.75667	66.26	9.91667	7.94333	7.43	7.09	6.66333	9.53	73.1033	13.6967	11.88	6.57	7.8	6.29	8.14	47.5967	9.52	7.88667
531.067	6.89667	7.06	5.84	7.57	52.43	14.22	7.84667	5.52333	4.44333	5.37667	8.22	48.42	12.83	8.18667	8.28667	8.26	7.54333	10.2433	53.3567	10.6933	11.5567	5.54333	6.85667	7.22333	9.79667	61.25	21.14	11.7	6.67667	7.44667	7.30333	7.68	65.9733	9.78333	7.73667	7.57667	7.37	6.92	9.74333	73.38	14.0767	12.1067	6.62333	7.98333	6.55	8.24333	47.9133	9.62	8.05667
531.409	7.14333	7.3	5.98	7.90333	52.6733	14.52	8.08667	5.86667	4.95	5.7	8.40333	48.3067	13.0633	8.61333	8.55	8.43333	7.92333	10.6067	53.4167	10.82	11.8567	5.97	6.94667	7.38667	10.2367	61.0333	21.4733	11.93	6.86333	7.83333	7.6	7.98667	65.78	9.99	7.95333	7.78333	7.72333	7.13	10.0467	73.3167	14.4133	12.3	6.96667	8.25333	6.71667	8.67667	47.83	9.72333	8.06667
531.751	7.02333	7.21333	5.8	7.49	52.25	14.4333	7.86333	5.63333	4.81667	5.28667	8.01	48.1	12.8467	8.40667	8.3	8.06667	7.63667	10.57	53.2	10.4	11.5533	5.73667	6.61333	7.09	10.0067	60.9267	21.36	11.5033	6.57	7.33333	7.32333	7.77	65.41	9.75	7.94	8.20333	7.99	7.54333	10.3767	73.4167	14.87	12.5333	7.24667	8.61667	7.12667	9.05	48.19	10.0833	8.30667
532.093	7.07	7.42	5.84	7.62333	52.3533	14.3233	7.90333	5.62667	4.82	5.18333	8.34	48.1767	13.0033	8.37667	8.52	8.23333	7.82333	10.6367	53.11	10.5233	11.6333	5.88333	6.63333	7.22	10.02	60.7433	21.4	11.53	6.72	7.56	7.45667	8.06333	65.5933	9.92667	8.25667	8.16667	7.76	7.54667	10.4467	73.1333	14.89	12.3133	7.09	8.51	7.08333	9	48.0367	10.1667	8.43333
532.435	6.77667	7.12667	5.56667	7.34	51.75	14.11	7.74667	5.34333	4.45333	4.99333	8.04	47.44	12.8167	8.17333	8.25	7.84	7.53	10.23	52.5367	10.1667	11.18	5.66	6.59333	6.92	9.76333	60.0267	21.2167	11.1767	6.22	7.29	7.16333	7.67333	65.0067	9.72667	7.94667	8.19333	7.72	7.58333	10.4233	72.97	14.7033	12.1833	7.27667	8.33333	7.17333	8.91	48.2433	10.0667	8.69
532.777	6.82667	7.14333	5.73333	7.21333	51.6	13.98	7.66667	5.23667	4.36667	5.03	8.09	47.4667	12.7967	8.17667	8.32667	7.67667	7.71333	10.1833	52.6767	10.37	11.2167	5.66	6.61667	6.88667	9.83667	60.1	21.2333	11.13	6.35	7.16	7.16333	7.61333	65.16	9.74333	8.10667	8.03667	7.47	7.29	10.28	72.71	14.4167	11.98	7.23	8.18667	6.93667	8.85	48.1867	9.95	8.46
533.118	6.34667	6.81667	5.34333	6.80333	51.3133	13.5533	7.41	4.58667	3.89	4.70333	7.69	47.2533	12.44	7.75667	7.95333	7.34	7.33333	9.63333	52.38	10.0733	10.87	5.13	6.33	6.60333	9.22	59.87	20.9	10.9033	6.05	6.77	6.78333	7.31333	64.97	9.39	7.68333	8.45333	7.65333	7.35	10.4867	72.5833	14.6767	12.1933	7.3	8.38667	7.09333	8.91333	48.1633	10.12	8.89333
533.46	6.36333	6.84333	5.27	6.83333	50.9767	13.3333	7.55667	4.64	3.82333	4.68667	7.70333	47.13	12.3033	7.80667	7.93	7.36	7.40667	9.61667	52.2	10.11	10.8133	5.15667	6.24667	6.6	9.26	59.8633	20.8133	11.0233	6.00333	6.84	6.88667	7.30667	64.8333	9.42333	7.60333	8.47667	7.82	7.02667	10.2933	72.2633	14.4633	12.16	7.24	8.15667	6.77333	8.77333	47.9333	9.73333	8.77667
533.802	6.33	6.63	5.29667	6.68	50.82	13.33	7.34667	4.67667	3.78333	4.61667	7.51667	47.0933	12.2733	7.72667	7.73333	7.32667	7.32	9.44333	52.3467	9.95333	10.5733	5.15	6.03667	6.49667	9.15	60.1267	20.74	10.9033	5.84333	6.57333	6.72333	7.01667	64.72	9.36667	7.45667	8.43333	8.06667	7.05667	10.3567	72.2667	14.5133	12.2333	7.35333	8.09333	6.92333	8.84333	48.11	9.77333	8.83333
534.143	6.08667	6.5	5.14	6.42667	50.83	13.2333	7.11	4.48667	3.6	4.38333	7.16667	47.1567	11.96	7.42	7.43667	7.14667	6.96333	9.3	52.6333	9.82333	10.3867	4.9	5.72	6.28	8.93667	60.47	20.41	10.7567	5.67	6.18	6.52333	6.86667	64.64	9.13	7.17333	8.32667	8.06667	7.02	10.5167	72.5	14.63	12.1733	7.33667	8.08667	6.96	8.75333	48.1867	9.83	8.81667
534.485	5.96667	6.47	5.02333	6.37	50.75	13.5133	7.02667	4.56	3.63	4.37667	6.96667	47.1767	11.9467	7.37333	7.37333	7.31333	6.82667	9.47333	52.6833	9.66667	10.3067	4.92667	5.74333	6.36667	8.92	60.5767	20.4633	10.8233	5.56	6.15	6.51667	6.80667	64.6467	9.10333	7.01	8.58	8.31333	7.39333	10.8333	72.88	14.6533	12.58	7.56	8.3	7.06667	8.89333	48.4133	10.1367	8.89333
534.826	6.20333	6.66	5.26333	6.50333	51.06	13.8867	7.03667	4.86667	3.8	4.49333	7.09667	47.7233	12.1267	7.39667	7.54667	7.4	6.92667	9.87667	53.06	9.94333	10.4233	5.25	5.95333	6.42667	9.15333	60.8633	20.56	10.99	5.71	6.23667	6.66333	6.87667	65.0067	9.38	7.28333	8.33667	8.00667	7.33	10.6567	72.7033	14.5267	12.4433	7.60333	8.27	7.01333	8.71	48.21	10.0033	8.69333
535.168	6.10333	6.50667	5.44667	6.53	51.27	14.0033	6.82667	4.77333	3.72667	4.39333	7.2	47.7467	12.29	7.30667	7.55667	7.51	6.85667	9.76333	53.38	9.85667	10.5933	5.18333	5.91667	6.45667	9.05	61.1767	20.3933	10.8767	5.63667	6.19	6.59333	6.84667	65.1033	9.33333	7.11333	8.33333	7.80333	7.61333	10.6133	73.08	14.56	12.5667	7.66333	8.17667	7.21	8.62667	48.6067	10.3	8.70333
535.509	6.23667	6.58667	5.45	6.62	51.0233	14.1567	7.01667	4.93	3.87667	4.62	7.30333	47.77	12.19	7.36667	7.62	7.48333	7.01	9.82667	53.4	9.84333	10.76	5.01333	6.01	6.66	9.23667	60.9533	20.4467	10.9	5.92	6.30667	6.73	6.99667	65.1033	9.43333	7.27	8.31333	7.69333	7.51333	10.57	73.1433	14.4667	12.6633	7.65333	8.24667	7.07667	8.55667	48.58	10.2233	8.76333
535.85	6.47333	6.75333	5.68333	6.95	51.1933	14.1833	7.26	5.14333	4.11667	4.74667	7.62333	48.2767	12.4233	7.58	7.75333	7.67667	7.48	9.98333	53.3967	10.05	10.9567	5.21667	6.45667	6.76	9.63333	60.84	20.78	11.1467	6.20333	6.60333	6.85667	7.25333	65.2633	9.70667	7.73667	8.45667	7.88333	7.65667	10.5833	72.9433	14.44	12.8233	7.75667	8.26333	7.25	8.62333	48.2567	10.27	8.82667
536.192	6.57	6.71333	5.50333	6.98667	51.46	14.08	7.37333	4.92333	3.97667	4.61	7.54	48.3233	12.51	7.56667	7.52333	7.60667	7.50667	9.81	53.26	9.94	11.0367	5.1	6.47667	6.59333	9.57	60.6267	20.8833	11.1767	6.24	6.69667	6.80667	7.30667	65.19	9.77	7.67667	8.29667	7.54	7.36	10.2467	72.6667	14.3633	12.5467	7.50667	8.03667	7.04667	8.32333	47.9067	10.0267	8.75667
536.533	6.33	6.65667	5.27667	6.9	51.2333	14.0833	7.39	4.86	3.84	4.47667	7.49667	48.0333	12.53	7.55333	7.45667	7.49667	7.41667	9.58	53.3167	9.78	11.1333	4.89667	6.38667	6.60333	9.51667	60.9533	20.75	11.0767	6.18667	6.72667	6.61667	7.24	65.16	9.60667	7.47667	8.04333	7.68	7.3	10.3467	72.9133	14.4333	12.56	7.38667	7.96333	6.99667	8.48333	48.1767	10.0933	8.51333
536.874	6.50667	6.91333	5.42667	7.12333	51.45	14.4267	7.77333	5.14	4.09333	4.83333	7.72667	48.3033	12.69	7.80667	7.57667	7.63	7.66	10.02	53.3967	10.07	11.3133	5.16333	6.56	7.00333	9.95667	60.9867	21.25	11.4467	6.54667	7.03	6.90333	7.56	65.3233	9.96667	8.03333	8.16333	7.84333	7.11333	10.5233	72.8833	14.47	12.6767	7.33333	8.12667	7.11	8.57333	47.8867	10	8.69333
537.215	6.75333	7.16333	5.7	7.19333	51.61	14.49	7.92667	5.03	4.31	4.98333	7.62333	48.1633	12.99	8.07333	7.7	7.79	7.74	10.17	53.2067	10.18	11.3967	5.38	6.81	7.10667	10.0033	61.04	21.4133	11.6133	6.53333	7.19333	6.99	7.64333	65.2133	10.2233	7.95	8.32333	8.12	7.31667	10.6967	73.1867	14.7333	12.7867	7.31667	8.35	7.44333	8.77667	48.1233	10.2333	8.84333
537.556	6.95333	7.35667	5.65667	7.36	51.6433	14.6867	8.15	5.28667	4.46333	5.2	7.89333	47.9867	12.9867	8.18333	7.93333	8.00667	7.73667	10.3033	53.4667	10.3467	11.4567	5.44	6.84333	7.33667	10.0067	61.46	21.3733	11.6533	6.74333	7.36	7.22667	7.82667	65.4367	10.3733	8.09667	8.48	8.13	7.23	10.82	73.1867	14.8	12.8933	7.44	8.51667	7.45333	8.89	48.44	10.4933	8.99
537.898	6.98333	7.56333	5.96667	7.36	51.5633	14.6433	8.18	5.54667	4.65333	5.4	7.88	47.8233	13.1167	8.08333	8.08	8.15	7.83	10.2567	53.57	10.5	11.4733	5.55	6.89667	7.34667	10.02	61.4733	21.4167	11.5	6.71333	7.38333	7.47333	7.84333	65.3067	10.5833	8.29	8.23333	8.2	7.10333	10.7967	72.8867	14.8933	12.9533	7.32667	8.38333	7.52333	8.86	48.2833	10.39	8.86
538.239	7.24333	7.55333	6.16667	7.5	51.5867	14.6567	8.28333	5.52333	4.81333	5.64	7.94	47.9433	13.1	8.15333	7.96333	8.27333	7.87	10.3067	53.54	10.66	11.3233	5.72	7	7.31	9.99667	61.3033	21.5467	11.5733	6.75333	7.4	7.65667	7.9	65.32	10.8367	8.50333	8.23333	8.10667	6.96333	10.5267	73.2233	14.7633	12.8033	7.02333	8.11333	7.45667	8.73333	48.42	10.2233	8.91333
538.58	7.24333	7.46	6.21667	7.52	51.3567	14.63	8.27333	5.39	4.83	5.54667	7.92333	47.6433	13.1067	8.00333	7.99	8.28667	7.97	10.1467	53.5333	10.47	11.23	5.77	7.06667	7.15333	9.92333	61.0933	21.3967	11.5233	6.85	7.44667	7.60667	7.94	65.2633	10.8633	8.32333	8.07333	8.20333	7.04667	10.5633	73.0367	14.96	12.7567	6.94333	8.09667	7.33667	8.65667	48.46	10.4167	8.95
538.921	6.77333	7.18333	5.76667	7.41333	51.17	14.45	8.05667	5.34667	4.37	5.20667	7.79	47.46	12.7667	7.64667	7.60667	8.19	7.67333	9.83333	53.5467	10.31	11.0367	5.65	6.87333	6.84333	9.72667	61.0767	21.0267	11.2033	6.56	7.09333	7.37	7.67	64.9467	10.5467	8.21333	7.96333	8.04667	6.88667	10.6167	72.8367	14.8133	12.7033	6.94333	7.87	7.18333	8.61333	48.2267	10.3933	8.89333
539.262	6.72667	7.03667	5.79	7.3	51.3333	14.49	7.88667	4.94	4.23	4.99333	7.53	47.63	12.7467	7.66	7.53667	8.15	7.59333	9.83	53.8533	10.09	10.9433	5.62	6.81667	6.66333	9.66667	61.0667	21.14	11.13	6.35	6.92667	7.11667	7.51	64.9033	10.4267	7.96	7.88	7.93667	6.92333	10.35	73.0467	14.9267	12.7267	6.83	7.88	7.17	8.56667	48.19	10.1033	8.87333
539.602	6.69333	6.98333	5.72333	7.48333	51.3533	14.66	7.94667	4.93667	4.31	5.05	7.72	47.6233	12.6667	7.90333	7.54	8.15	7.62667	10.07	54.1367	10.11	10.9133	5.60333	6.75667	6.69667	9.73	61.3333	21.0667	11.3767	6.48333	7.00667	7.09333	7.49333	65.1833	10.3	7.96	8	7.76333	6.81667	10.18	73.3733	14.6333	12.54	6.76667	7.79333	7.03	8.68667	48.5	9.84667	9.02
539.943	6.61	6.97333	5.70333	7.52667	51.41	14.5933	7.97333	5.05	4.25333	4.90333	7.75333	47.73	12.7867	7.94667	7.66667	8.26	7.72	10.2333	54.25	9.94667	10.8767	5.36667	6.72667	6.84667	9.77	61.6533	21.09	11.4067	6.52667	7.03333	6.91667	7.54	65.4033	10.33	7.96	8.07	7.83667	7.11667	10.44	73.03	14.77	12.5733	7.01	8.05	6.95	8.66	48.2567	10.0033	9.13
540.284	6.63	7.06	5.62667	7.47	51.45	14.47	7.89333	5.08333	4.19333	4.90333	7.56333	47.75	12.7633	7.99667	7.65667	8.2	7.61	10.1033	54.1233	10.0833	10.7333	5.25	6.62333	6.71333	9.63333	61.6567	20.9867	11.3333	6.20667	6.89333	6.85667	7.51667	65.2833	10.2233	7.84333	8.20667	7.79333	7.11	10.38	73.1267	14.5267	12.6467	7.08	8.01333	7.03667	8.59333	48.3333	9.84	9.18333
540.625	6.97	7.43333	6.05667	7.67	51.93	14.7867	8.15667	5.43	4.62667	5.14667	7.93667	48.2633	13.1533	8.29667	8.09333	8.37	8.00667	10.5233	54.49	10.5067	11.0933	5.61667	6.95	7.00667	10.0333	61.8933	21.55	11.74	6.67333	7.33333	7.24333	7.93	65.9233	10.6633	8.22667	8.25333	7.68	7.31667	10.2567	73.2633	14.4933	12.6467	7.14667	8.16	7.05	8.42333	48.5567	9.77667	9.06667
540.965	7.08667	7.52667	6.31333	7.91333	51.87	15.05	8.45667	5.79333	4.96333	5.65	8.21	48.4267	13.56	8.55	8.39	8.75333	8.18333	10.6733	54.3467	10.9	11.3567	6.06333	7.08	7.65667	10.2067	61.8267	21.9633	12.0767	6.86	7.71667	7.73667	8.21667	66.0067	11.0733	8.63333	8.31333	7.74667	7.29	10.4267	73.4333	14.63	12.4633	7.21333	8.2	7.02667	8.72333	48.7433	9.77	8.96
541.306	7.32	7.81667	6.36333	8.03333	51.99	15.16	8.65333	6.03	4.97	5.77333	8.41333	48.7833	13.69	8.71	8.63	9.09	8.34333	10.74	54.39	11.1867	11.62	6.37667	7.27667	7.84	10.37	61.7933	22.1267	12.1433	6.94	7.79667	7.71333	8.49	65.8267	11.3033	8.90667	8.50667	8.07	7.73667	10.83	73.3733	15.1733	12.9767	7.51333	8.6	7.38667	9.03	48.7567	10.47	9.1
541.647	7.35667	7.98333	6.31	8.05333	51.8867	15.2133	8.66	6.03333	4.98667	5.75333	8.50667	48.6	13.7367	8.76667	8.70667	8.93667	8.34	10.63	54.1467	11.0667	11.53	6.53	7.24	7.85667	10.3767	61.6533	22.1067	12.05	6.89	7.81	7.83667	8.55667	65.51	11.4167	8.91333	8.67	8.17333	7.72	10.8667	73.6867	15.45	13.32	7.64333	8.84333	7.57333	9.20667	48.96	10.5067	9.20667
541.987	7.43333	7.93333	6.39333	8.07333	52.0667	15.18	8.86	6.11333	5.00333	5.77667	8.67667	48.98	13.8033	8.90667	8.80667	9.15667	8.37333	10.8233	54.3833	11.1333	11.6967	6.62667	7.37	7.91	10.6333	62.0567	22.37	12.2433	7.03333	7.97	7.89	8.49	65.8167	11.5133	9.07	8.49333	7.85333	7.53333	10.7267	73.7067	15.4933	13.2167	7.41333	8.74667	7.32333	9.28	49.0033	10.3667	8.85
542.328	7.39333	7.75	6.20333	7.94333	51.6067	14.7867	8.69	5.89667	4.76	5.79667	8.51333	48.7367	13.6967	8.82667	8.76	9.04	8.08667	10.59	54.06	10.8167	11.62	6.46333	7.11667	7.70667	10.3633	61.7033	22.2567	12.0467	6.77	7.76	7.71333	8.24333	65.5033	11.3867	8.72667	8.44	7.97	7.38667	10.85	73.4767	15.51	13.4267	7.29667	8.70667	7.43	9.30333	48.8733	10.3533	8.87
542.668	7.33333	7.66	5.99333	7.66333	51.72	14.5733	8.53	5.85	4.53333	5.59	8.44333	48.5333	13.5033	8.55	8.59333	8.71	7.97333	10.45	54.0667	10.4567	11.4367	6.27667	7.06	7.40667	10.2333	61.7333	21.8633	11.7933	6.85333	7.48	7.47	8.13667	65.46	11.1567	8.55	8.48667	8.00667	7.42	11.0133	73.3767	15.51	13.5333	7.31333	8.77	7.46	9.00667	49.02	10.4767	8.92333
543.009	7.22667	7.3	5.83	7.50333	51.6767	14.5267	8.27667	5.65	4.38667	5.58333	8.24667	48.2367	13.6233	8.29667	8.52667	8.44	7.90333	10.21	53.9667	10.1733	11.2433	6.06	7.02333	7.32333	10.1533	61.7733	21.7933	11.55	6.65333	7.45333	7.44667	8.02333	65.5633	11.02	8.34333	8.63333	8.14	7.52667	11.0233	73.5767	15.2833	13.4233	7.48333	8.76	7.59667	8.79667	48.8167	10.54	8.98
543.349	7.35	7.24667	5.98	7.63667	52.1	14.6133	8.43	5.86	4.56	5.87333	8.34333	48.4233	13.6367	8.33	8.63333	8.64	7.92	10.4133	54.3367	10.45	11.6067	6.09667	7.13667	7.43667	10.2367	61.9667	21.8467	11.7833	6.76333	7.50333	7.70667	7.98333	65.82	10.94	8.48667	8.48333	7.87667	7.17	10.8	73.5433	14.7467	13.1767	7.18333	8.38	7.31	8.55667	48.66	10.28	8.78333
543.689	7.27667	7.17	5.66	7.54667	51.81	14.6067	8.03667	5.78333	4.43	5.87	8.15667	48.0733	13.45	7.99333	8.35	8.41667	7.88667	10.2667	54.2467	10.1933	11.4167	5.91333	6.94667	7.54333	9.94	61.84	21.4967	11.5733	6.53	7.41667	7.60333	8.01667	65.7467	10.62	8.54	8.72333	8.22333	7.60667	11.0967	73.5533	15.0133	13.2933	7.5	8.67	7.62333	8.94333	48.61	10.45	8.99667
544.03	7.30667	7.15333	5.80333	7.72	52.17	15.0067	8.22667	5.82333	4.43	5.85333	8.30333	48.3667	13.5233	8.21667	8.18333	8.54667	8.19	10.37	54.6933	10.4767	11.3267	5.98333	7.07667	7.79667	10.0933	62.3433	21.4433	11.6	6.6	7.47667	7.69	8.18667	65.8633	10.6333	8.86	8.84333	8.41667	7.69333	10.9533	73.9	15.2833	13.26	7.61667	8.73	7.46	9.20333	48.8167	10.5467	9.10667
544.37	7.26333	7.18667	5.89667	7.73	52.1633	14.8533	8.18	5.74	4.47	5.76333	8.22	48.5633	13.6	8.32	8.19	8.66333	8.30333	10.4167	54.69	10.53	11.4	5.9	7.09	7.84667	10.1167	62.5867	21.4167	11.65	6.49667	7.43333	7.76	8.09667	66.2267	10.7033	8.82333	8.79	8.53	7.72	10.75	74.3567	15.11	13.27	7.48333	8.52	7.56	9.28	48.8567	10.5933	9.04
544.71	7.47667	7.54667	6.21667	7.95667	52.1533	14.9133	8.45333	5.92667	4.76667	5.85333	8.4	48.85	13.6267	8.67	8.42333	8.94	8.58	10.7733	54.92	10.76	11.6633	6.14667	7.34333	8.01333	10.3333	62.8267	21.6467	12.0867	6.74	7.72667	7.94	8.18667	66.4267	10.9733	8.96333	8.51667	8.42333	7.51	10.6467	74.2633	15.0967	13.2133	7.24333	8.41667	7.23	9.27667	48.8333	10.1433	8.97333
545.05	7.23	7.45	5.94667	7.50333	51.49	14.6733	8.08	5.59333	4.5	5.48333	8.14667	48.62	13.3467	8.54333	8.12667	8.79	8.48333	10.58	54.4167	10.3867	11.4367	6.15667	7.29333	7.84333	10.2133	62.2433	21.49	11.8067	6.46667	7.50667	7.56	8.15	66.1033	10.8033	8.68667	8.57	8.64667	7.86667	10.99	74.2267	15.4367	13.5	7.44333	8.56333	7.57	9.35667	49.04	10.3867	9.15333
545.391	7.07667	7.43667	5.91667	7.45667	51.4867	14.6167	8.22	5.49333	4.29667	5.32667	8.05667	48.8867	13.4767	8.59667	7.98667	8.82667	8.45667	10.69	54.62	10.3867	11.3233	6.17333	7.31667	7.63667	10.1833	62.2167	21.4967	11.5667	6.46	7.43667	7.57667	7.97667	65.9967	11.0267	8.64667	8.19333	8.39	7.44333	10.8033	74.02	15.2167	13.2433	7.23	8.38	7.23667	8.97333	48.95	10.26	9.09333
545.731	7.05333	7.46333	5.84333	7.29	51.07	14.4233	8.09	5.43	4.20333	5.20667	7.88333	48.5167	13.25	8.36333	7.98333	8.69667	8.11333	10.6733	54.37	10.1	11.11	6.06	7.25	7.49333	10.0267	61.95	21.4767	11.5967	6.51667	7.23667	7.54333	7.88	65.9667	10.9167	8.50667	7.94333	8.00667	7.23667	10.7767	73.8933	14.8433	13.0933	7.13	8.19	7.11	8.70333	48.9167	10.1867	8.94
546.071	6.76333	7.24667	5.57	7.10667	50.54	14.29	7.83333	5.19667	4.04667	4.94	7.53667	48.1833	13.0067	8.13	7.77333	8.39667	7.78333	10.28	54.1133	9.79	10.8	5.73	7.1	7.1	9.85	61.5067	21.3767	11.2067	6.28667	6.97	7.16	7.64	65.2633	10.5267	8.22333	7.84667	7.77	7.06333	10.78	73.4167	14.7367	12.9533	6.96667	8.14333	6.90333	8.35	48.77	9.95	8.87667
546.411	6.73	7.21667	5.71667	7.08333	50.6833	14.2967	7.94667	5.15	4.07	4.85667	7.50333	48.3333	12.9333	8.14	7.65667	8.29	7.70667	10.36	54.1033	9.7	10.59	5.63333	7.20333	7.22667	9.88	61.4633	21.3267	11.08	6.46667	6.93667	7.33333	7.62333	65.2133	10.6633	8.44	7.80333	7.63333	7.06	10.9067	73.65	14.7233	12.9267	6.88	7.94	6.95667	8.22333	48.9933	10.1033	8.78667
546.751	6.56667	7.05	5.75667	7.11	50.67	14.3033	8.01333	5.18667	3.88667	4.81667	7.39333	48.3367	12.9933	8.11	7.59	8.01667	7.58667	10.17	54.34	9.78	10.43	5.34667	7.2	7.26667	9.87667	61.8833	21.21	11	6.52	6.88333	7.45	7.50333	65.4133	10.6733	8.38667	7.82333	7.53667	6.79	10.6967	73.7567	14.6567	12.6833	6.87	7.92	6.85667	8.38667	48.9367	10.0567	8.53333
547.09	6.83667	7.26	6.09667	7.42667	51.0167	14.4967	8.28	5.53	4.32	5.03	7.75	48.59	13.0967	8.39333	8.04	8.22333	7.77667	10.3933	54.6367	10.2267	10.7567	5.63	7.43	7.60667	10.1767	62.11	21.5067	11.43	6.99	7.03333	7.63333	7.69	65.8	10.8033	8.53333	8.24	7.94	7.22667	10.9133	74	14.9367	13.0533	7.25333	8.28667	7.32333	8.66333	49.4267	10.3733	8.92667
547.43	6.96	7.33	5.99667	7.61	51.27	14.59	8.40667	5.61333	4.43	5.09	7.94	48.8167	13.31	8.50333	8.33	8.39667	7.93667	10.48	54.6967	10.2533	10.92	5.64667	7.56333	7.58667	10.36	62.02	21.5133	11.3867	7.04667	7.29333	7.69333	7.78	65.91	10.94	8.62667	8.53	8.18333	7.49667	11.19	74.26	15.3133	13.1767	7.31667	8.58333	7.47667	8.68333	49.73	10.54	9.16333
547.77	7.27	7.65667	6.3	7.92667	51.97	14.9533	8.77	5.89333	4.57333	5.47333	8.47667	49.21	13.6833	8.75333	8.60667	8.80667	8.28667	11.0133	55.2867	10.6933	11.2633	6.15667	7.59667	7.93333	10.6033	62.6267	21.74	11.8133	7.38333	7.82667	8.04667	8.07333	66.55	11.3467	9.05	8.52667	8.23	7.58	11.1667	74.36	15.4533	13.2533	7.46333	8.67	7.49333	8.95333	49.8167	10.6867	9.27333
548.11	7.04	7.36333	5.87333	7.64333	51.6633	14.8867	8.43667	5.62667	4.16333	5.3	8.15667	48.7833	13.4467	8.44	8.34667	8.64	7.99333	10.6567	55.21	10.53	10.9967	6.01333	7.26667	7.71	10.2833	62.5533	21.5367	11.5667	7.08667	7.46	7.51667	7.89333	66.38	11.0067	8.52333	8.56	8.43333	7.68333	10.97	73.88	15.6867	13.2567	7.62667	8.92667	7.43333	8.97667	49.72	10.67	9.25667
548.45	7.21333	7.44667	5.87	7.81667	52.02	14.9867	8.51	5.58333	4.25333	5.25333	8.19333	49.0633	13.63	8.5	8.43333	9.00667	8.22333	10.9433	55.4467	10.5433	11.0367	6.04333	7.23	7.59333	10.3167	62.7867	21.7233	11.6633	7.15	7.49333	7.46667	7.84333	66.57	11.12	8.71667	8.65	8.6	8.07333	11.0467	73.8733	15.9233	13.48	7.79333	9	7.66	9.11333	49.7967	10.8367	9.44333
548.789	7.04	7.19	5.53	7.63667	51.7067	14.81	8.26	5.18667	3.96333	4.96	7.86	48.8867	13.5267	8.25	8.17	8.76667	8.03667	10.5533	55.25	10.0433	10.6933	5.71	7.06333	7.29667	10.18	62.6633	21.41	11.4333	6.79	7.35	7.21333	7.63	66.34	10.9467	8.56	8.37667	8.31	7.76	10.85	74.1967	15.5867	13.3367	7.43333	8.68667	7.45667	8.94667	49.45	10.5867	9.01
549.129	6.82	6.91667	5.49	7.35333	51.5633	14.6067	8.03333	4.93333	3.88333	4.93	7.65	48.78	13.3433	8.2	7.79667	8.47	7.83	10.2767	55.2933	10.04	10.57	5.75667	6.75	7.26	10.0133	62.9233	21.2367	11.3267	6.50333	7.11667	7.01667	7.34333	66.3067	10.68	8.46667	8.27	8.19333	7.69667	10.5367	74.29	15.3733	13.5233	7.55667	8.52	7.45667	9.00667	49.3233	10.35	8.81667
549.469	6.86667	7.05667	5.39333	7.33333	51.3467	14.4767	7.97667	4.91667	3.85333	4.75667	7.32	48.7833	13.2467	8.19667	7.82333	8.45	7.78333	10.0667	55.15	10.0833	10.4467	5.54333	6.89333	7.24333	10.0867	62.9367	21.18	11.1967	6.34333	7.02	7.04	7.31	66.17	10.58	8.42	8.47333	8.39667	7.84	10.56	74.23	15.5133	13.5233	7.78667	8.78333	7.71	9.16667	49.27	10.54	8.95333
549.808	6.78333	7.18333	5.56	7.46667	51.3967	14.4967	7.84333	4.94333	3.95667	4.74667	7.52667	49.0433	13.4533	8.24	7.87667	8.52667	7.85667	10.25	55.2467	10.16	10.5433	5.48333	6.76667	7.17667	10.2933	63.0767	21.28	11.2	6.31667	6.98	7.18333	7.3	66.25	10.5833	8.67	8.58333	8.51333	7.91333	10.7467	74.7933	15.57	13.7367	7.88	8.83667	7.88333	9.38667	49.3433	10.8033	9.27333
550.148	6.96667	7.33333	5.70333	7.59667	51.3667	14.6233	8.03	5.15	4.25333	5.01	7.67	48.99	13.4267	8.21667	7.97667	8.69333	7.96333	10.4367	55.3367	10.3367	10.7	5.77667	6.89	7.42667	10.4433	62.87	21.2167	11.1567	6.48	7.20333	7.50333	7.54333	65.9767	10.84	8.76667	8.44	8.41333	7.85	10.83	75.1767	15.5033	13.6933	7.85	8.74667	7.78667	9.37	49.6	10.8	9.28667
550.487	6.87333	7.36667	5.81333	7.42667	51.2967	14.5	7.92333	5.23667	4.11333	5.07333	7.63333	48.6333	13.48	8.28667	7.92667	8.78	7.89	10.58	55.2533	10.3833	10.8633	5.82333	6.91333	7.42333	10.43	62.7633	21.3333	10.95	6.34333	7.17333	7.44333	7.59	65.8367	10.8133	8.77	8.51667	8.53667	7.80667	11	74.9433	15.5067	13.7333	7.9	8.76333	7.87667	9.38333	49.51	10.94	9.53667
550.827	7.16	7.85667	6.1	7.83667	51.72	14.83	8.16667	5.56667	4.32	5.24667	7.83333	49.0033	13.9267	8.46667	8.24667	9.15	8.21333	11.0833	55.53	10.54	10.9867	5.95	7.34667	7.64	10.78	63.08	21.5967	11.1133	6.73	7.46667	7.71	8.05667	66.0867	11.2033	8.98333	8.67333	8.77667	7.71667	11.2933	74.7467	15.6733	13.59	7.85667	8.77667	8.00667	9.39667	49.47	11.13	9.61667
551.166	7.19333	7.59	6.24	7.89333	51.65	14.9033	8.25667	5.71667	4.38667	5.28	8.08667	48.7767	13.8567	8.59	7.99333	9.10333	8.15	11.23	55.5533	10.3933	10.9967	5.93	7.31333	7.59	10.6667	62.8733	21.7067	11.0833	6.74667	7.34667	7.72667	8.14	66.06	11.2267	8.97667	8.55333	8.62667	7.64667	11.3833	74.9467	15.4233	13.7233	7.57667	8.46667	7.9	9.31667	49.47	11.0333	9.42333
551.505	7.38667	7.66667	6.30333	7.92333	51.8333	14.91	8.47667	5.87	4.59667	5.32667	8.06333	48.9667	13.87	8.83333	7.88667	9.22667	8.20667	11.3167	55.8933	10.3833	11.0467	6.11333	7.48667	7.71333	10.5567	63.0767	21.8533	11.22	6.76	7.60667	7.83	8.28333	66.2267	11.3233	8.97667	8.73	8.66	7.76333	11.5	74.76	15.4133	13.6433	7.52667	8.66333	8.04333	9.38333	49.6933	10.9667	9.43333
551.844	7.49667	7.73	6.26333	7.95	51.7933	14.8	8.30333	5.84333	4.40333	5.3	7.96667	48.81	13.77	8.89333	7.89667	9.17	8.09	11.2067	55.8633	10.32	11.0067	6.07333	7.37	7.61667	10.57	63.1267	21.92	11.36	6.65	7.54667	7.77667	8.23	66.12	11.09	9.00667	8.63	8.55333	7.57	11.31	74.4767	15.17	13.6267	7.39667	8.66667	7.89333	9.11333	49.4867	10.74	9.33
552.184	7.62	7.94667	6.41333	8.22667	51.7333	14.91	8.33	5.87	4.61667	5.49333	8.13667	48.95	13.8233	8.97667	8.04333	9.18667	8.16333	11.2633	55.78	10.49	10.9967	6.17	7.43667	7.7	10.4433	63.14	21.8367	11.6633	6.91333	7.64333	7.99667	8.39667	65.8967	11.2867	9.04	8.66333	8.60667	7.85667	11.46	74.6633	15.35	13.6567	7.49333	8.79	7.96667	9.24667	49.86	10.81	9.40667
552.523	7.38667	7.68333	6.19	7.98	51.4667	14.6633	8.09333	5.69333	4.47	5.07667	7.91667	48.47	13.5	8.72	7.76333	8.94	7.94	10.99	55.4433	10.2933	10.6767	5.95333	7.24	7.67333	10.11	62.77	21.5433	11.56	6.72333	7.47	7.76667	8.09667	65.5067	11.0167	8.77	8.63	8.68667	8.10667	11.3433	74.67	15.34	13.9233	7.65	8.89667	7.90333	9.57333	49.92	10.93	9.66333
552.862	7.41333	8.00667	6.31667	8.11	51.5533	14.6733	8.12333	5.61333	4.57333	5.26333	7.95333	48.6133	13.8733	8.73	8.13333	8.99	8.1	11.1833	55.6067	10.3367	10.8467	6.14333	7.44333	7.78	10.24	62.8633	21.68	11.8233	6.96667	7.71333	7.81	8.18	65.77	11.31	9.04	8.45333	8.54	7.98	11.3033	74.5567	15.29	13.8633	7.68	8.79667	7.69667	9.42	49.91	10.7433	9.51667
553.201	7.32333	7.84	6.27	8.10333	51.4433	14.6133	7.93	5.48	4.42	5.22	7.93	48.19	13.9233	8.51333	8.1	8.76667	8.04	11.0067	55.3833	10.3467	10.7067	5.91667	7.32	7.72667	10.1433	62.3333	21.3533	11.6167	6.8	7.55667	7.70333	8.18	65.6567	11.2833	8.98	8.29667	8.42333	7.84333	11.2133	74.4667	15.1733	14.0033	7.7	8.73667	7.64333	9.4	49.8067	10.62	9.46667
553.54	7.20667	7.75	6.19	7.88333	51.3233	14.3933	7.82667	5.26667	4.45333	5.13333	7.87	48.14	14.03	8.45333	8.07667	8.58	8.11	10.79	55.2933	10.2667	10.4867	5.63333	7.46333	7.68	10.0233	62.1733	21.31	11.5633	6.79	7.49333	7.55	8.06333	65.97	11.3767	8.9	8.53	8.35667	7.9	10.9867	74.6433	15.1567	13.8633	7.57667	8.60333	7.57333	9.35	50.0267	10.66	9.50333
553.879	7.47333	7.84667	6.29333	8	51.5133	14.4833	8.07333	5.34	4.72333	5.2	7.98	48.29	14.1667	8.62333	8.10333	8.69	8.31667	10.9967	55.5233	10.2567	10.5867	5.72333	7.59333	7.85	10.2867	62.24	21.44	11.62	6.98333	7.67667	7.61	8.15	66.2533	11.4033	9.02333	8.62667	8.43	7.79333	10.6133	74.9133	15.0033	13.87	7.51333	8.39667	7.48	9.19	50.2533	10.6633	9.40333
554.218	7.65333	8.1	6.57333	8.11667	51.4667	14.7933	8.24	5.55667	4.80333	5.67333	8.22333	48.6033	14.2867	8.81667	8.35	8.94	8.66	11.1733	55.77	10.3467	10.7367	5.92333	7.82667	7.89667	10.5833	62.31	21.7033	11.74	7.03333	7.91333	7.79667	8.35	66.26	11.5033	9.24	8.51667	8.03667	7.35667	10.5167	74.8867	14.8233	13.4867	7.24667	8.07	7.43	8.69333	49.96	10.3567	9.02
554.557	7.42	7.85667	6.08333	7.83	51.0767	14.5133	7.88333	5.44	4.4	5.40333	8.06333	48.4133	13.7867	8.65333	7.99	8.76333	8.44	10.8667	55.31	10.1	10.35	5.7	7.46667	7.74333	10.3667	62.0533	21.3133	11.4367	6.78667	7.73	7.59667	7.92667	65.7833	11.21	8.93333	8.76	8.24667	7.6	10.8067	75.0767	15.06	13.5167	7.52	8.26667	7.70333	9.08667	50.1967	10.4667	9.43333
554.896	7.43667	8.08667	6.15667	7.79667	51.1933	14.5633	8.10333	5.50667	4.52333	5.49	8.22667	48.89	13.82	8.83	8.19333	8.81667	8.62333	10.98	55.64	10.1067	10.53	5.92667	7.69667	7.78	10.5333	62.51	21.4467	11.5767	7.11667	7.8	7.75667	7.86333	65.9233	11.2733	9.15333	8.98667	8.34333	7.83333	10.9633	75.43	15.2233	13.6533	7.64333	8.25667	7.83333	9.41333	50.4167	10.7	9.67333
555.235	7.58	8.32667	6.39333	8.03667	51.54	14.87	8.47667	5.76333	4.65667	5.69333	8.54333	49.31	14.0233	9.04667	8.42	9.01333	8.57667	11.3433	56.17	10.3833	10.7867	6.15333	7.87667	7.76333	10.6933	62.8833	21.6133	11.7033	7.3	8.12667	7.96667	8.14667	66.04	11.3433	9.22	8.91333	8.56	7.90333	11.2033	75.3733	15.5433	13.9333	7.75333	8.60333	8.03333	9.72	50.3067	10.7933	9.87333
555.574	7.58333	8.33	6.44	8.13667	51.5867	14.93	8.35	5.93333	4.73333	5.77667	8.73333	49.6467	14.0033	9.03	8.58667	8.99333	8.64	11.4167	56.31	10.5167	10.8267	6.21	7.9	7.91667	10.86	63.28	21.88	11.7233	7.25	8.19	8.04333	8.21333	66.17	11.5767	9.25	8.57	8.24	7.70667	11.23	74.7933	15.39	13.86	7.70333	8.66	7.85333	9.69667	49.8167	10.6867	9.64333
555.912	7.78333	8.24333	6.4	8.25667	51.8333	14.8367	8.40333	5.91667	5.01333	5.74333	8.61333	49.6733	14.2033	9.1	8.68	8.97333	8.65333	11.51	56.3567	10.54	11.0133	6.27333	7.87333	7.98667	10.85	63.4867	22.0033	11.7867	7.46	8.31667	8.16667	8.32	66.5067	11.78	9.37	8.39333	8.41333	7.99333	11.24	74.85	15.4533	14.0267	7.70667	8.95333	7.89333	9.88333	49.9967	10.7833	9.77
556.251	7.89667	8.45667	6.89	8.36333	52.09	15.1733	8.55	6.07	5.29	5.99667	8.69667	49.8733	14.51	9.28667	8.79	9.04667	8.81667	11.8267	56.92	10.8067	11.2833	6.30667	8.14333	8.17	11.0433	63.9533	22.1933	11.93	7.56667	8.41333	8.34667	8.63333	66.7367	11.9333	9.58667	8.54333	8.53	8.13333	11.1267	74.91	15.7	14.5	7.81667	9.30333	8.09333	9.85	50.06	11.1267	9.87333
556.59	8.02	8.34333	6.95667	8.63667	52.1333	15.2433	8.63333	6.19333	5.39333	6.18667	8.53333	49.72	14.67	9.34333	8.88333	9.35333	8.79333	11.92	56.7967	10.83	11.3467	6.24	8.2	8.28333	11.18	63.9333	22.2533	11.9233	7.63667	8.62333	8.43667	8.9	66.79	12.05	9.55667	8.38333	8.42667	7.98667	11.0533	75.1667	15.87	14.3033	7.66333	9.20333	7.94667	9.43	50.1267	10.8633	9.65
556.928	7.92	8.27333	6.83	8.73	52	15.14	8.39333	6.18667	5.32	6.16667	8.51667	49.5133	14.6333	9.3	8.74333	9.49333	8.99333	11.9433	56.38	10.8767	11.3233	6.32667	8.08	8.55	11.17	63.8133	22.2233	11.92	7.60333	8.58	8.37333	8.85667	66.58	12.0633	9.61333	8.19	8.46	7.92	10.9467	74.7133	15.61	14.0367	7.59667	8.88667	7.80333	9.19	49.9	10.8133	9.41333
557.267	7.58	8.23333	6.60667	8.42	51.7933	14.9767	8.27333	6.10667	5.01667	5.92333	8.25	49.21	14.5467	9.16	8.44	9.52333	8.78333	11.7767	56.3	10.6233	11.0233	6.1	8.02333	8.39333	10.8833	63.4833	21.7567	11.6367	7.48333	8.52667	8.33667	8.57333	66.35	11.64	9.60667	8.08333	8.62333	7.93	10.99	75.13	15.6767	13.9933	7.52667	8.81667	7.8	9.07333	50.0933	10.83	9.51667
557.605	7.38	8.11667	6.57333	8.39667	51.7633	14.7967	8.16333	6.02333	4.68333	5.86	8.31333	49.14	14.2033	9.04	8.16667	9.42	8.75333	11.6667	56.5133	10.5767	10.87	5.98333	7.94667	8.19	10.7467	63.4833	21.58	11.4833	7.19	8.33333	8.18333	8.45	66.2667	11.4467	9.51333	7.91667	8.61333	7.74333	10.9233	75.23	15.5967	13.87	7.41	8.65667	7.71	8.93333	50.1933	10.6633	9.31
557.944	7.42333	8.03667	6.57333	8.51667	51.72	14.6133	8.19333	6.08333	4.73667	5.72667	8.40667	49.2967	14.0867	9.13	8.09333	9.50667	8.65333	11.57	56.1667	10.46	10.8167	6.13	8.06	8.21	10.89	63.4433	21.61	11.3933	7.17333	8.26667	8.25333	8.67	66.34	11.42	9.43667	7.71667	8.50667	7.50333	10.6867	75.2367	15.3133	13.4433	7.17333	8.32667	7.36333	8.89333	50.19	10.3333	9.15667
558.282	7.30667	8.09667	6.47	8.47333	51.6867	14.54	8.01667	6.15333	4.72333	5.74333	8.65333	49.2533	13.92	9.09	7.99	9.48333	8.54667	11.53	56.09	10.4533	10.62	6.08333	8.07333	8.23667	10.8967	63.54	21.57	11.3467	6.99667	8.27	8.08	8.62333	66.3867	11.3567	9.48	7.66667	8.38333	7.32667	10.3433	74.7967	15.05	13.4067	7.00667	8.14667	7.31	8.94	49.94	10.3167	9.00333
558.621	7.31	8.01	6.51333	8.47667	51.5567	14.4833	8.14667	6.22667	4.84	5.77333	8.59667	49.3367	13.8533	9.22667	7.91667	9.31333	8.57667	11.3667	56.3133	10.35	10.5733	6.23	8.11333	8.13333	10.9633	63.6767	21.5967	11.26	7.02	8.21667	8.07667	8.67667	66.65	11.5433	9.54667	8.01667	8.33	7.52667	10.64	75.4933	15.2267	13.69	7.31333	8.41	7.55	9.18333	50.6067	10.5567	9.19333
558.959	7.51333	7.95333	6.47667	8.57333	51.5667	14.5	8.29667	6.11333	4.82333	5.86	8.63667	49.3033	13.8367	9.27667	7.92333	9.23	8.73	11.3833	56.1267	10.3733	10.67	6.32667	8.36667	8.22	11.23	63.9067	21.8333	11.31	7.10667	8.19333	7.93667	8.84	66.9067	11.74	9.49333	8.32667	8.49667	7.82	10.8733	75.4467	15.46	13.7633	7.62	8.64667	7.82	9.52667	50.7867	10.6233	9.34667
559.297	7.31667	7.91667	6.26	8.29	51.2	14.4033	8.15	5.88667	4.75333	5.72333	8.51	49.29	13.8667	9.12667	7.98333	9.27333	8.56667	11.2967	55.94	10.2267	10.5367	6.3	8.28667	8.25667	11.2133	63.93	21.5633	11.2	7.05667	8.13333	8.00333	8.64667	66.77	11.6967	9.47333	8.56	8.71333	8.06667	11.1067	75.2133	15.5533	14	7.92	8.63333	7.94	9.70333	50.85	10.8033	9.73
559.636	7.22	7.85	5.91333	8.10667	51.2633	14.3	8.11	5.81	4.58	5.42	8.25	49.23	13.8	8.79667	7.86	9.23	8.49	11.2133	55.9367	10.18	10.29	6.18333	8.18	8.20333	11.04	63.71	21.3533	11.1167	6.99333	8.18333	7.91333	8.5	66.6967	11.6267	9.46333	8.45	8.75667	8.18333	11.1767	75.24	15.65	14.0633	7.77	8.64667	8.04333	9.47	50.85	10.8833	9.6
559.974	7.41333	7.88	5.88	7.99333	51.07	14.3567	8.08667	5.79333	4.52333	5.17333	8.13667	49.2033	13.73	8.76333	7.83333	9.09667	8.65667	11.35	56.02	10.05	10.3667	6.26333	8.13	8.19333	11.0067	63.5933	21.21	11.1933	7.01667	8.20333	7.93667	8.49	66.4633	11.6133	9.37333	8.39667	8.99333	8.36667	11.3733	75.5133	15.76	14.1767	8.03	8.98667	8.14667	9.66	51.1133	11.0633	9.70667
560.312	7.28	7.68667	5.79	7.68667	50.89	14.1733	7.73	5.27	4.21333	4.92	7.84	49.0133	13.5533	8.41667	7.75667	8.99333	8.26667	11.2233	55.8967	9.63667	10.0067	5.78333	7.89	7.98667	10.8433	63.65	20.9067	11.1467	6.72333	8.01667	7.70667	8.28667	66.2033	11.1067	9.07	8.47333	9.26333	8.45667	11.4767	75.39	15.9867	14.3033	7.96333	9.25	8.29	9.81667	51.03	11.07	9.94667
560.65	7.26333	7.70333	6.08667	7.88333	51.0933	14.2267	7.82667	5.44333	4.29333	5.03333	7.94	49.2067	13.65	8.48	7.85667	9.10667	8.35333	11.39	56.3467	9.76333	10.1667	6.03333	7.8	7.93	10.8533	63.73	20.8467	11.2833	6.83667	8.07667	7.88333	8.52	66.2033	11.1467	9.17	8.51	9.35	8.45333	11.3667	75.5633	16.0333	14.3933	7.87	9.30333	8.23333	9.68667	50.9833	11.1033	9.87667
560.988	7.54	7.73333	6.31	8.10667	51.36	14.45	7.95667	5.77667	4.47333	5.28	8.21333	49.2967	13.88	8.69	7.83333	9.16667	8.64333	11.6433	56.44	9.88	10.32	6.25667	7.94	8.01667	11.13	63.8533	21.1567	11.5	7.07	8.2	7.98667	8.80333	66.41	11.2833	9.34667	8.75333	9.28667	8.45333	11.46	76.0767	16.2367	14.4533	7.82	9.62333	8.62333	9.89667	51.1867	11.2367	10.0267
561.326	7.56	7.7	6.39667	8.17	51.2067	14.56	7.78667	5.67333	4.59333	5.57333	8.38333	49.1967	14.0967	8.92667	8.03667	9.01333	8.72667	11.7333	56.7767	9.89333	10.54	6.24667	7.99	7.97667	11.2467	63.9567	21.07	11.7	7.16333	8.27333	7.91	8.85667	66.46	11.37	9.37667	8.73	9.25	8.28333	11.5267	75.95	16.02	14.46	7.83333	9.52667	8.58667	10.0767	51.23	11.22	10.09
561.664	7.46667	7.93	6.69	8.32667	51.3367	14.6667	7.89667	5.81333	4.78667	5.90333	8.41	49.5033	14.2567	9.09333	8.17667	9.16667	8.68667	11.7233	56.8867	10.0867	10.6733	6.37333	8.02333	8.08333	11.48	64.18	21.3	11.8033	7.33667	8.30667	8.06	9.02667	66.79	11.4233	9.68667	8.69333	9.20333	8.05	11.5933	75.6633	15.9567	14.37	7.66	9.26333	8.43333	9.77333	51.09	11.0567	10.0933
562.002	7.75	8.18	6.82333	8.62333	51.63	14.9633	8.26667	6.22333	5.09333	6.07333	8.78333	49.8633	14.5767	9.36	8.39333	9.40333	8.98	12.05	57.1967	10.38	10.9267	6.72	8.32	8.4	11.6667	64.2567	21.4867	11.9467	7.67	8.51667	8.33667	9.26667	67.0367	11.77	10.0033	8.34	8.94667	7.84667	11.37	75.6433	15.5367	14.2067	7.65	9.12333	8.19667	9.31	50.9733	10.88	9.72333
562.34	7.94	8.34333	6.99333	8.62333	51.8167	15.1333	8.33667	6.26	5.32667	6.14667	9.01667	50.03	14.7967	9.64	8.57	9.52333	9.01	12.0833	57.31	10.55	10.9433	6.70333	8.50333	8.69667	11.5833	64.6167	21.72	12.2033	7.66667	8.61333	8.53333	9.30333	67.2933	11.9433	10.1033	8.50667	8.90667	7.84	11.5767	75.5333	15.6633	14.42	7.65333	9.2	8.22667	9.48333	51.0567	10.96	9.78667
562.678	8.03	8.57667	7.08333	8.71333	51.7733	15.1233	8.55	6.25	5.47333	6.05667	9.08333	50.3733	14.78	9.72333	8.91667	9.65333	8.95	12.1667	57.4567	10.4633	10.9167	6.79333	8.74	8.85667	11.6167	64.7	21.7333	12.23	7.66	8.83667	8.61333	9.37667	67.32	11.9533	10.1733	8.25667	8.89	7.76333	11.4167	75.2333	15.35	14.3	7.67333	8.98667	7.94667	9.35333	50.9333	10.8933	9.58667
563.016	7.85333	8.45333	7.04667	8.71667	51.8	14.9067	8.62	6.30333	5.27667	5.94667	8.99	50.4667	14.7033	9.52	8.81333	9.79667	8.92333	12.1	57.2533	10.3467	10.5467	6.67667	8.71333	8.74	11.3033	64.91	21.73	12.1033	7.50667	8.69667	8.69	9.17667	67.5567	11.74	9.91	8.10333	8.7	7.48	11.1067	75.0967	15.16	14.25	7.48667	8.93	7.72333	9.03	50.6767	10.71	9.38667
563.354	7.77	8.25667	6.72667	8.42	51.8933	14.73	8.52	5.99667	4.96667	5.57333	8.82	50.45	14.5033	9.24333	8.73	9.74667	8.70333	12.1433	57.1833	10.0767	10.29	6.54	8.65	8.48	10.9867	64.97	21.6067	11.91	7.25667	8.38333	8.65667	8.93667	67.59	11.5567	9.59333	8.28667	8.97333	7.81667	11.29	75.3	15.1433	14.39	7.62	9.12	8.02333	9.24333	50.9467	11.0333	9.68333
563.691	7.49333	8.24333	6.72667	8.23667	51.5033	14.5667	8.29	5.97667	4.77	5.45333	8.63333	50.0533	14.29	9.15	8.63333	9.66333	8.67	11.9933	56.9267	9.91333	10.1933	6.44667	8.36667	8.22333	10.8333	64.8267	21.53	11.6567	7.17333	8.33333	8.49	8.76333	67.2767	11.2733	9.64	8.37333	8.98333	7.79	11.38	75.5233	15.2433	14.2967	7.39333	8.97333	7.92333	9.36	50.93	11	9.86667
564.029	7.14667	8.05	6.28333	8.04667	51.2967	14.19	7.98333	5.63667	4.42	5.26333	8.16	49.8067	13.9433	8.92	8.37667	9.38	8.45333	11.7867	56.9133	9.54333	9.79	6.07667	8.07667	7.90333	10.8033	64.4967	21.29	11.23	6.98333	8.13	8.19667	8.41	66.8933	11.04	9.16333	8.23	8.93333	7.63333	11.25	75.6733	15.0767	14.1267	7.52	8.83333	7.89667	9.19667	51.0067	10.79	9.93667
564.367	6.88333	7.78333	5.96	7.82333	51.3033	14.0367	7.65333	5.43333	4.1	4.96333	7.77667	49.7033	13.83	8.79	8.06667	9.13	8.22333	11.6033	56.8933	9.57	9.70667	5.71	7.71	7.73333	10.51	64.6867	21.0533	11	6.81	7.87333	7.90333	8.07333	66.8433	10.98	8.95667	8.40333	9.13333	7.75667	11.2633	75.7333	15.1567	14.2	7.51667	8.98667	7.93	9.11667	50.94	10.7067	9.97
564.704	7.25667	8.16333	6.36	8.12667	51.4	14.3933	7.98667	5.58	4.41333	5.16667	8.21667	49.8167	13.9833	9.14667	8.32333	9.34667	8.59	11.8667	57.2467	9.72333	10.12	5.99	7.95	8.13333	10.95	64.6433	21.54	11.1967	7.19333	8.25333	8.11333	8.40333	66.6633	11.36	9.39333	8.66	9.3	8.19	11.7	76.16	15.45	14.2033	7.78667	9.18	8.2	9.52667	51.32	10.94	10.29
565.042	7.41	8.14333	6.60667	8.37333	51.19	14.4267	8.05	5.70667	4.61333	5.29333	8.42333	49.96	14.1633	9.3	8.40333	9.39667	8.74667	11.7933	57.57	9.82333	10.1433	6.17333	8.14	8.30667	11.1067	64.94	21.67	11.37	7.35667	8.51	8.13	8.58333	66.8667	11.4733	9.60333	8.59	8.98667	8.23	11.6267	76.3233	15.4333	14.1633	7.66667	9.08	8.06333	9.47	51.0333	10.8333	10.1333
565.379	7.54	8.11667	6.58333	8.61667	51.5067	14.4333	8.17667	5.64	4.75667	5.46	8.56667	50.2667	14.4433	9.31	8.37667	9.57	8.74	12.0433	57.7	9.86667	10.1833	6.28333	8.57333	8.49333	11.29	65.1433	21.59	11.5	7.49333	8.52333	8.36	8.85667	67.1633	11.58	9.51333	8.66667	9.13667	8.36667	11.6567	76.1267	15.5667	14.3	7.84667	9.14333	8.27	9.58333	51.1467	10.94	10.3333
565.717	7.60333	7.95667	6.49	8.44667	51.27	14.3533	8.16667	5.59333	4.69333	5.33	8.74	50.2133	14.33	9.16333	8.3	9.70333	8.64667	12.0733	57.3267	9.85	10.09	6.36333	8.39667	8.48	11.2367	65.2033	21.37	11.53	7.40667	8.50333	8.24333	8.8	67.0733	11.42	9.59333	8.51333	8.93333	8.33	11.5067	76.2133	15.4367	14.0867	7.58667	9.18333	8.04333	9.59667	51.15	10.97	10.2367
566.054	7.59	7.88667	6.51667	8.45667	51.1933	14.1433	8.19333	5.49667	4.68	5.39333	8.77333	49.9433	14.2	9.02	8.23667	9.79	8.80333	12.05	57.4333	9.58	9.96667	6.31333	8.35333	8.29333	11.2	65.0633	21.2667	11.5167	7.40333	8.41333	8.13	8.79333	66.99	11.3267	9.49	8.45667	8.48667	8.08	11.3967	76.34	15.44	14.0033	7.31333	8.89	7.86	9.47333	51.3433	11.0667	10.16
566.391	7.62	7.94667	6.45333	8.37333	51.26	14.0533	8.32	5.54667	4.71	5.42667	8.61667	49.9433	14.22	8.96333	8.38	9.8	8.73	12.15	57.4867	9.66667	9.96667	6.28333	8.3	8.35333	11.1267	65.2433	21.17	11.43	7.33667	8.29333	8.18	8.85667	67.1233	11.26	9.53667	8.40667	8.53333	8.02667	11.2933	76.3067	15.4933	14.2033	7.39333	8.99667	7.97	9.38333	51.2067	11.0233	10.1833
566.729	7.64	8.03667	6.39333	8.59333	51.49	14.27	8.3	5.48667	4.76667	5.53667	8.68667	49.9233	14.15	8.92667	8.23667	9.89333	8.82333	12.2867	57.3967	9.7	10.06	6.21	8.27667	8.41	11.4167	64.9667	21.0767	11.29	7.30667	8.42	8.24333	8.7	66.95	11.2433	9.65	8.61667	8.94	8.09333	11.5433	76.2567	15.68	14.3633	7.71333	9.11333	8.18333	9.6	51.7267	11.2267	10.3433
567.066	7.79	8.04	6.43667	8.60667	51.6533	14.5567	8.39	5.58667	4.93667	5.53333	8.71	50.0533	14.0133	9.11667	8.32	9.97	8.80333	12.1133	57.6467	9.80333	10.0767	6.3	8.29667	8.54333	11.5867	65.1033	21.3333	11.3967	7.23333	8.7	8.18333	8.76	67.1367	11.4267	9.9	8.59333	8.84	8.15333	11.5167	76.3133	15.5	14.4467	7.86667	9.14333	8.14	9.51333	51.7167	11.24	10.1667
567.403	8.04333	8.29333	6.73333	8.86333	51.8567	14.68	8.39333	5.79333	5.09	5.69667	8.67	50.13	14.19	9.27333	8.42	10.0333	8.94333	12.1567	57.9833	9.8	10.23	6.39667	8.49	8.54	11.6467	65.05	21.46	11.3667	7.31667	8.89667	8.55	8.98	67.4967	11.5667	10.25	8.94333	9.11667	8.29	11.8033	76.46	15.7167	14.77	8.15667	9.24333	8.50667	9.87333	51.9133	11.42	10.4667
567.74	8.13333	8.52667	6.93333	9.12667	51.8667	14.9067	8.39	6.12333	5.19333	5.77	8.95	50.3233	14.37	9.42667	8.63	10.1333	8.93	12.23	58.04	10.03	10.3267	6.49667	8.71333	8.73667	11.87	65.1867	21.6733	11.6233	7.51667	9.11667	8.77	9.18	67.6033	11.6933	10.41	9	9.36333	8.42	11.9333	76.5333	15.65	14.8067	8.20333	9.45333	8.57667	10.1167	51.9433	11.3967	10.4233
568.078	8.28	8.48333	6.93	9.13333	52.0633	14.9667	8.35667	6.06667	5.16667	5.81	9.08	50.3267	14.27	9.44	8.45	10.13	8.96333	11.9967	58.1133	9.98667	10.2333	6.6	8.70333	8.60667	12.0333	65.2533	21.51	11.54	7.52333	9.25333	8.82667	9.05	67.6733	11.7	10.3233	9.15	9.47	8.45	12.1533	76.4133	15.4267	14.7333	8.22333	9.57333	8.56667	10.0367	52.1	11.5433	10.4067
568.415	7.99333	8.15	6.85333	8.71333	51.5767	14.44	8.10667	5.82333	4.84333	5.50667	8.80667	50.0133	13.91	9.07	8.36	9.79	8.80667	11.6433	57.7433	9.71333	9.96	6.26667	8.47333	8.38667	11.6033	64.8833	21.2033	11.3567	7.25	8.92	8.56333	8.93333	67.28	11.55	10.06	8.89	9.11	8.30667	12.06	76.5333	15.2967	14.61	7.98	9.54	8.48667	9.87	52.11	11.36	10.2233
568.752	7.92667	8.26333	6.97	8.71	51.6267	14.16	8.08333	5.85333	4.65667	5.48667	8.84333	50.11	13.9367	8.90333	8.34667	9.78	8.97	11.7333	57.6633	9.63667	10.0733	6.25333	8.37667	8.38	11.3067	64.96	21.2767	11.27	7.34667	8.78667	8.43667	8.91667	67.1833	11.4967	9.80667	9.11333	9.29667	8.32667	12.42	76.9667	15.6133	14.8067	8.13	9.65667	8.73333	10.27	52.36	11.59	10.57
569.089	7.83	8.33333	6.95333	8.68	51.8	14.3933	8.22	5.85667	4.77	5.47333	9.09667	50.29	14.1467	8.89667	8.48333	9.77333	9.15667	11.83	57.86	9.75	10.23	6.35333	8.57333	8.41	11.4433	65.1267	21.5	11.4533	7.63333	8.74333	8.40333	8.92667	67.0567	11.5633	9.79333	8.77333	9.03667	8.37333	12.24	76.97	15.3933	14.6433	7.93333	9.53	8.58667	10.0567	52.0833	11.56	10.2967
569.426	7.68	8.15	6.74333	8.46667	51.6267	14.2867	8.07667	5.52333	4.71333	5.44333	8.86333	50.02	13.9967	8.87	8.26	9.66	8.86333	11.7167	57.6267	9.67333	10.0633	6.26667	8.42333	8.39333	11.2333	64.9233	21.2567	11.2133	7.39	8.69667	8.46333	8.83	67.05	11.3967	9.77333	8.73333	9.08667	8.41333	12.3533	76.8533	15.69	14.69	8.09667	9.64	8.75	10.17	52.22	11.6467	10.54
569.763	7.83	8.19667	6.69	8.52667	51.5833	14.2367	7.99667	5.5	4.8	5.59667	8.85333	50.2233	14.1367	8.82667	8.45	9.93333	8.98333	12.08	57.5933	9.71333	9.98	6.36333	8.55667	8.43667	11.35	65.02	21.2833	11.45	7.49	8.72667	8.55	9.04	67.0367	11.47	9.89333	8.48	8.98333	8.20333	12.0767	76.72	15.7967	14.5467	7.83333	9.21667	8.58667	10.02	52.1	11.48	10.3533
570.1	8.06	8.48333	6.83667	8.69333	51.8533	14.3833	8.22667	5.77333	4.92333	5.87	9.19667	50.3833	14.4767	9.16	8.39333	10.07	8.98	12.3933	57.91	9.91	10.1	6.73667	8.65667	8.76667	11.3733	65.4833	21.6067	11.6467	7.74	8.89333	8.88667	9.22	67.17	11.5867	9.98	8.61	9.20667	8.21	12.16	76.6333	15.8733	14.6433	8.01667	9.32667	8.65333	10.0933	51.8667	11.58	10.4467
570.436	8.16	8.60667	6.89333	8.67333	51.66	14.3633	8.12667	5.90667	5.06667	6.01333	9.25333	50.2467	14.55	9.37667	8.58	10.11	9.06667	12.4333	57.9833	9.93667	10.08	6.82667	8.71	8.71667	11.6	65.38	21.5	11.58	7.79667	9.00667	9.19	9.32667	67.1533	11.6833	10.13	8.55	9.24333	8.26333	12.0367	76.64	15.88	14.5467	7.84333	9.47333	8.77333	10.0067	51.95	11.5467	10.2967
570.773	8.11667	8.65	6.96	8.8	51.5433	14.2233	8.13667	6.03333	5.01333	6.05	9.05333	50.1933	14.36	9.41	8.57333	10.3367	8.98667	12.4467	57.8133	9.94667	10.0667	6.87333	8.65	8.83333	11.6067	65.1033	21.16	11.35	7.78333	9.13	9.09333	9.33333	67.2167	11.5633	10.1933	8.59	9.16	8.14	12.0433	76.56	15.8767	14.65	7.61333	9.53333	8.80667	9.88333	52.12	11.3567	10.33
571.11	8.51667	8.87333	7.32	9.16667	51.89	14.38	8.47333	6.30333	5.15667	6.32667	9.51667	50.7133	14.6067	9.50333	8.8	10.6133	9.36333	12.7733	58.28	10.0267	10.24	7.05	8.95	9.07	11.99	65.3867	21.3667	11.4433	8.16	9.40667	9.08667	9.46	67.35	11.8567	10.4433	8.64	9.22667	8.18	12.0333	76.6733	15.72	14.6267	7.55	9.55	8.77667	9.89667	52.28	11.3167	10.31
571.447	8.14	8.67333	7.27	9.05	51.7033	14.1467	8.45333	6.27667	4.92	6.18	9.29667	50.53	14.3533	9.43333	8.62667	10.4367	9.23667	12.5267	58.2433	9.83667	10.2667	6.94667	8.75667	9.19667	11.8267	65.3033	21.3467	11.2567	7.85	9.24	8.88	9.23333	67.3467	11.7	10.2067	8.86	9.48	8.46	12.2533	77.24	15.9267	14.6933	7.84667	9.95	9.08	10.3	52.5667	11.4567	10.5467
571.783	8.29	8.99	7.4	9.22667	51.8033	14.3267	8.66	6.51667	5.22667	6.31667	9.35333	50.7733	14.5267	9.66667	9.07	10.7933	9.49333	12.79	58.42	10.0367	10.5233	7.16667	9.01333	9.24333	12.24	65.46	21.5333	11.4367	8.17333	9.57	9.06333	9.59333	67.59	12.0367	10.42	9.01667	9.46667	8.44333	12.0867	77.48	15.79	14.7033	7.68	10.0067	9.08667	10.32	53.03	11.2333	10.5967
572.12	8.30667	8.92333	7.32	9.35667	51.67	14.3133	8.81333	6.56333	5.20667	6.41	9.26667	50.7267	14.46	9.53333	9.07667	10.9067	9.41333	12.9433	58.4067	9.95	10.42	7.09333	8.88	9.25667	12.3033	65.34	21.39	11.4967	8.13667	9.59333	8.91667	9.47333	67.3733	11.98	10.4267	9.04667	9.44667	8.54	12.12	77.2133	15.6267	14.6833	7.82667	9.80667	9.11	10.2467	52.8467	11.2333	10.41
572.456	8.37667	8.95	7.47333	9.46333	51.5567	14.2667	8.81333	6.52	5.24667	6.31	9.36	50.82	14.6533	9.57333	9.18667	10.92	9.67667	13.03	58.59	10.01	10.4567	7.13333	8.95667	9.31667	12.4433	65.6667	21.5967	11.77	8.11667	9.62	8.90667	9.61667	67.48	12.1167	10.31	9.50333	9.96667	8.97333	12.5467	77.4	15.94	14.96	8.43333	10.1433	9.45333	10.56	53.03	11.7	10.7167
572.793	8.3	9.10667	7.45333	9.47	51.3933	14.3	8.80667	6.62667	5.48667	6.42667	9.29667	50.71	14.63	9.73	9.31667	10.87	9.70333	13.03	58.3867	10.0733	10.58	7.33333	8.89	9.33333	12.46	65.7367	21.6833	11.8533	8.14	9.56667	9.08333	9.78	67.3933	12.0433	10.4133	9.49333	9.86667	8.93333	12.55	77.6467	15.9233	14.93	8.55667	10.0133	9.46667	10.33	52.9233	11.8	10.7333
573.129	8.18333	9.01	7.16667	9.38	51.3033	14.1567	8.46	6.46	5.37333	6.17333	9.16	50.8267	14.6333	9.47667	9.07667	10.55	9.54333	12.9167	58.5033	9.78333	10.3467	7.15667	8.74333	8.86	12.3233	65.65	21.4767	11.5667	8.14667	9.40667	8.97333	9.54667	67.4867	11.76	10.3633	9.65	9.72	9.01667	12.53	77.3333	15.91	15.17	8.52	9.97333	9.6	10.3633	52.8067	11.8767	10.7533
573.466	8.09667	8.79	7	9.40667	51.4433	14.1033	8.42333	6.33333	5.25667	6.02333	9.10667	50.8867	14.6533	9.21333	8.83667	10.3667	9.38	12.81	58.5833	9.49667	10.0767	6.96333	8.71333	8.77	12.17	65.7133	21.2033	11.25	7.96333	9.37	8.78667	9.29667	67.86	11.46	10.1867	9.52	9.55333	8.94	12.64	76.97	16.05	15.0667	8.52	9.9	9.53	10.2067	52.3867	11.9633	10.5567
573.802	7.86333	8.61333	6.99333	9.19	51.53	13.9667	8.2	6.04333	5.14667	5.78333	9.06333	50.9	14.3167	9.12667	8.48	10.1167	9.12	12.4667	58.4733	9.37333	9.81333	6.71667	8.67	8.78	12.0067	65.7667	21.1033	11.2233	7.81333	9.2	8.67667	9.23	68.0233	11.36	10.0333	9.43	9.49333	9.03333	12.5867	77	16.15	15.0633	8.45333	9.96667	9.28333	10.31	52.4967	11.8867	10.7133
574.138	7.84333	8.76333	6.81667	9.15	51.9	13.9767	8.48667	6.05	5.17333	5.87333	9.24667	51.1133	14.2733	9.13	8.49333	10.0433	8.92	12.53	58.6767	9.29667	9.73	6.80667	8.48667	8.87333	12.13	66.0533	21.1633	11.11	7.91667	9.26	8.79667	9.18667	68.5233	11.4933	10.2633	9.21333	9.32667	8.69333	12.3933	77.0767	16.0633	14.7833	8.11667	9.67667	9.09333	10.1933	52.82	11.8167	10.4533
574.475	7.64667	8.45667	6.6	8.86667	51.6867	13.7467	8.27333	5.75667	4.68333	5.61	8.94667	50.8433	14.0933	8.84333	8.21333	9.99	8.76	12.42	58.6033	9.04667	9.31333	6.58667	8.47333	8.53667	12.0133	65.69	20.8	10.9033	7.65	8.96333	8.52333	8.95	68.47	11.27	9.87667	9.18	9.33333	8.66333	12.3133	77.0767	16.09	14.9433	7.96	9.73	9.02667	10.25	53.0367	11.6367	10.2733
574.811	7.71	8.65667	6.85667	9.01	51.97	14.04	8.39	5.81667	4.93	5.88	9.14667	50.7833	14.2367	9.16	8.46333	10.4067	8.80333	12.67	58.8333	9.29333	9.53333	6.77	8.76	8.86	12.2367	65.8867	20.9133	11.1867	7.83333	9.25667	8.57667	9.31	68.5667	11.5333	10.03	9.17333	9.55	8.69667	12.43	77.2267	16.1067	14.9867	8	9.86333	9.05	10.23	53.21	11.78	10.44
575.147	7.93333	8.88	7.02	9.08333	51.8867	14.02	8.31333	5.86667	5	6.12333	9.09	50.6433	14.2	9.33667	8.64	10.3967	8.92667	12.78	58.75	9.46	9.64	6.77	8.79333	8.95	12.4167	65.9367	20.95	11.4067	7.91	9.22	8.72333	9.42333	67.9533	11.5667	10.27	9.21333	9.63333	8.58333	12.5467	77.9633	16.0767	15.0967	7.92	9.78	9.04667	10.2633	53.6467	11.8667	10.72
575.483	8.3	9.14	7.21	9.41667	52.0367	14.44	8.64667	6.25667	5.29667	6.51	9.37333	50.9867	14.69	9.67	9.13667	10.85	9.47333	13.3067	59.1567	9.88333	9.99333	7.22333	9.07667	9.27333	12.8367	66.12	21.1267	11.63	8.09333	9.40667	9.15	9.7	68.0067	11.8567	10.59	9.02667	9.49	8.28667	12.39	78.2867	15.8233	14.9033	7.77	9.63	9.07	9.99667	53.6233	11.6933	10.6433
575.819	8.28333	8.75333	7.25667	9.23667	51.8167	14.3	8.12333	6.38667	5.29667	6.42	9.21667	51.01	14.61	9.52667	8.94333	10.78	9.43667	13.1667	58.8733	9.67333	9.99	7	9.13667	9.03	12.7233	66.0433	20.9733	11.55	7.95333	9.36667	9.19667	9.62333	67.6633	11.7067	10.4833	8.93333	9.50667	8.62333	12.4467	78.2733	15.7867	15.1467	7.93	9.74333	9.22667	10.1533	53.4433	11.6833	10.8633
576.155	8.57667	9.04333	7.55333	9.58333	52.2367	14.3967	8.4	6.66	5.59	6.56667	9.36333	51.2667	14.9067	9.75333	9.29	10.8633	9.60667	13.26	59.2533	9.92667	10.3567	7.20333	9.26333	9.35667	13.0567	66.75	21.2767	11.8167	8.15	9.70333	9.56667	9.9	67.97	11.9633	10.8433	8.76333	9.32333	8.8	12.6233	78.6467	15.7	15.08	8.04667	9.84	9.24333	10.06	53.4633	11.6533	10.8633
576.491	8.78	9.20667	7.67667	9.7	52.19	14.2667	8.57333	6.76333	5.56333	6.44667	9.45667	51.4567	14.89	9.76667	9.38	10.7667	9.74667	13.2467	59.0867	9.90667	10.3167	7.08333	9.20667	9.43333	13.0633	66.8933	21.26	11.84	8.10667	9.81333	9.70667	9.80333	68.07	11.87	10.9133	8.67667	9.12333	8.64667	12.6367	78.9233	15.78	15.0633	7.97667	9.54667	9.02	10.0667	53.4	11.48	10.6867
576.827	8.39333	9.03333	7.52667	9.66	52.26	14.1233	8.49	6.68333	5.51	6.14333	9.35667	51.7433	14.9233	9.61333	9.25	10.6133	9.73	13.0133	59.4333	9.64667	10.0967	6.97	9.06333	9.32	13.03	67.04	21.1567	11.72	8.05333	9.79667	9.54667	9.69667	68.6267	11.9167	10.77	8.81667	9.33	9.08667	12.7733	78.7733	15.7833	15.3167	8.36	9.81333	9.12333	10.2933	53.4833	11.6633	10.81
577.163	8.13333	9.04667	7.49667	9.43	52.2067	13.7133	8.21667	6.51667	5.23333	5.84333	9.07333	51.4933	14.7133	9.43333	9.02	10.2033	9.39667	12.8	59.2067	9.35667	9.91667	6.61667	8.90333	9.15333	12.7033	67.2333	21.1	11.5767	8.08667	9.72333	9.27333	9.56333	68.6133	11.6833	10.8833	8.93667	9.41667	9.15	13.0133	78.68	15.9267	15.42	8.35	10.03	9.07667	10.47	53.7333	11.8733	10.8
577.499	8.30667	9.27333	7.39667	9.66333	52.09	13.8433	8.27	6.37667	5.15667	5.84	8.98	51.3733	14.52	9.53667	9.12	10.2333	9.3	12.8667	59.2833	9.35667	9.76667	6.63333	8.88667	9.35333	12.6667	67.34	21.1567	11.5867	8.07667	9.63333	9.34	9.62667	68.68	11.5733	10.8067	8.76	9.21333	8.90333	12.89	78.5233	15.8067	15.1467	8.17	9.75	8.86667	10.2367	53.4533	11.49	10.62
577.835	8.36	9.23333	7.38333	9.51	52.02	13.8133	8.16333	6.26333	5.03667	5.84667	8.97333	51.7067	14.32	9.50333	9.03333	10.3433	9.17	12.9533	59.56	9.15	9.61	6.49333	8.93667	9.36	12.4867	67.3267	21.1867	11.4867	8.05667	9.78333	9.15	9.48667	68.6633	11.6667	10.7067	9.12333	9.74667	9.14	13.1033	78.4067	16.0333	15.4567	8.4	9.93	9.14667	10.61	53.4967	11.9	10.9433
578.171	8.53	9.32	7.59	9.69	52.09	14.0467	8.35667	6.55	5.13667	6.11	9.03333	51.8533	14.4133	9.71667	9.09333	10.37	9.35	13.1233	59.7267	9.34667	9.76667	6.76333	9.09	9.48333	12.5533	67.3833	21.4	11.5767	8.17333	9.77	9.34	9.65667	68.5	12.02	10.9333	9.08	9.55667	9.13	12.9833	78.0733	15.73	15.1633	8.27333	10.08	9.06667	10.5367	53.51	11.8533	10.9167
578.507	8.71333	9.22333	7.75333	9.63667	52.1067	14.1233	8.32	6.41333	5.06667	6.18667	9.05667	51.7233	14.3133	9.88667	9.12333	10.5733	9.35333	13.1133	59.5967	9.43333	9.9	6.87	9.16333	9.69	12.5133	67.4167	21.5733	11.5333	8.17	9.76333	9.34333	9.85	68.3133	11.9567	10.84	8.8	9.44333	9.05333	12.8467	77.93	15.79	15	8.16	9.93333	9.11667	10.6067	53.4	11.86	10.7367
578.842	8.88333	9.33	7.88667	9.8	52.3067	14.3467	8.60667	6.51333	5.33	6.41667	9.31	51.9867	14.61	9.91667	9.24333	10.75	9.45	13.1167	59.81	9.66333	10.1	7.16667	9.32	9.83667	12.8233	67.4433	21.63	11.44	8.14	10.0367	9.55	9.94667	68.5267	12.1433	10.73	8.84667	9.62667	9.17333	12.96	78.2533	16.05	15.08	8.14667	9.8	9.26333	10.67	53.4967	11.8367	10.82
579.178	8.64667	9.17	7.89333	9.62	52.3733	14.02	8.66	6.38667	5.28333	6.35667	9.16	51.9233	14.7567	9.88667	9.24	10.82	9.45667	13.1	59.93	9.58333	9.88667	6.97667	9.16667	9.75333	12.75	67.57	21.6533	11.3367	7.95333	9.95667	9.31667	9.81667	68.41	11.9633	10.7933	9.14667	9.99667	9.33667	13.1433	78.4667	16.2533	15.4367	8.27667	10.1133	9.56	11	53.93	12.1233	11.0467
579.514	8.50333	9.29	8.01333	9.76333	52.4933	14.14	8.74333	6.44	5.59333	6.45	9.21667	51.8667	14.9	9.94333	9.15	10.78	9.53333	13.29	59.9067	9.81667	9.97	7.15333	9.17333	9.82333	12.8967	67.69	21.6867	11.4233	8.03	9.83333	9.52333	9.94333	68.6	11.9	10.7833	9.05667	9.88667	9.01	13.0567	78.58	16.2867	15.3367	8.21667	9.99	9.44667	10.81	54.2367	12.04	11.0067
579.849	8.26	9.07	7.83667	9.70333	52.3533	13.8833	8.44333	6.40333	5.59	6.29333	9.08667	51.5867	14.89	9.77	9.11667	10.6667	9.40667	13.2167	59.99	9.70667	9.96667	6.99333	9.05667	9.84	12.9133	67.6833	21.4667	11.48	7.98333	9.67	9.37667	9.68333	68.5233	11.75	10.5633	8.88	9.91667	8.94333	13.0833	79.0833	16.3067	15.3567	8.11667	9.75	9.28667	10.5667	54.44	11.7667	10.8167
580.185	8.32	9.28333	7.93667	9.60333	52.2267	13.8933	8.65333	6.52	5.70667	6.40667	9.27333	51.56	15.0033	9.69	9.13333	10.83	9.61667	13.43	60.1567	9.65667	9.93	7.13333	9.14	10	13.09	67.61	21.47	11.6467	8.03	9.81	9.53333	9.73	68.7333	11.83	10.7967	8.95333	9.98333	8.86667	12.9033	79.1967	16.0833	15.22	7.93333	9.89	9.39667	10.3267	54.5367	11.4367	10.6933
580.52	8.16333	8.97	7.62667	9.47	51.8733	13.57	8.37333	6.35667	5.4	6.08667	9.03333	51.3667	14.5667	9.54333	8.81667	10.6667	9.45667	13.3767	60.1133	9.27667	9.57667	6.90667	9.12667	9.96	12.8133	67.3233	21.0867	11.63	7.9	9.5	9.24333	9.44333	68.6933	11.57	10.58	8.66	9.69667	8.71667	12.62	78.9333	15.79	15.1267	7.77667	9.92333	9.19	10.3	54.3933	11.3833	10.59
580.856	8.39667	9.25	7.89	9.73667	51.9833	13.9533	8.62667	6.52667	5.53	6.45667	9.46	51.5067	14.81	9.71333	9.02	10.7433	9.67	13.5033	60.31	9.52667	10.03	7.14	9.41	10.1367	13.1067	67.2067	21.0667	11.8433	8.18333	9.87667	9.45667	9.65333	68.8467	11.9033	10.6967	8.66	9.66333	8.80333	12.74	79.4633	15.7167	14.9633	7.99333	9.98667	9.17333	10.1367	54.59	11.45	10.6333
581.191	8.20667	9.04	7.60667	9.49667	51.68	13.69	8.44667	6.54	5.29	6.24	9.31333	51.3067	14.54	9.61667	8.86333	10.64	9.51	13.26	60.2133	9.25	9.82333	6.93	9.35333	9.87667	12.9367	66.73	20.8267	11.59	8.02667	9.72667	9.19	9.58	68.6133	11.82	10.6033	8.45333	9.47333	8.8	12.6267	79.41	15.46	14.7767	7.87667	9.75	9.02	10.0767	54.3733	11.2967	10.53
581.526	8.47	9.29667	7.78	9.59667	51.9	13.9533	8.63	6.47667	5.44667	6.46	9.58667	51.5567	14.7267	9.70333	9.03	10.96	9.56333	13.3533	60.33	9.46667	9.85667	7.07333	9.64667	10.0733	13.19	67.0567	21.1533	11.7167	8.19667	9.91333	9.47	9.87667	69.1367	11.9467	10.97	8.44	9.61333	8.78333	12.8533	79.3967	15.4833	14.96	8.17333	9.86	9.36667	10.35	54.62	11.6467	10.8033
581.862	8.64333	9.39	7.74667	9.96333	52.0433	14.0333	8.58	6.74	5.53667	6.40333	9.58333	51.57	14.6733	9.85	9.23667	11.06	9.50667	13.4933	60.5967	9.68333	10.0367	7.19	9.74667	9.93333	13.1767	67.15	21.1033	11.7133	8.32333	9.95	9.48333	9.76333	68.99	12.11	10.9567	8.58	9.53667	8.88	13.1633	79.41	15.6667	15.0667	8.34	9.78667	9.16667	10.6167	54.5133	11.8433	11.06
582.197	8.81	9.65667	7.91	10.1533	52.2967	14.2767	8.61	6.82333	5.85667	6.61667	9.73	51.7033	14.7867	9.91	9.57333	11.2633	9.73333	13.6833	60.8933	9.92667	10.1333	7.38	9.76667	10.0167	13.27	67.5	21.2267	11.84	8.37333	10.1833	9.71333	10.0433	69.1433	12.2933	11.04	9.05	9.90333	9.19	13.4233	79.5333	15.7167	15.1433	8.6	9.91667	9.19	10.7067	54.7	12.0867	11.23
582.532	9.21333	9.98333	8.09333	10.33	52.5333	14.51	8.65333	7.19333	6.21333	6.83	10.0033	52.1233	14.98	10.1733	9.94667	11.62	9.97667	14.0333	61.3133	10.1267	10.2567	7.84333	10.1467	10.4367	13.4433	67.9067	21.3867	12.18	8.66333	10.4233	9.99333	10.4567	69.4367	12.6567	11.2533	8.94333	9.83667	8.98333	13.3433	79.2067	15.5533	15.2667	8.26	9.85333	9.02667	10.6267	54.3833	11.9833	11.04
582.867	9.45667	10.0333	8.13667	10.3833	52.8133	14.56	8.65333	7.19333	6.28333	6.93333	9.98	52.2467	15.09	10.2133	10.1067	11.6333	10.0767	14.0433	61.4333	10.1333	10.3767	7.88333	10.23	10.7133	13.52	68.24	21.41	12.2667	8.77333	10.56	10.1833	10.4367	69.63	12.62	11.1433	9.05667	9.94333	9.12	13.3467	79.0333	15.55	15.3	8.32333	10.0533	9.06667	10.7567	54.3667	11.9833	11.0567
583.202	9.27667	9.86667	8.05	10.28	52.5433	14.34	8.67667	7.14	6.32	6.75	9.93333	52.0767	14.9933	10.0933	9.98	11.5233	9.96333	13.9633	61.35	9.97667	10.1667	8.01	10	10.42	13.27	68.0333	21.08	11.9	8.80333	10.6433	9.97	10.33	69.2833	12.31	10.92	9.18667	10.0967	9.43333	13.4567	79.0567	15.72	15.3233	8.34667	10.31	9.15667	10.85	54.1367	12.0067	11.15
583.537	9.1	9.50667	7.80333	9.87667	52.45	14.0433	8.38667	6.75	6.17	6.63	9.92333	52.0767	14.64	9.85333	9.69667	11.23	9.77333	13.7067	61.18	9.59	9.87	7.57667	9.76	10.3167	13.0567	67.95	20.8733	11.4633	8.54667	10.32	9.66667	10.03	69.44	11.9067	10.6967	8.98667	10.1367	9.48667	13.27	79.2	15.6267	15.24	8.3	10.4533	9.28	10.8733	54.27	12.0033	10.9033
583.872	9.20667	9.55	7.8	9.83	52.3833	13.9567	8.38	6.67667	5.97667	6.45667	9.98	52.22	14.75	9.95667	9.63	11.24	9.68667	13.5533	61.1167	9.41	9.94	7.56667	9.84667	10.0533	13.2567	67.8967	20.9833	11.3633	8.56667	10.2733	9.83	9.93667	69.5233	11.8267	10.8133	8.77667	9.86667	9.08	13.11	79.5533	15.53	15.2933	8.23667	10.3733	9.39	10.8533	54.42	11.5967	10.78
584.207	8.93333	9.39333	7.57667	9.68	52.16	13.6633	8.33333	6.57333	5.71333	6.21333	9.73667	51.8467	14.5033	9.84333	9.42333	10.93	9.57667	13.46	60.7933	9.16333	9.77667	7.44333	9.67333	9.92	13.07	67.7933	20.8267	11.0567	8.32667	9.98	9.71	9.82	69.14	11.7267	10.5233	8.79	9.76333	8.98	12.9933	79.12	15.5733	15.0967	8.38333	10.2467	9.34333	10.9367	54.4833	11.55	10.81
584.542	9.10667	9.71667	7.77	10.01	52.1567	13.8367	8.48	6.61	5.75333	6.44	10.03	51.8833	14.6633	10.05	9.54333	11.1333	9.90667	13.6633	60.84	9.27	9.9	7.71333	9.64667	10.07	13.2633	67.86	21.0267	11.2333	8.47667	10.14	9.84667	10.0767	69.2433	11.9233	10.9267	8.74	9.56667	8.91667	13.0367	79.21	15.52	15.13	8.26	10.2433	9.43	10.9433	54.4867	11.5633	10.8067
584.877	9.34	9.78333	7.8	10.0067	52.2567	13.7933	8.54	6.67	5.69	6.65667	10.0267	52.1767	14.6433	10.2967	9.63	11.1567	10.0833	13.6667	60.9533	9.26333	10.0833	7.57	9.93	10.1333	13.4233	67.7633	21.2433	11.48	8.46667	10.21	9.83667	10.42	69.3	12.33	10.9867	8.86667	9.57	8.92	12.96	79.2467	15.5633	15.26	8.28333	10.29	9.42667	10.7767	54.7933	11.56	10.7367
585.212	9.5	10.15	8.08667	10.26	52.0833	13.9533	8.71667	7.02667	5.84	6.86	9.95333	52.2333	15.0267	10.5567	9.90667	11.27	10.32	13.8467	60.8433	9.59333	10.2767	7.98333	10.22	10.4233	13.7267	67.82	21.4533	11.9033	8.72667	10.6867	10.1833	10.8267	69.2367	12.4533	11.19	8.98667	9.69333	8.74333	13.0633	79.3433	15.5	15.3667	8.46	10.2567	9.35667	10.6567	54.8633	11.5033	10.8467
585.547	9.36333	10.17	8.01667	10.2133	52.1267	13.9867	8.53	7.04	5.87	6.87667	9.85667	52.1967	14.8833	10.4367	9.86667	11.12	10.2333	13.9733	61.0633	9.48	10.16	7.89	10	10.46	13.5333	68.09	21.4767	11.8367	8.76333	10.6233	9.91	10.8333	69.18	12.3167	11.0333	9.03667	9.78333	8.99667	13.2667	79.0833	15.6333	15.44	8.47667	10.3567	9.41333	10.7067	54.4833	11.63	11.0367
585.881	9.16333	9.80333	7.86	10.06	51.7767	13.8	8.31667	6.61	5.71667	6.80333	9.77667	52.1867	14.6267	10.0033	9.49667	11.03	10.1467	13.8667	61.1933	9.28	9.86333	7.69333	9.84667	10.0633	13.4367	67.8767	21.3167	11.4967	8.61	10.4267	9.60333	10.37	69.2767	11.83	10.98	8.91333	9.80667	9.05333	13.2633	79.51	15.5533	15.45	8.29	10.3	9.32	10.6067	54.7	11.52	10.9333
586.216	8.96333	9.67667	7.77	9.76667	51.4533	13.5967	8.12	6.61333	5.70667	6.56667	9.49667	52.1133	14.4367	9.69667	9.4	10.7767	9.90333	13.73	61.0867	9.12	9.67333	7.49	9.77333	9.89667	13.2	67.6333	21.0367	11.2	8.48	10.2867	9.32333	10.0533	69.1633	11.6767	10.7	9.00333	9.95	9.17333	13.2567	79.7133	15.68	15.5033	8.40333	10.48	9.40667	10.6533	54.9067	11.5833	11.0267
586.551	8.56	9.67333	7.71333	9.69333	51.2567	13.56	7.79	6.46667	5.58333	6.34	9.25667	51.85	14.26	9.40333	9.12	10.68	9.62667	13.6267	60.9367	8.86333	9.33667	7.37333	9.44	9.84333	12.97	67.56	20.56	10.8567	8.25	10.0567	9.14333	9.56667	68.79	11.1167	10.38	8.99667	9.93667	9.15	13.3167	79.9833	15.7267	15.5067	8.54333	10.35	9.39667	10.6967	54.8433	11.6333	11.1233
586.885	8.37667	9.51667	7.62333	9.79333	51.3433	13.5633	7.81	6.43	5.56	6.23	9.39	51.94	14.4433	9.34667	8.99333	10.8933	9.55333	13.67	61.07	8.67667	9.21333	7.23	9.45	9.71	12.95	67.8	20.46	10.8233	8.19667	9.96667	8.99667	9.53667	68.6467	11.17	10.3367	8.77	9.67667	9.09	13.1933	79.4367	15.5167	15.3433	8.22667	10.1533	9.34333	10.6033	54.4367	11.5	10.97
587.22	8.39	9.52667	7.81333	10.01	51.4467	13.46	8.00333	6.41333	5.63667	6.27667	9.52333	51.76	14.57	9.36667	9.10333	10.9967	9.63667	13.71	60.95	8.77667	9.32333	7.22333	9.65333	9.93	13.1167	67.7067	20.2867	10.7833	8.21	10.15	9.25667	9.55333	68.77	11.22	10.5367	8.92667	9.97	9.01667	13.4	79.33	15.56	15.3633	8.28667	10.0933	9.50667	10.8433	54.6433	11.69	11.0167
587.555	8.38667	9.66333	8.11333	10.1	51.7	13.4833	8.05	6.48333	5.7	6.02	9.49	51.86	14.5667	9.35	9.18667	11.1533	9.39667	13.6267	60.9567	8.82667	9.4	7.17	9.49	10.0033	13.09	67.9367	20.2633	10.8633	8.32	10.35	9.29667	9.60667	68.89	11.3733	10.59	8.96	9.94333	8.97333	13.43	79.4967	15.5067	15.3767	8.41	10.2	9.66333	10.8133	54.59	11.76	10.9933
587.889	8.22333	9.51333	8.11	10.27	51.8333	13.4733	8.02333	6.33667	5.66333	5.93	9.57667	52.0933	14.47	9.24333	9.15667	11.32	9.28667	13.6567	61.0733	8.93333	9.36	7.01	9.62333	10.0933	13.2167	68.0867	20.2067	10.9967	8.11667	10.26	9.34	9.65333	68.9	11.24	10.73	9.12667	10.01	9.19	13.68	79.62	15.49	15.45	8.50333	10	9.72333	11.01	54.6767	11.8833	10.99
588.223	8.25333	9.28	8	10.3233	51.81	13.3333	8.01667	6.29	5.46333	6.02667	9.66667	52.16	14.4267	9.12667	9.23	11.2933	9.30333	13.7433	61.3033	8.82667	9.32667	7	9.74	10.13	13.33	68.3867	20.43	11.0067	8.16333	10.33	9.47333	9.97	69.4033	11.2233	10.8333	8.98	9.86333	9.05	13.57	79.8533	15.18	15.2467	8.08667	10.1667	9.66667	11.1967	54.8633	11.8367	11.09
588.558	8.28333	9.15	7.83667	10.1433	51.71	13.28	7.86333	5.98667	5.26667	5.98333	9.44667	52.2033	13.9967	8.98333	9.24667	11.0933	9.22667	13.76	61.31	8.78667	9.20333	6.93333	9.60667	9.99	13.2467	68.39	20.25	10.9067	8.04333	10.2367	9.49	9.86333	69.4267	11.1533	10.6733	8.91333	9.77	8.93667	13.5333	80.2467	15.03	15.1367	7.87333	9.97333	9.52667	11.11	55.0067	11.6633	11.0833
588.892	8.35667	9.26667	7.82667	9.93667	51.59	13.2067	7.62333	6.1	5.29	6.22	9.37	52.4767	13.9867	9.18	9.04	11.19	9.18333	13.81	61.48	8.68333	8.99	6.96333	9.57333	9.81	13.2967	68.4133	20.3933	10.9333	8.09	10.2833	9.49	10	69.3867	11.3233	10.5967	8.63333	9.55667	8.64333	13.2633	80.15	14.87	15.0067	7.82333	9.86667	9.46333	10.8133	55.1633	11.6867	10.9867
[truncated: 827 more rows]
[truncated: 21 more columns]

## Sheet: Males in breedind season
Wave length (nm)	M1.head	M1.dorsal	M1.tail	M1.cheek	M1.lowerjaw	M1.lateral	M1.posterior lateral	M2.head	M2.dorsal	M2.tail	M2.cheek	M2.lowerjaw	M2.lateral	M2.posterior lateral	M3.head	M3.dorsal	M3.tail	M3.cheek	M3.lowerjaw	M3.lateral	M3.posterior lateral	M4.head	M4.dorsal	M4.tail	M4.cheek	M4.lowerjaw	M4.lateral	M4.posterior lateral	M5.head	M5.dorsal	M5.tail	M5.cheek	M5.lowerjaw	M5.lateral	M5.posterior lateral	M6.head	M6.dorsal	M6.tail	M6.cheek	M6.lowerjaw	M6.lateral	M6.posterior lateral	M7.head	M7.dorsal	M7.tail	M7.cheek	M7.lowerjaw	M7.lateral	M7.posterior lateral
[truncated: 1,949 more rows]
[truncated: 21 more columns]

[truncated: 3 more sheets: Females in non-breedind season, Females in breedind season, Grass]
